# Supplementary material
Source: PubMed Central journal article supplement (PMC2874090)

<sup>1</sup>H-NMR of **29**

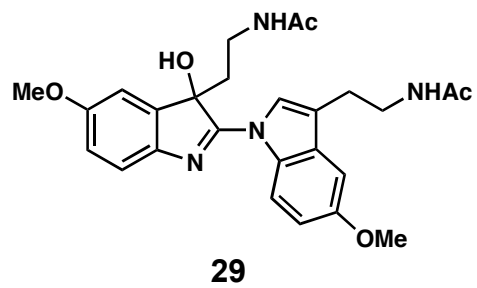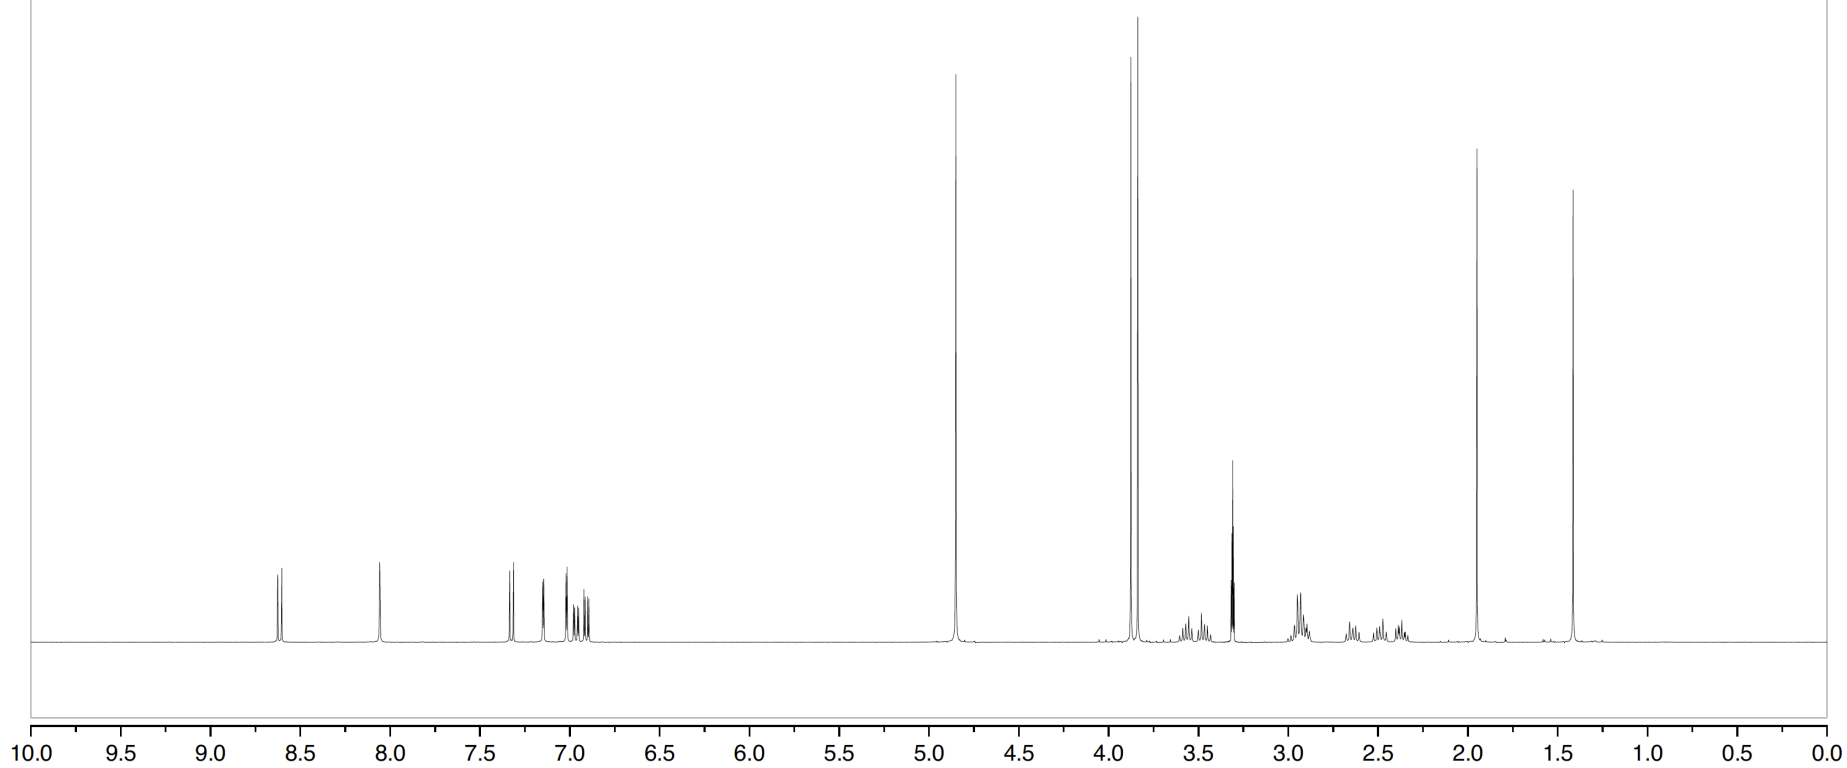

<sup>13</sup>C-NMR of **29**

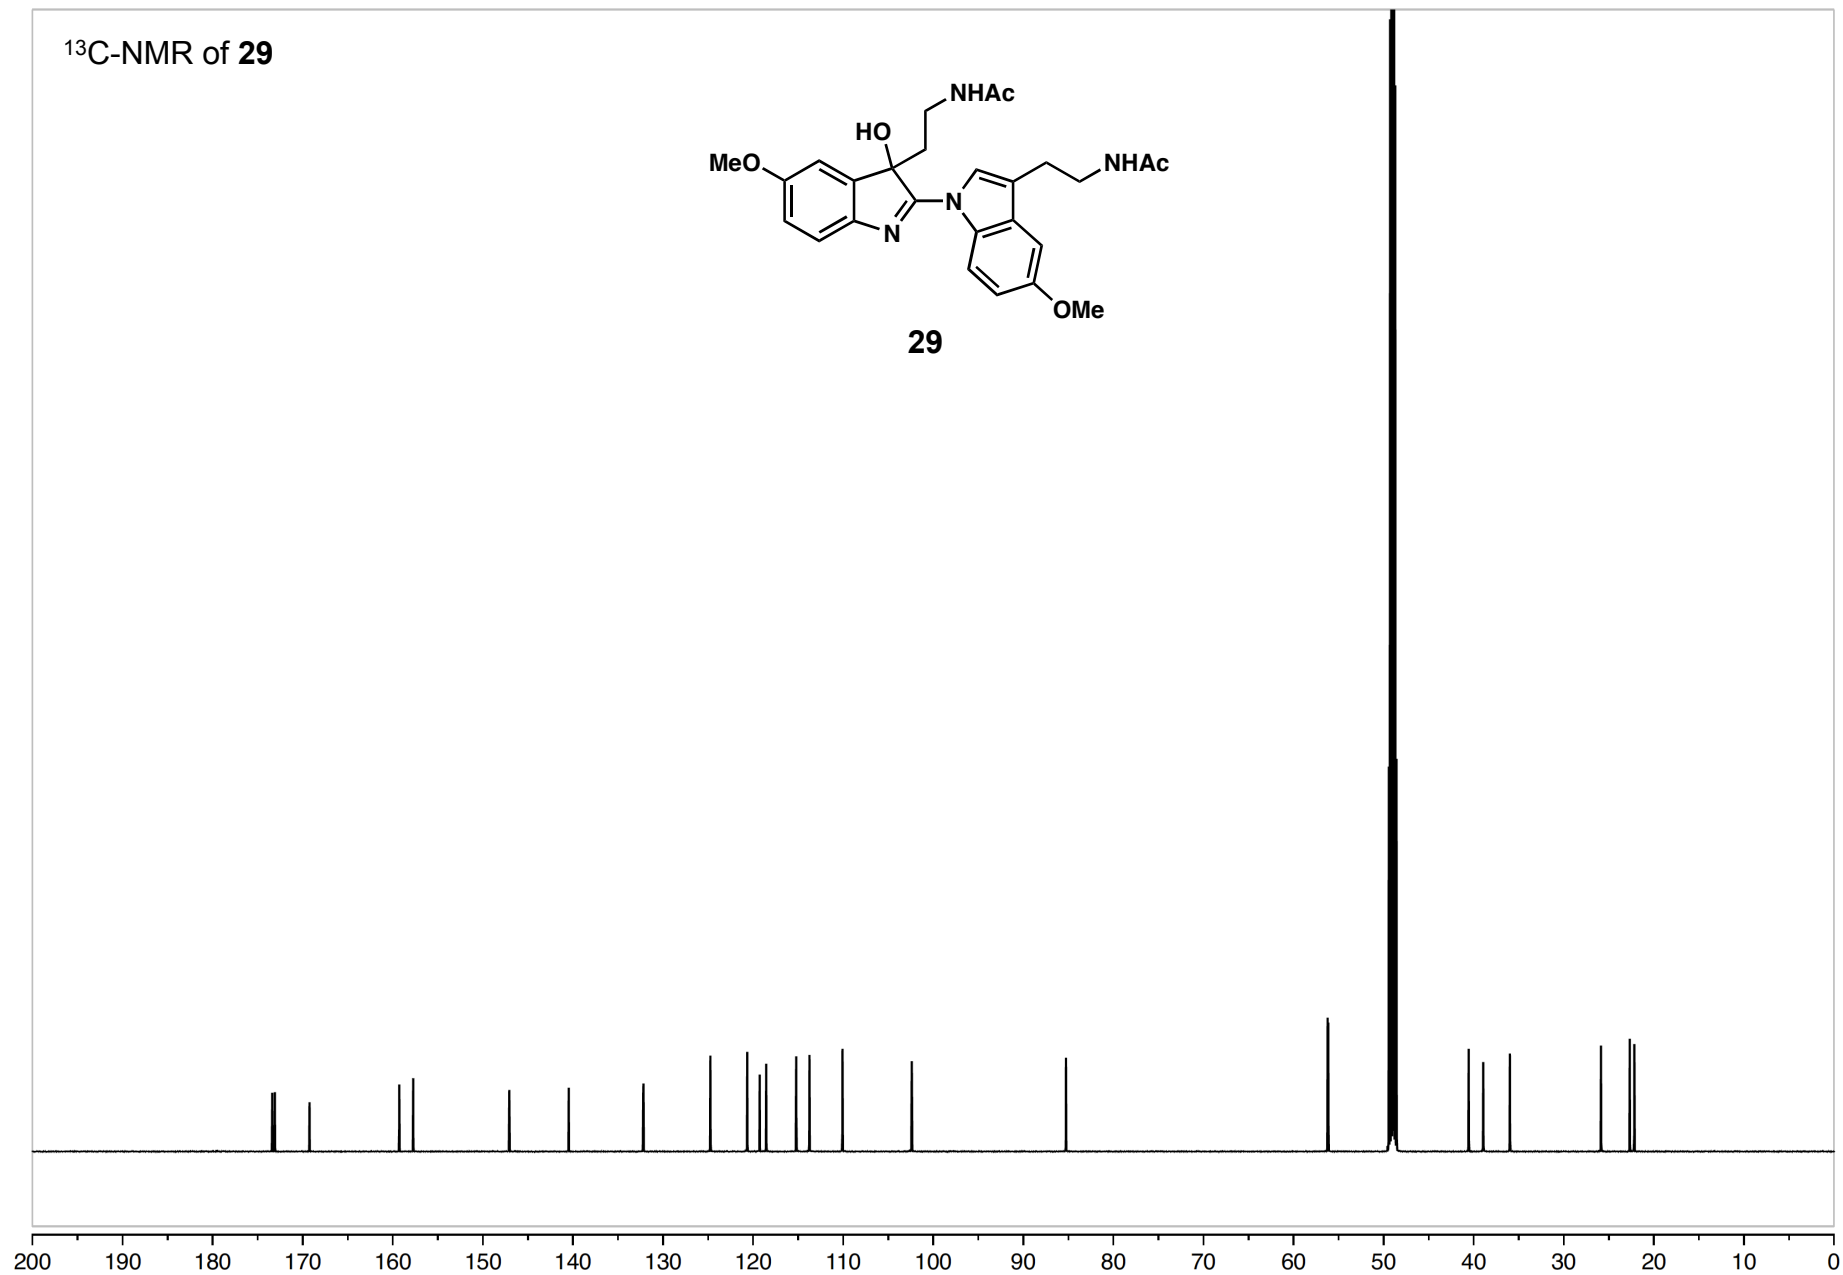

HMQC of **29**

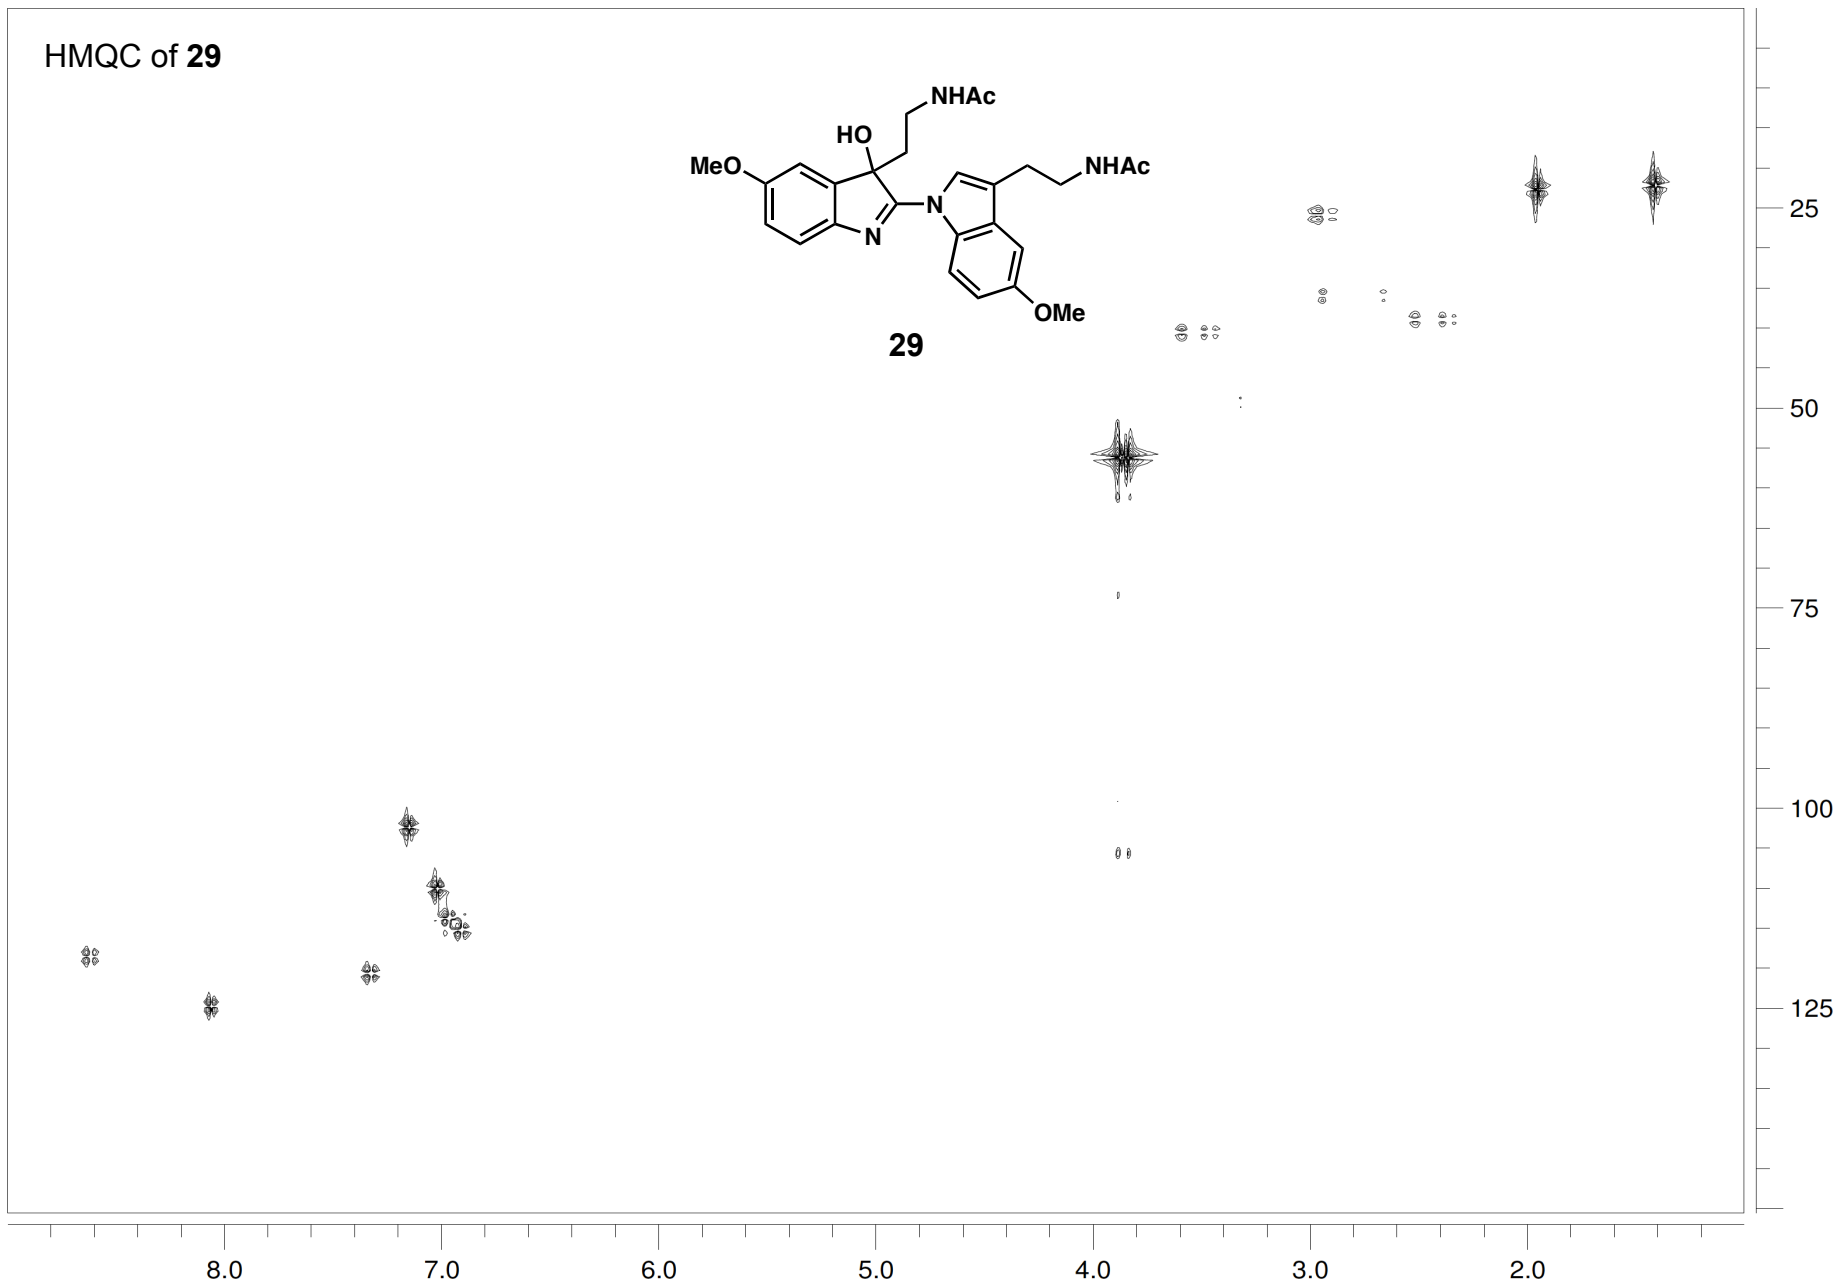

COSY of **29**

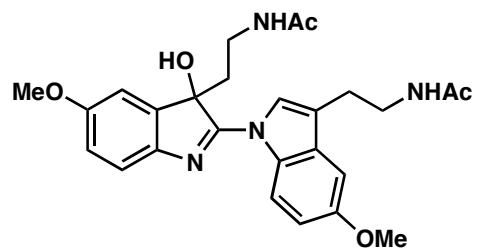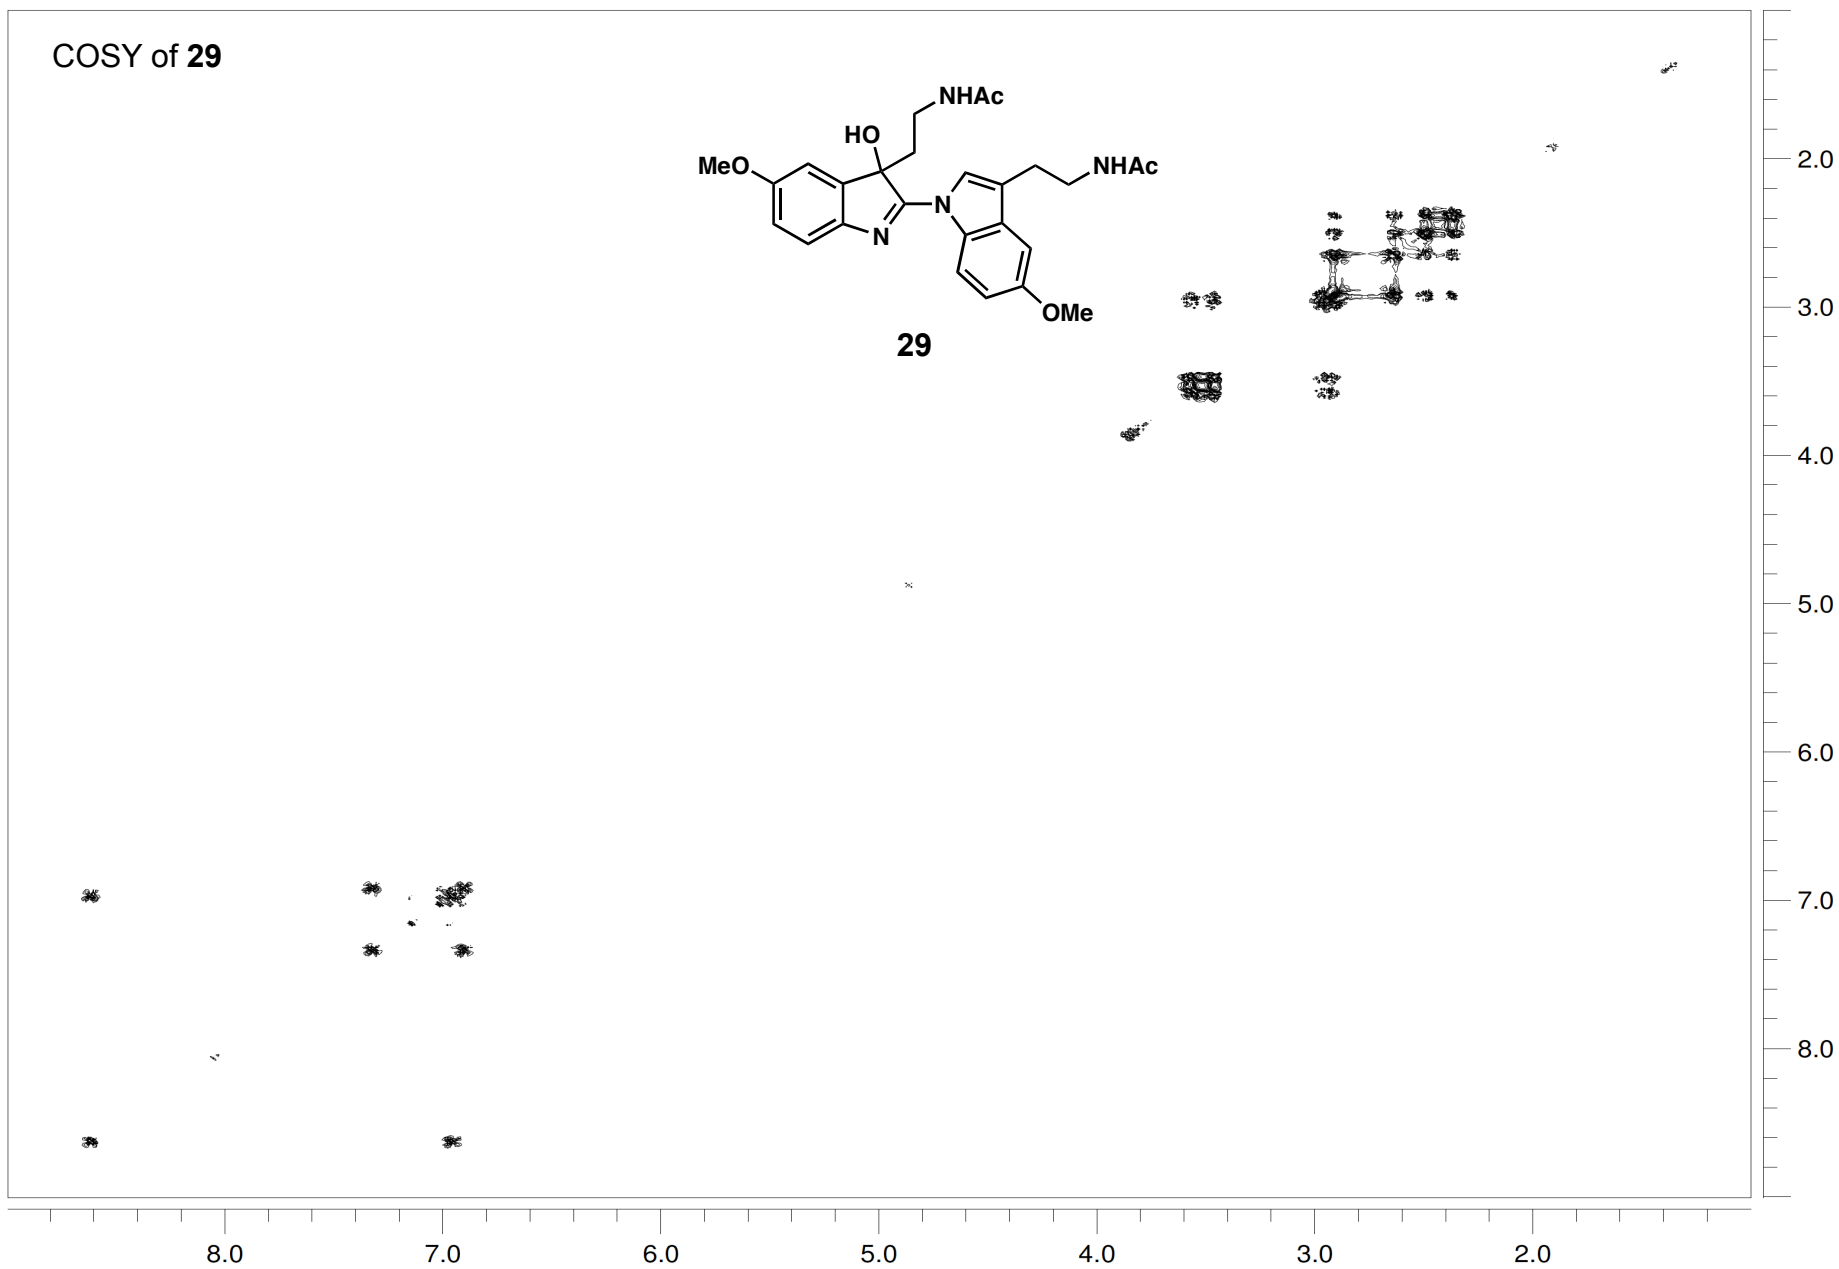



<sup>1</sup>H-NMR of **30**

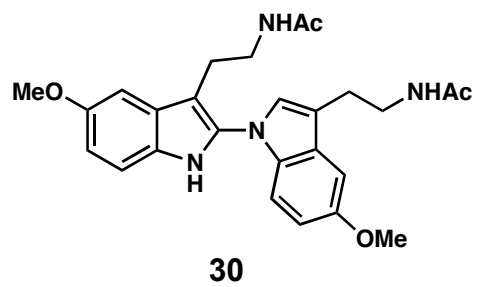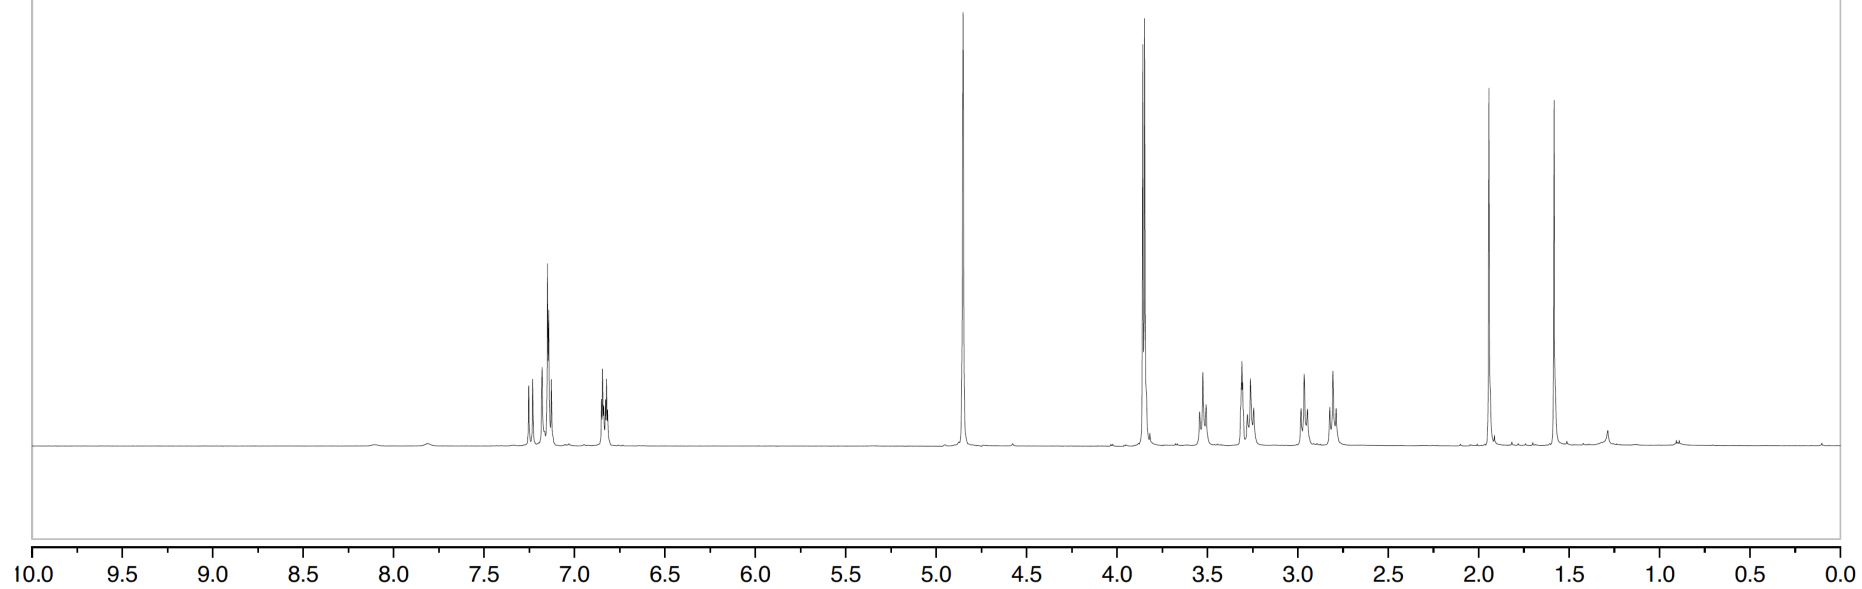

<sup>13</sup>C-NMR of **30**

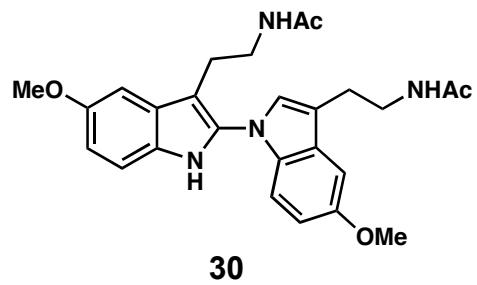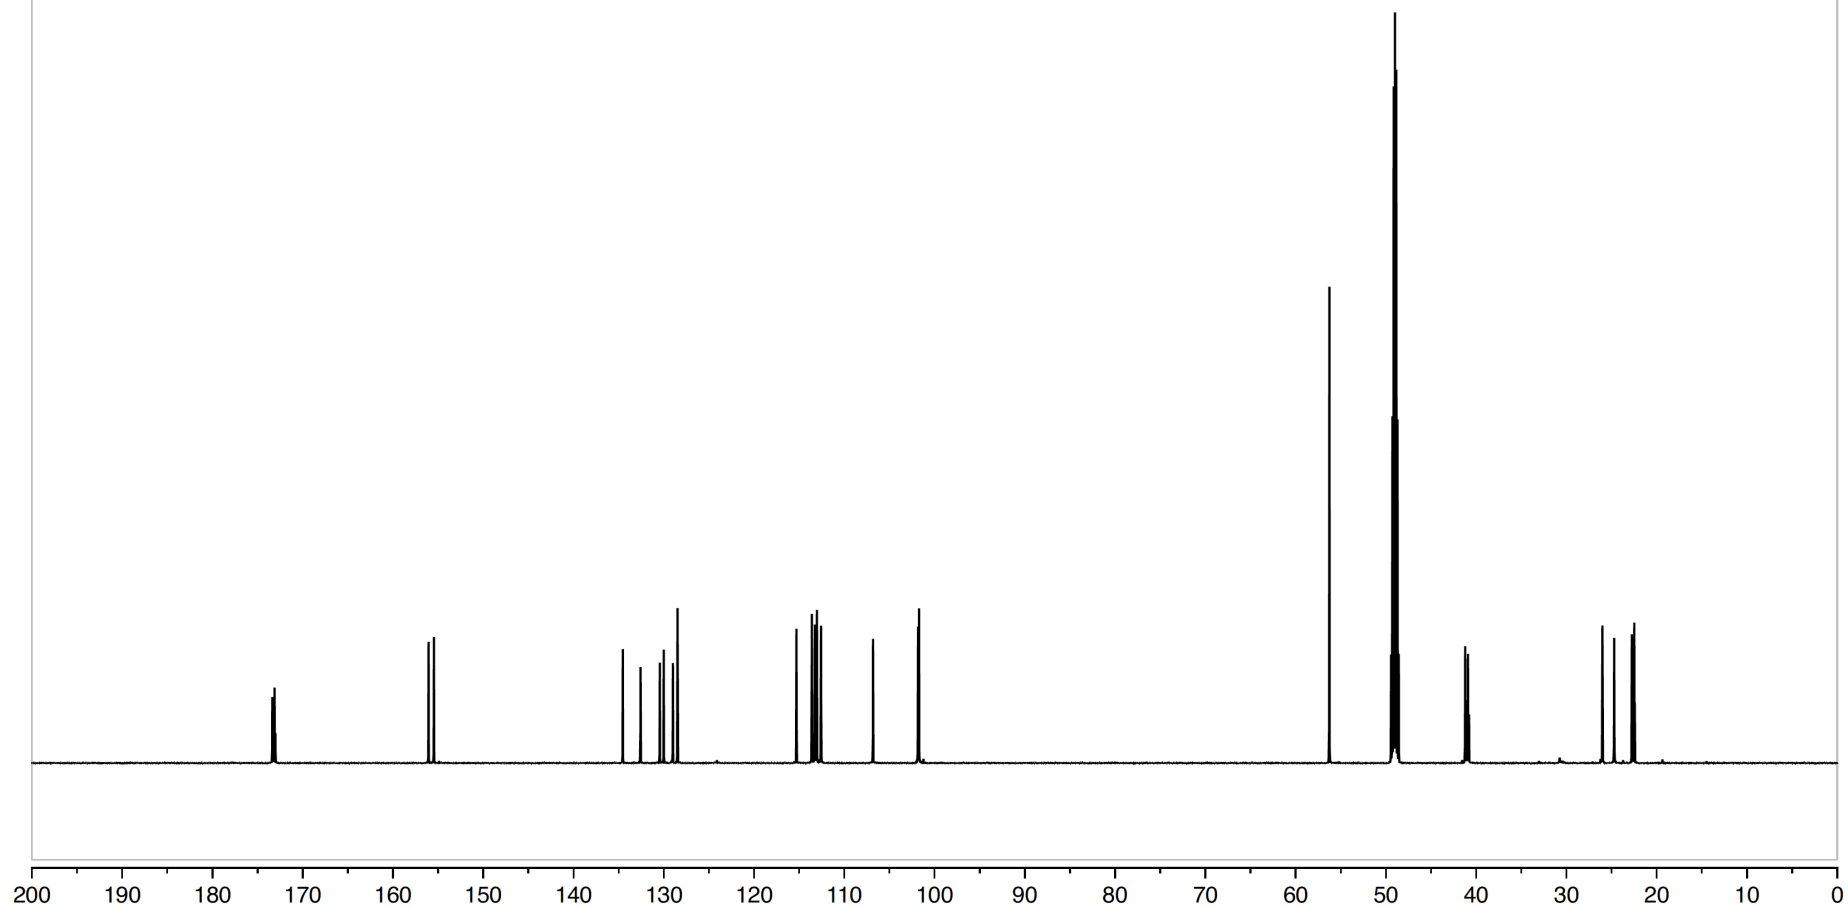

HMQC of 30

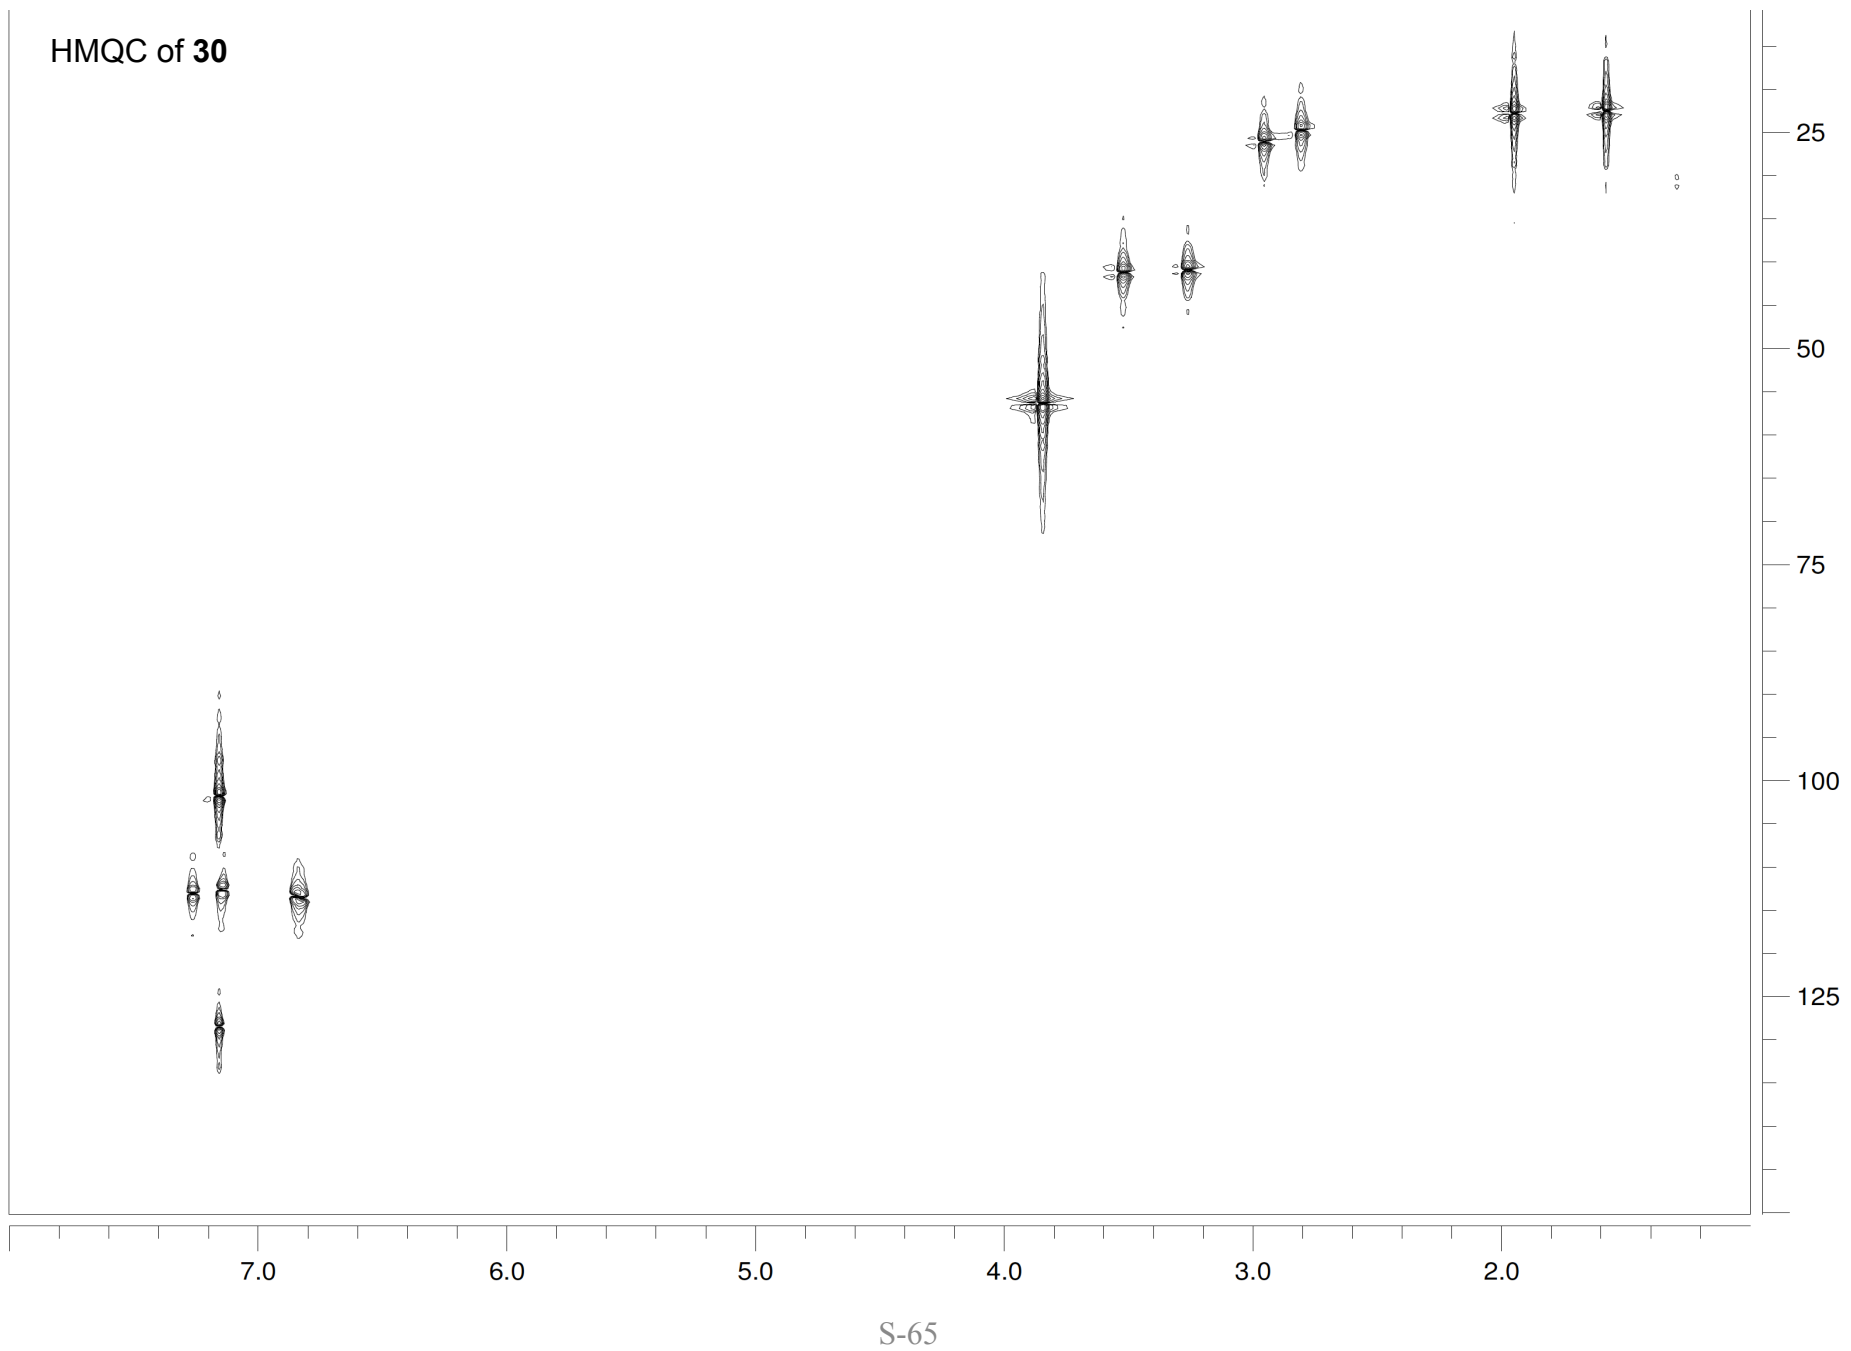

<sup>1</sup>H-NMR of **31a**

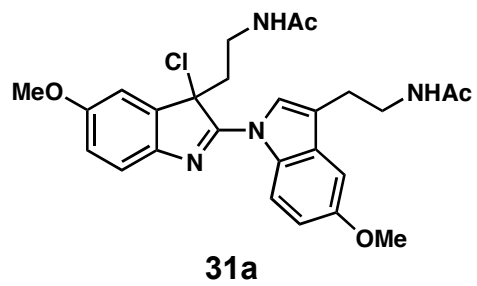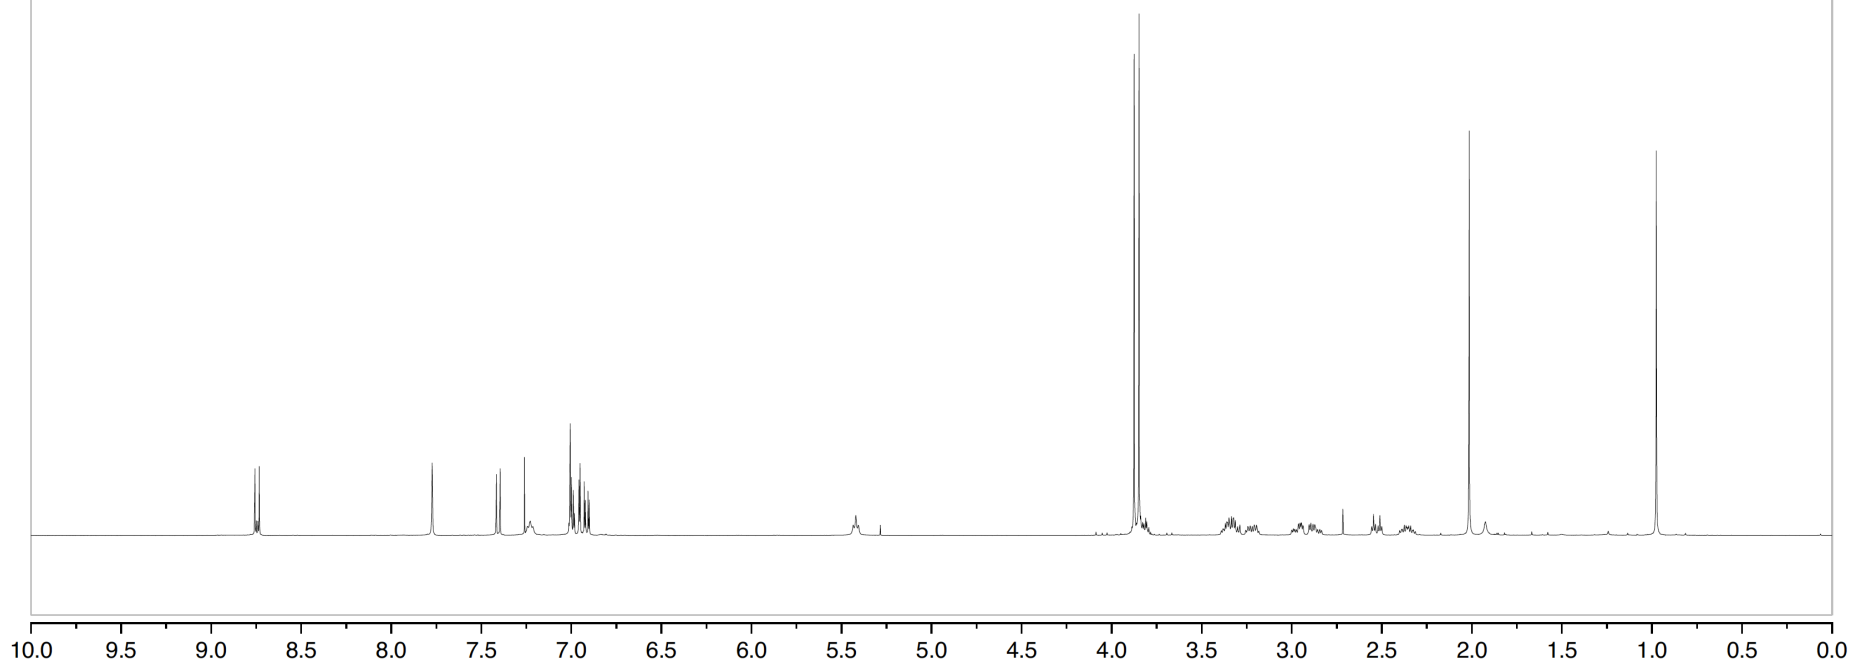

<sup>13</sup>C-NMR of **31a**

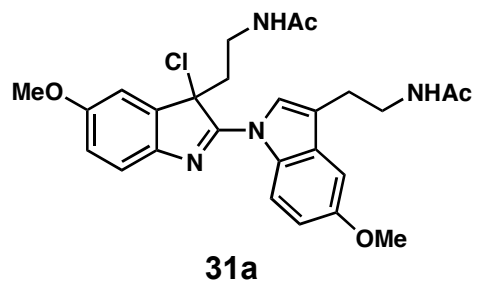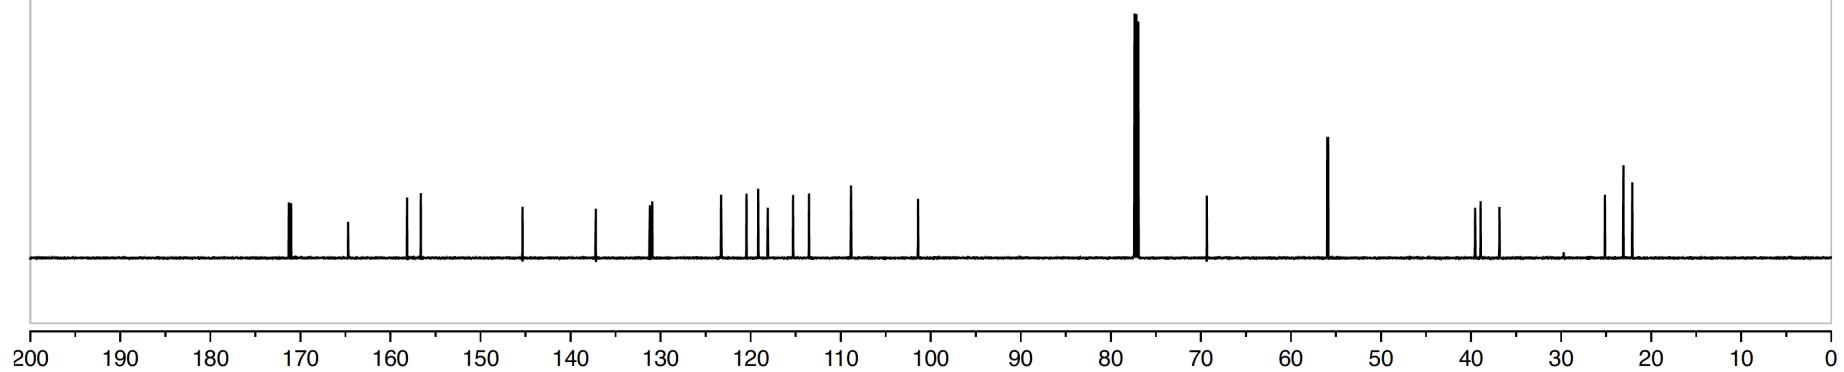

HMQC of 31a

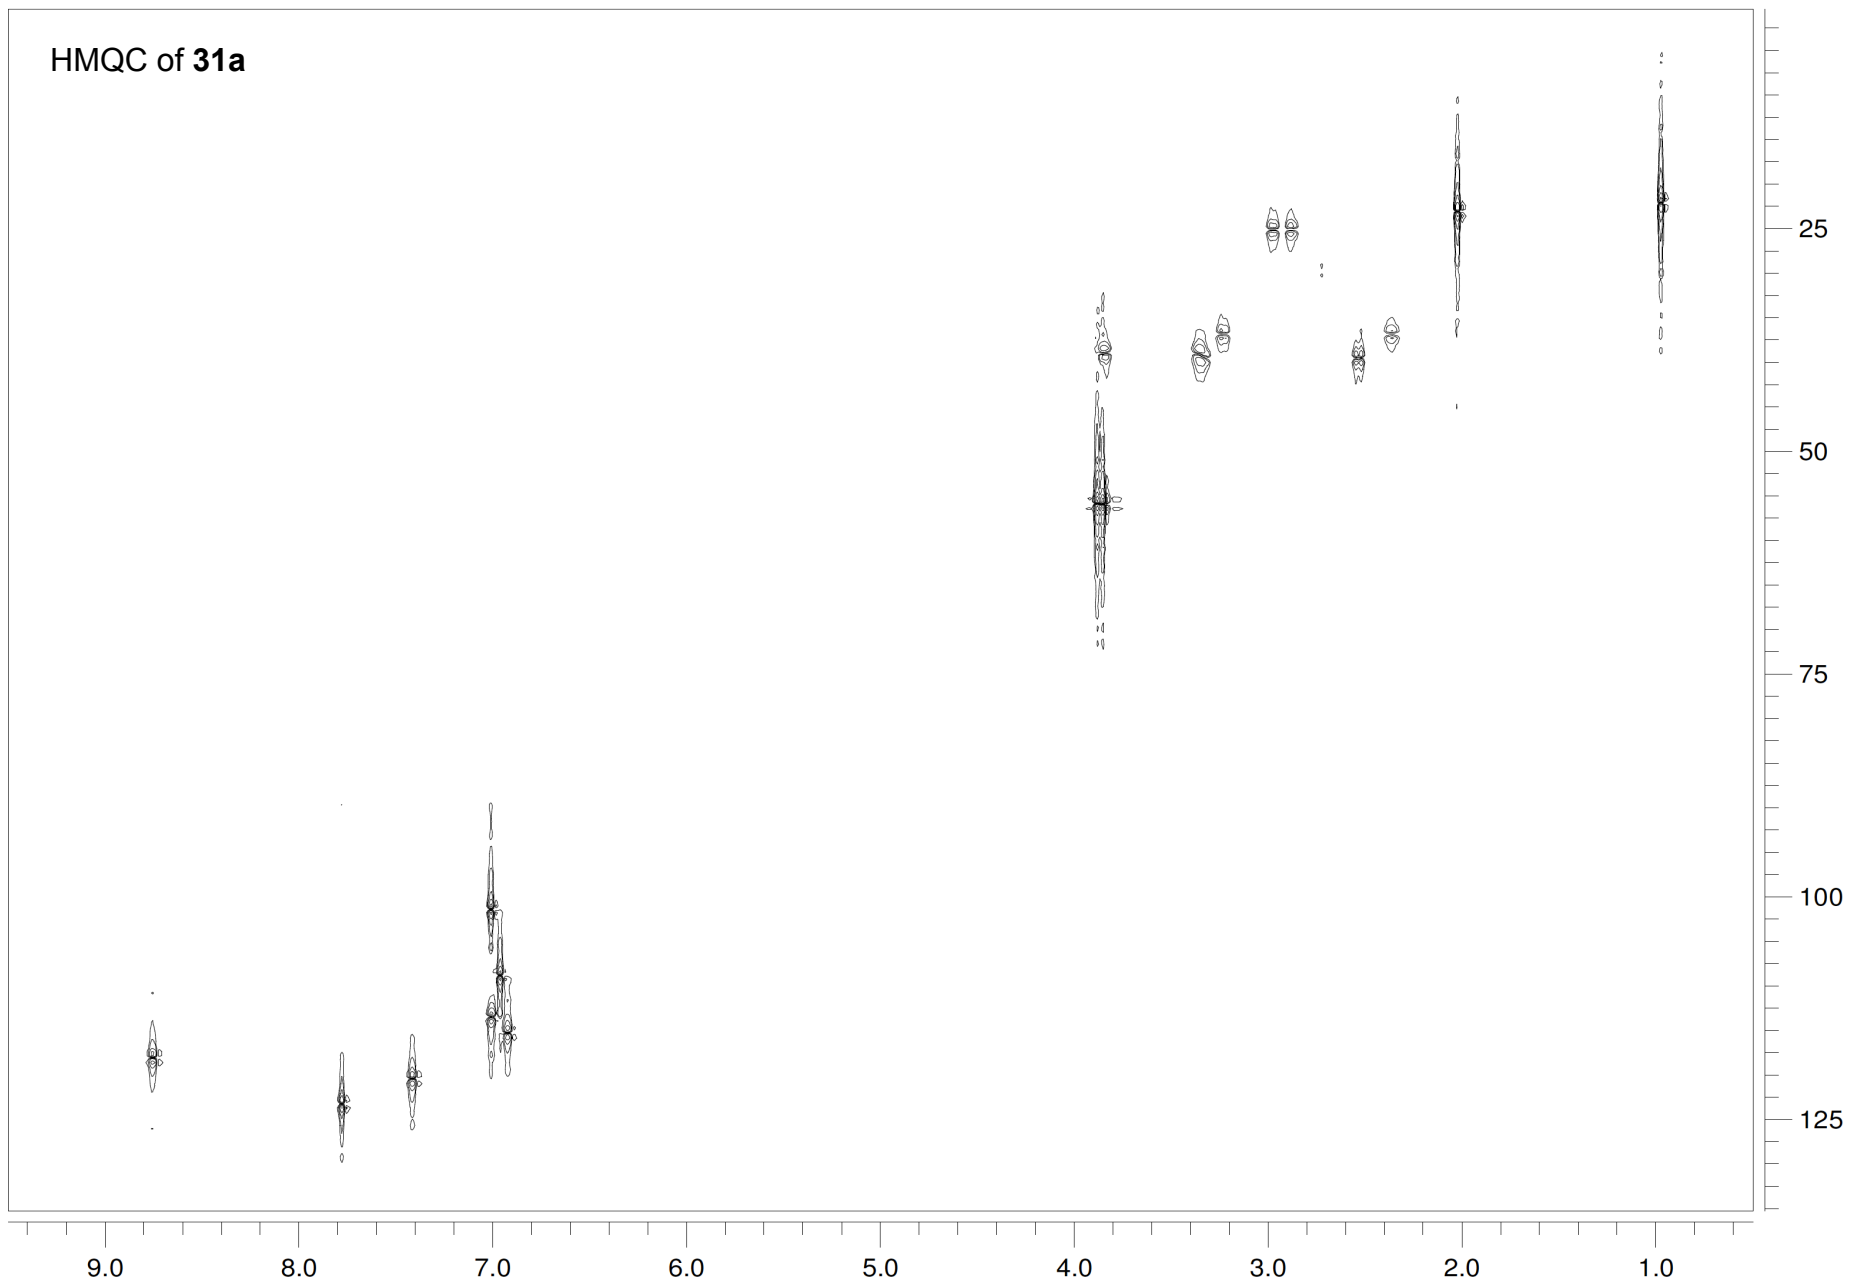

HMBC of **31a**

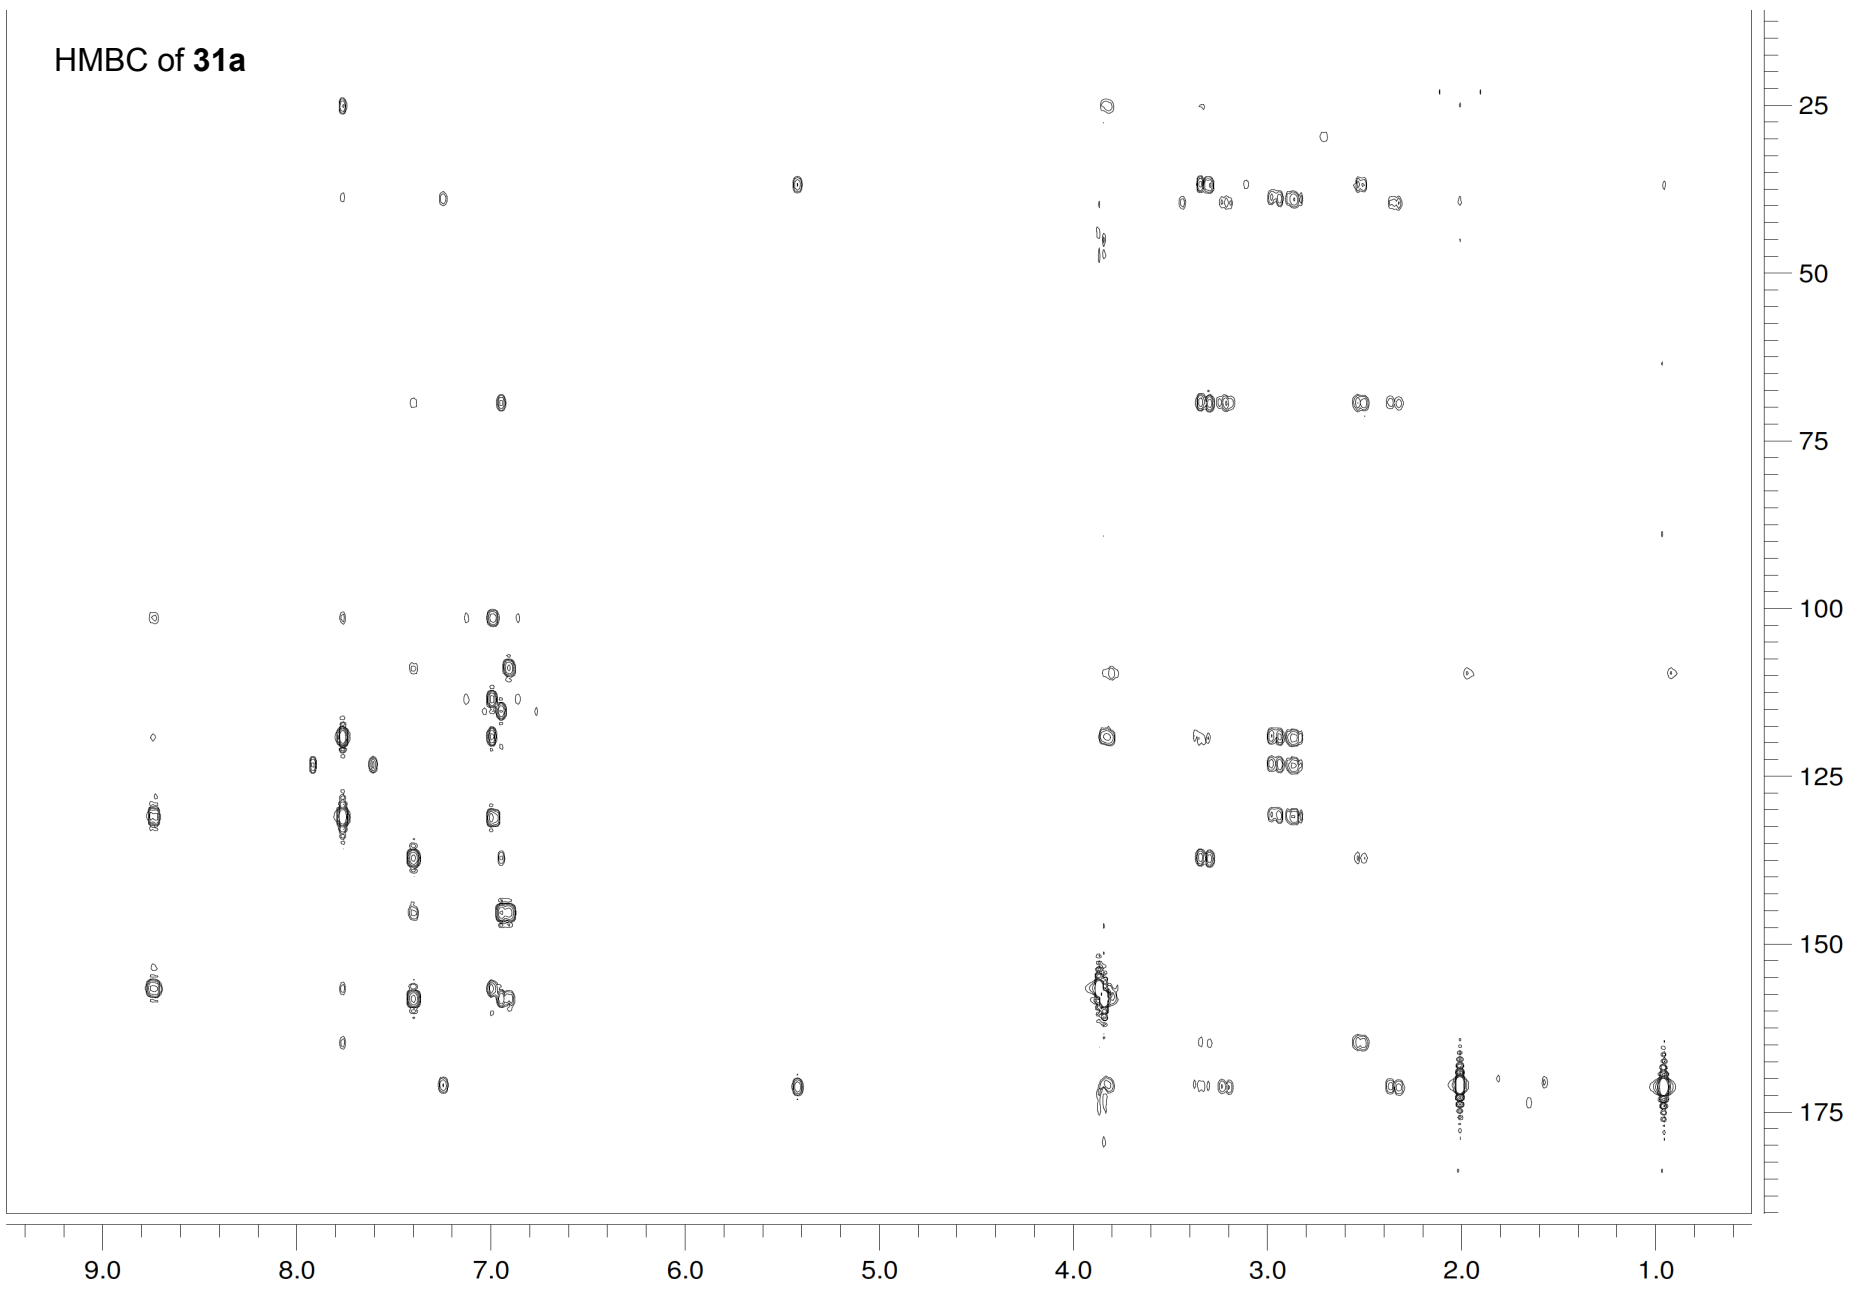

<sup>1</sup>H-NMR of **31b**

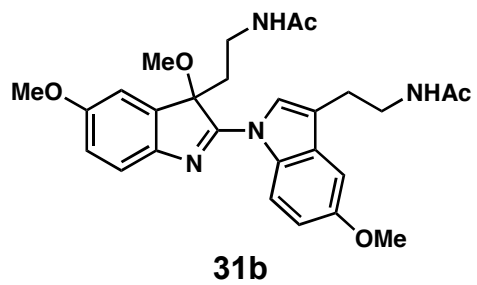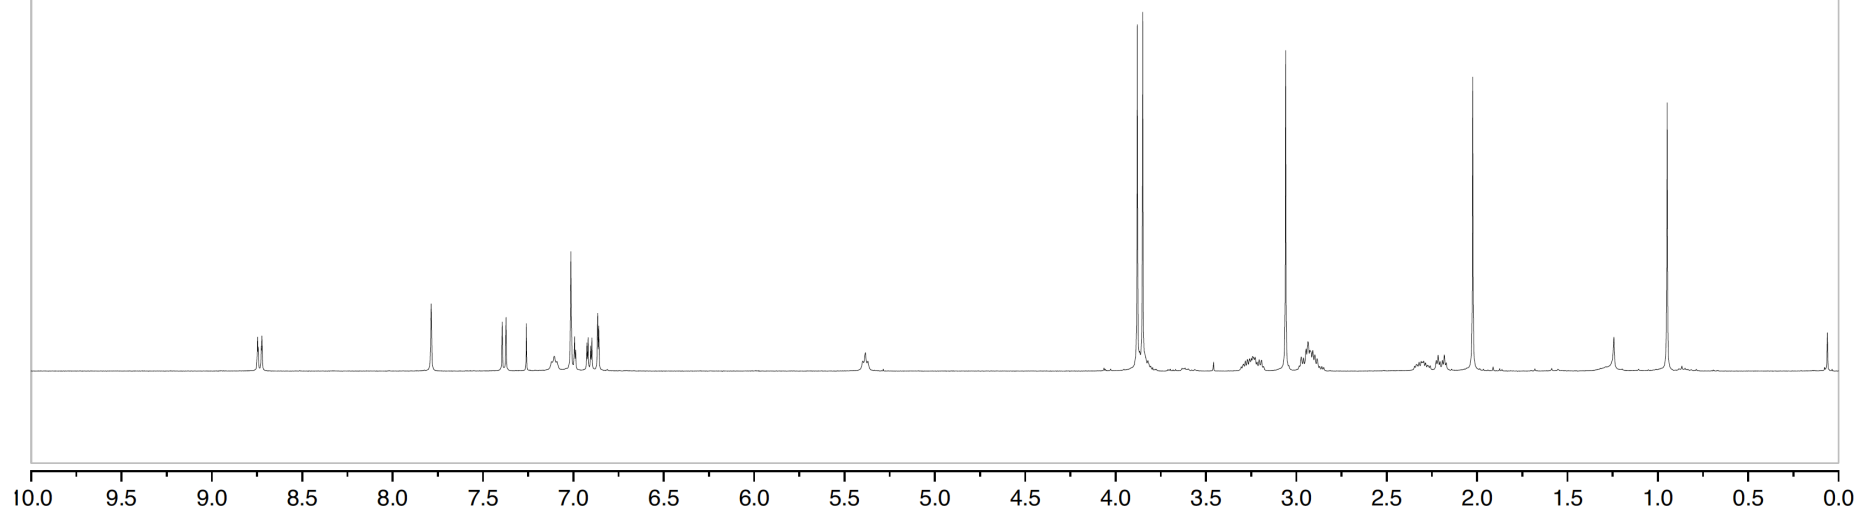



<sup>13</sup>C-NMR of **31b**

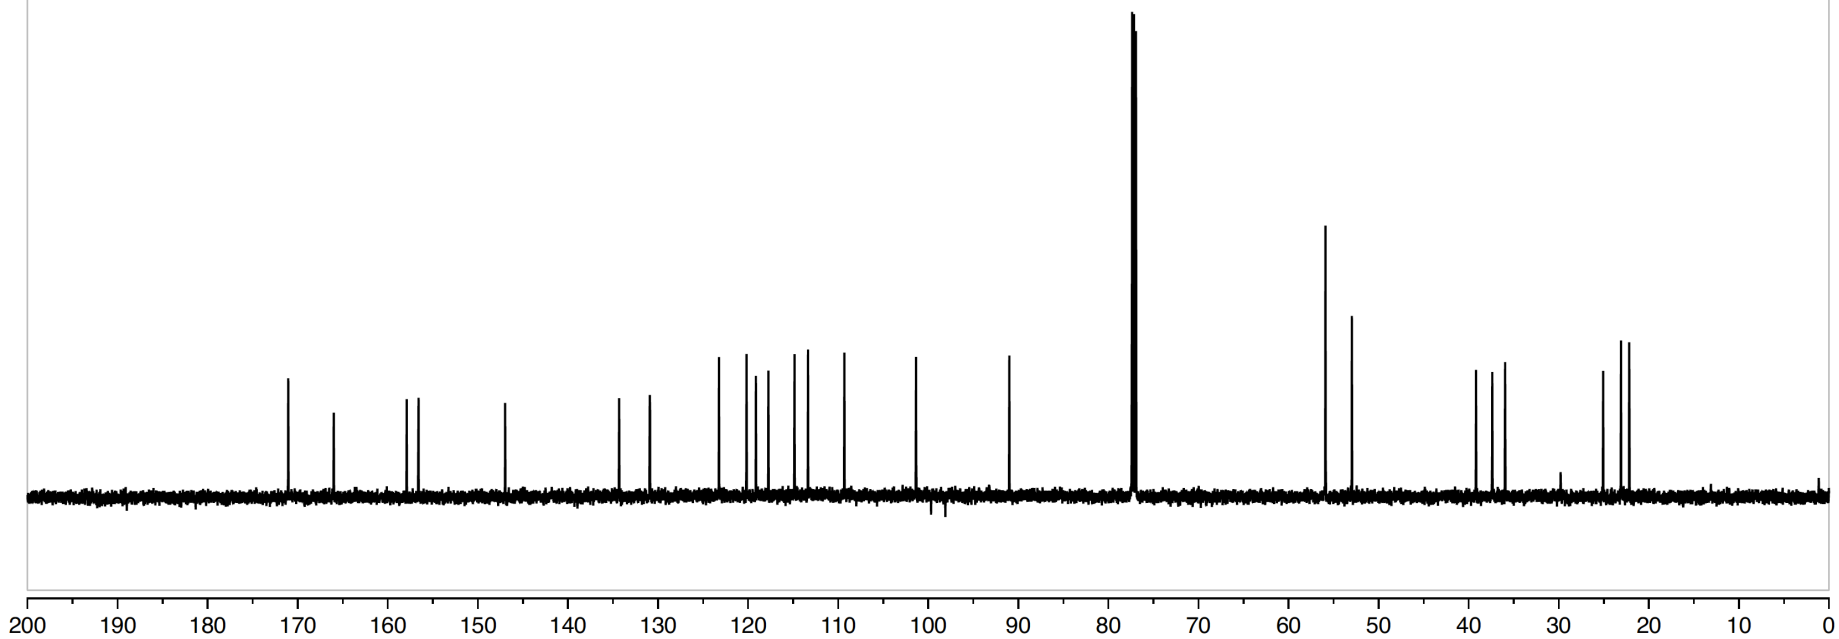

HMQC of **31b**

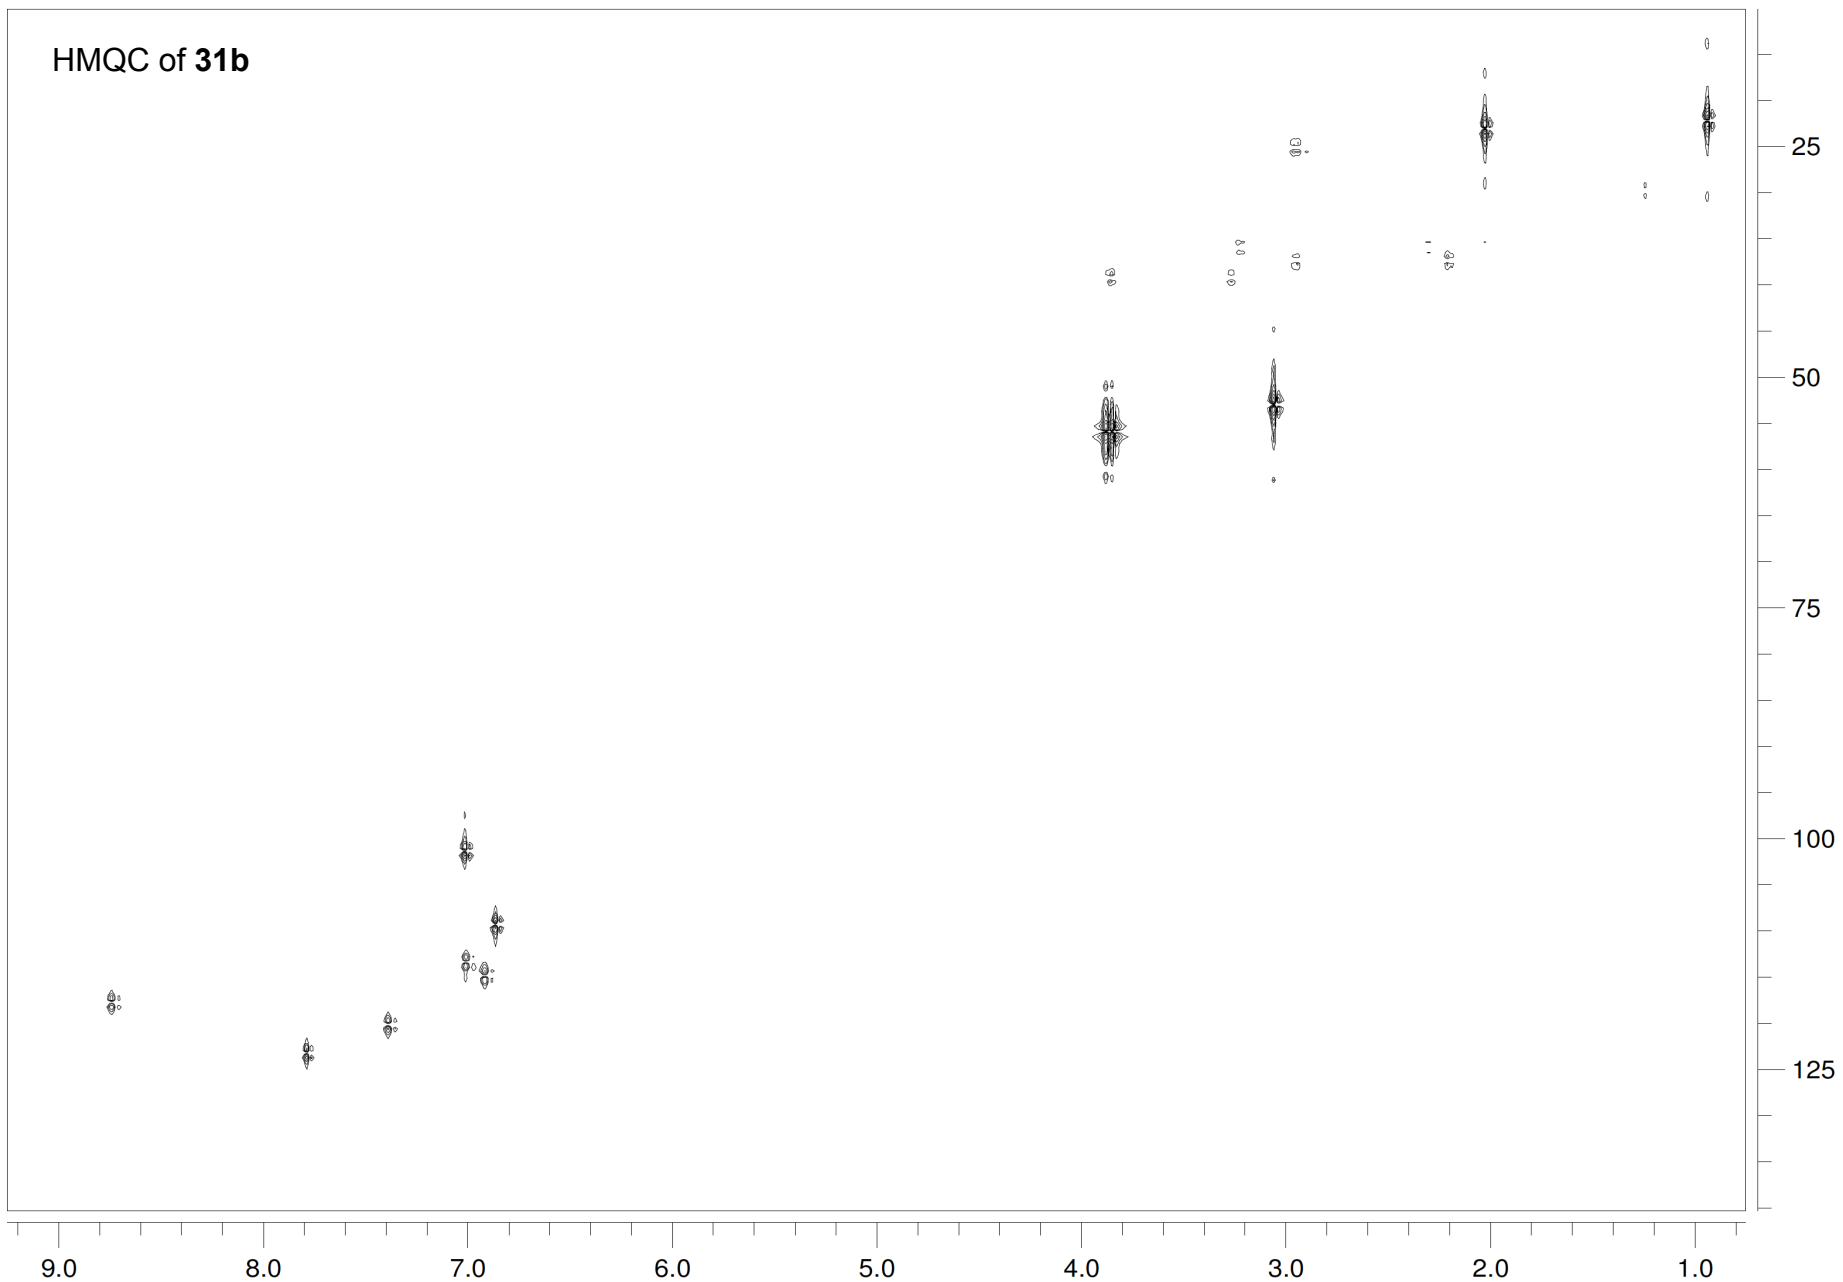

<sup>1</sup>H-NMR of **34**

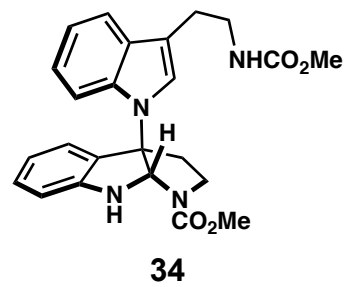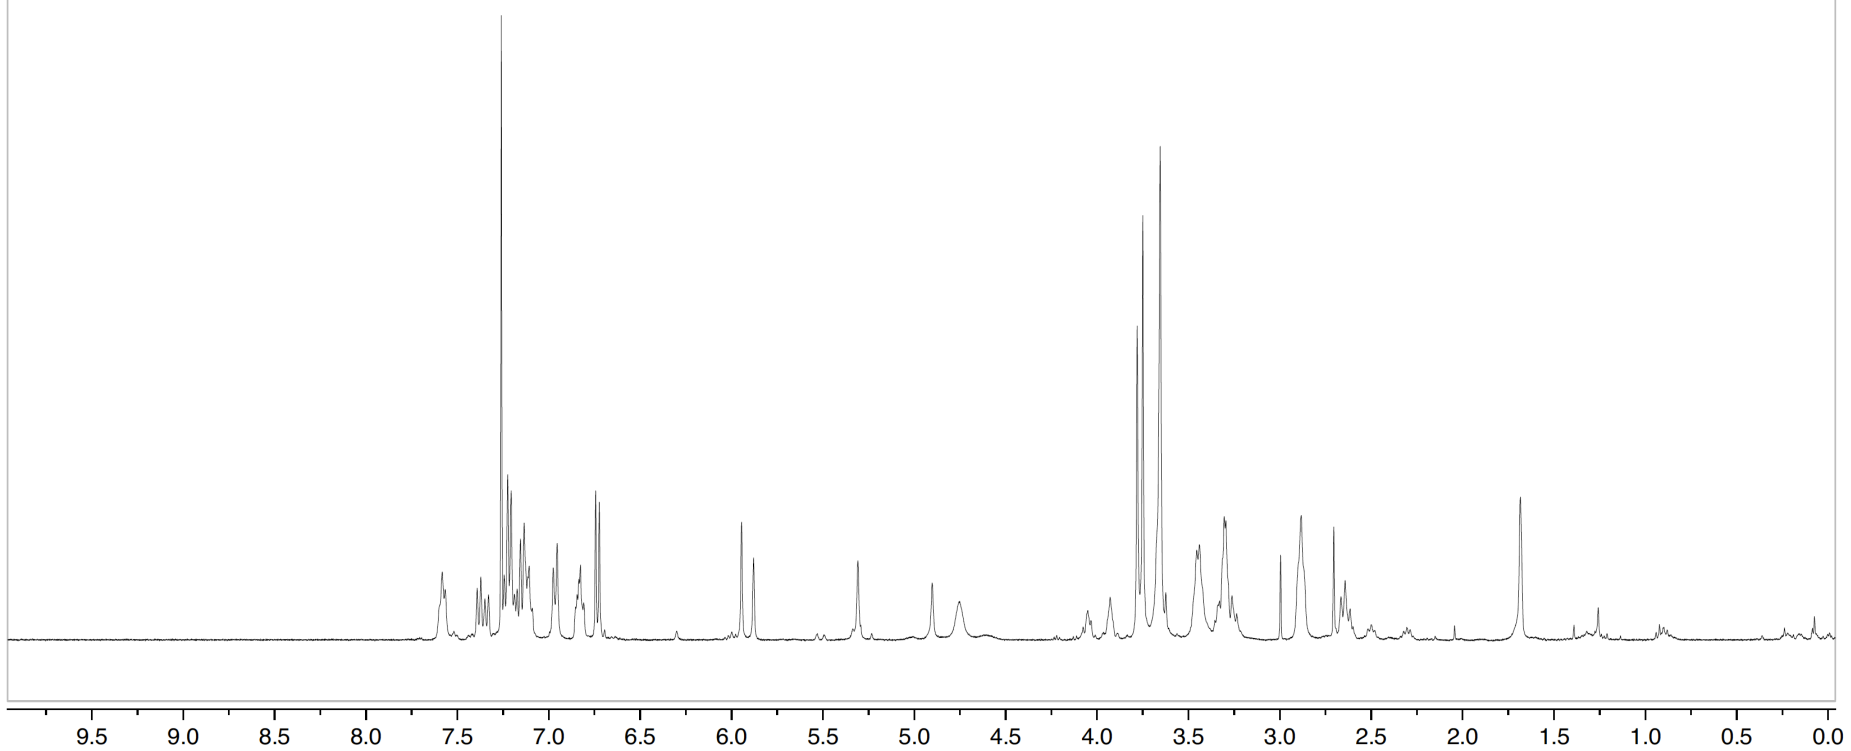

<sup>13</sup>C-NMR of **34**

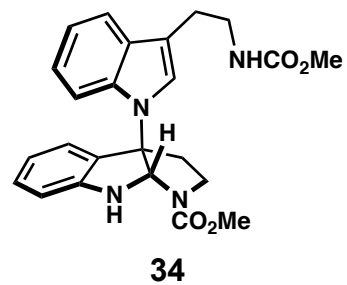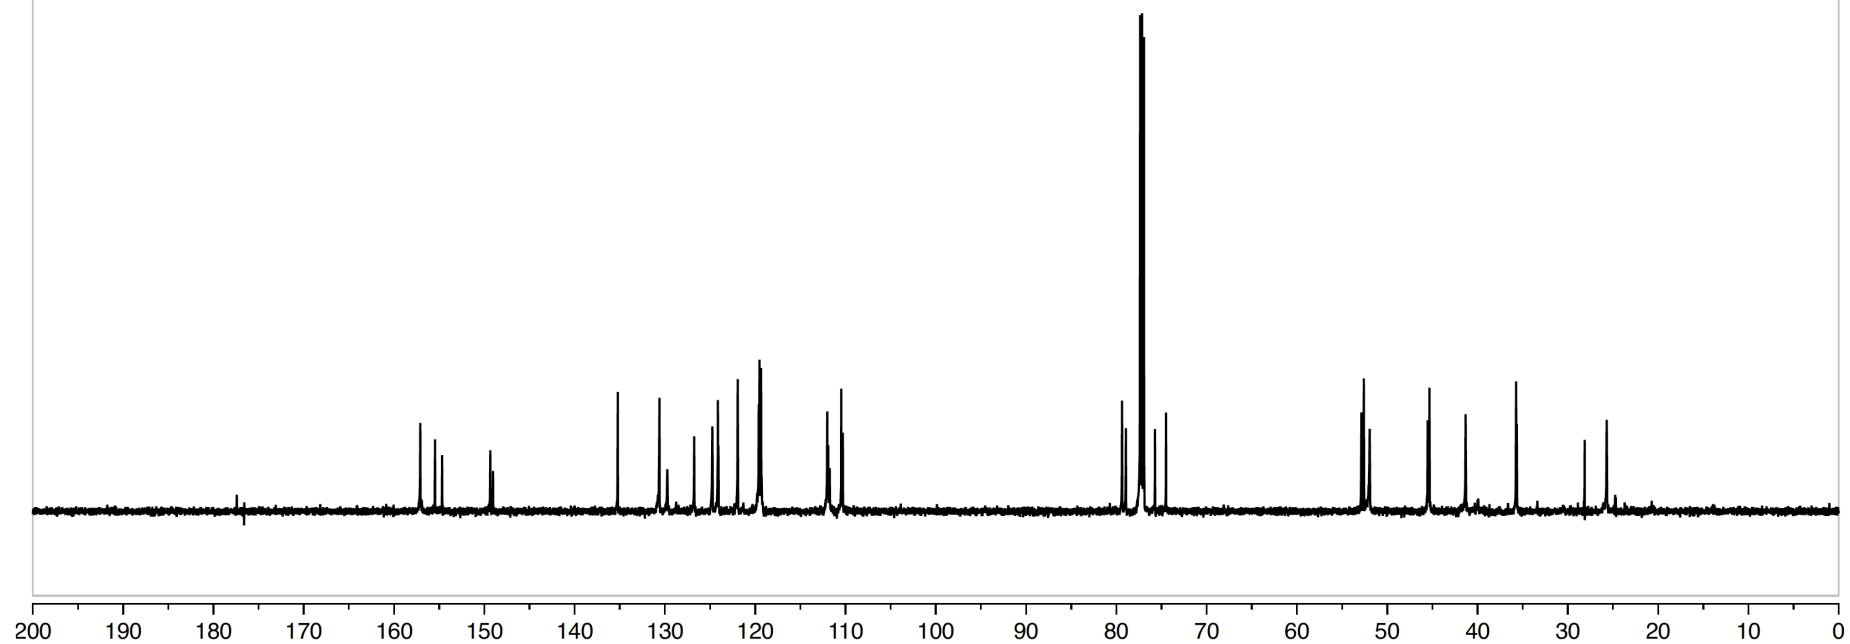

HMQC of **34**

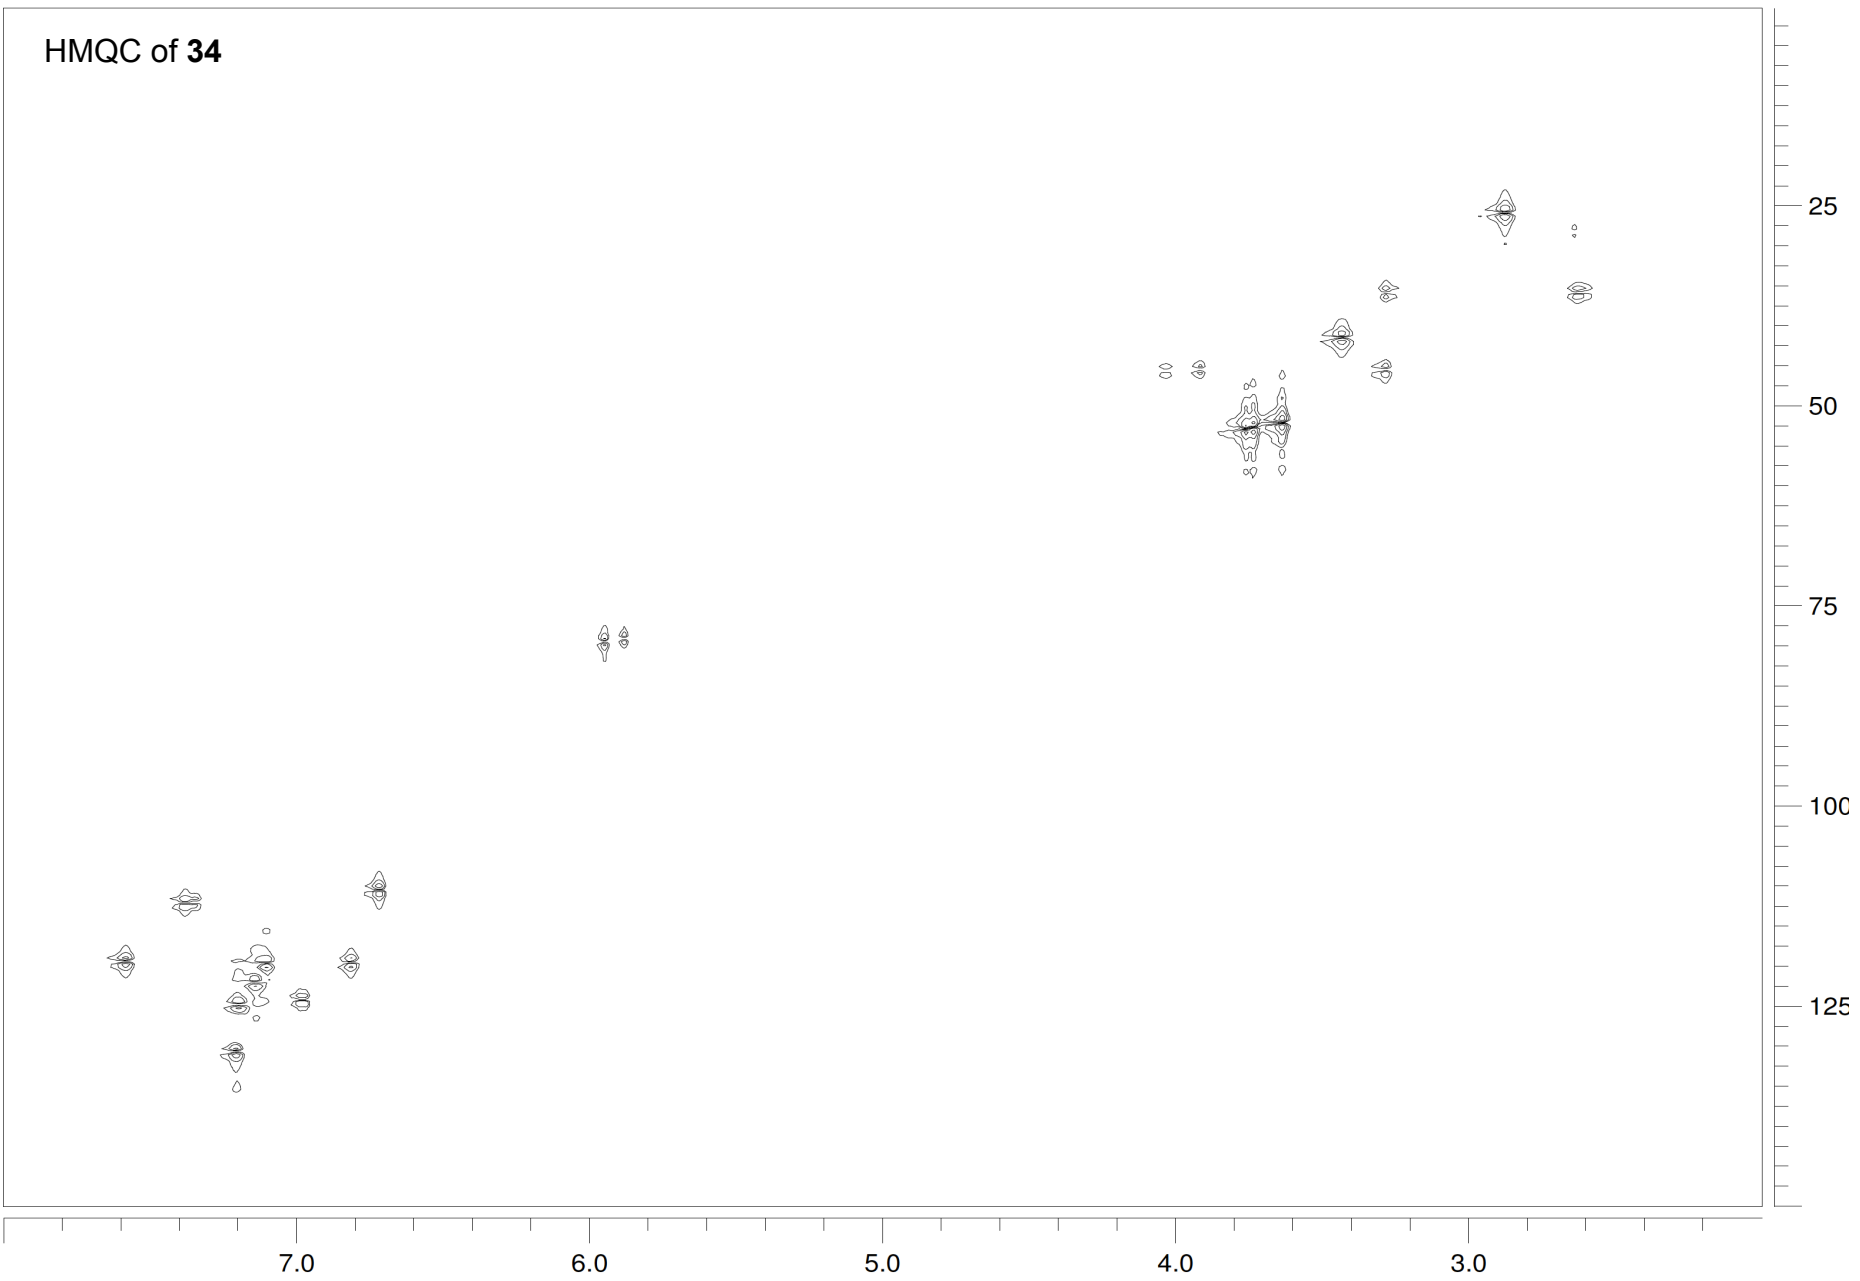

S-75

<sup>1</sup>H-NMR of **SI-1**

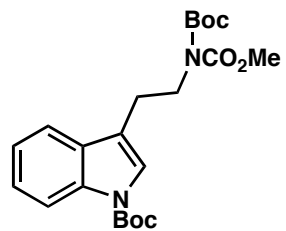

**SI-1**

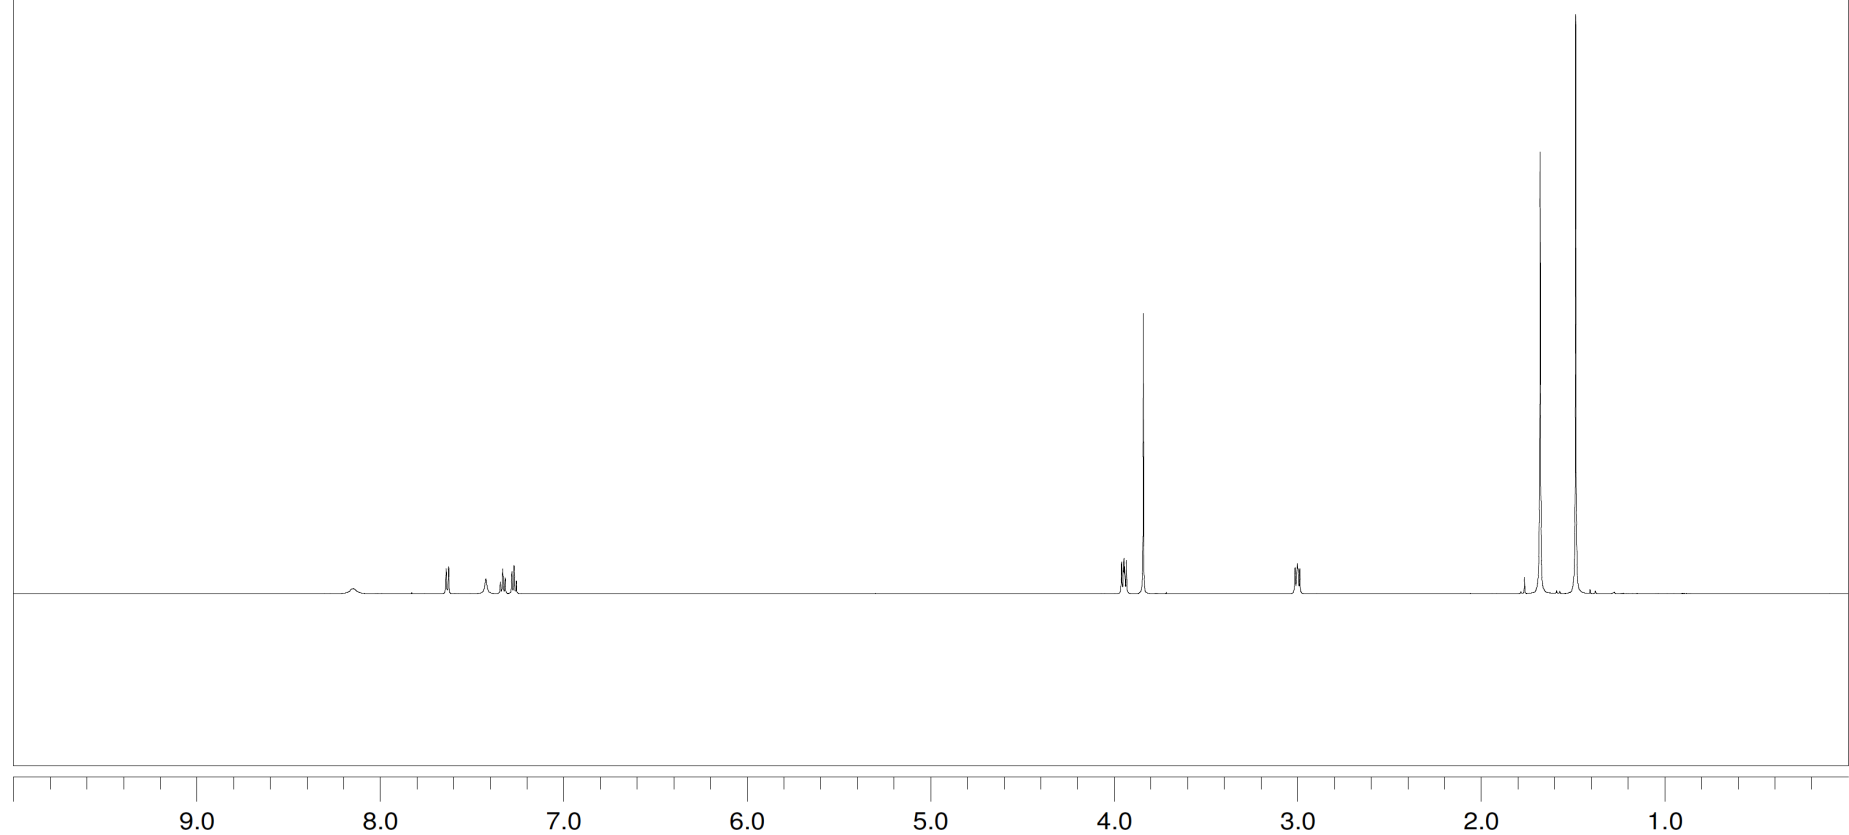

<sup>13</sup>C-NMR of **SI-1**



**SI-1**

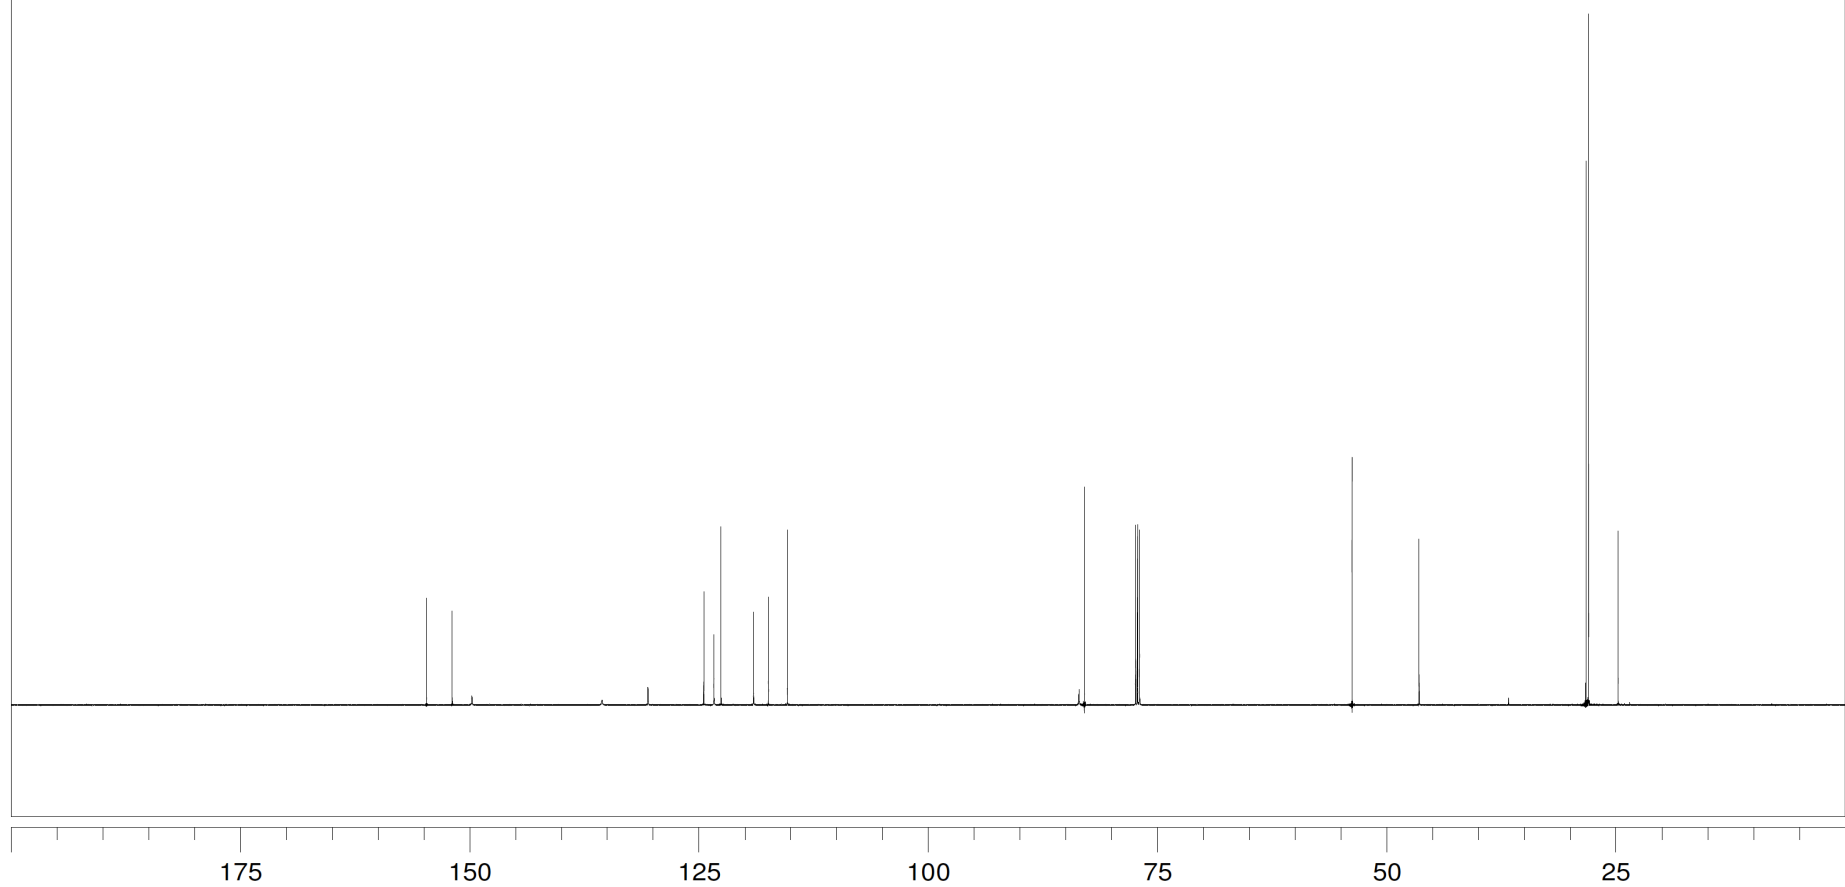

<sup>1</sup>H-NMR of **37**

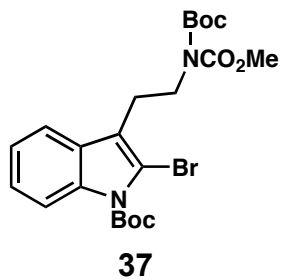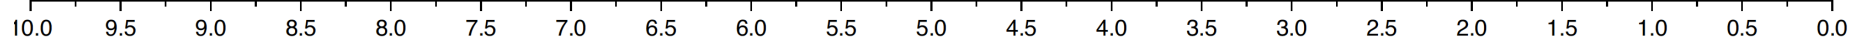



<sup>13</sup>C-NMR of **37**

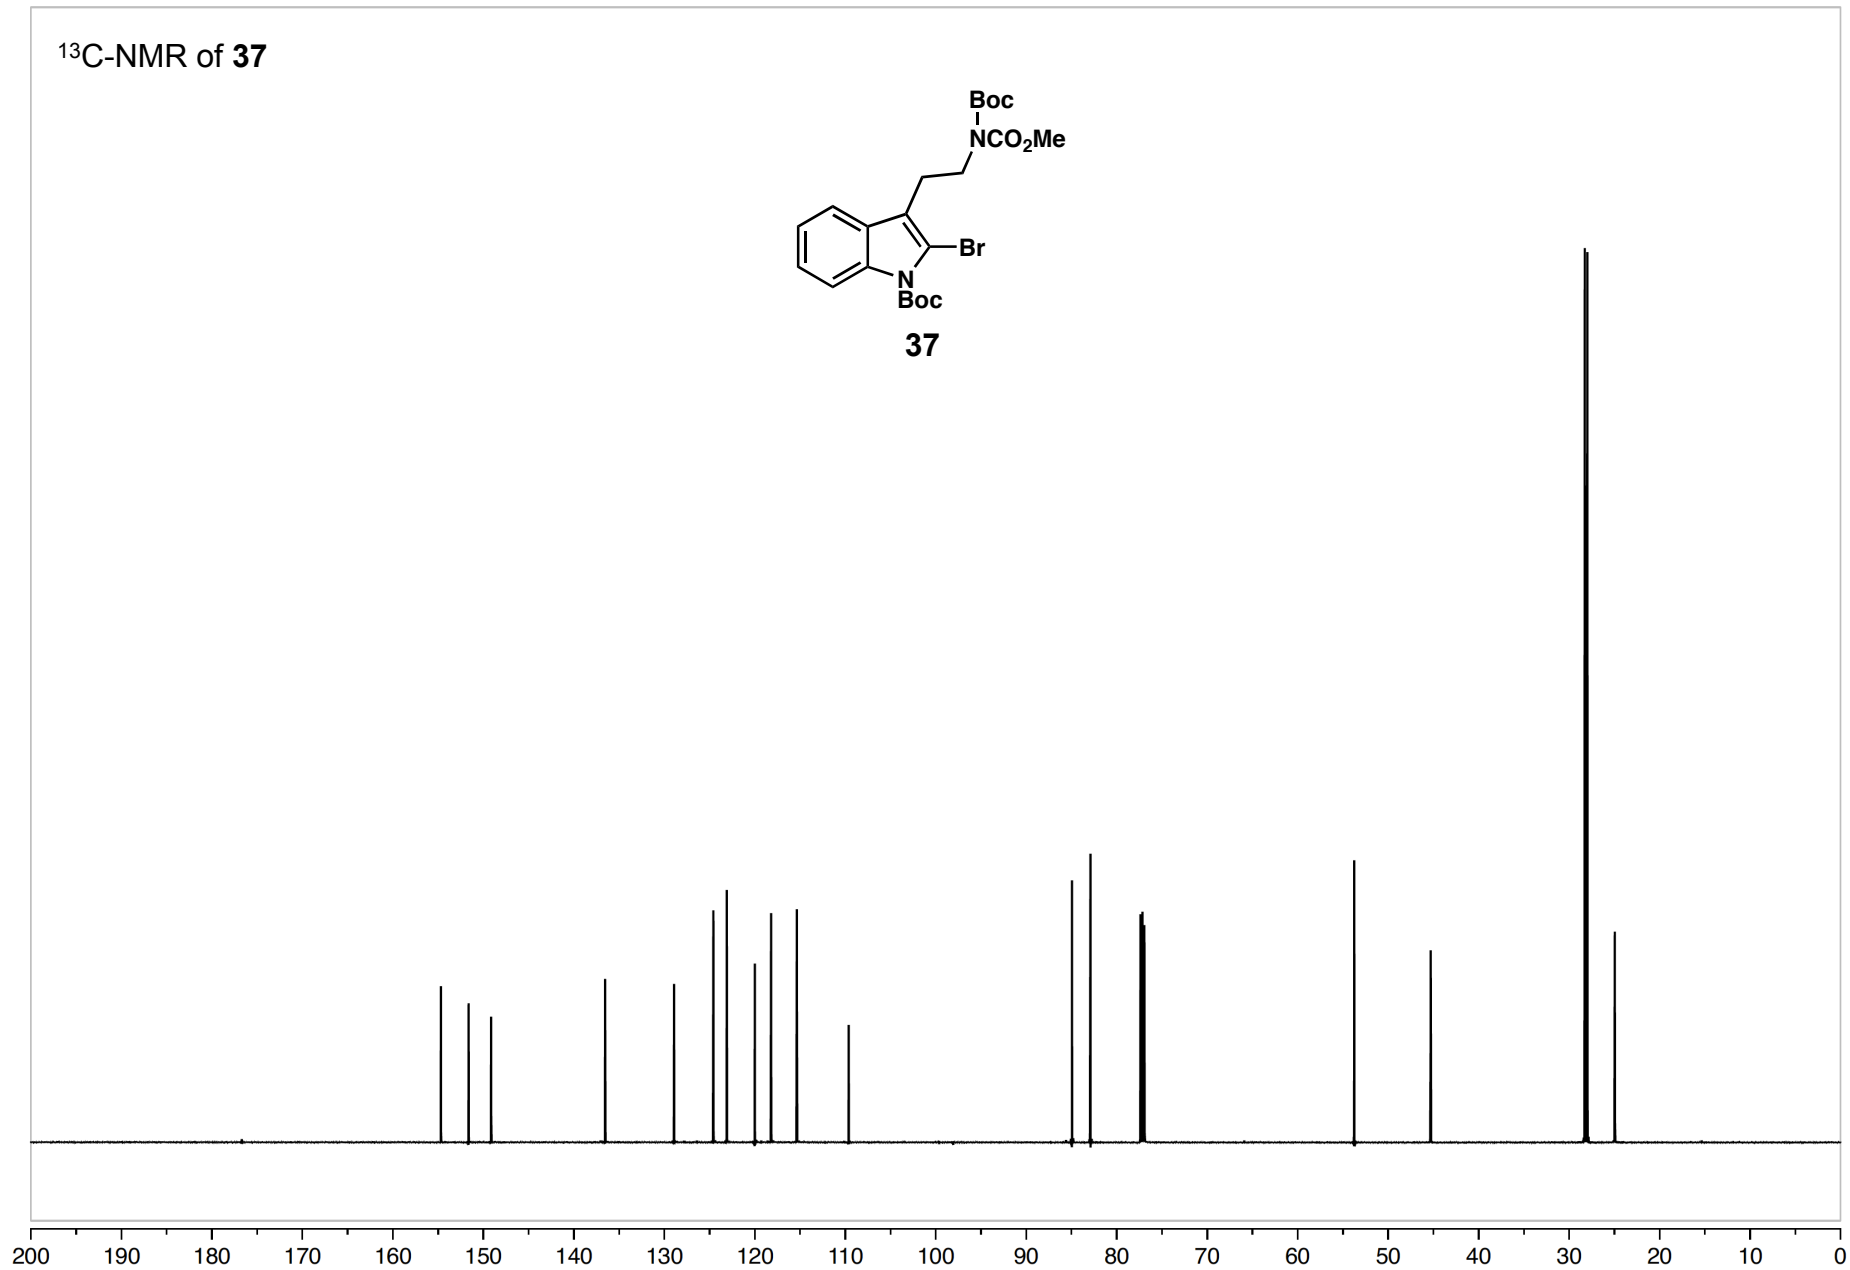

<sup>1</sup>H-NMR of **39**

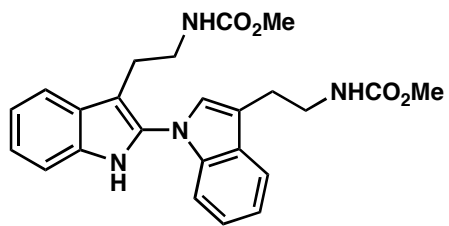

**39**

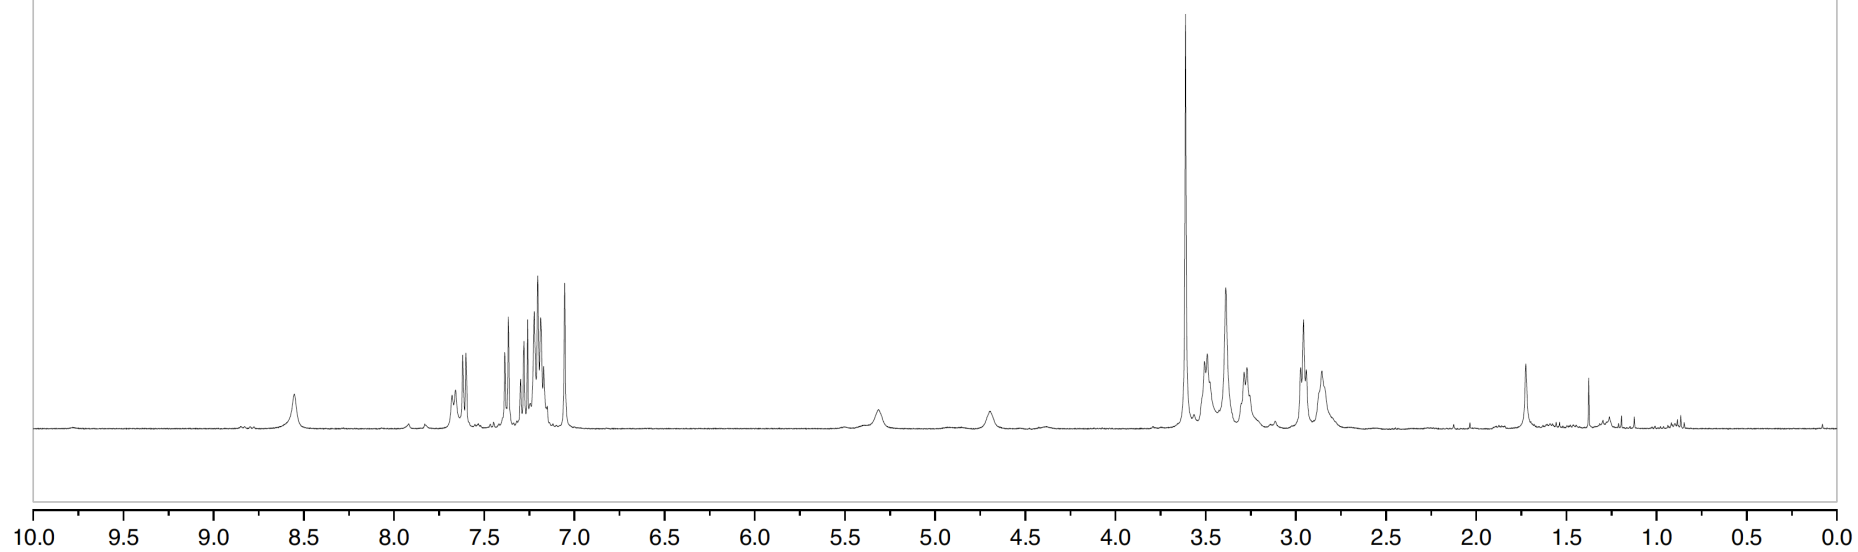

<sup>13</sup>C-NMR of **39**

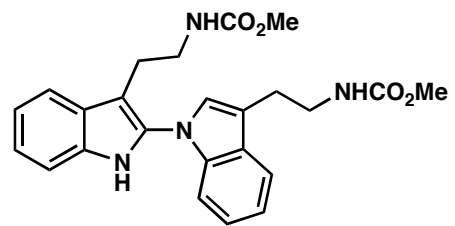

**39**

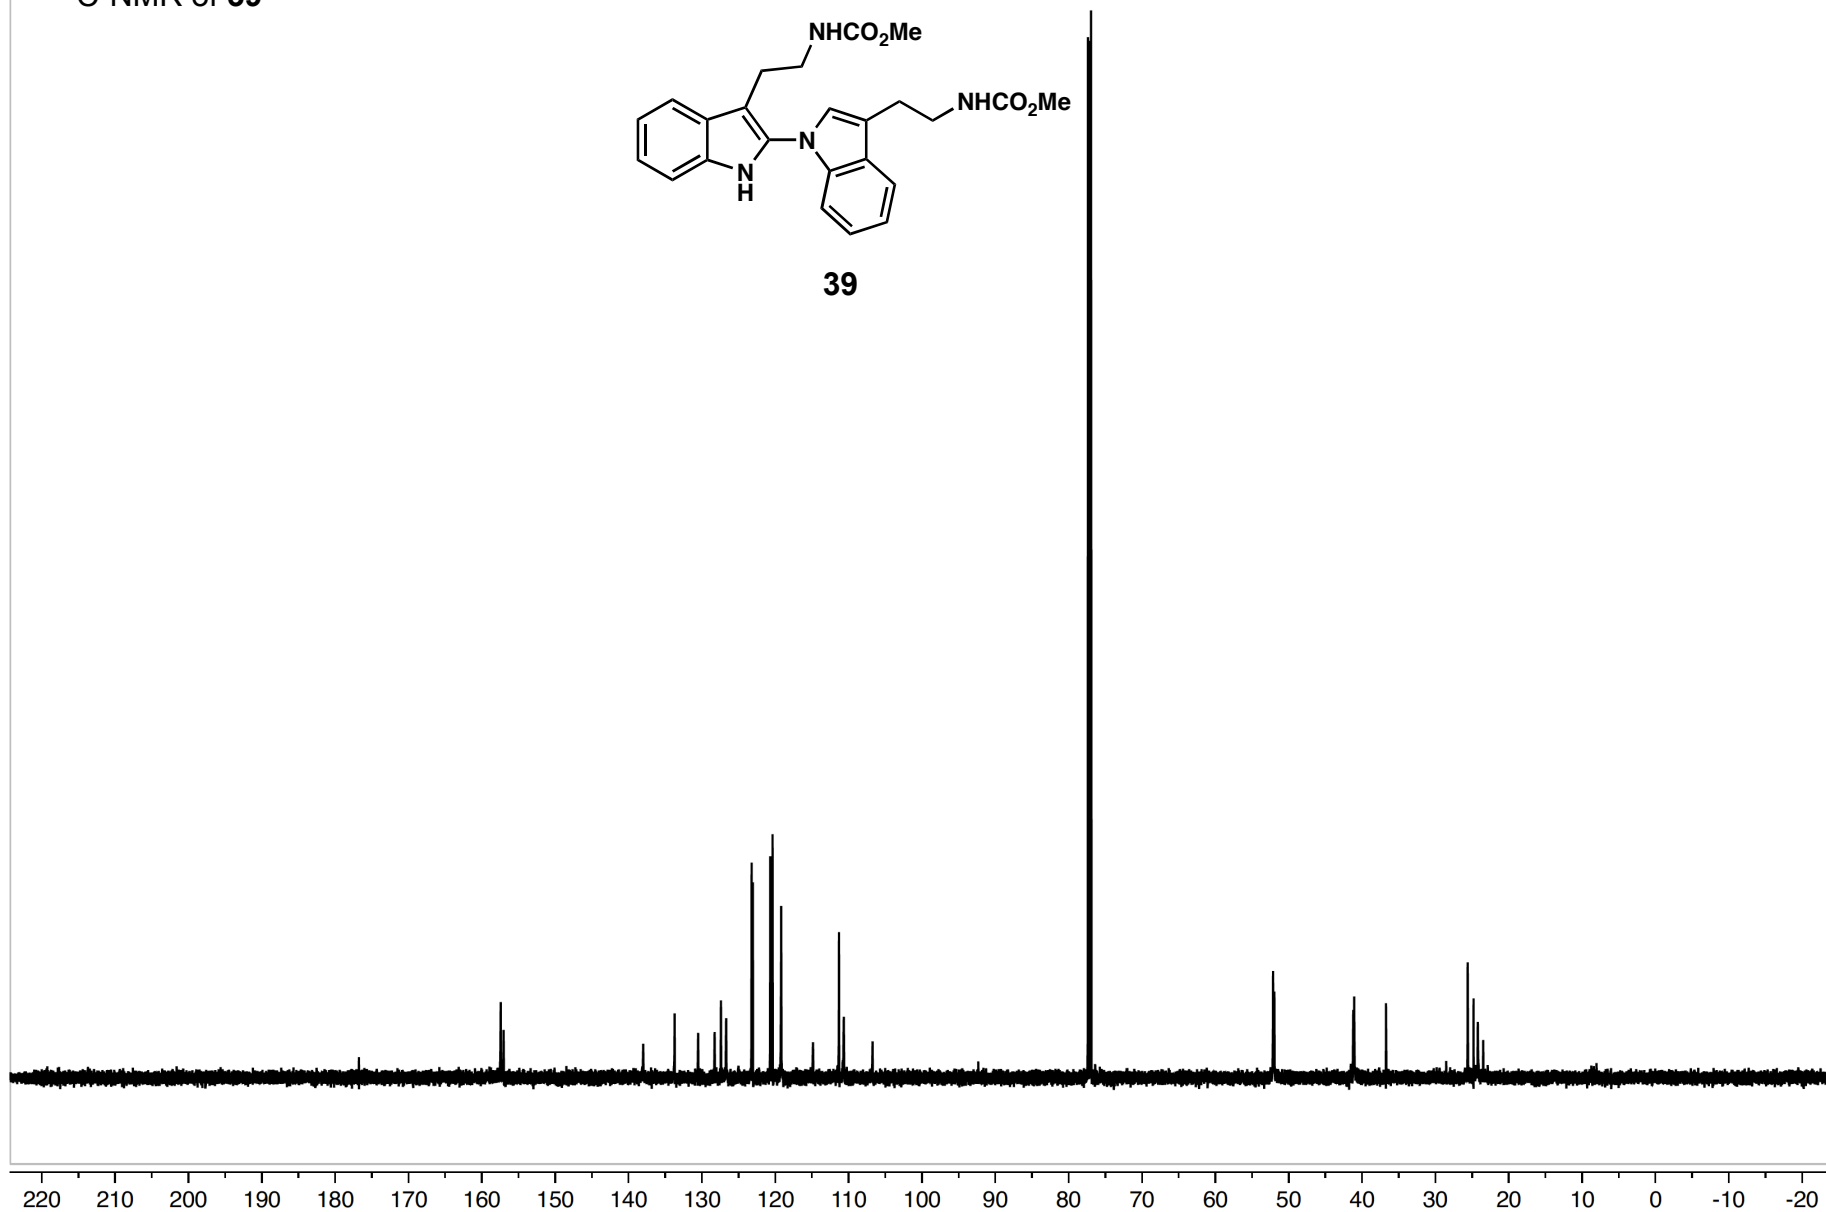

HMQC of **39**

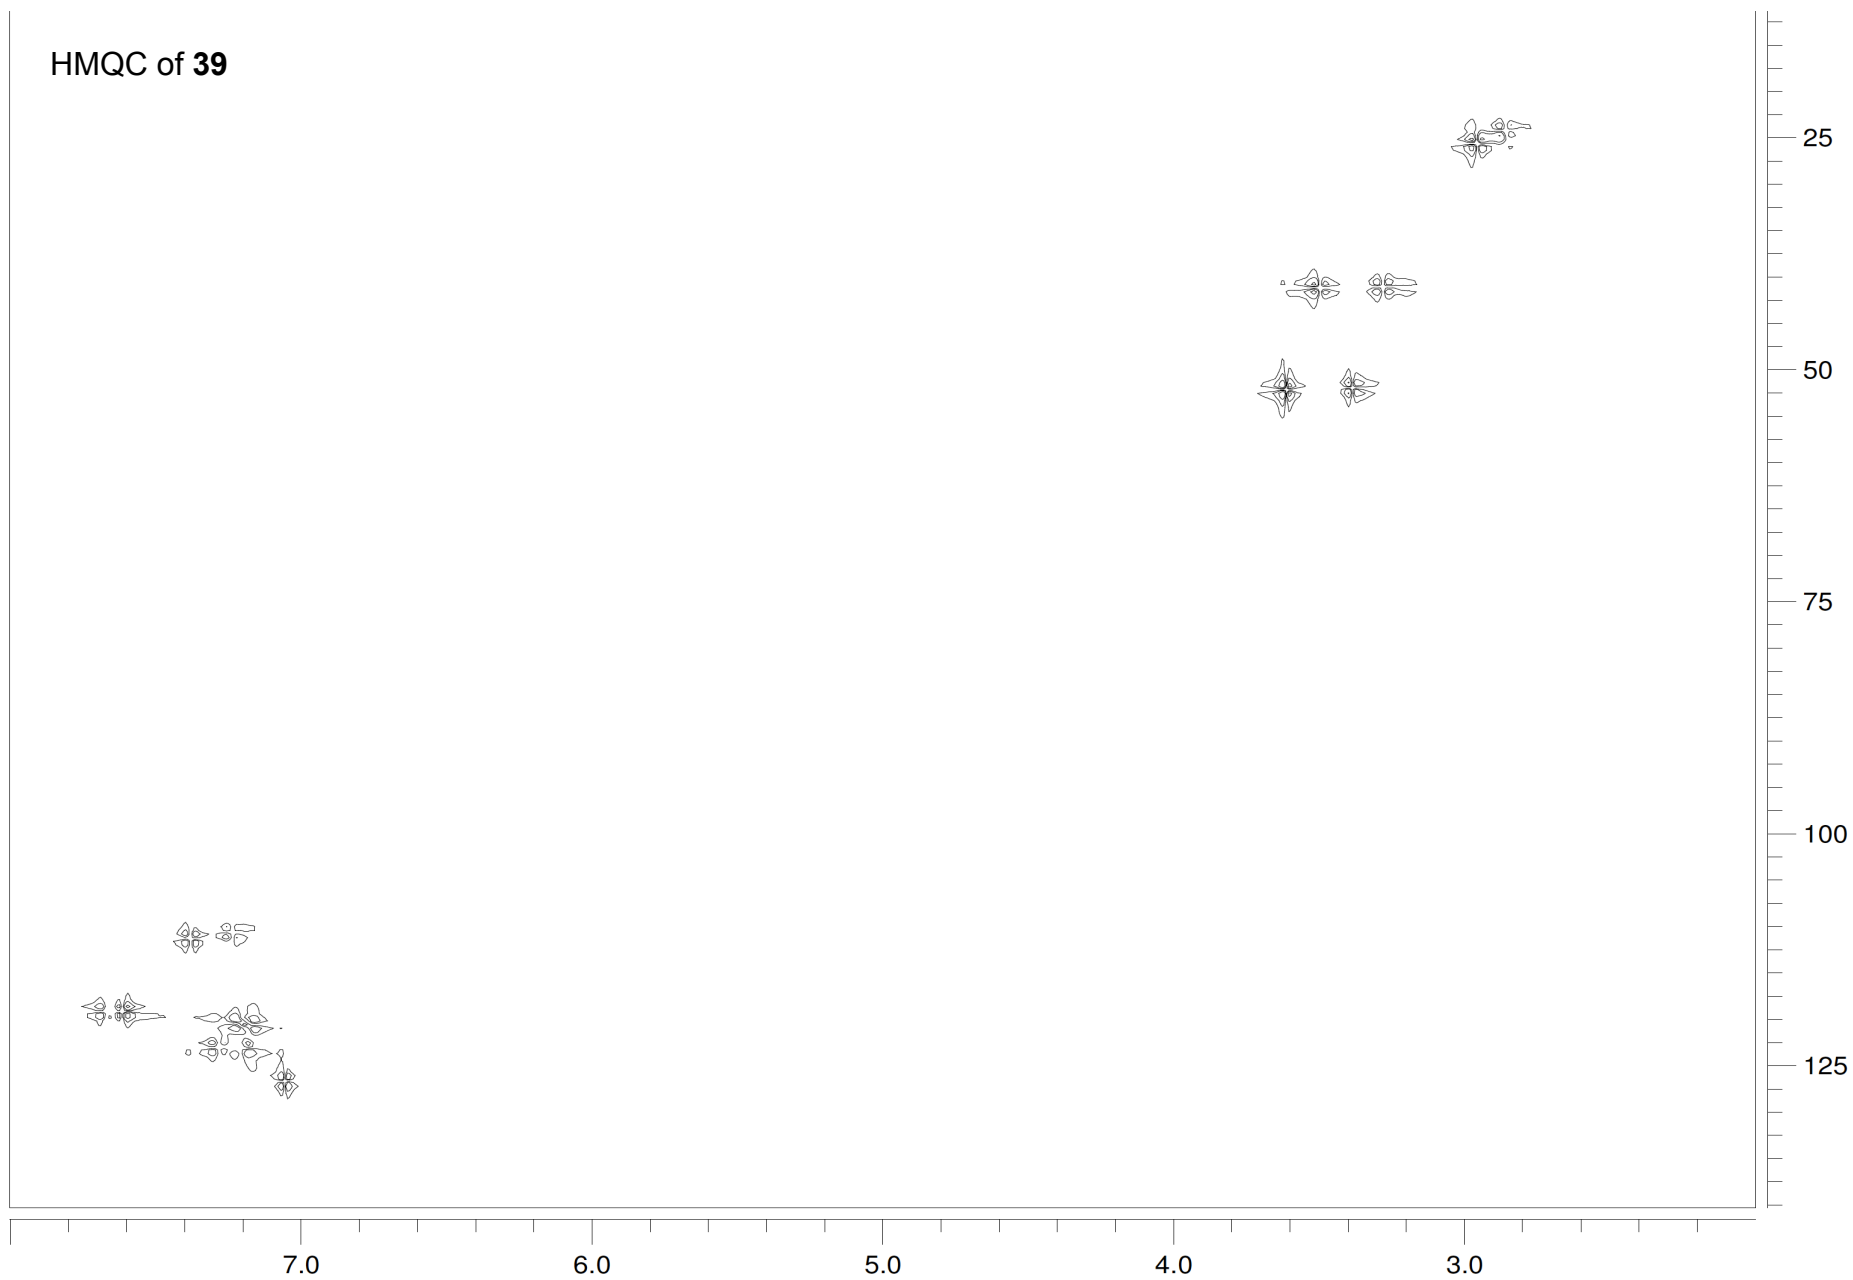

<sup>1</sup>H-NMR of **45**

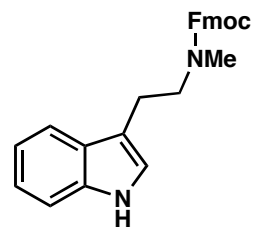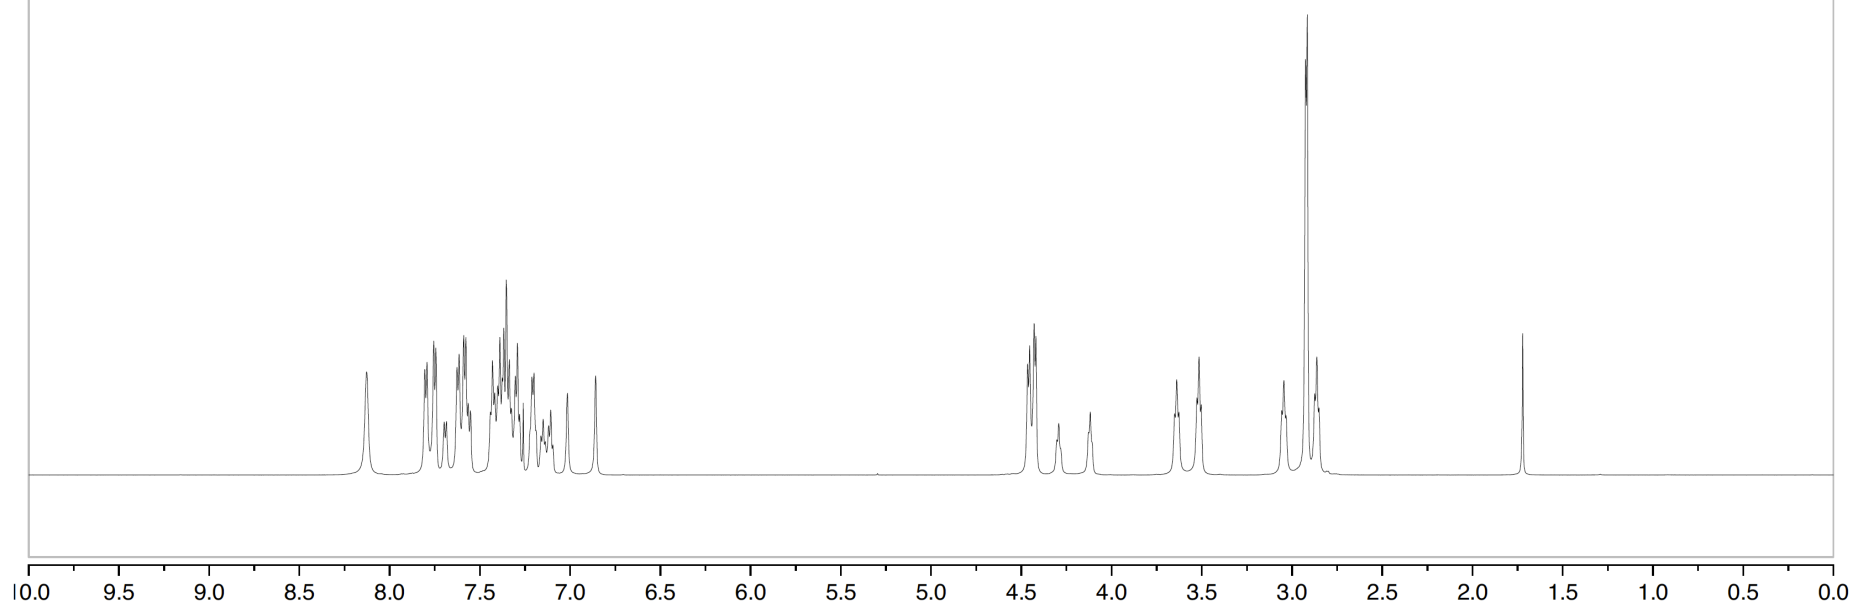

<sup>13</sup>C-NMR of **45**

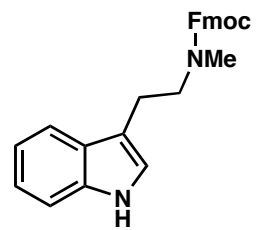

**45**

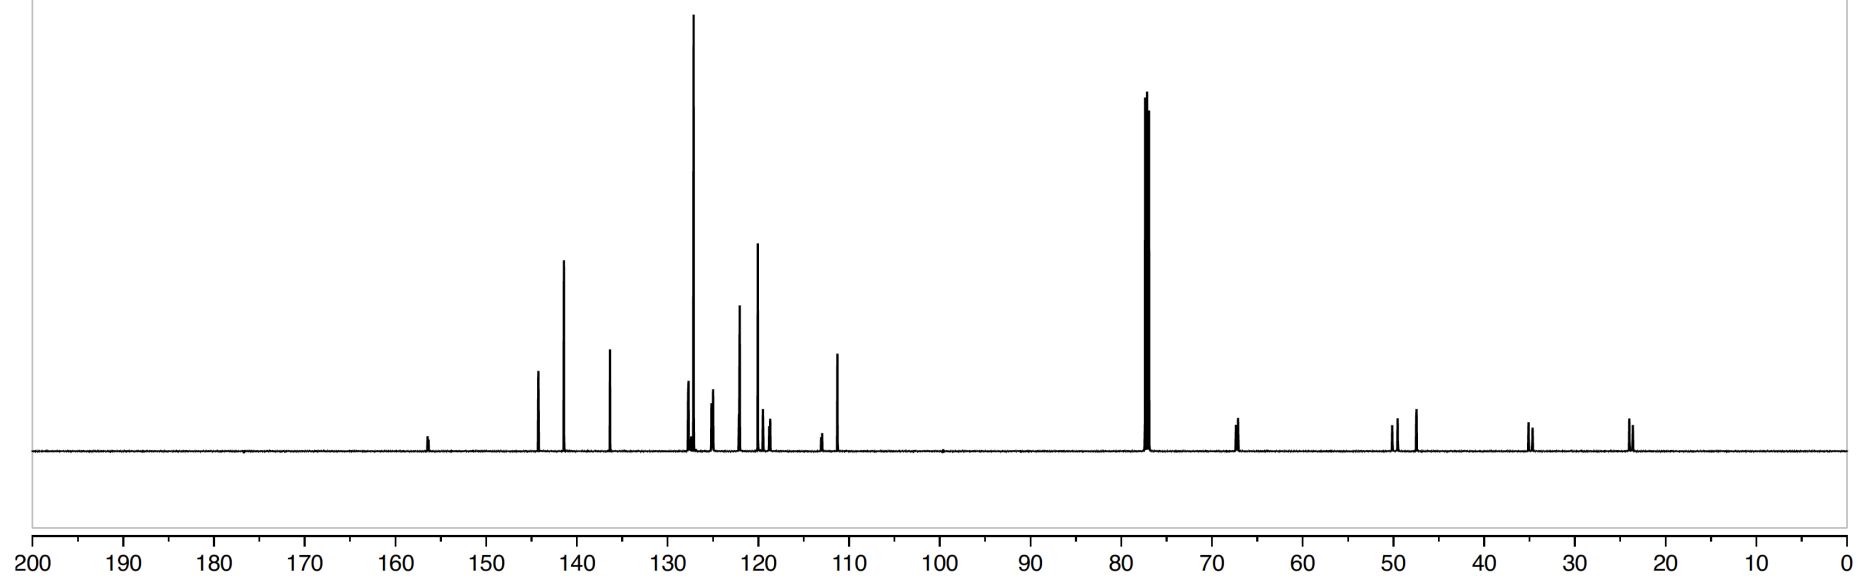

HMQC of 45

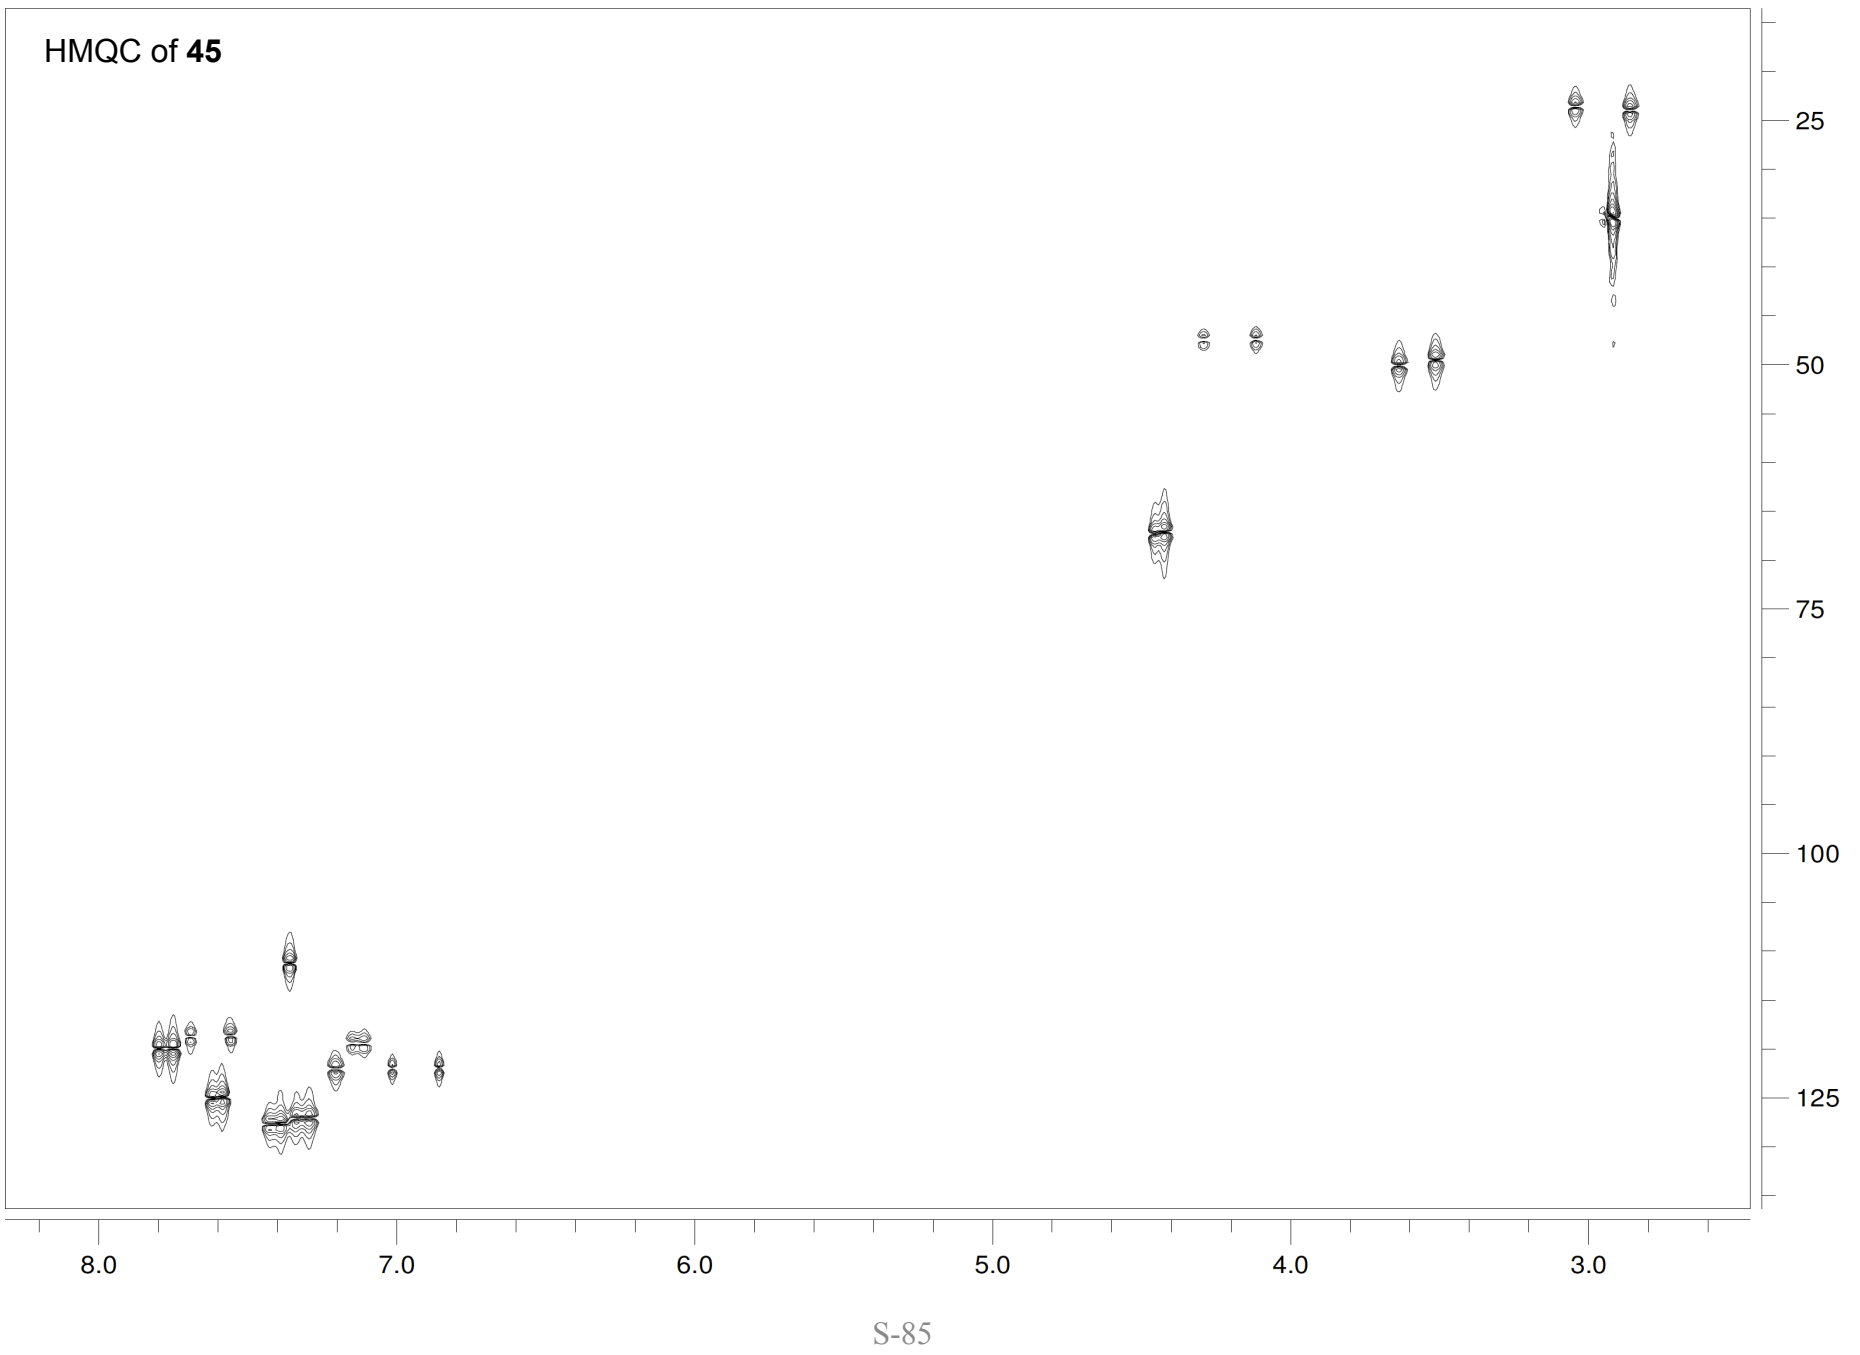

<sup>1</sup>H-NMR of **47**

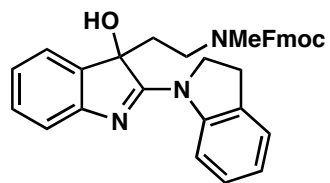

**47**

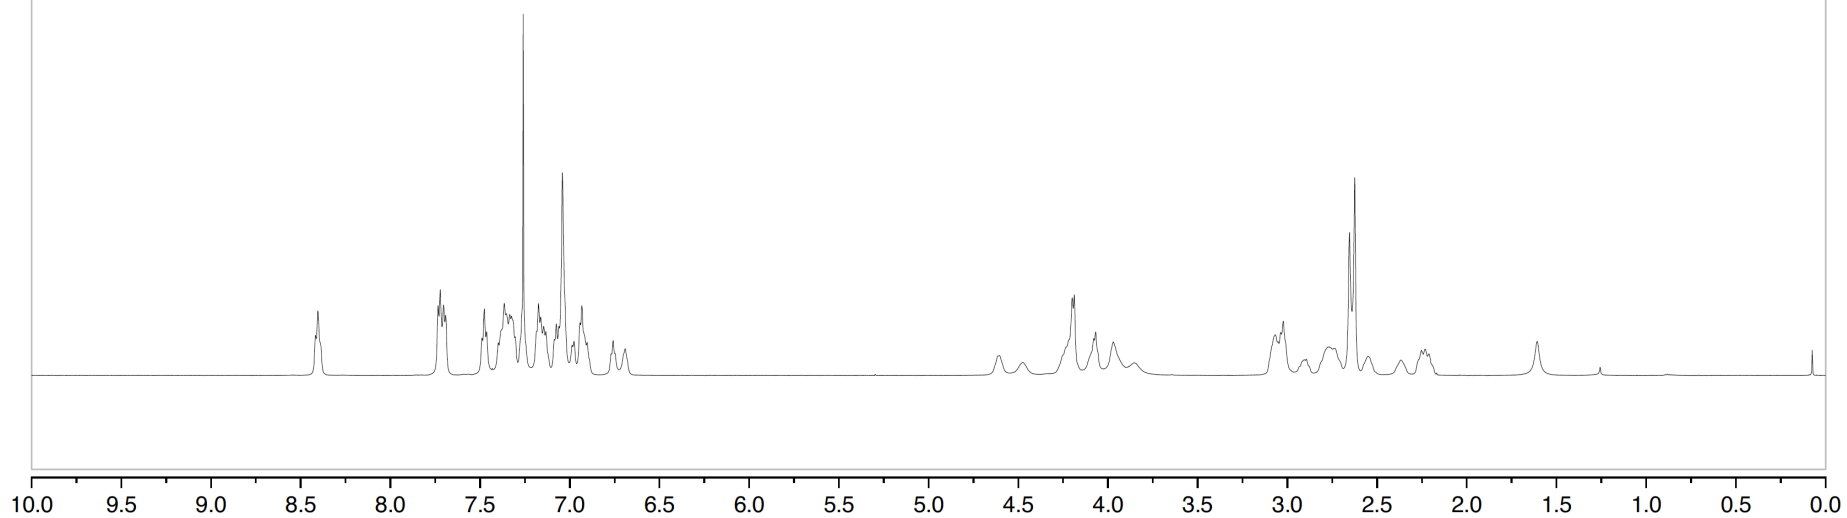



<sup>13</sup>C-NMR of **47**

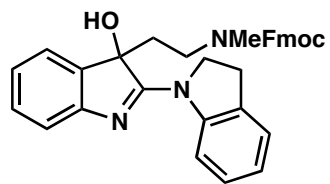

**47**

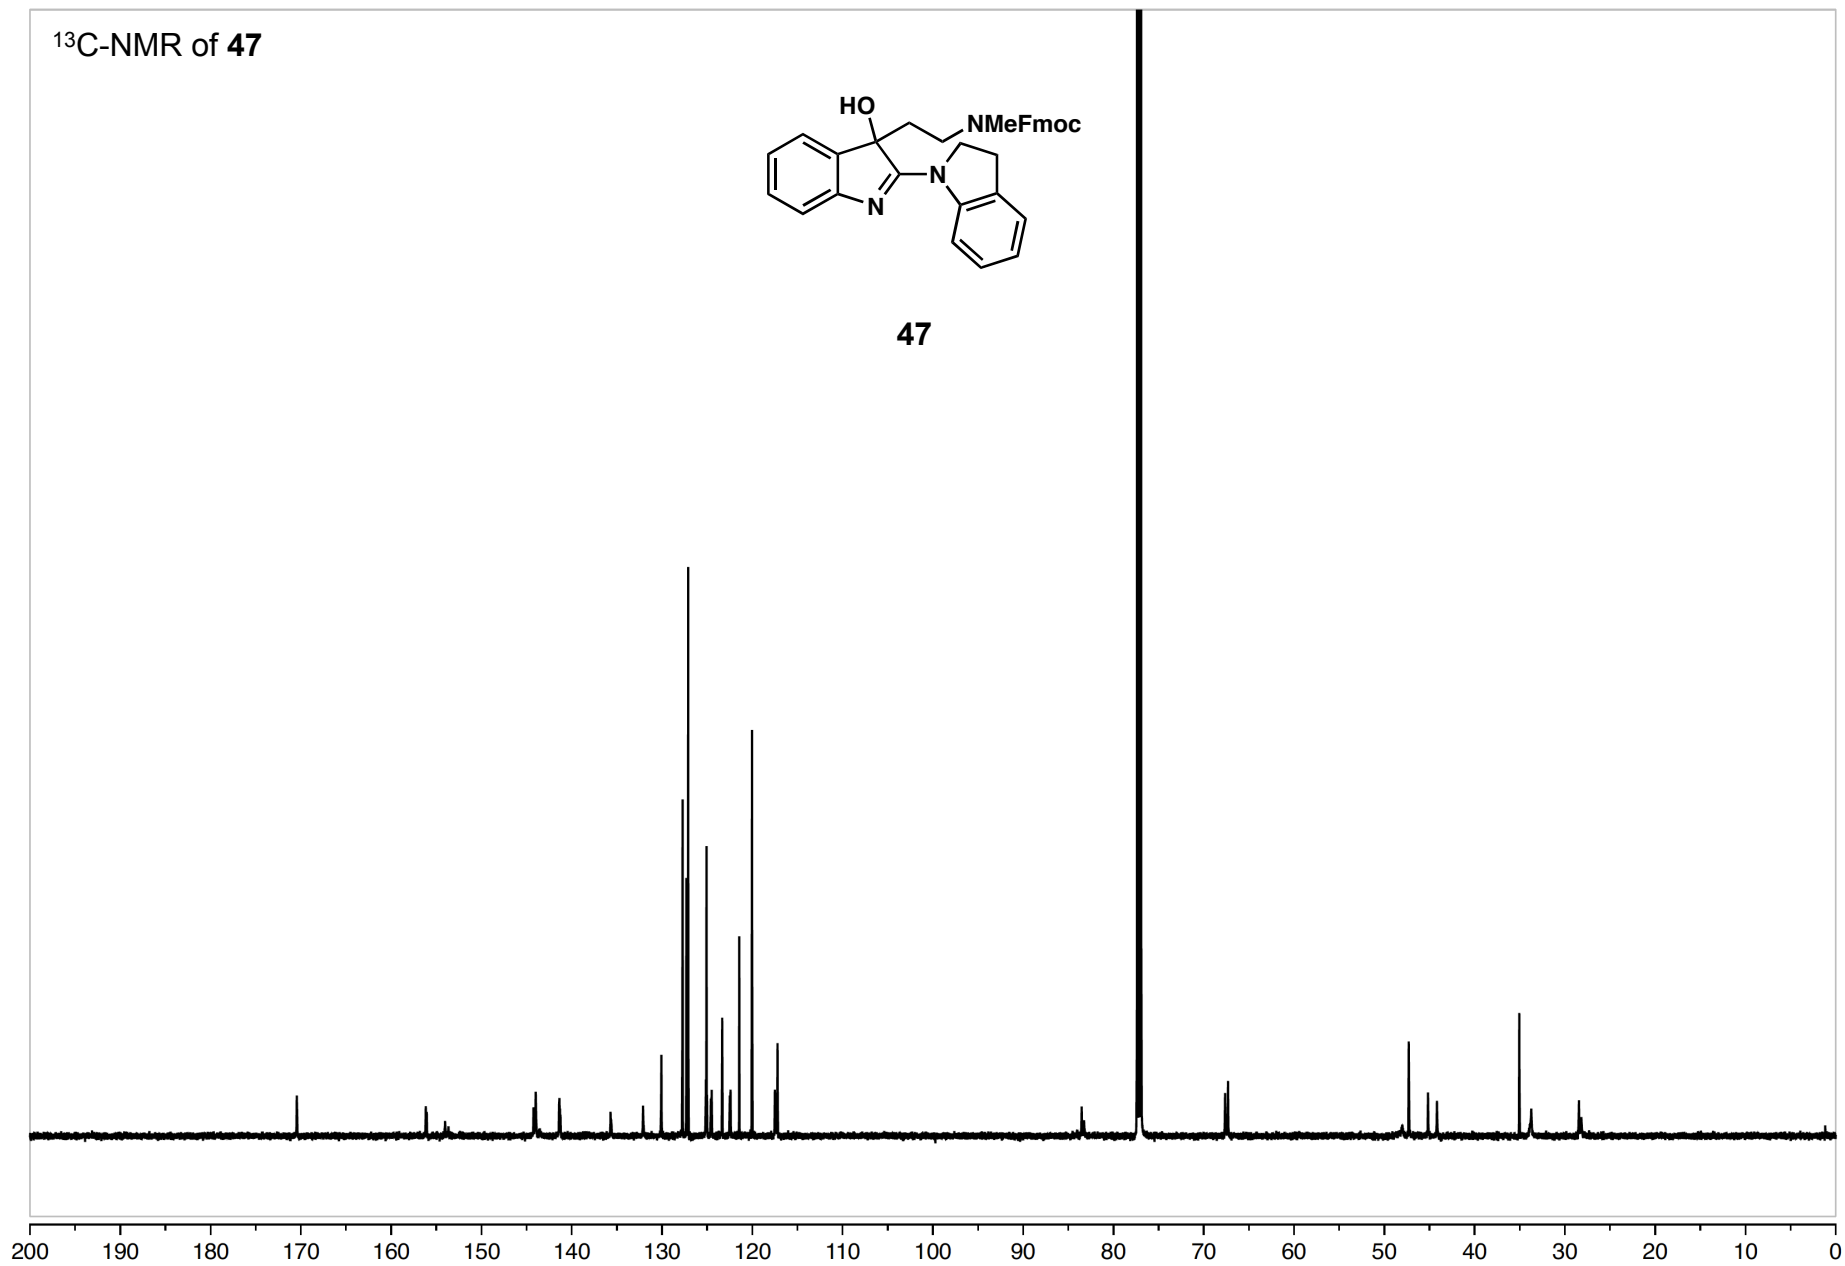

HMQC of 47

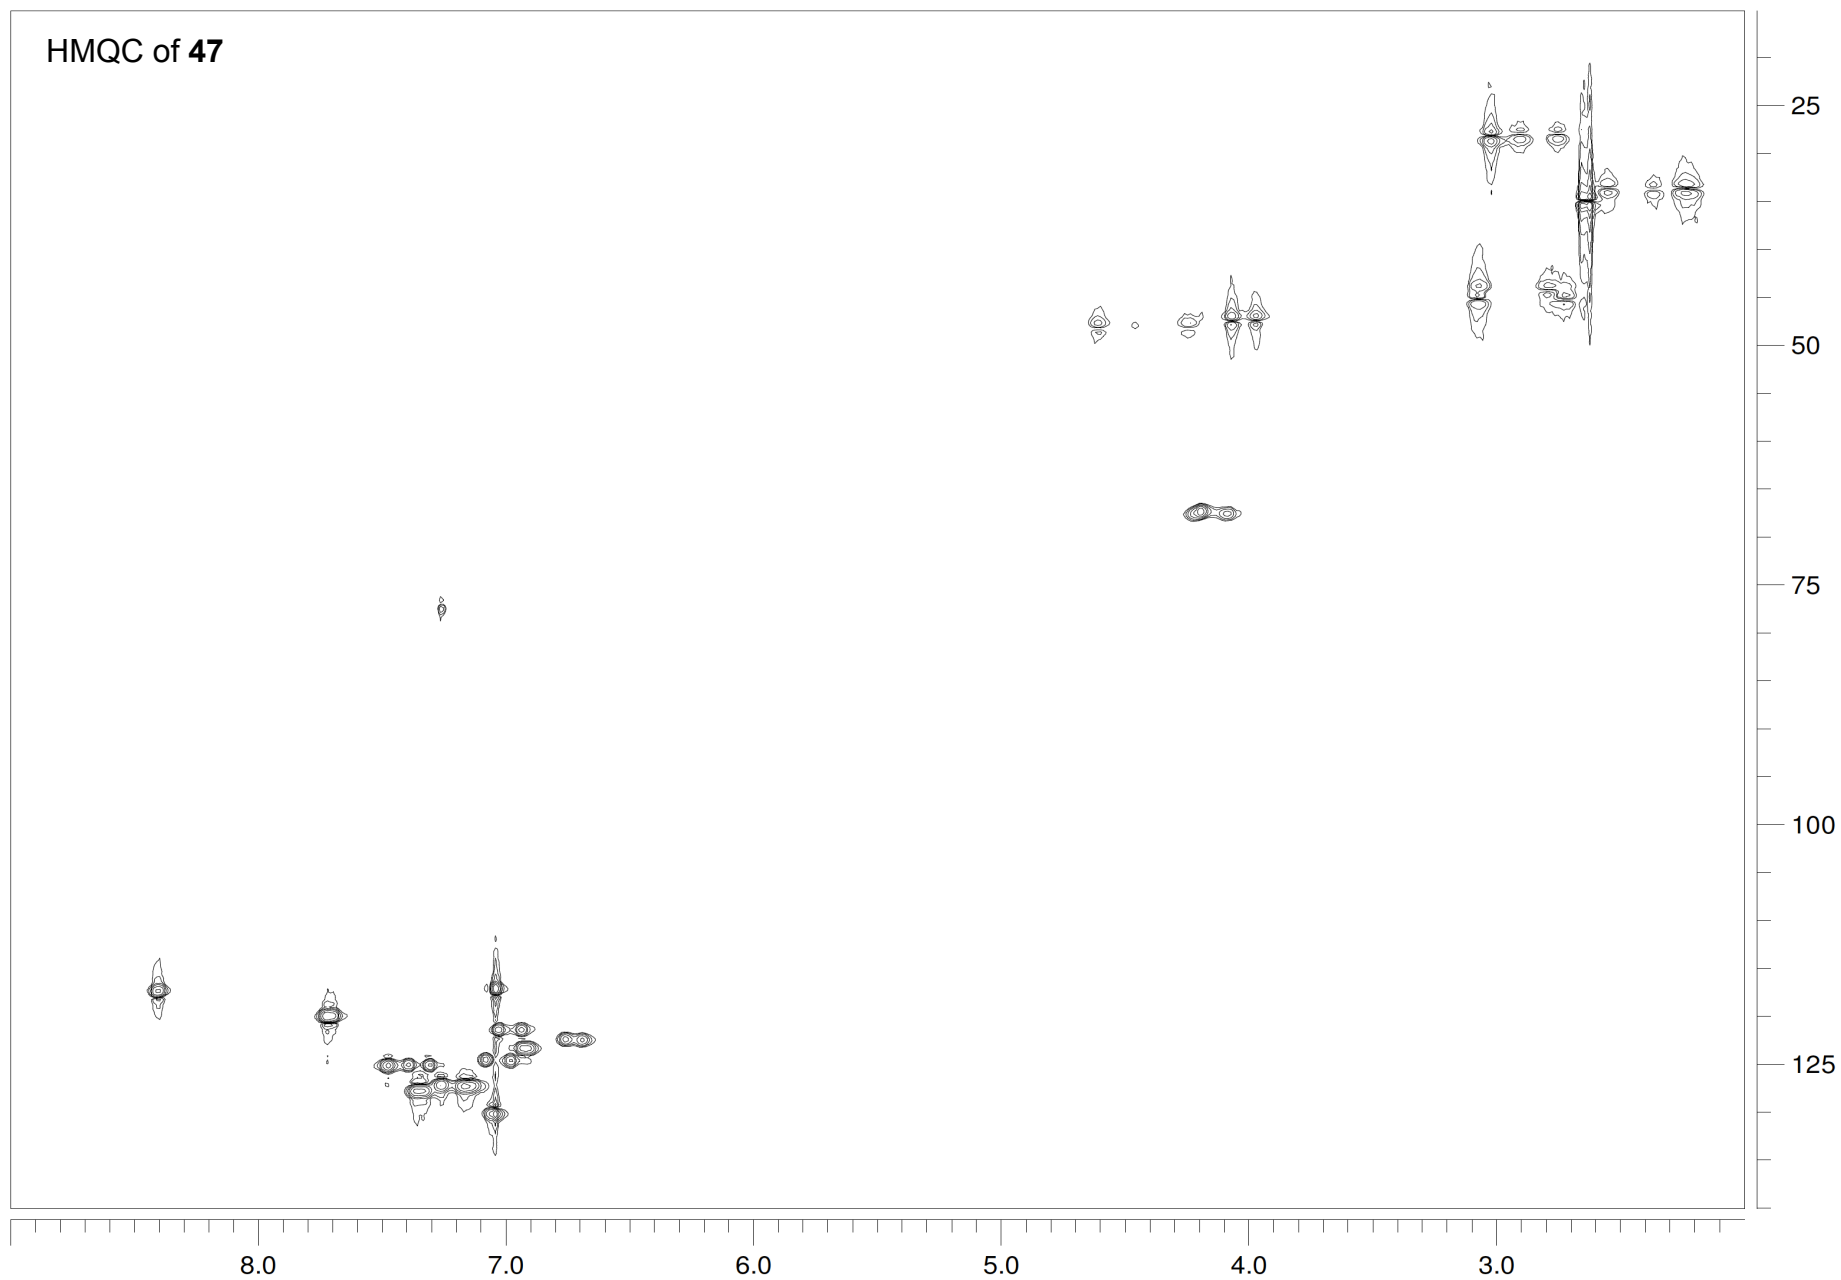

S-88

HMBC of 47

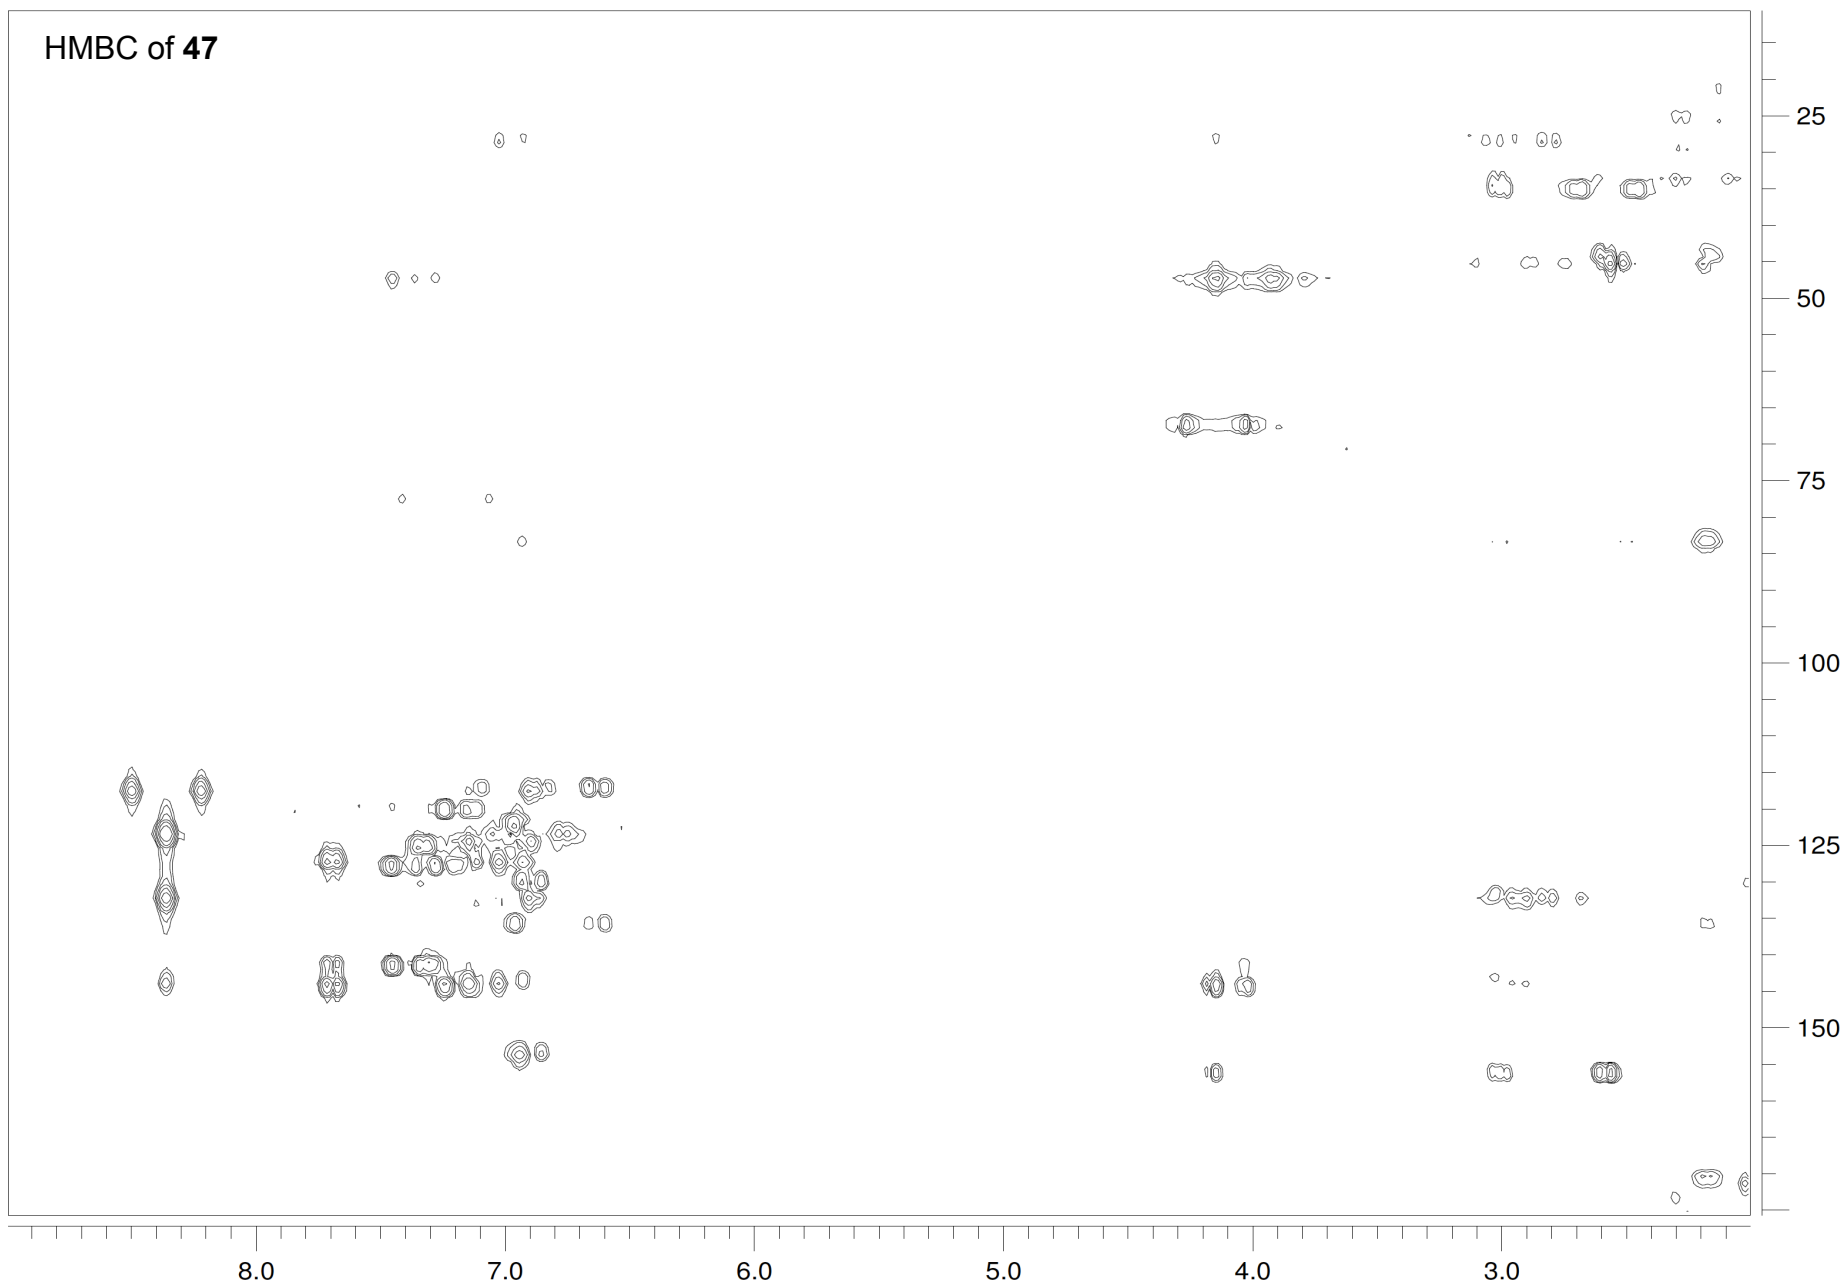

<sup>1</sup>H-NMR of **49**

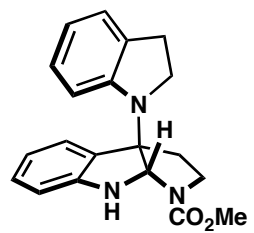

**49**

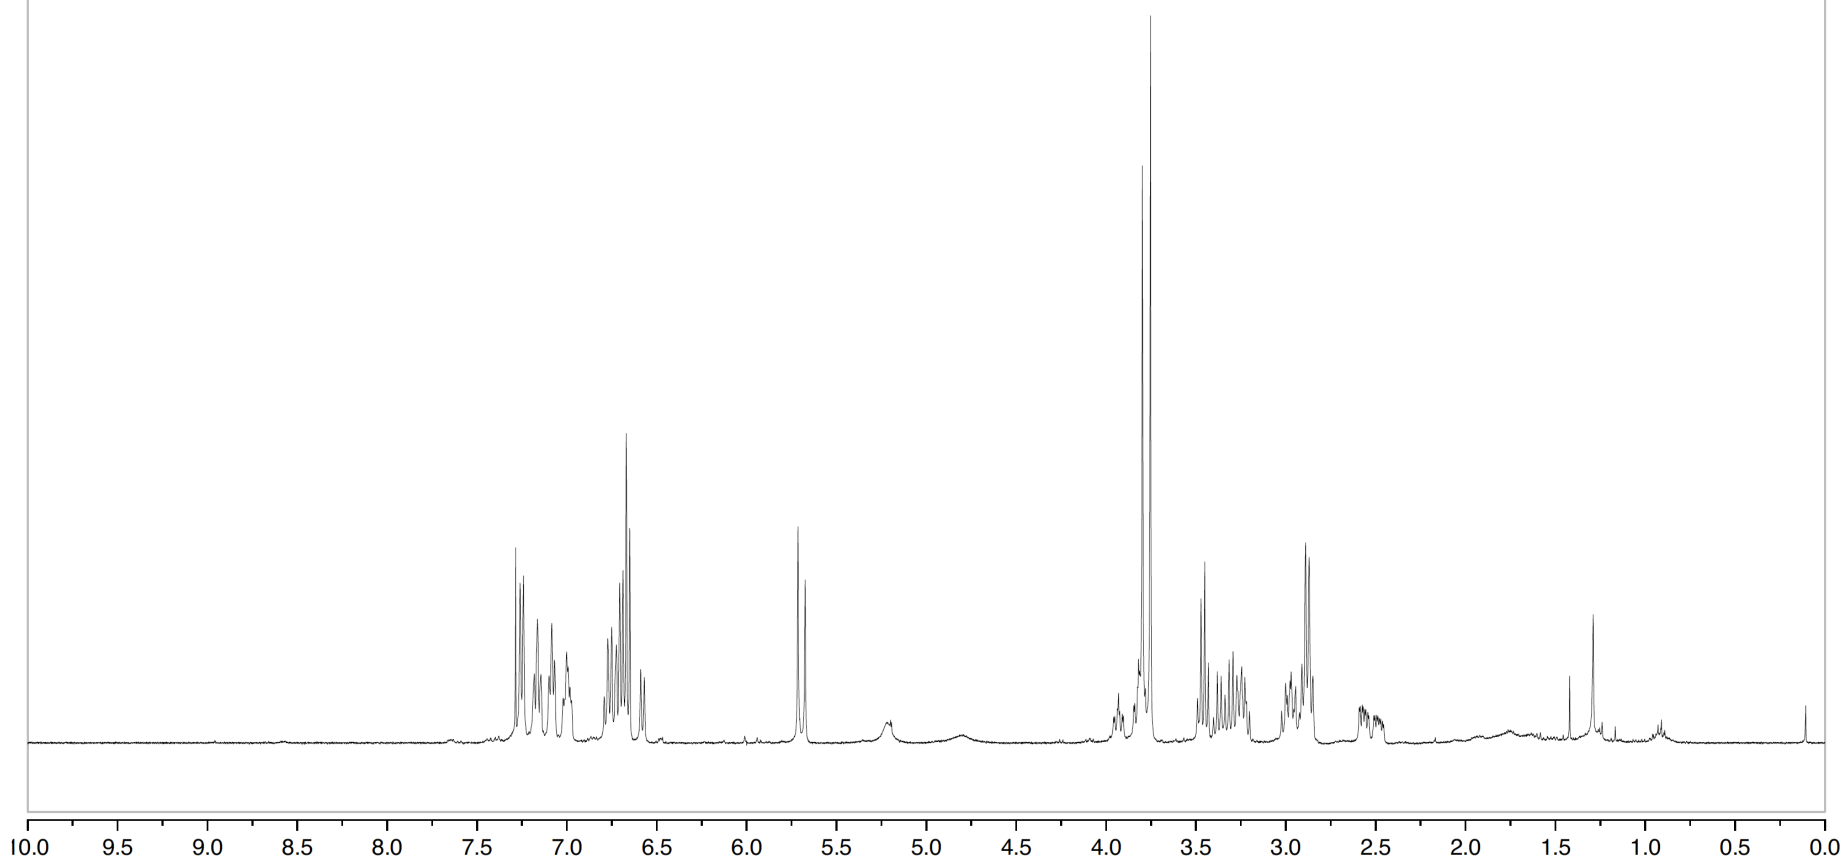

<sup>13</sup>C-NMR of **49**



**49**

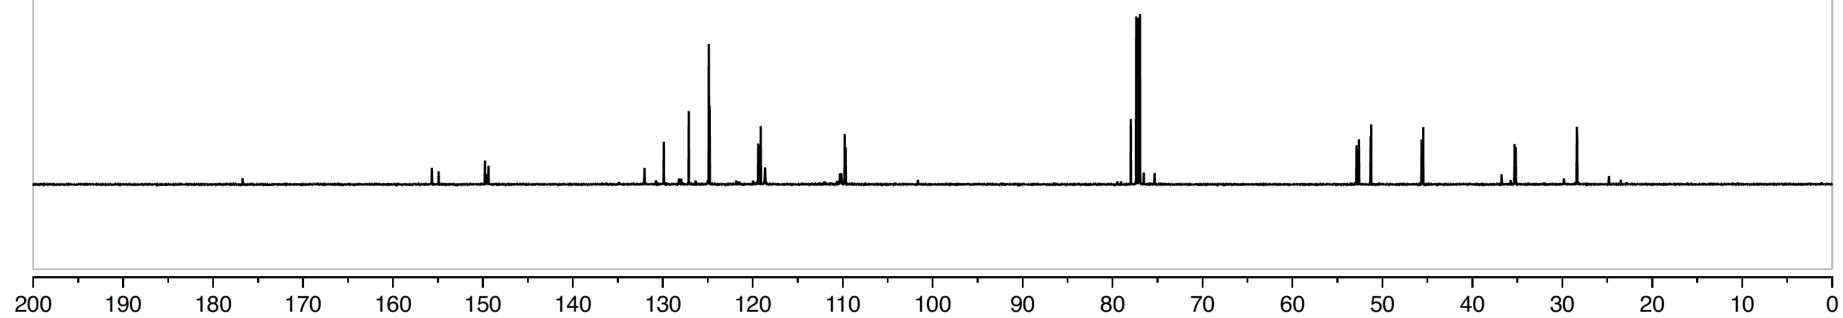

HMQC of 49

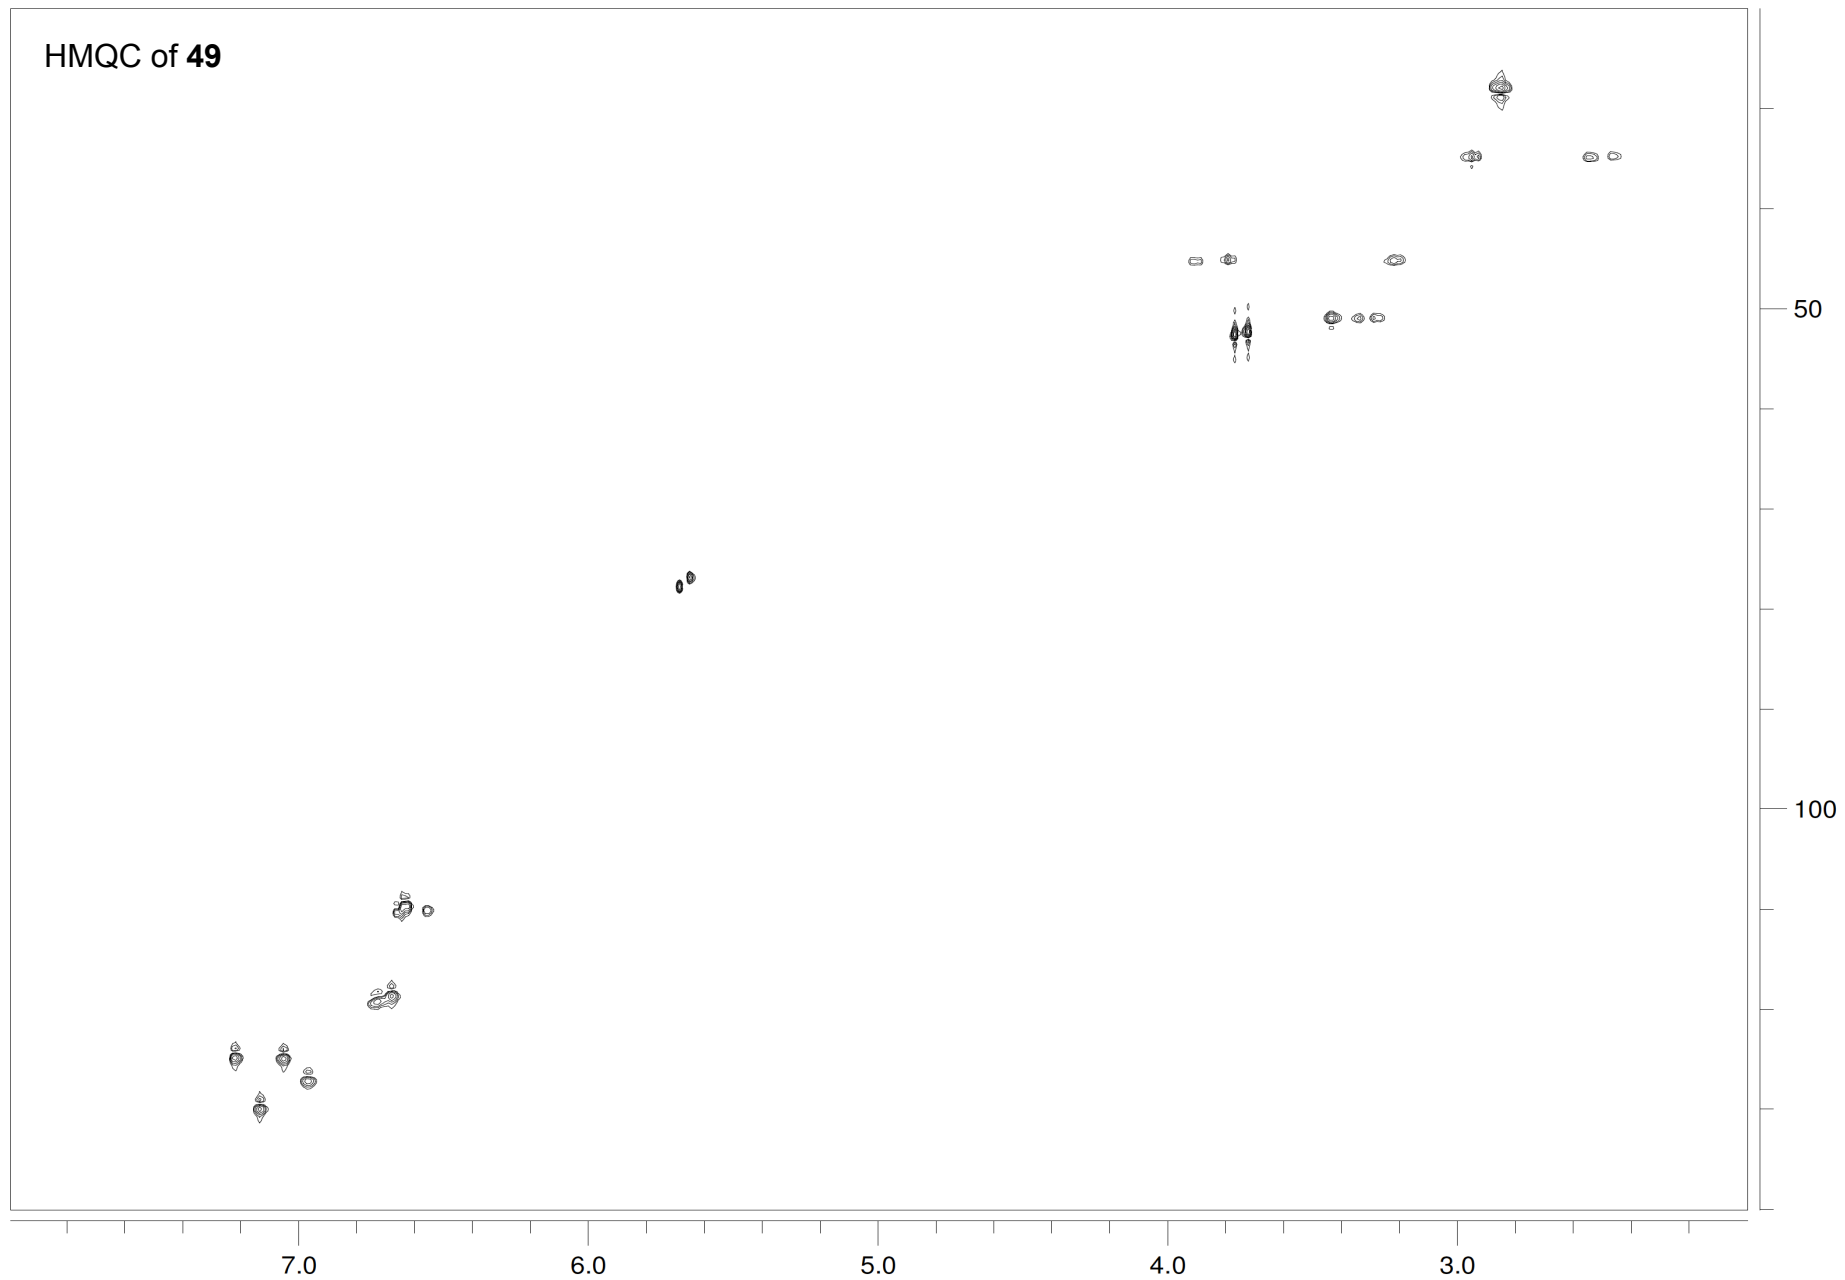

S-92

<sup>1</sup>H-NMR of **50**

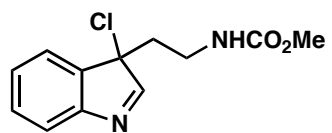

**50**

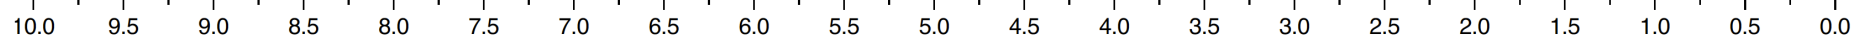

<sup>13</sup>C-NMR of **50**



**50**

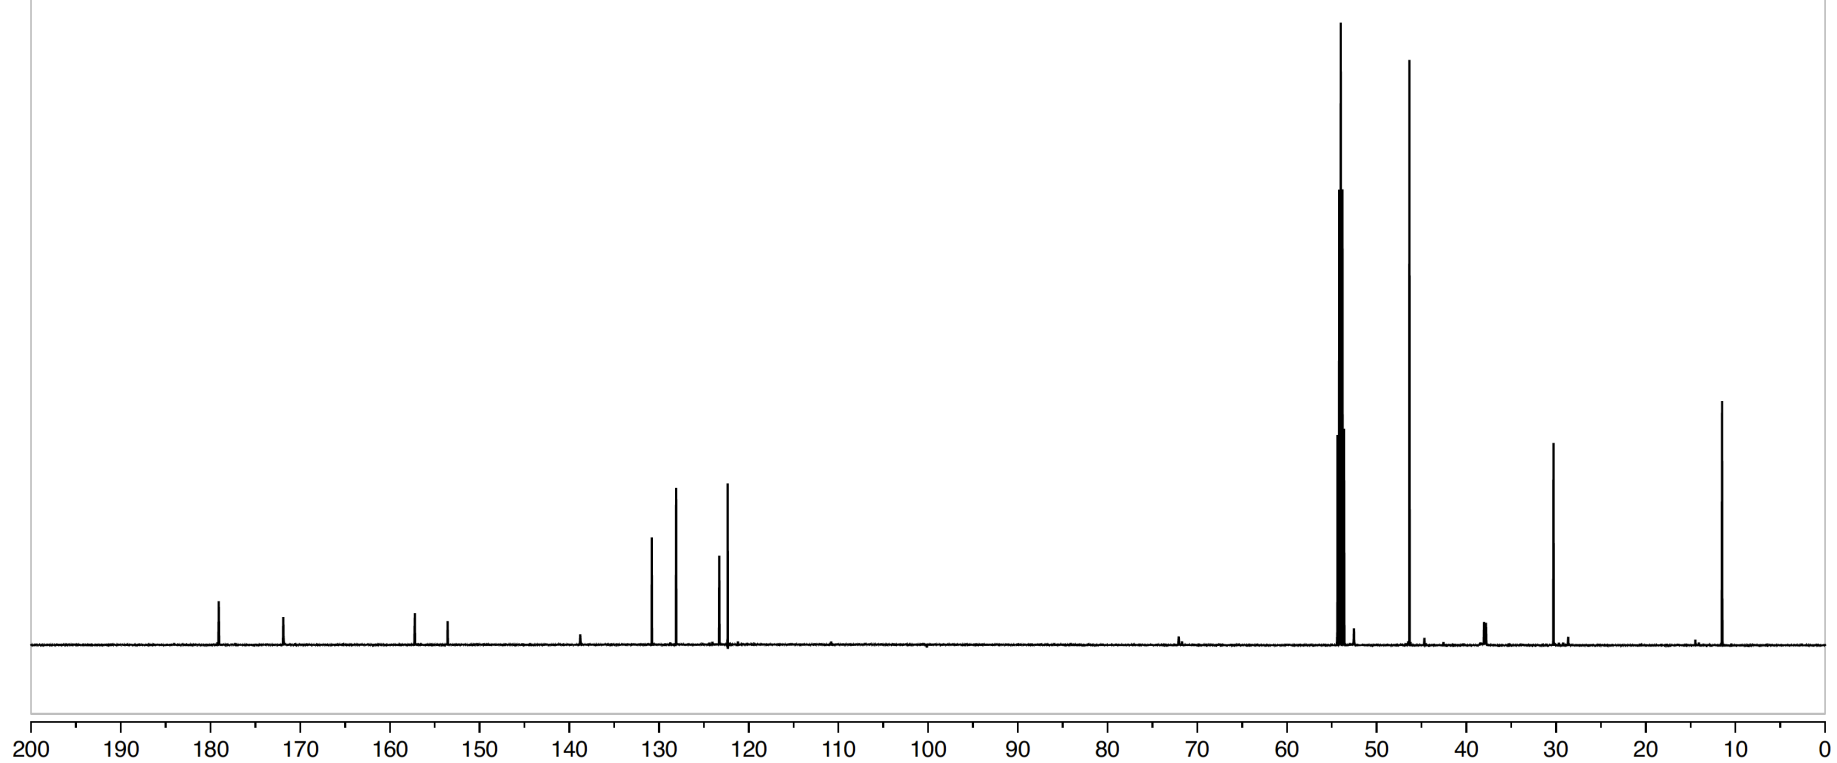



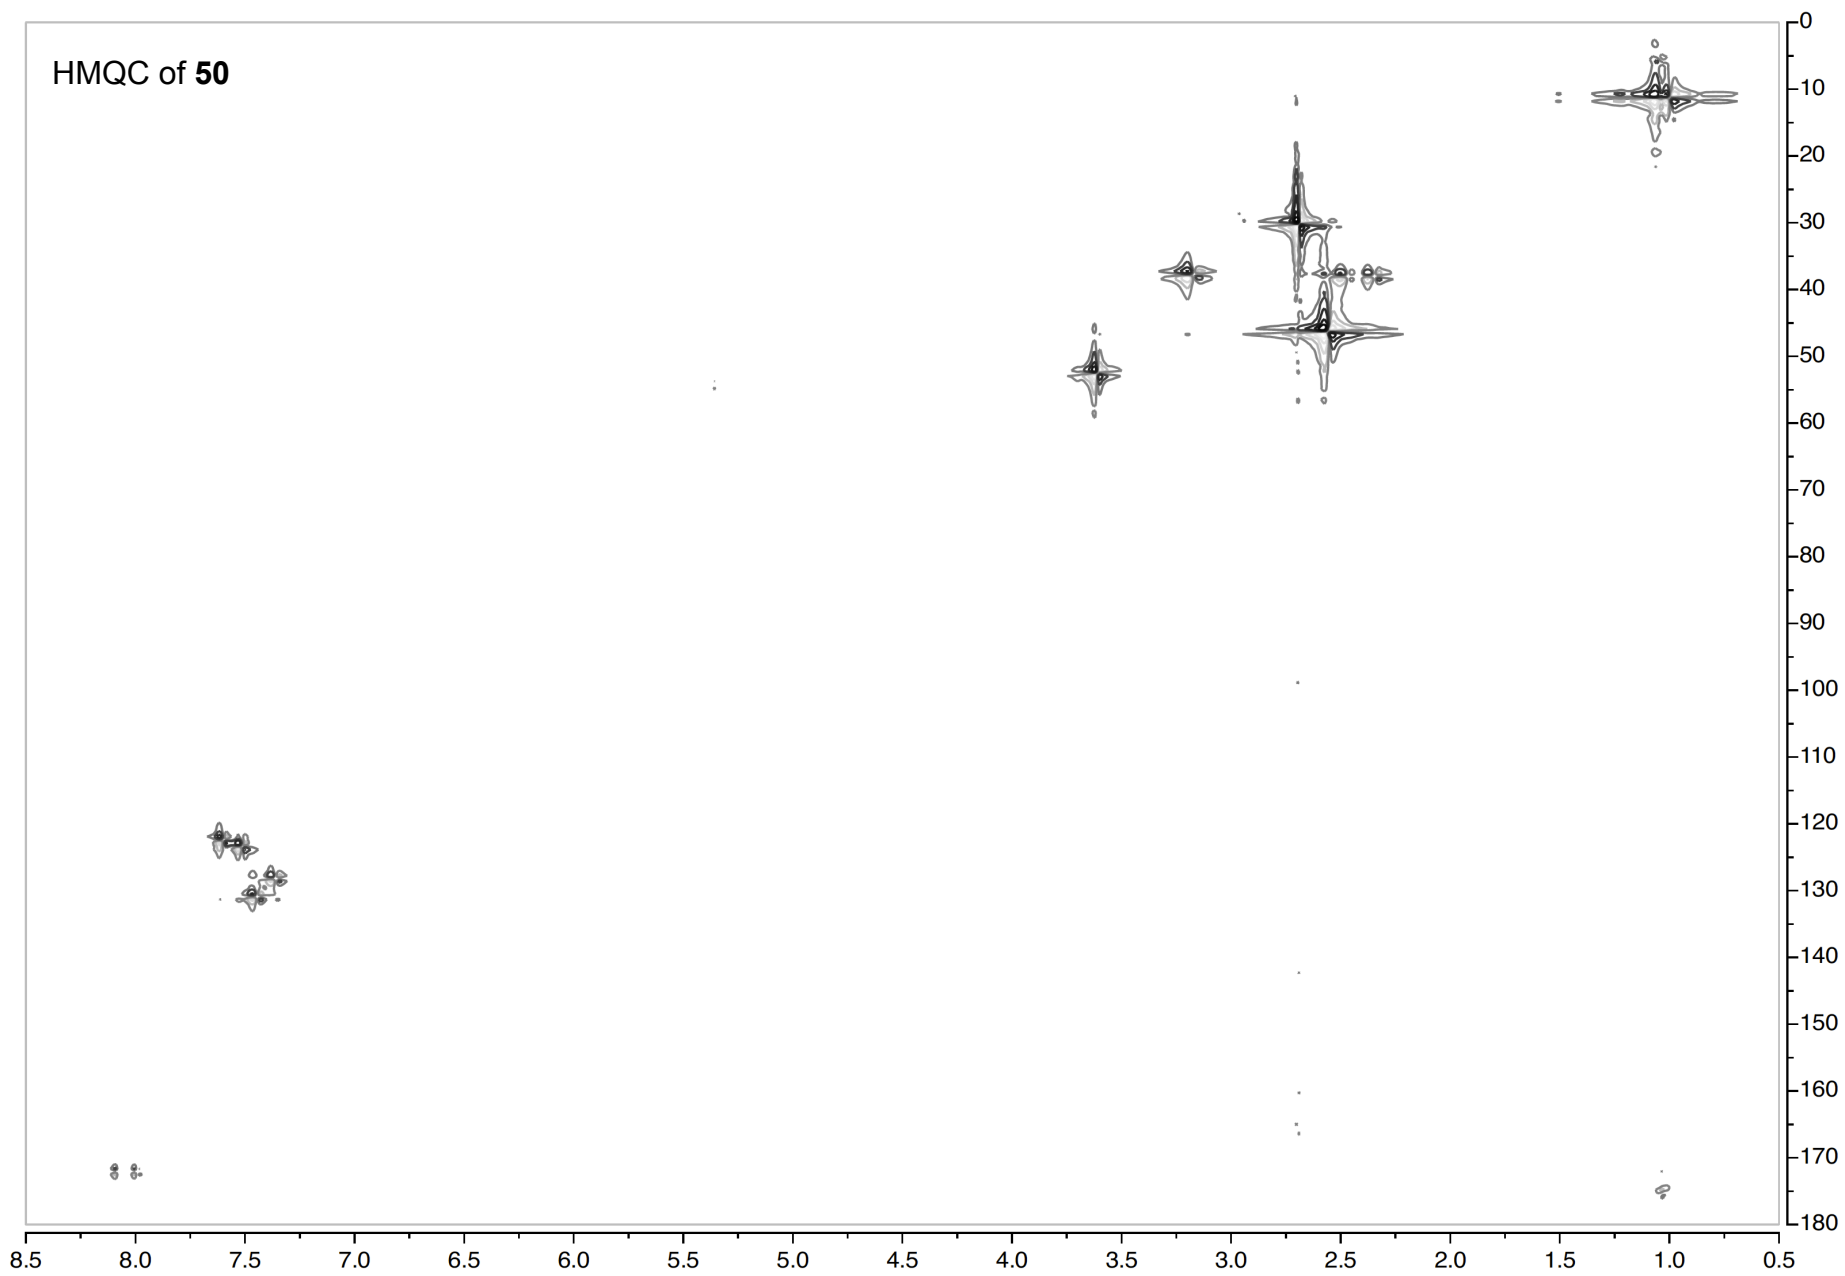

S-95

<sup>1</sup>H-NMR of **51**

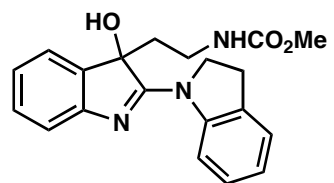

**51**

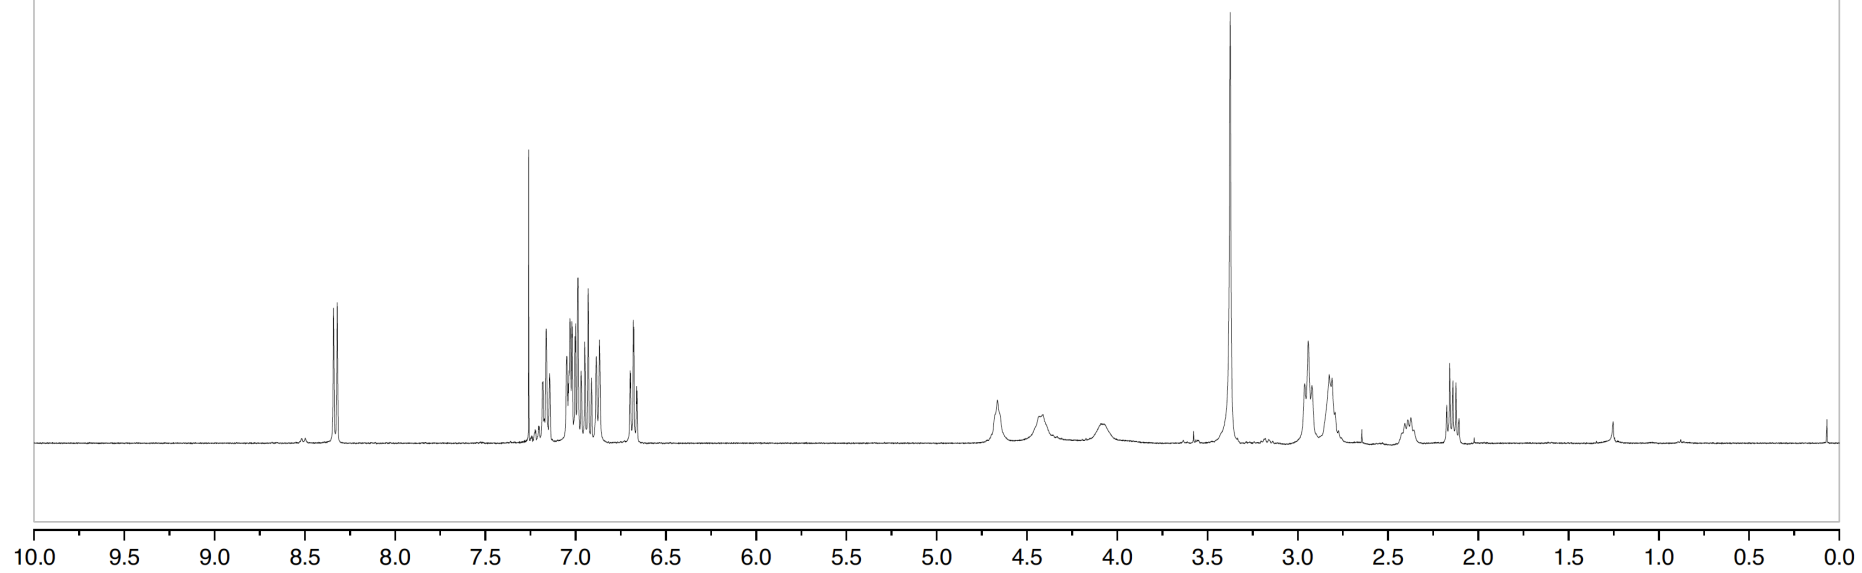

<sup>13</sup>C-NMR of **51**

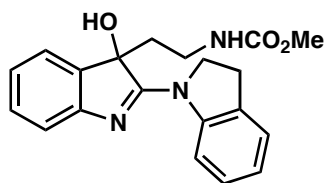

**51**

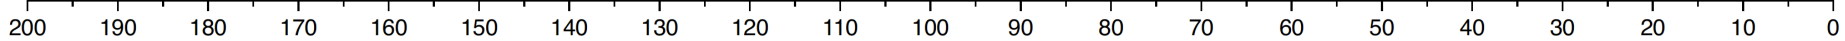

HMQC of 51

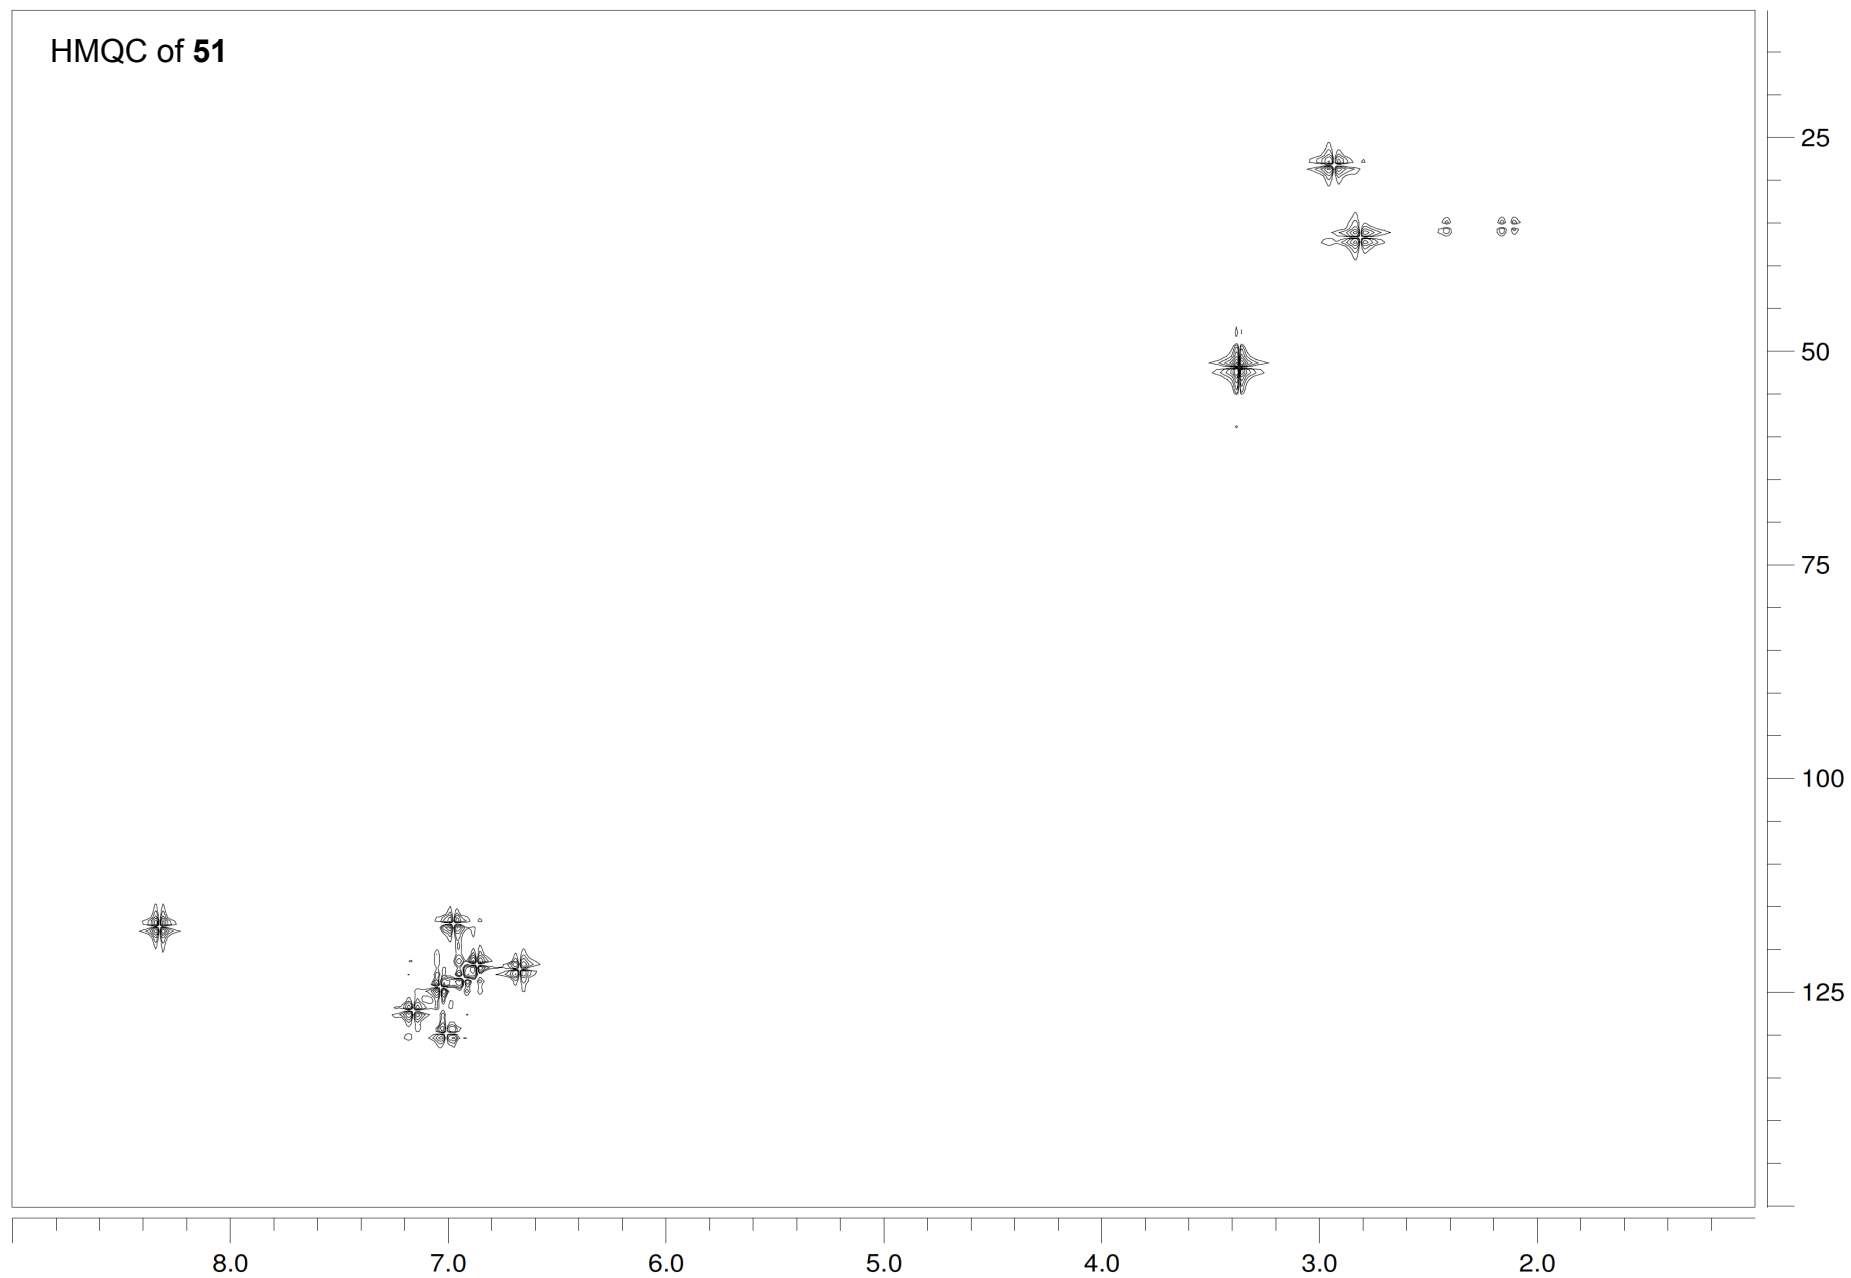

S-98

<sup>1</sup>H-NMR of **62**

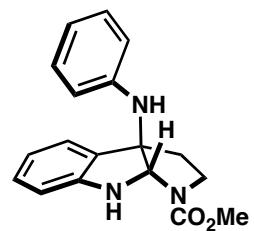

**62**

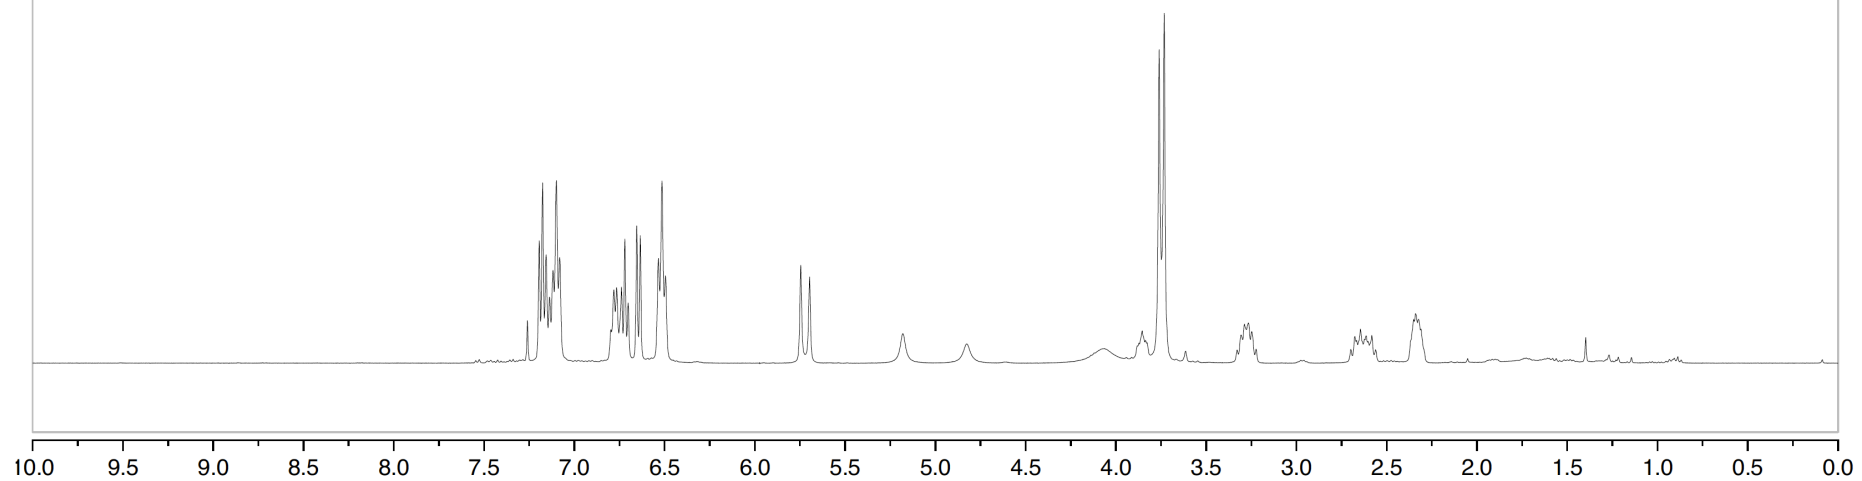

<sup>13</sup>C-NMR of **62**

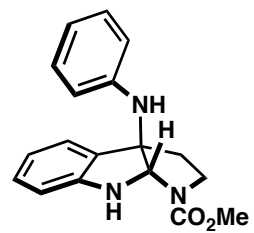

**62**

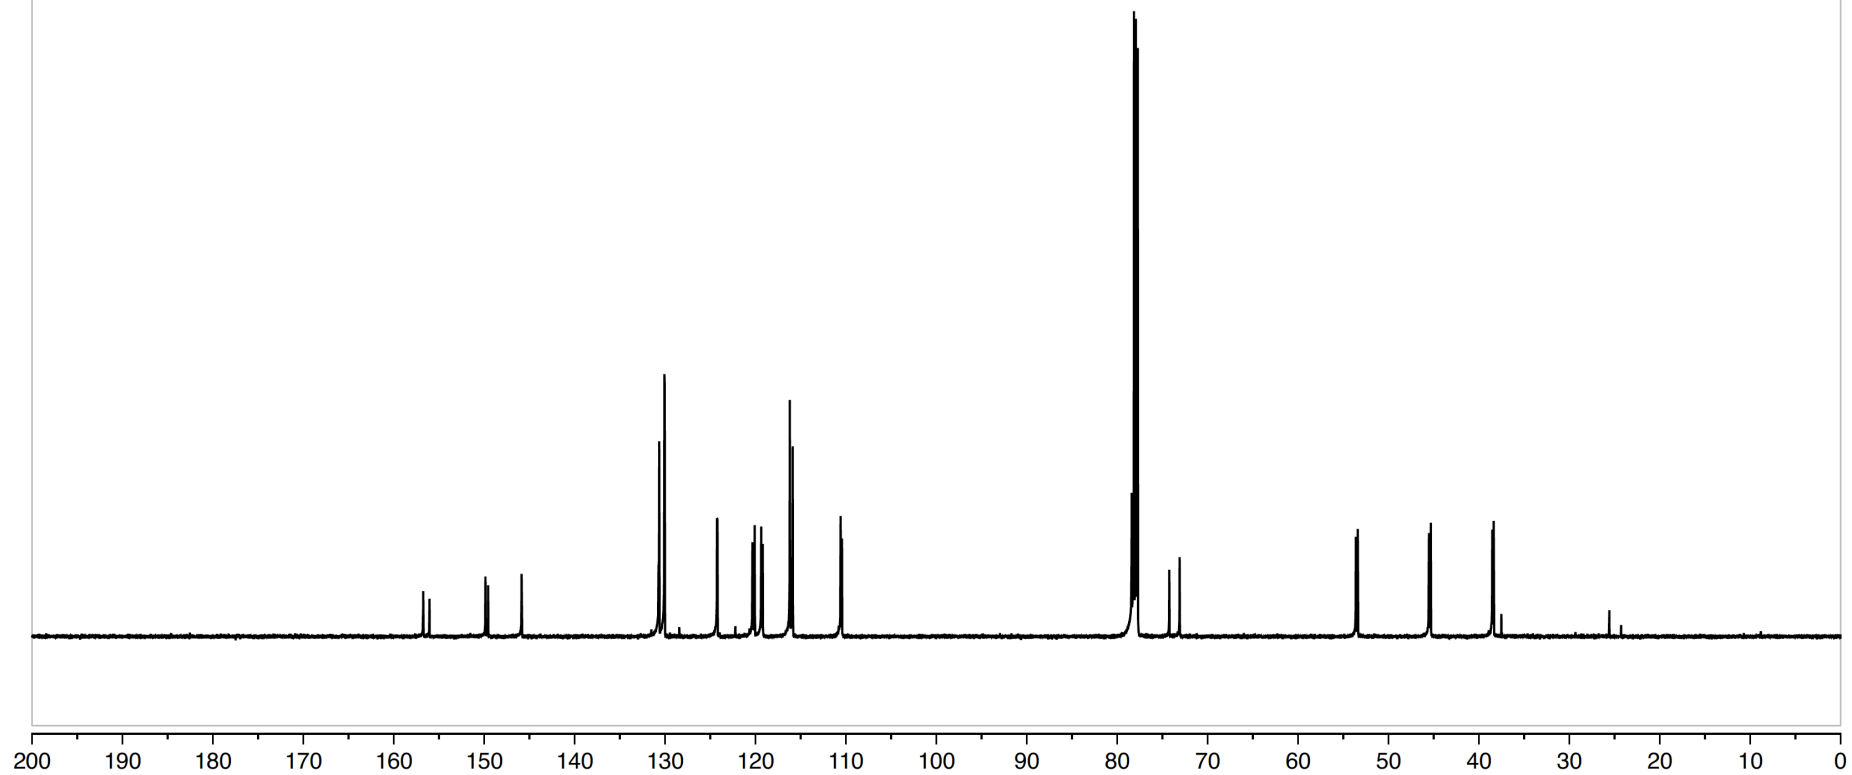

S-100

HMQC of 62

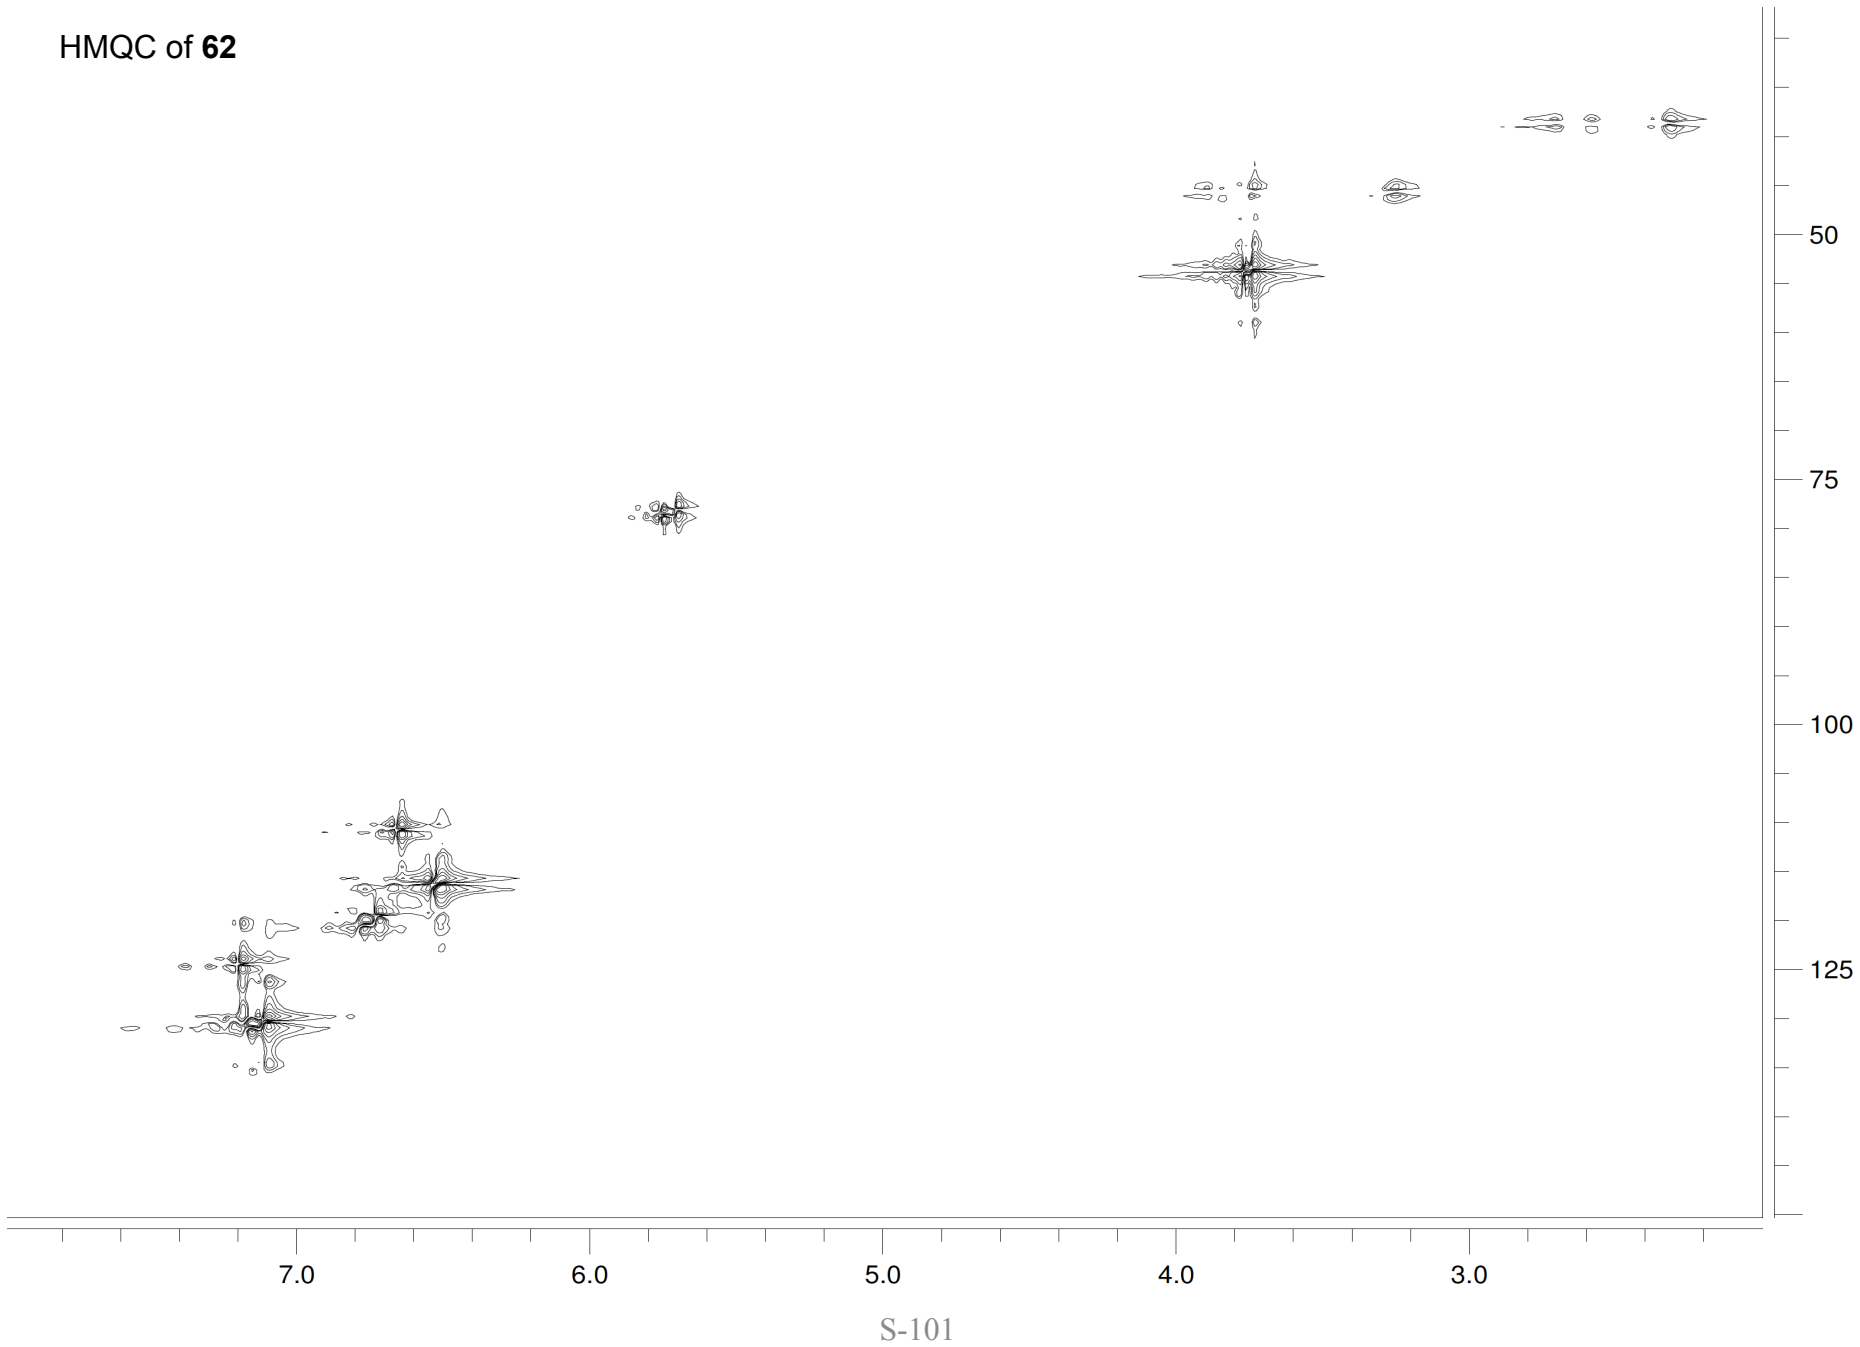

<sup>1</sup>H-NMR of **63**

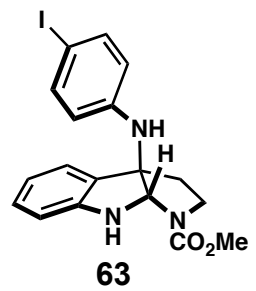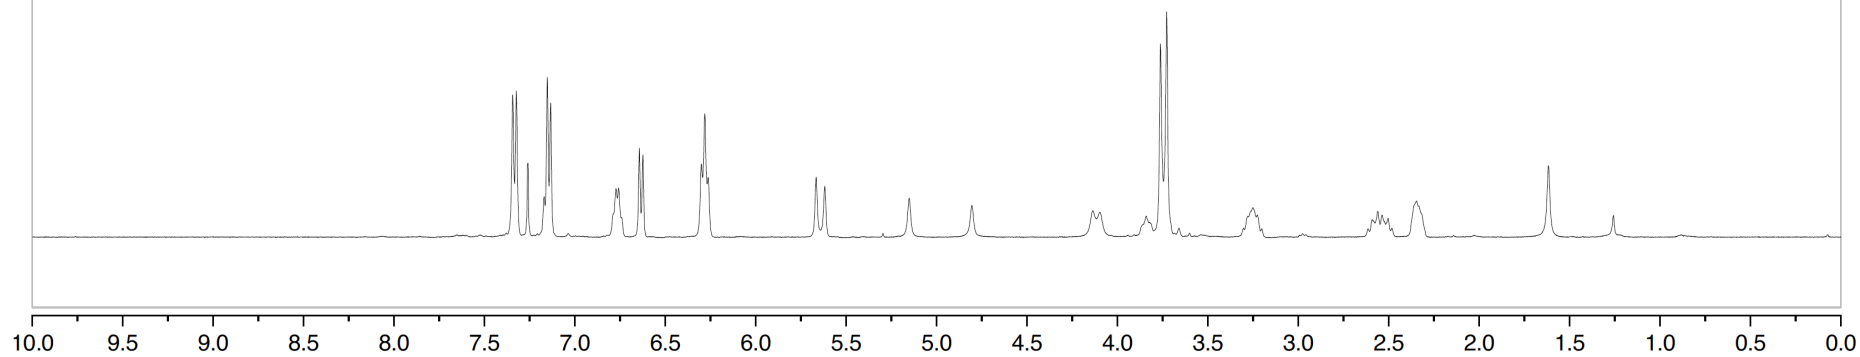



<sup>13</sup>C-NMR of **63**

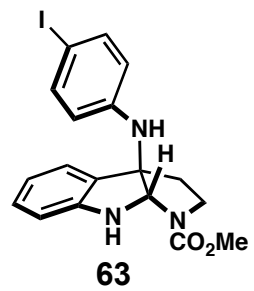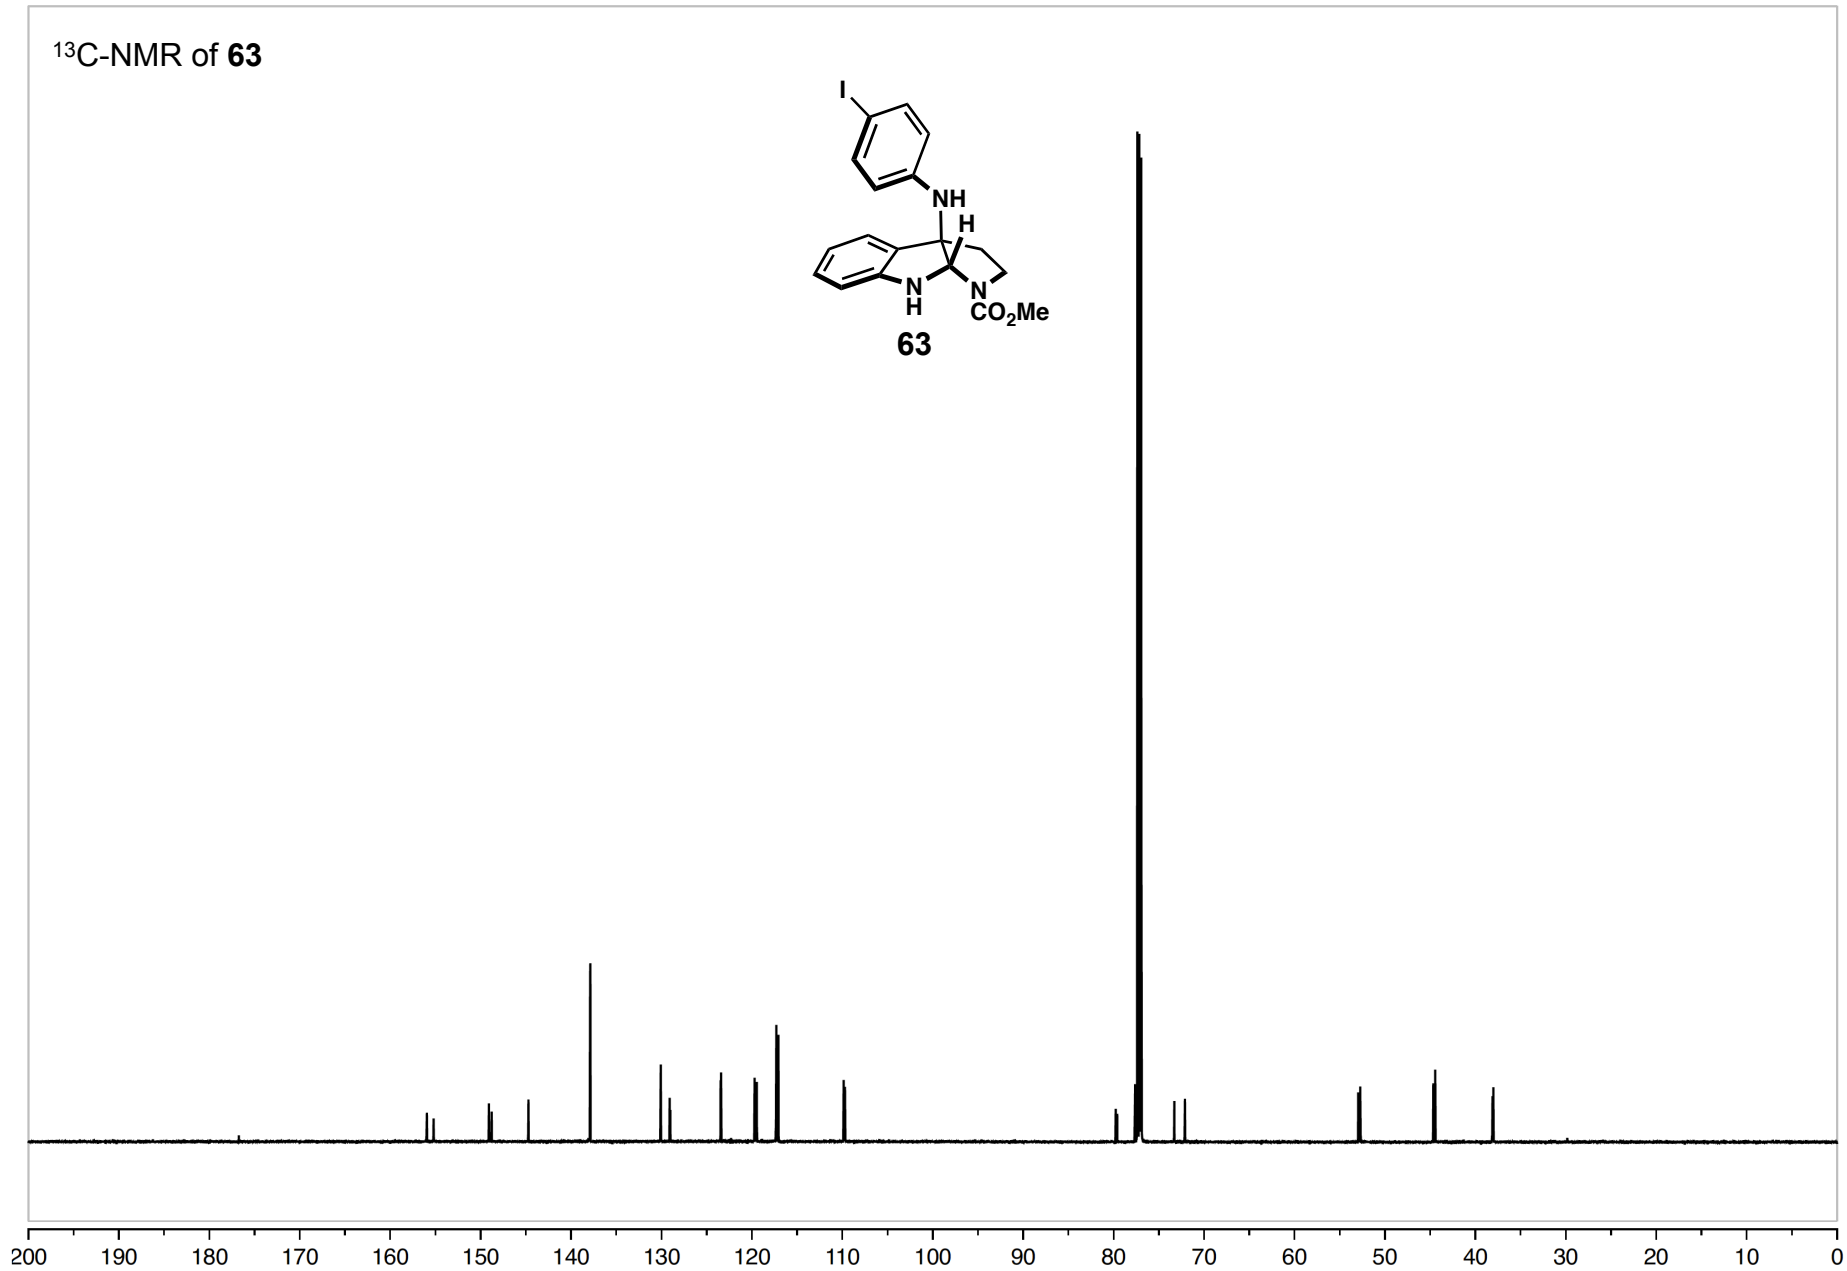

<sup>1</sup>H-NMR of **64**

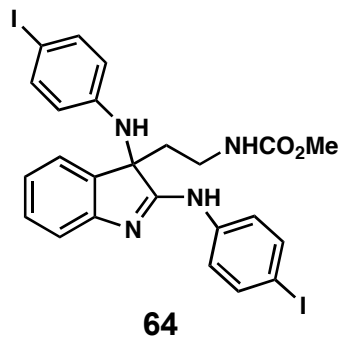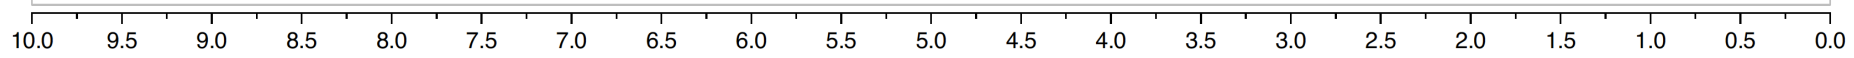

S-104

<sup>13</sup>C-NMR of **64**

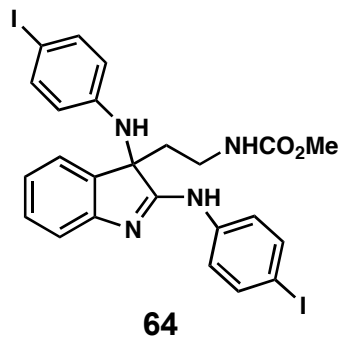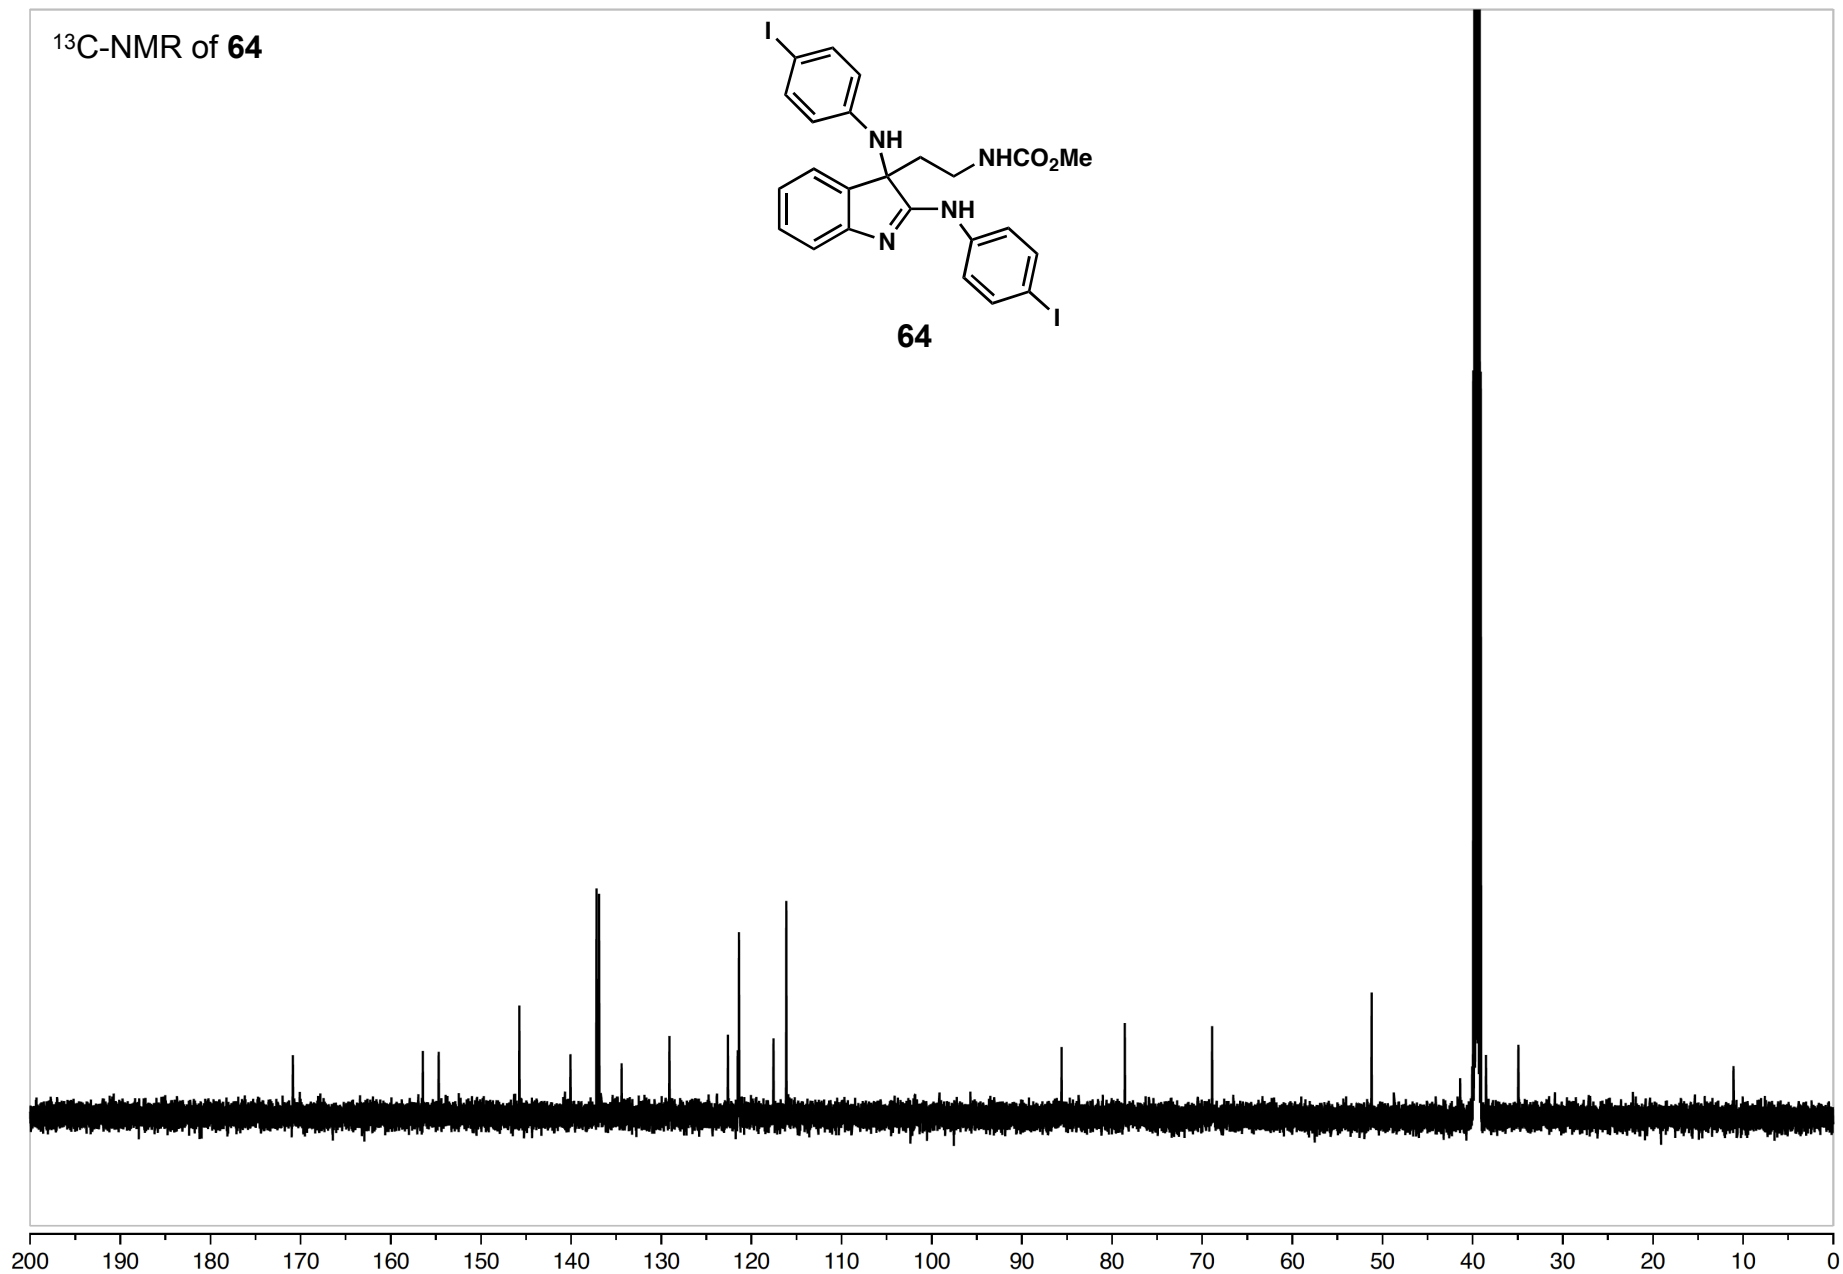

<sup>1</sup>H-NMR of **65**

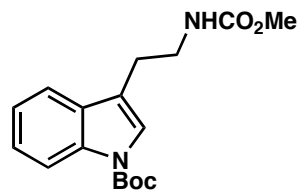

**65**

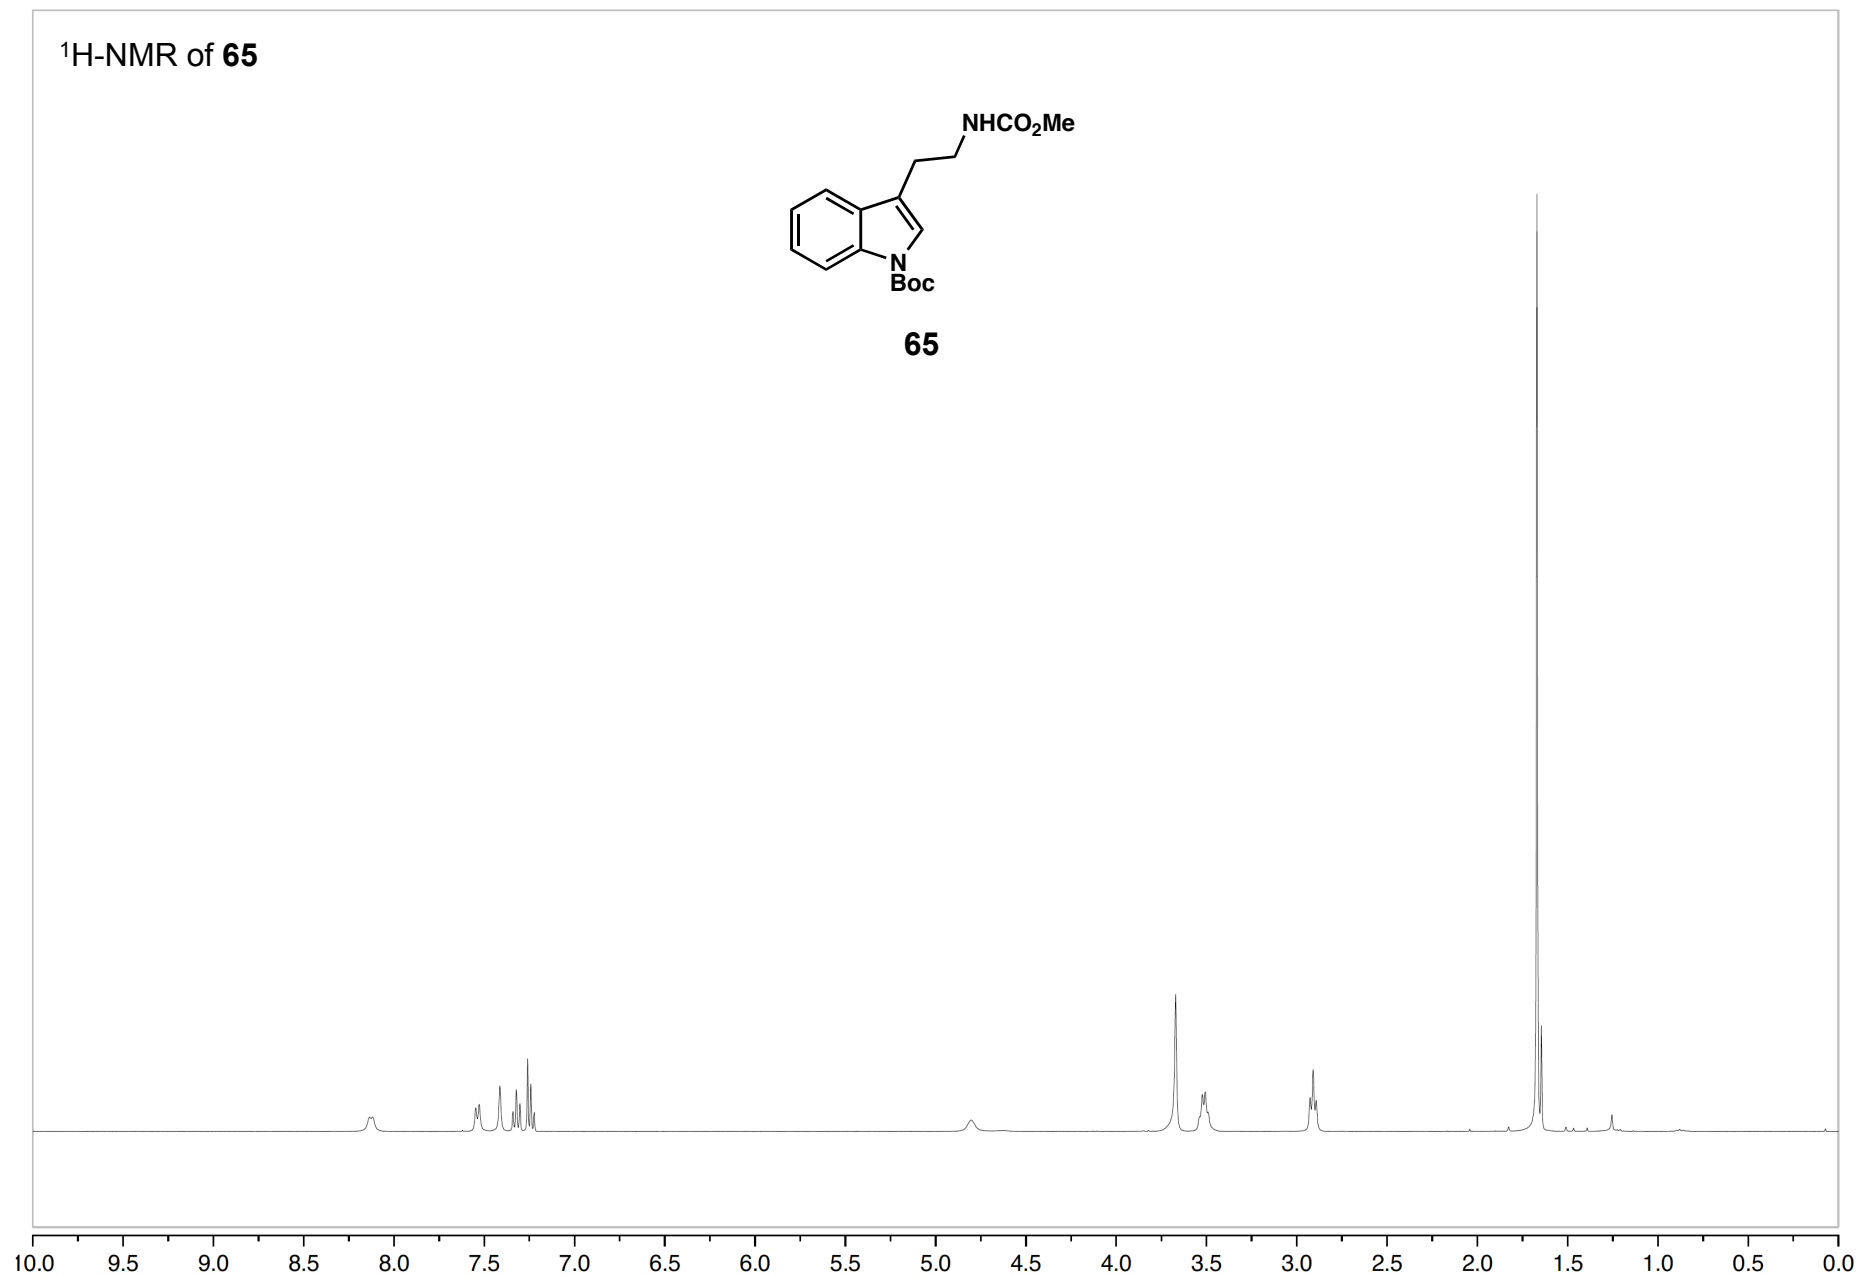

<sup>13</sup>C-NMR of **65**

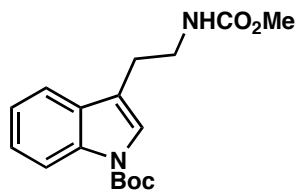

**65**

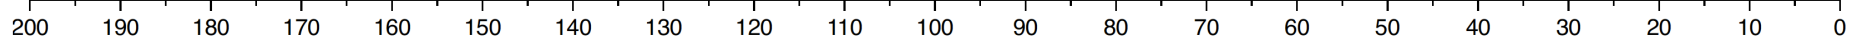

<sup>1</sup>H-NMR of **66**

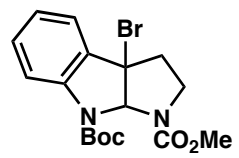

**66**

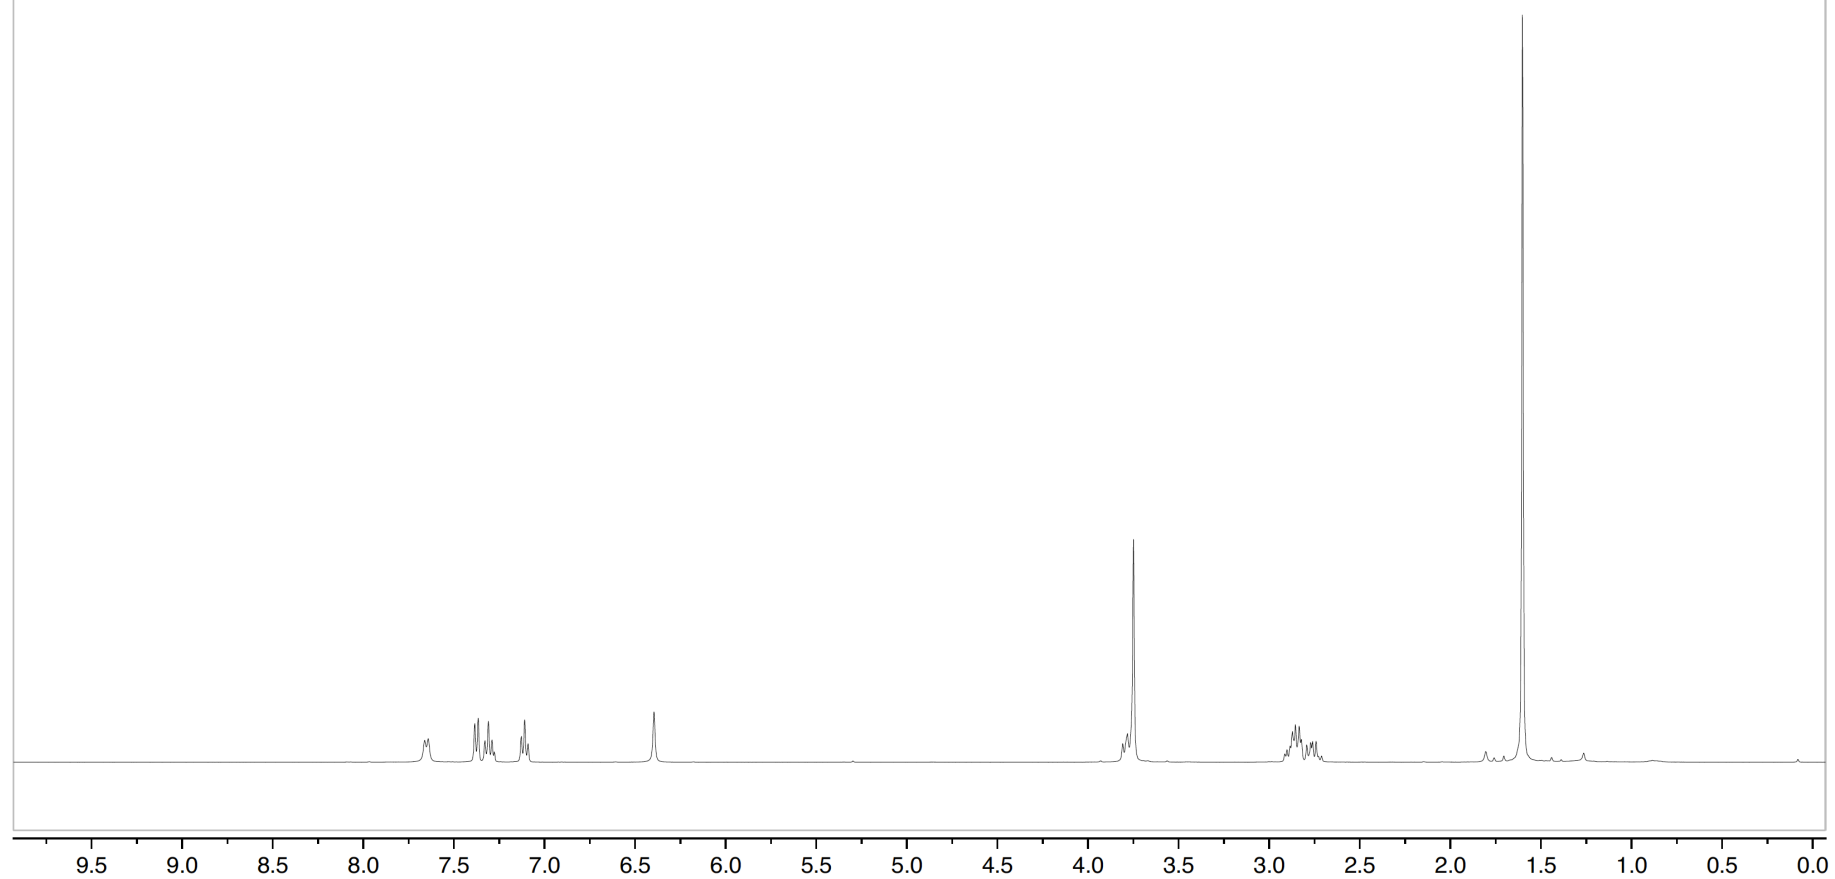

<sup>13</sup>C-NMR of **66**

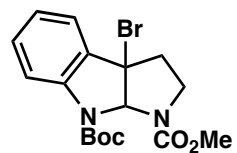

**66**

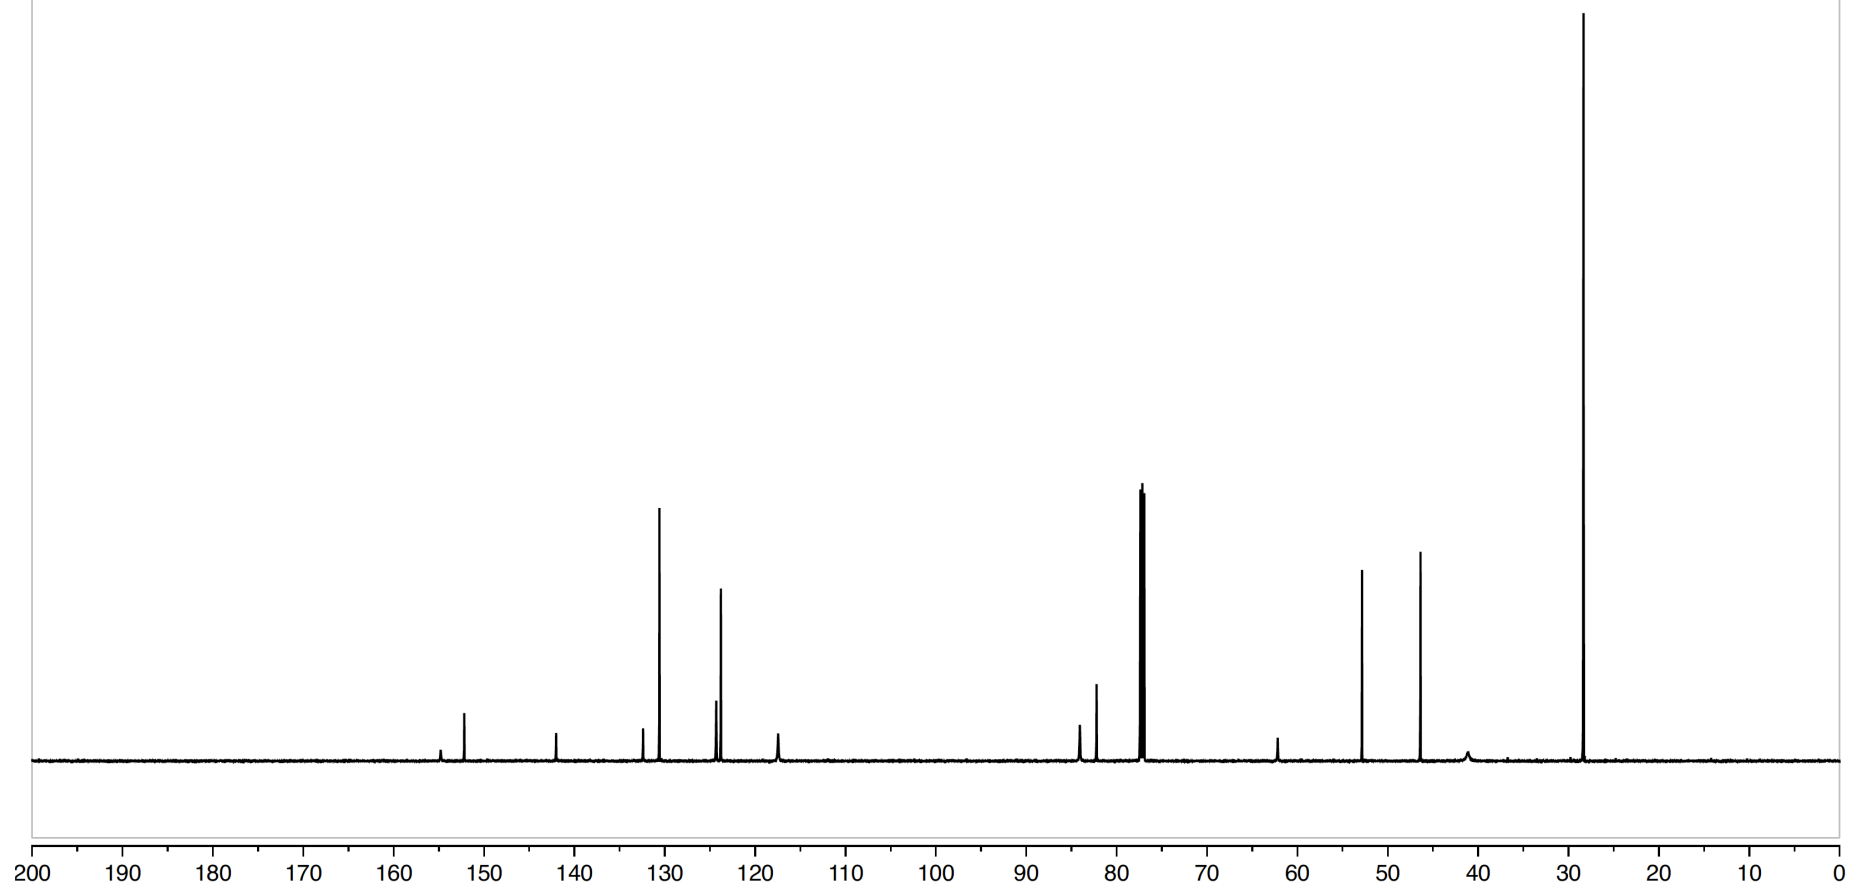

<sup>1</sup>H-NMR of **67**

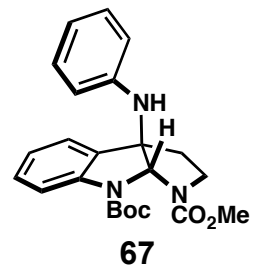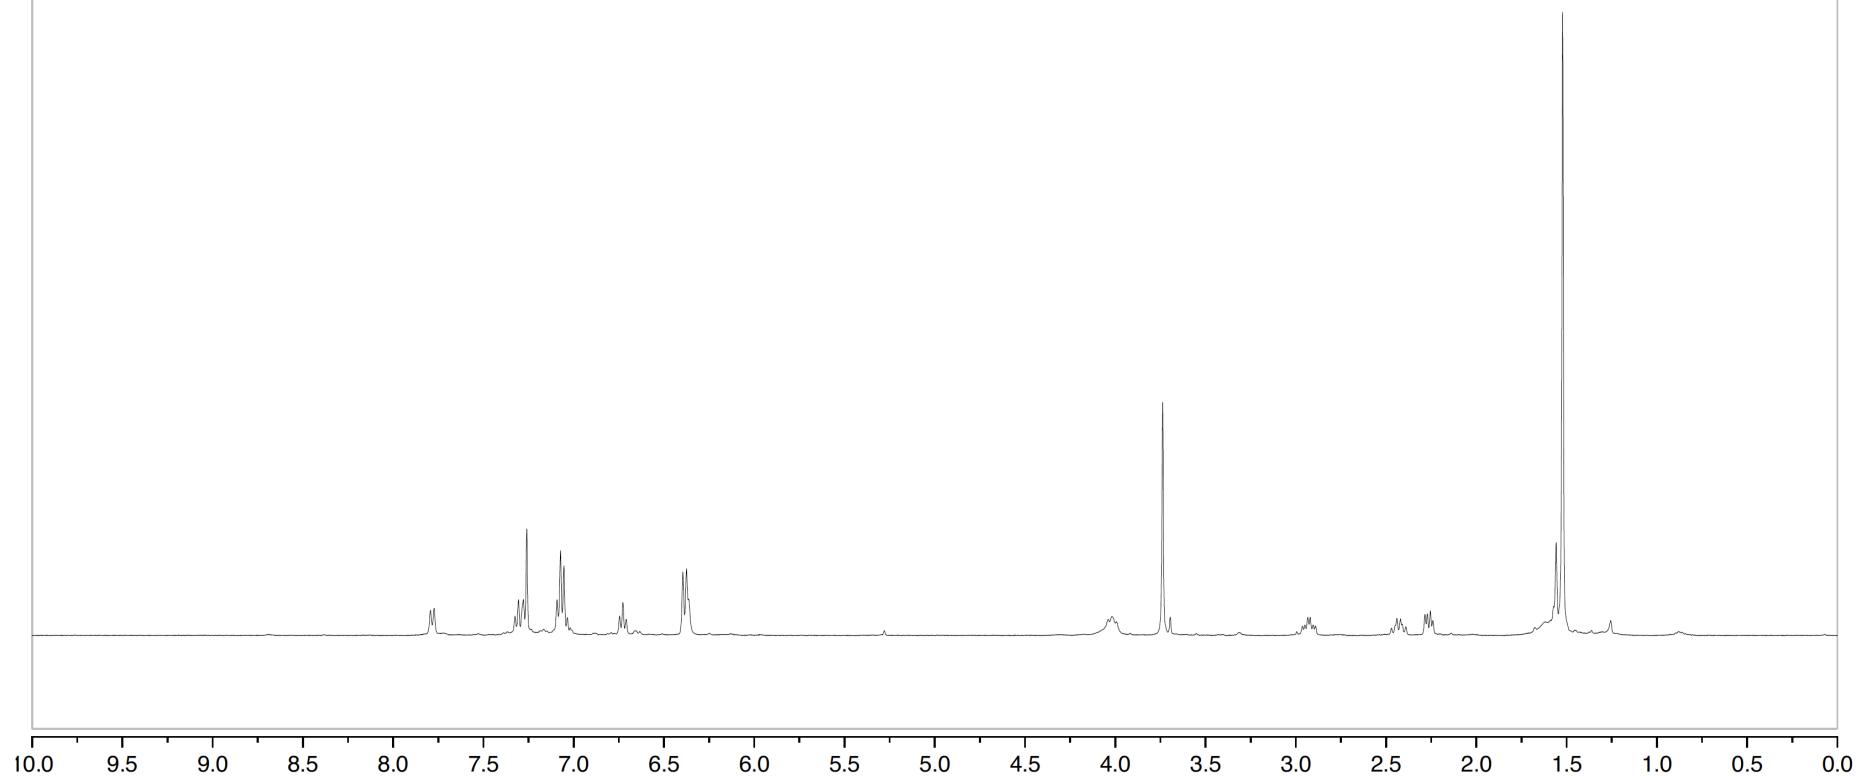



<sup>13</sup>C-NMR of **67**

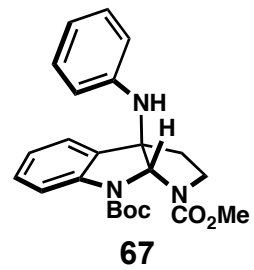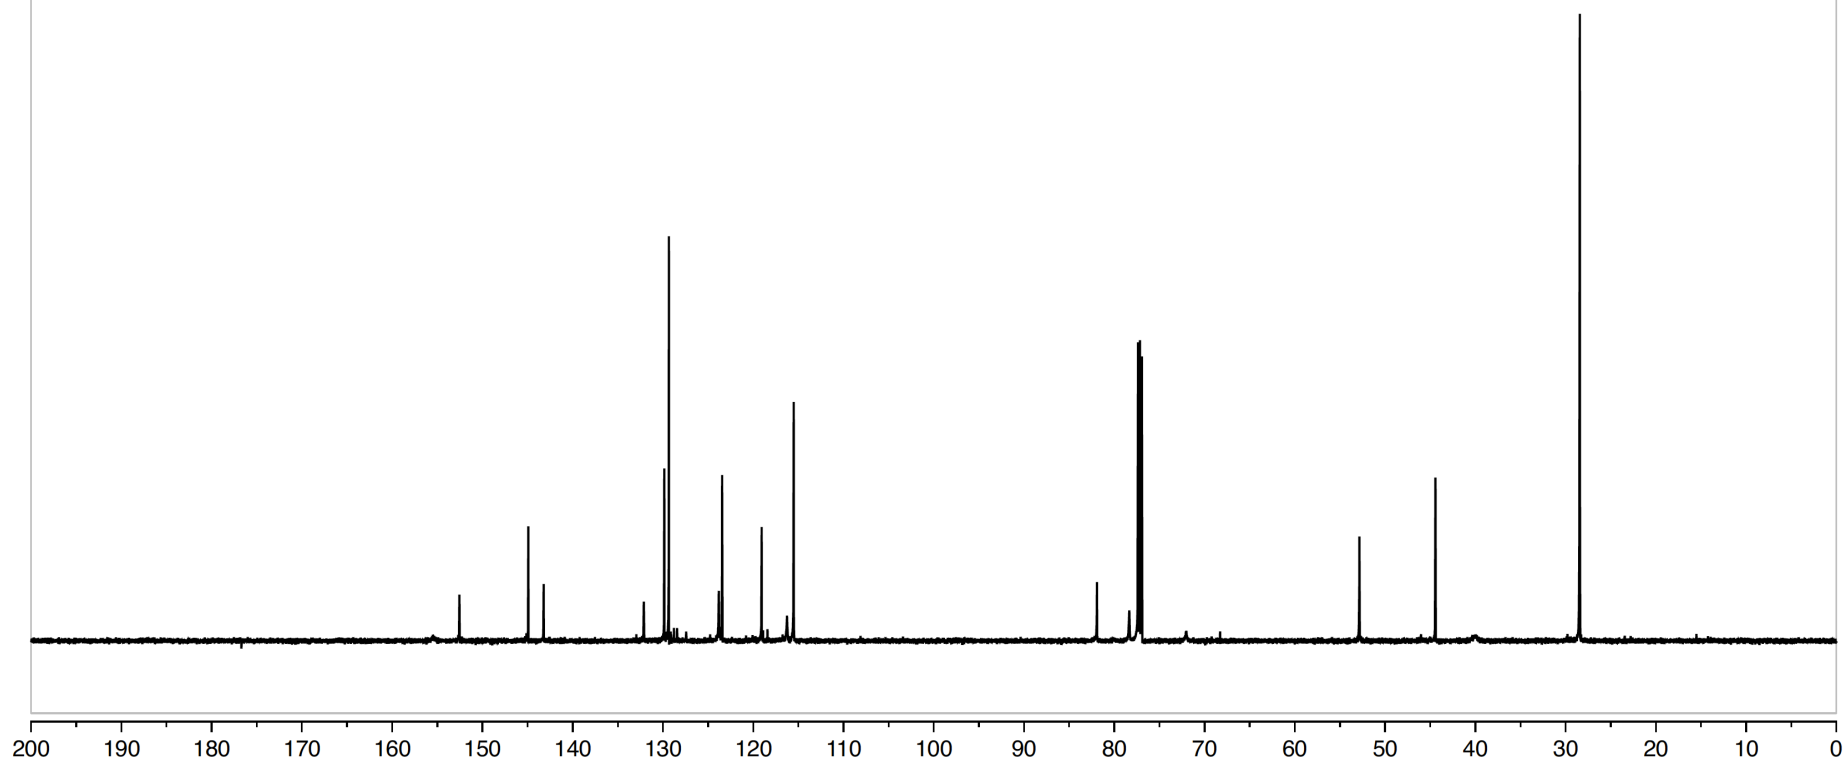

HMQC of **67**

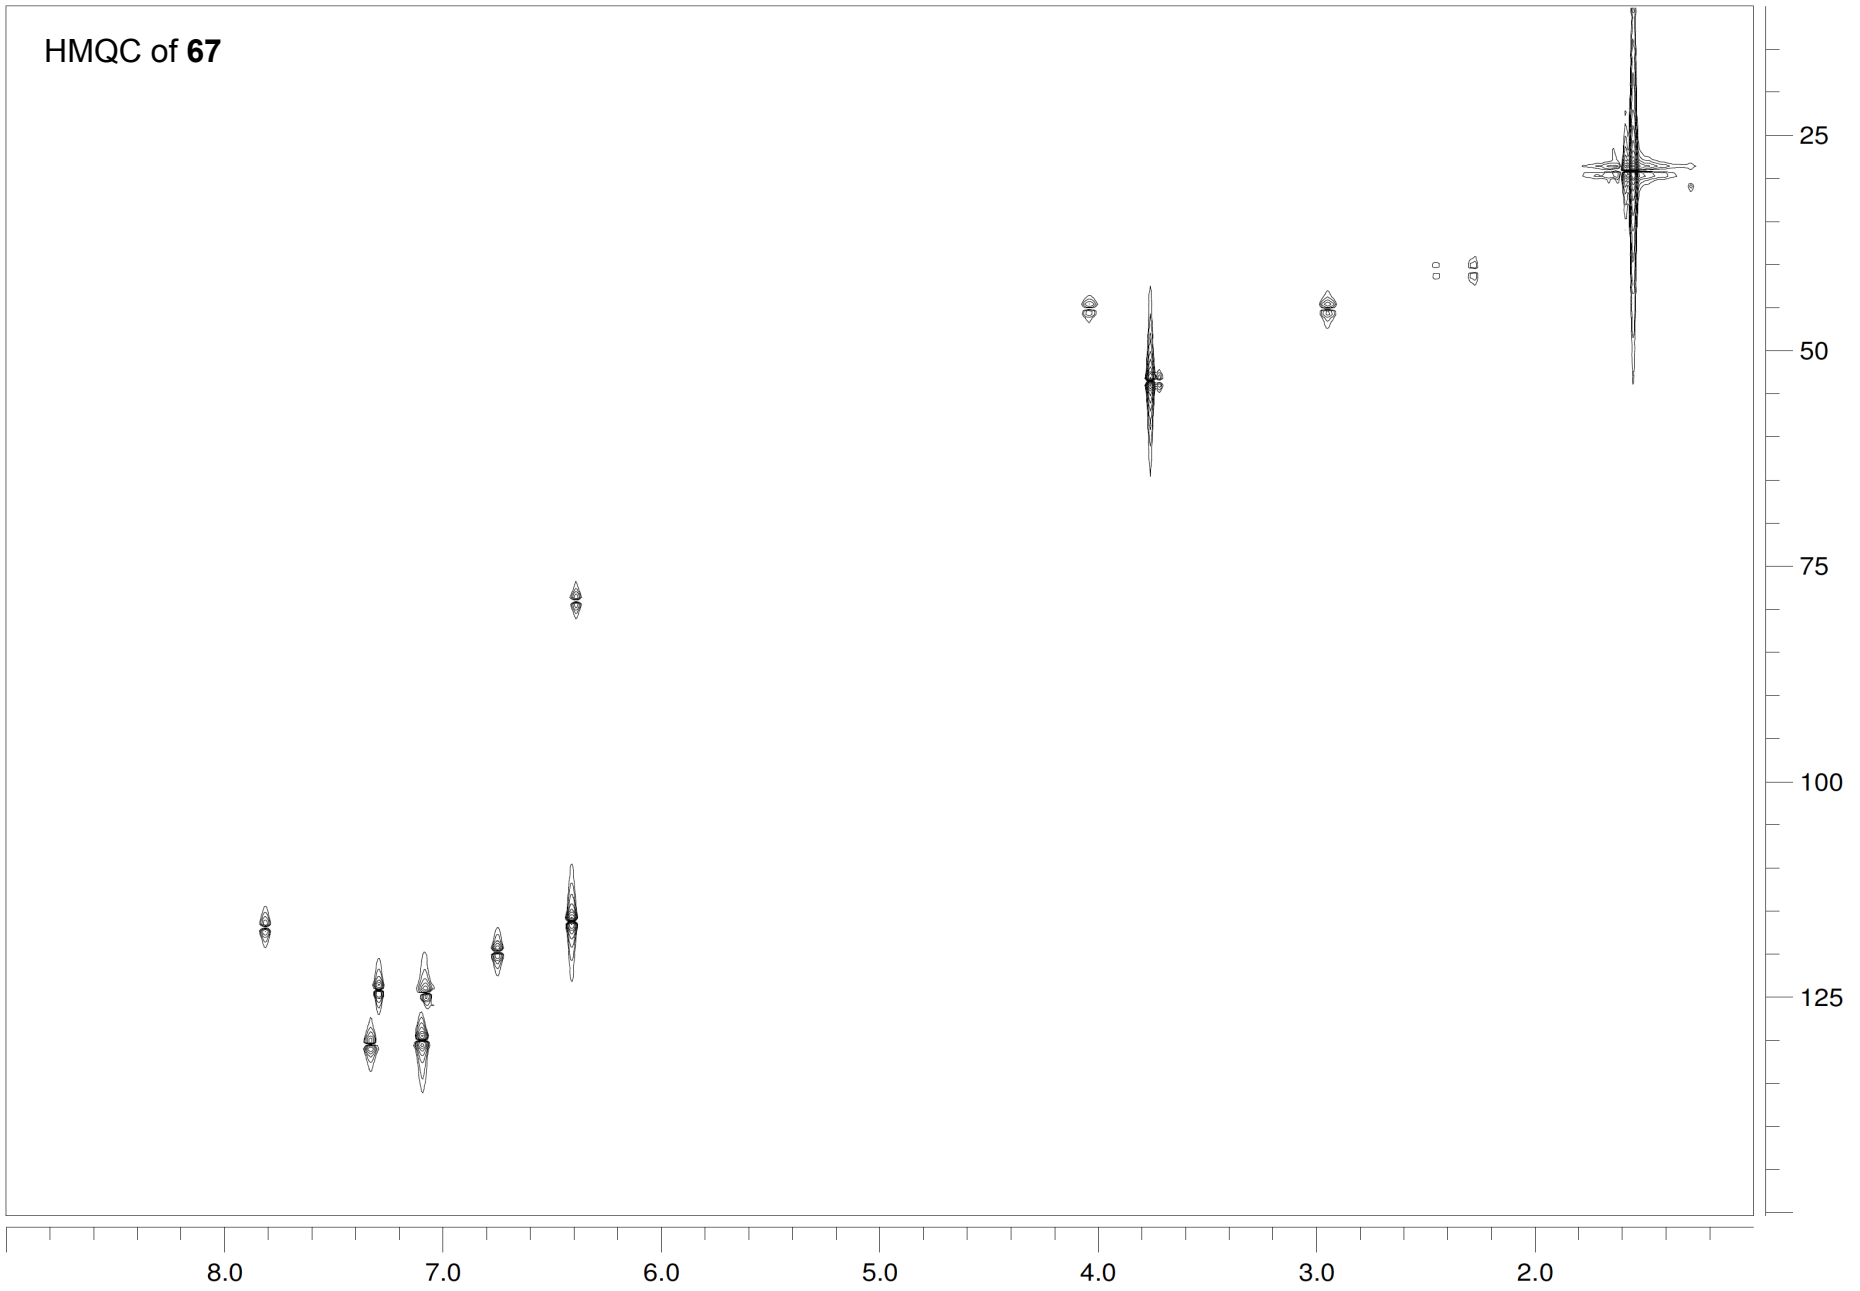

S-112

<sup>1</sup>H-NMR of **69**

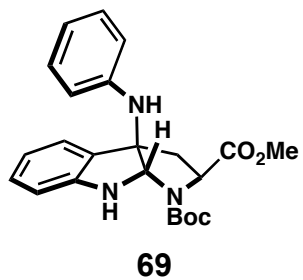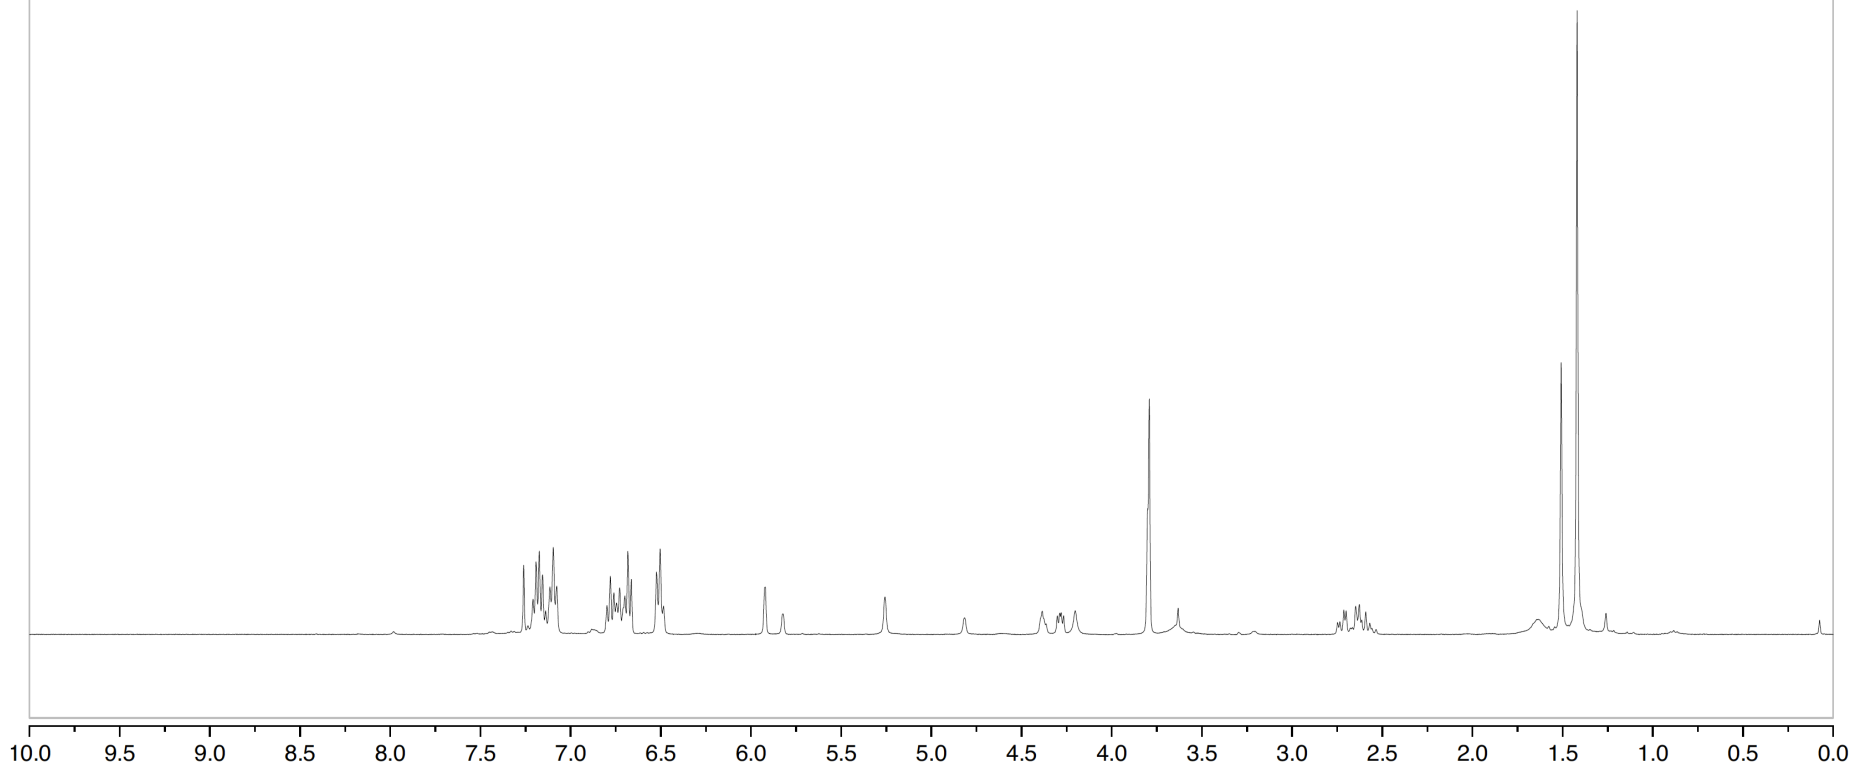

<sup>13</sup>C-NMR of **69**

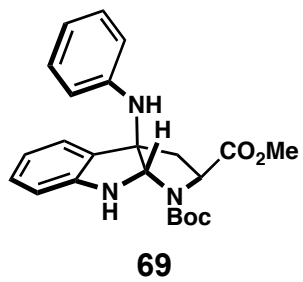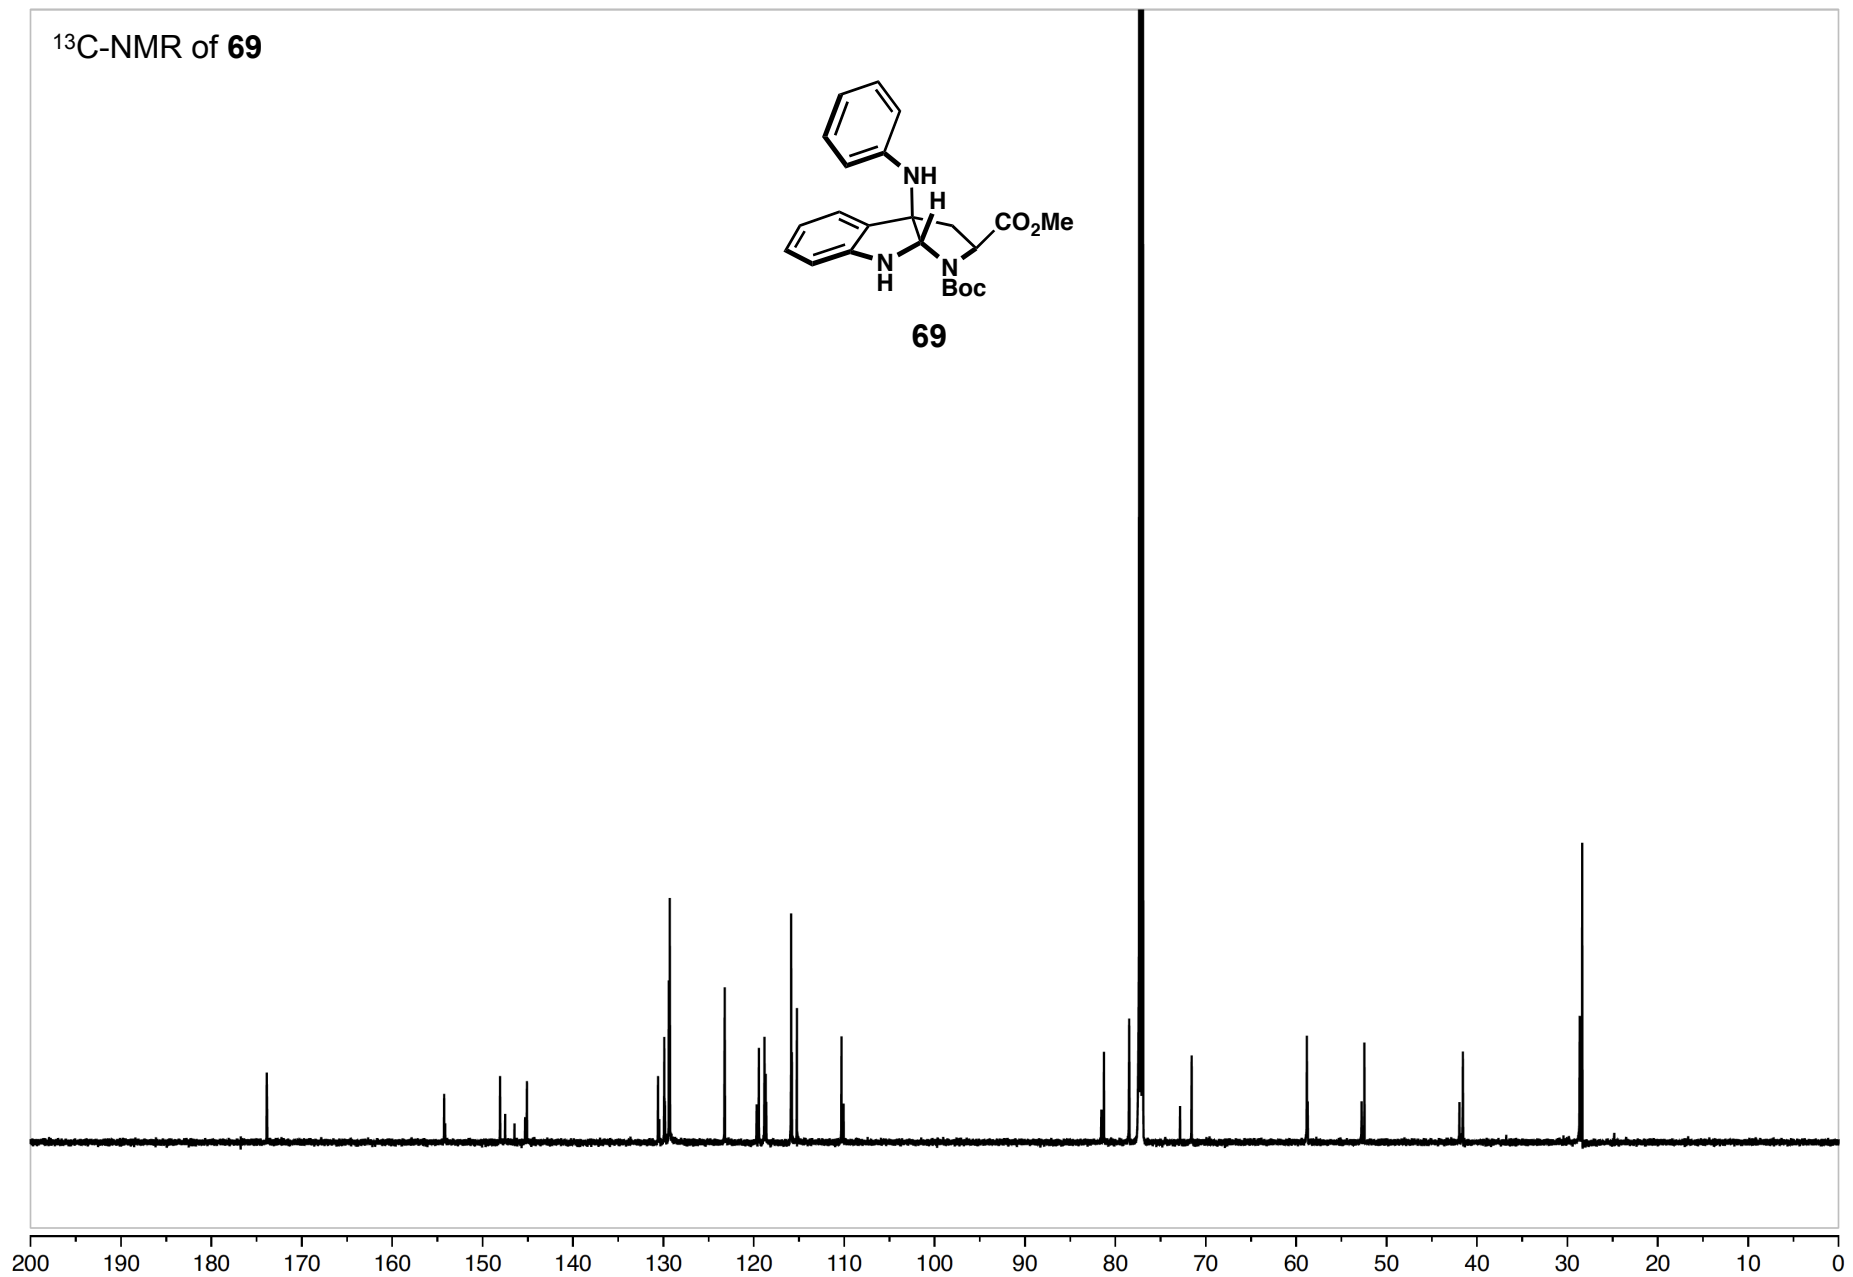

HMQC of **69**

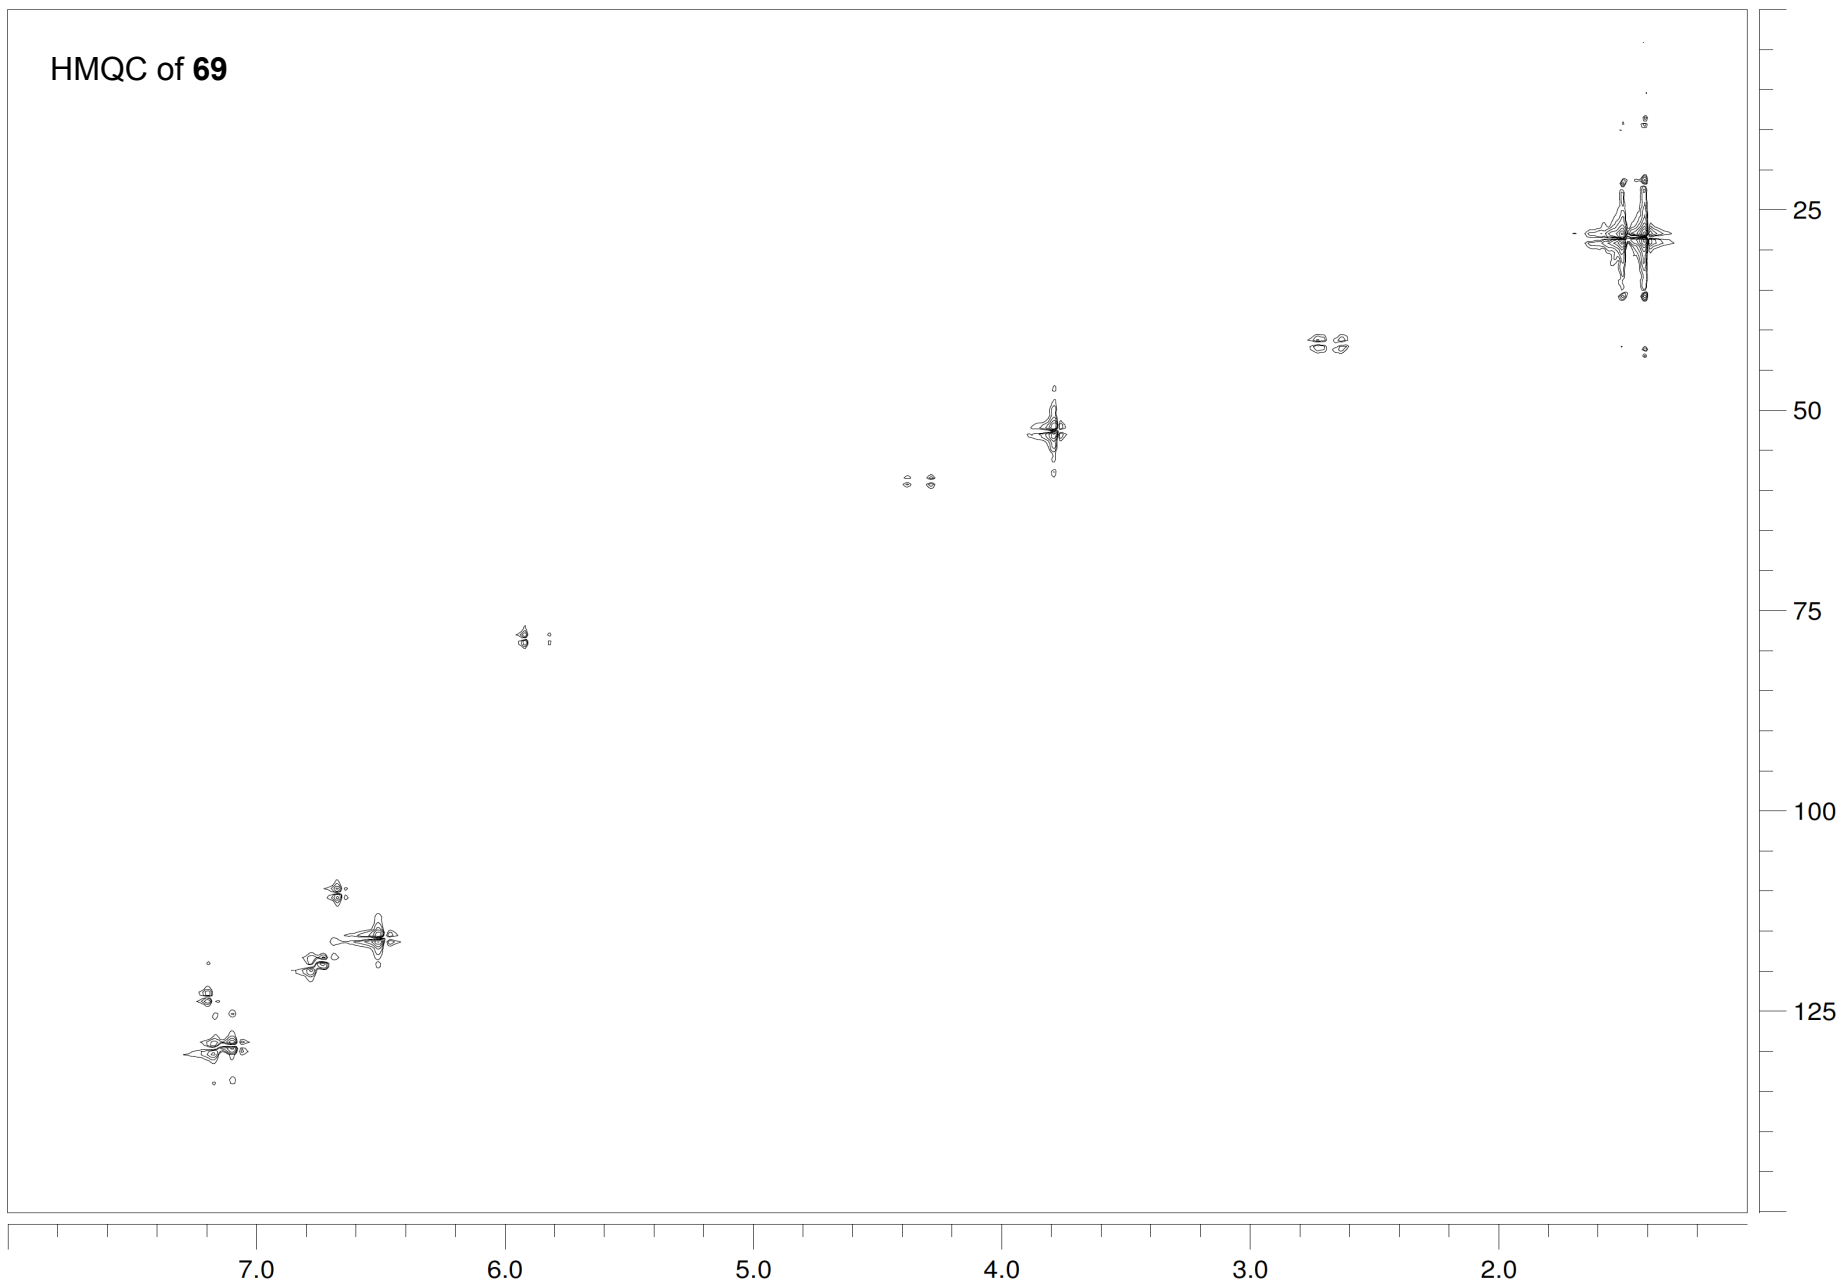

S-115

<sup>1</sup>H-NMR of **90**

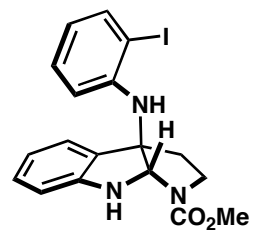

**90**

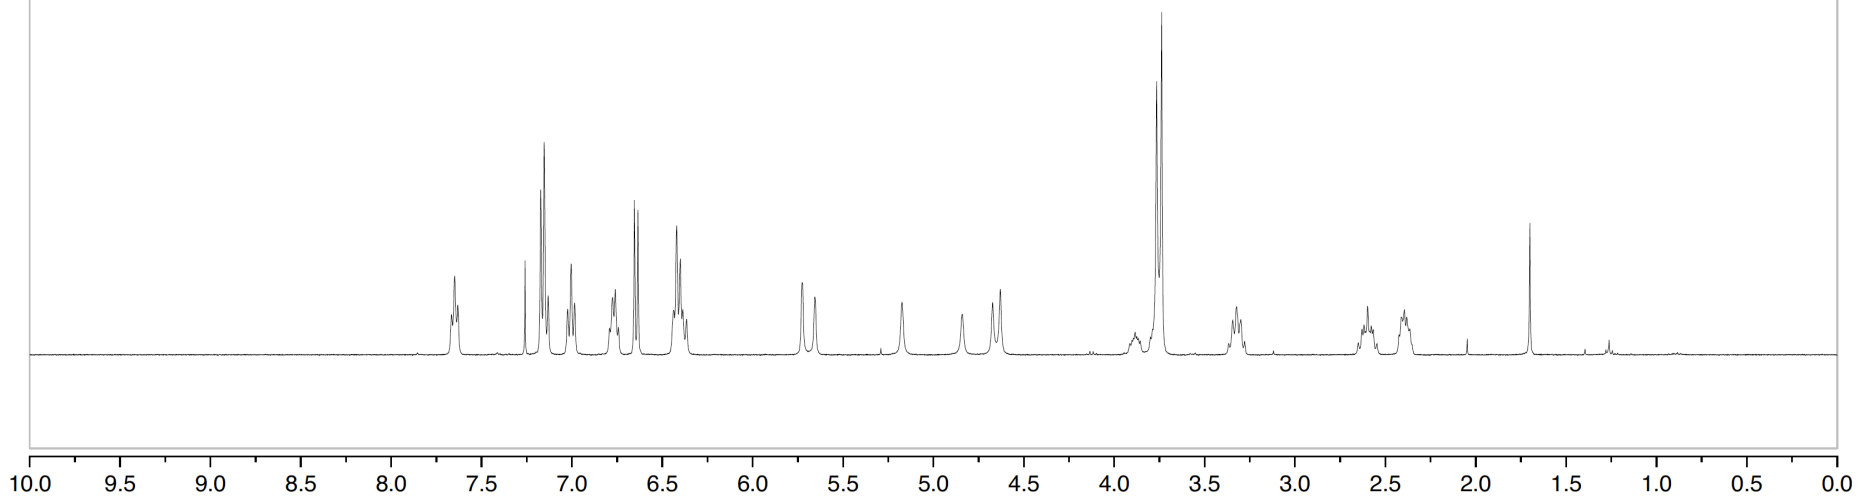

<sup>13</sup>C-NMR of **90**

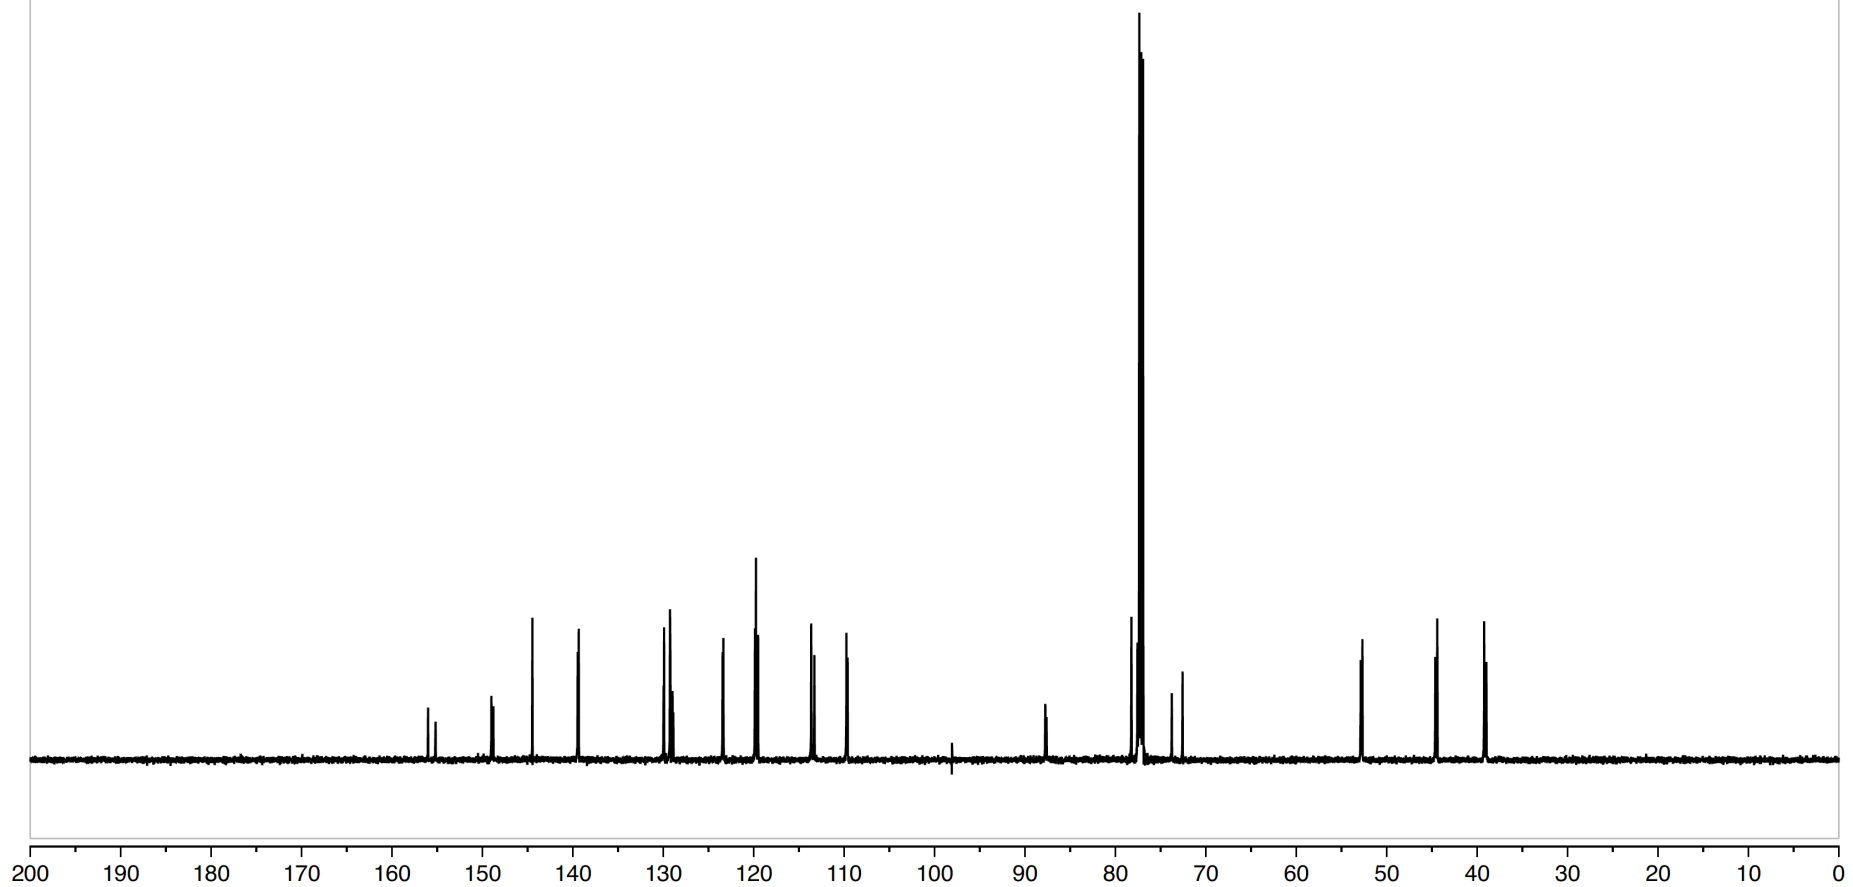

<sup>1</sup>H-NMR of **91**

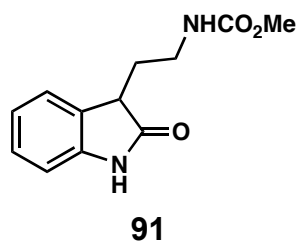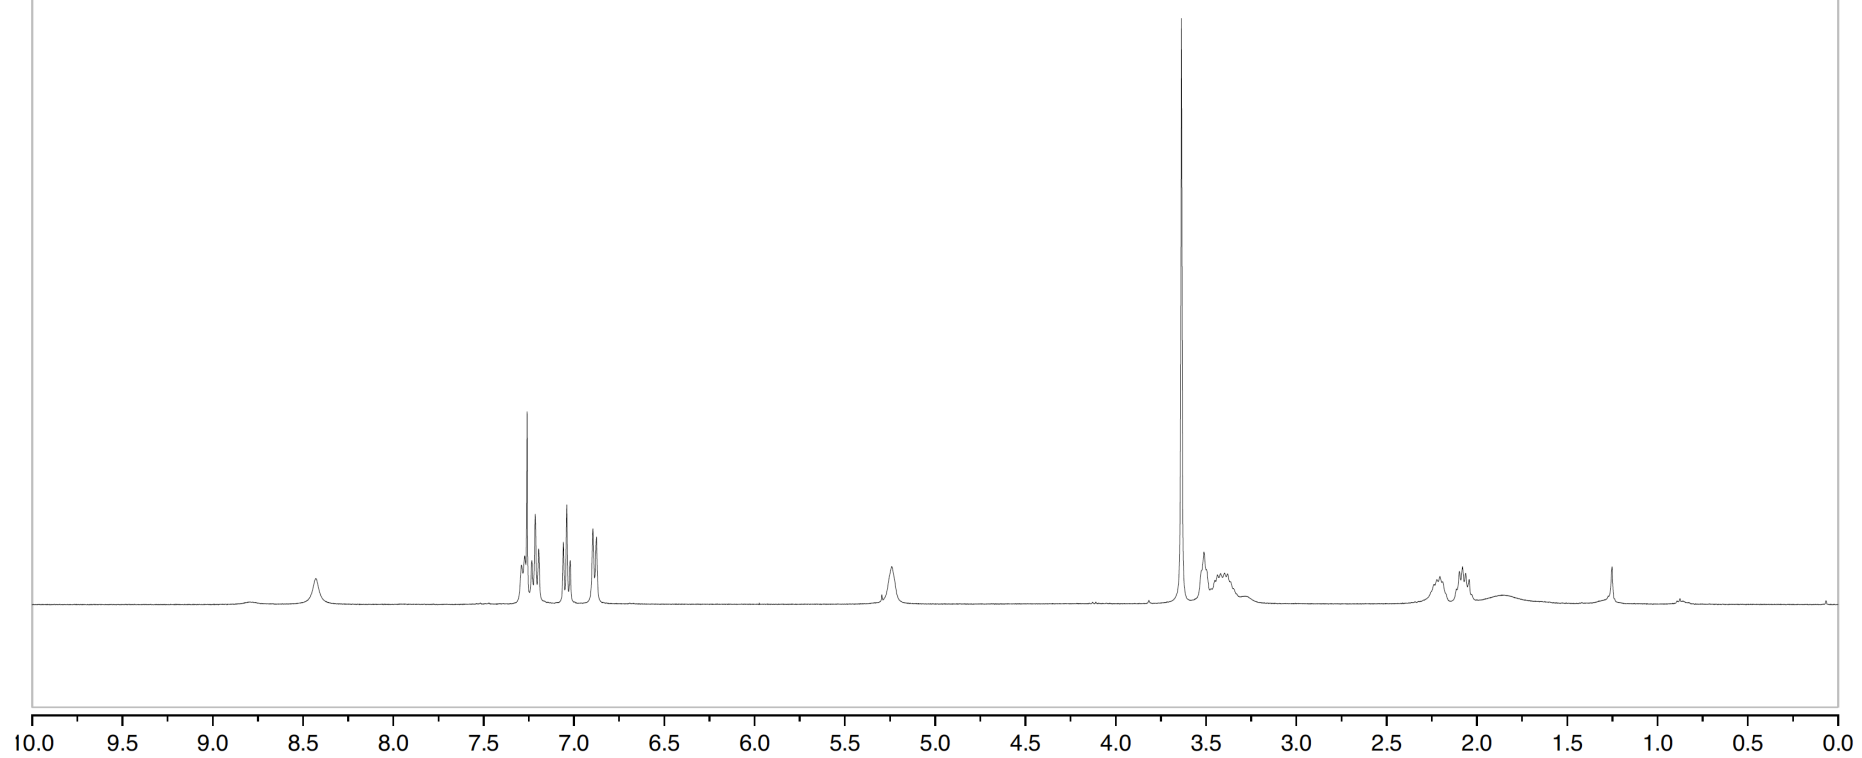



<sup>13</sup>C-NMR of **91**

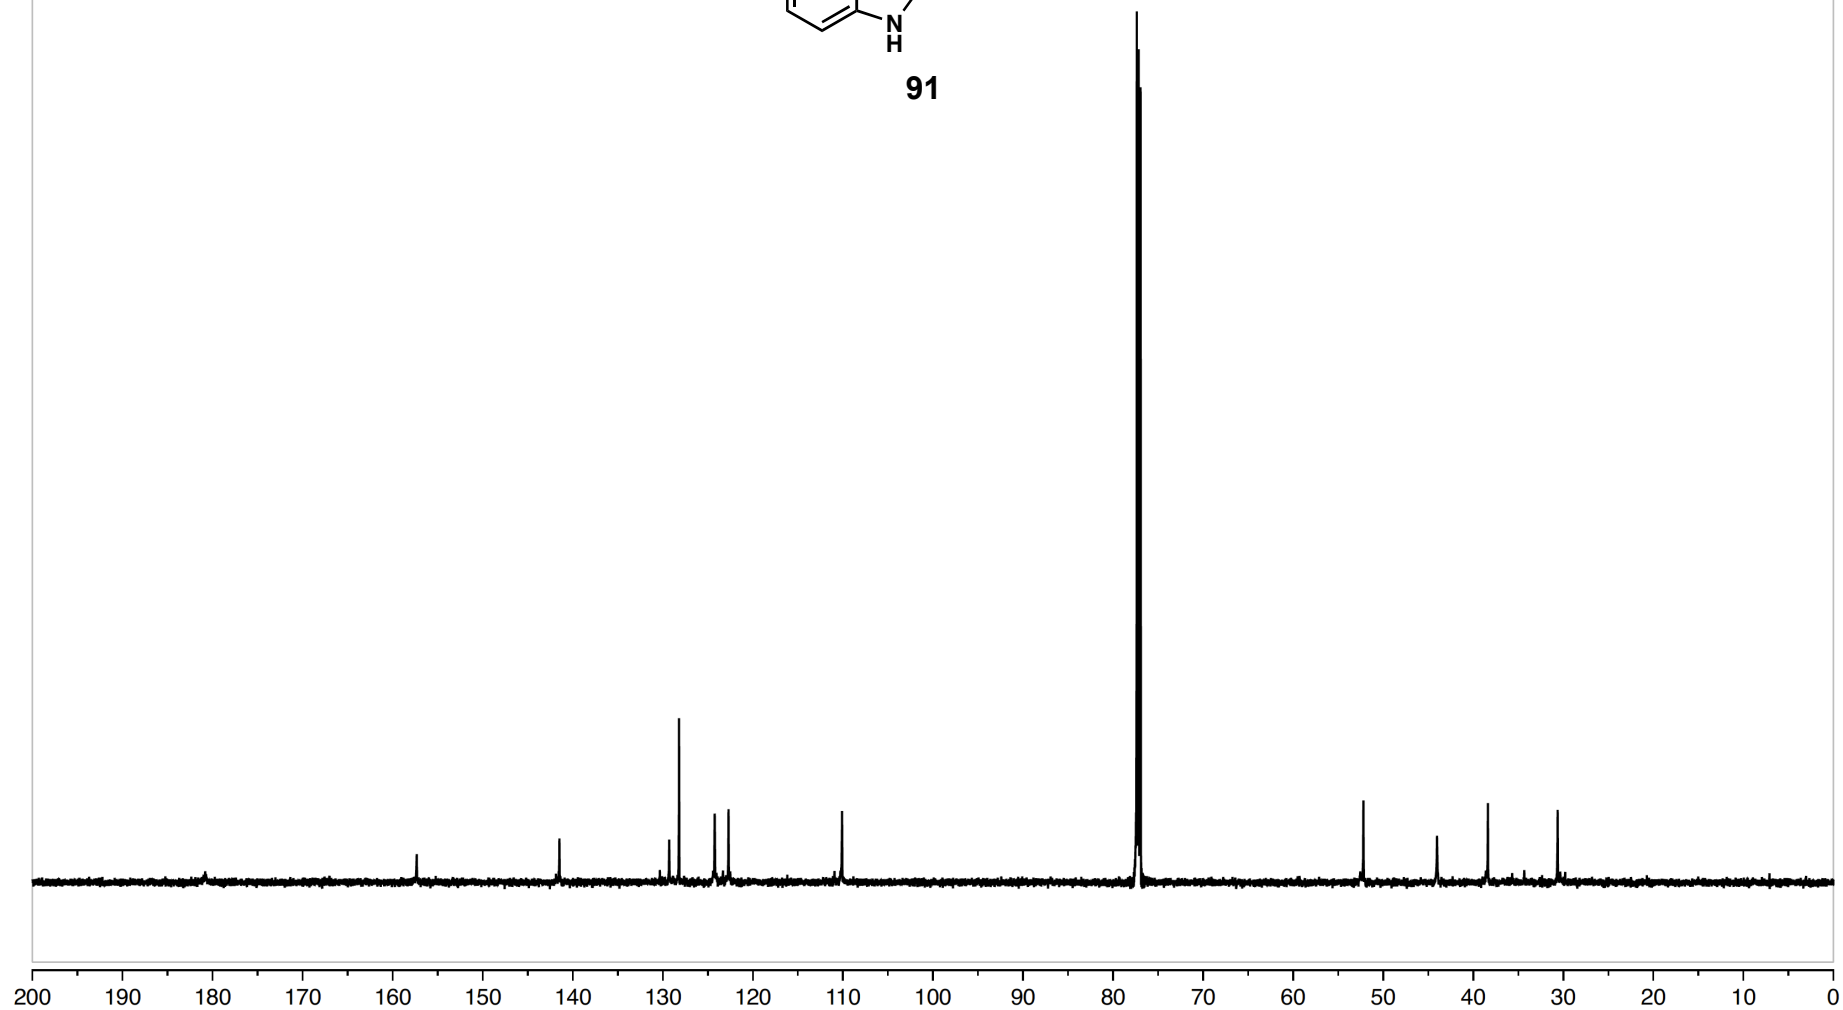

<sup>1</sup>H-NMR of **96**

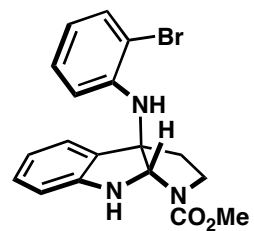

**96**

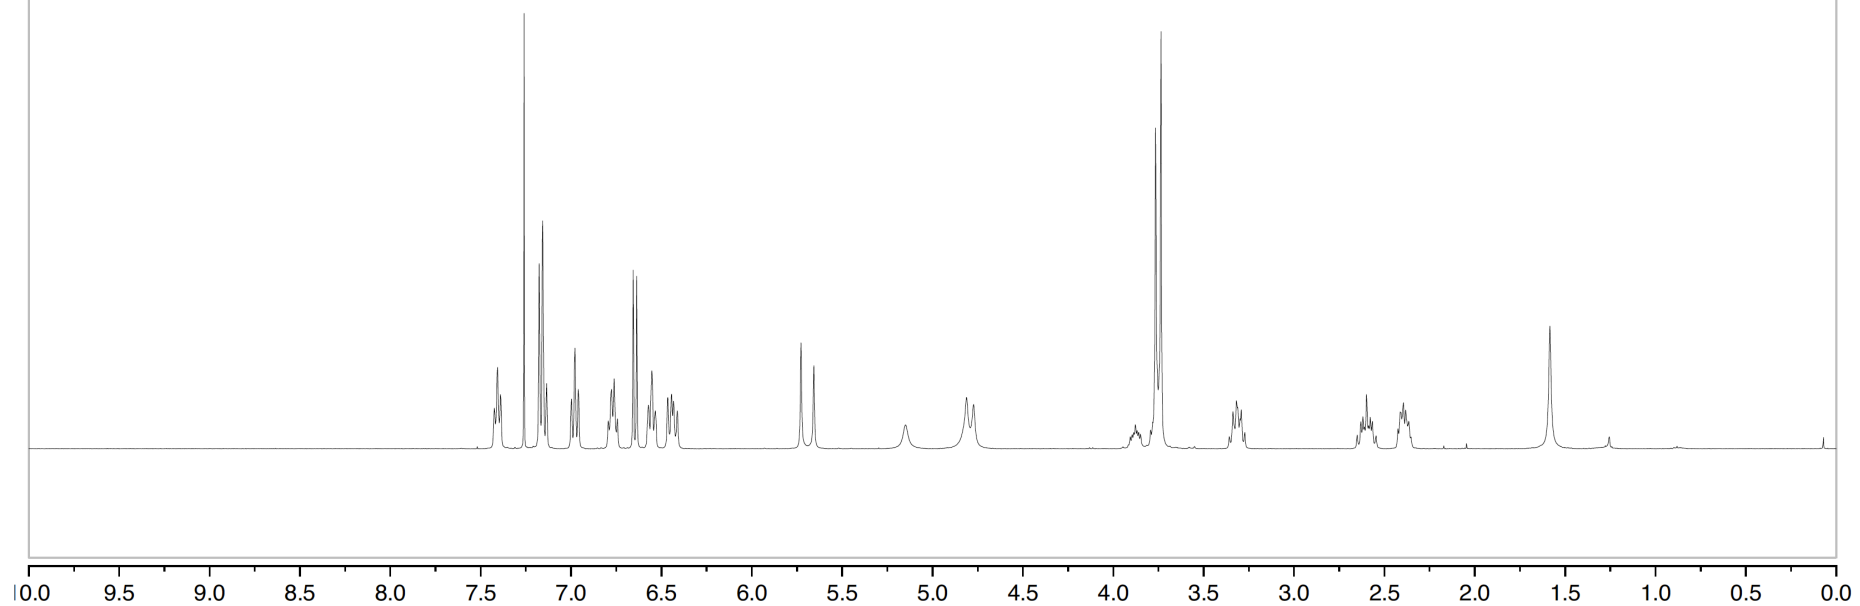

<sup>13</sup>C-NMR of **96**

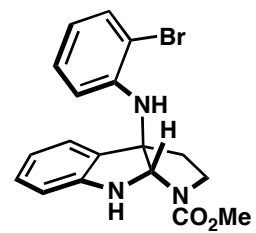

**96**

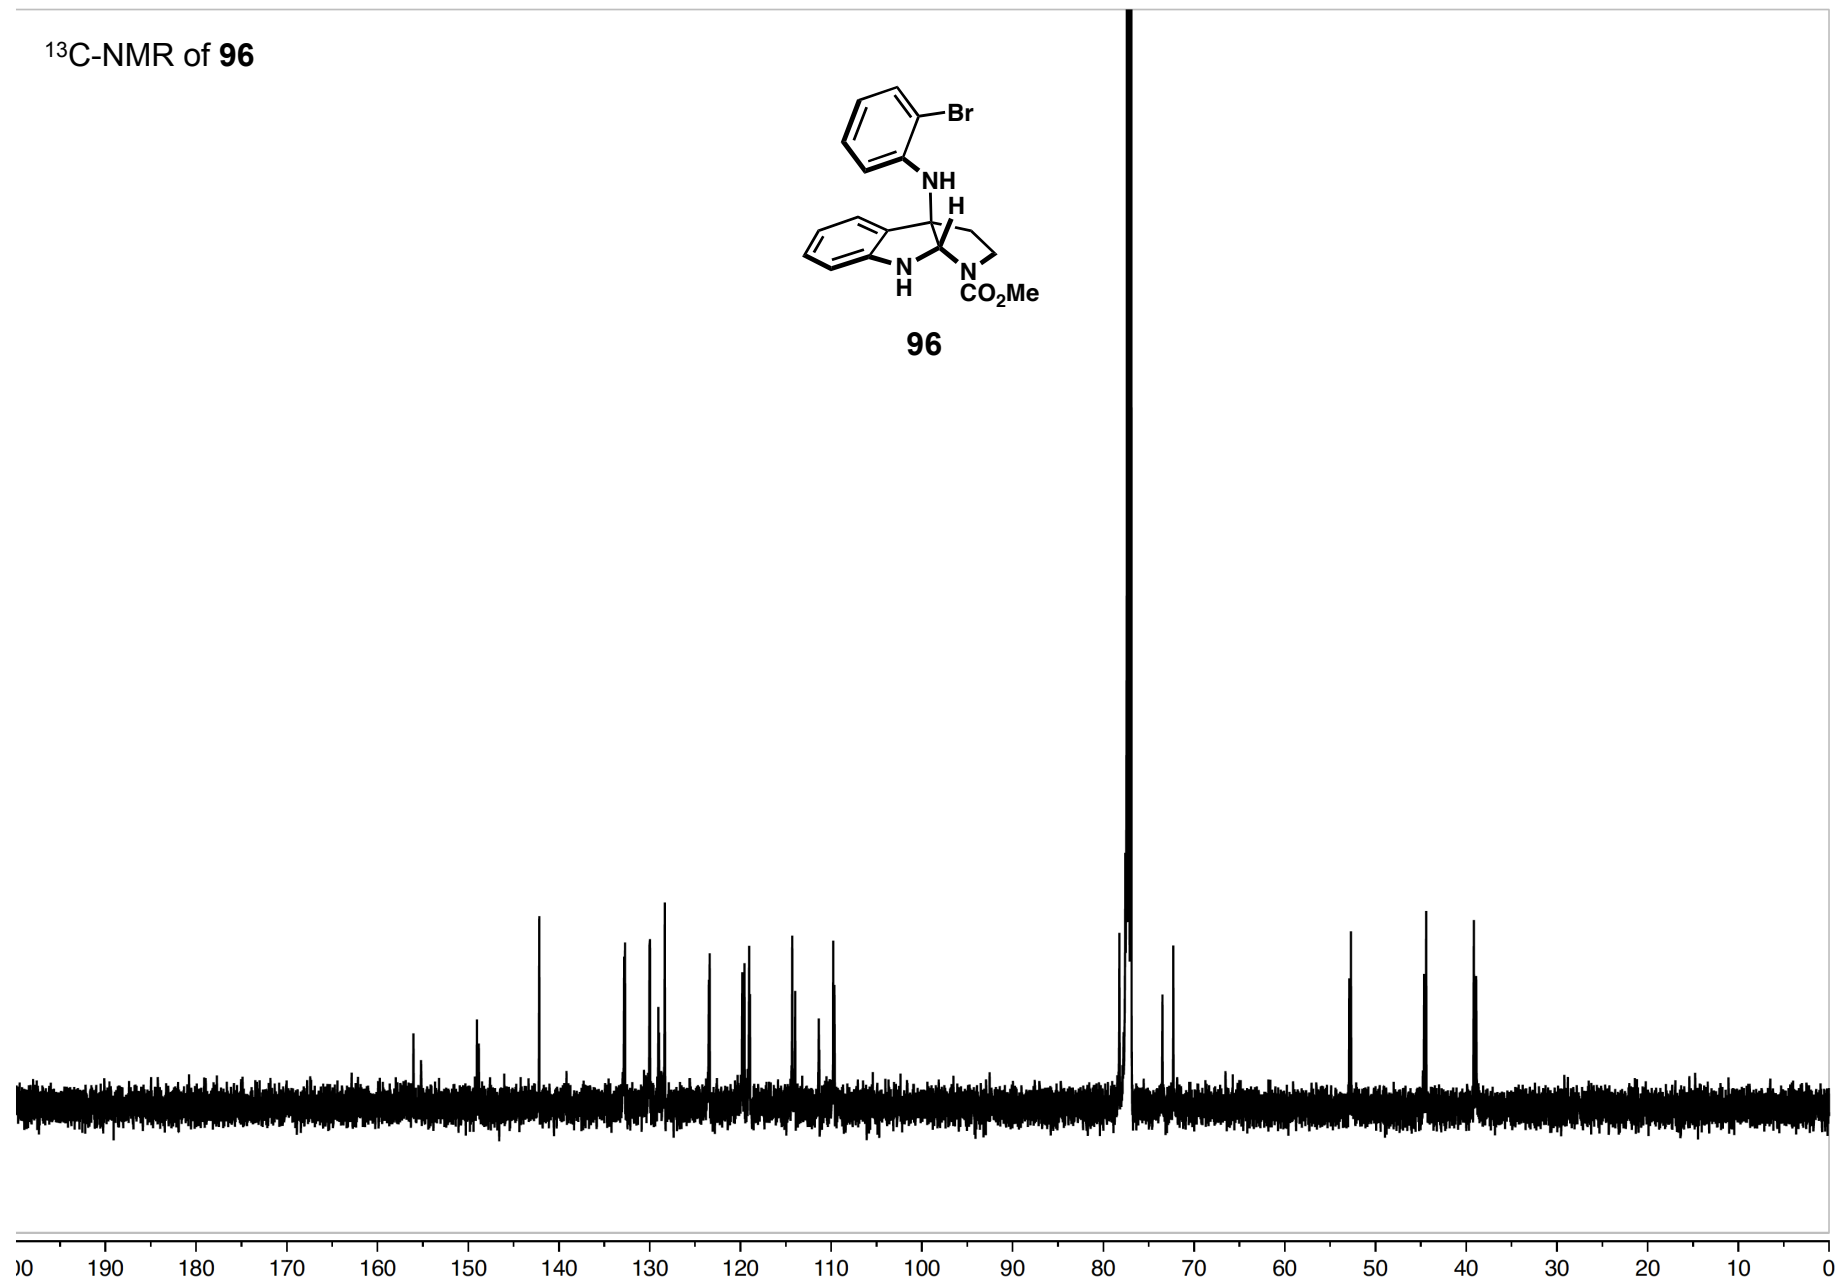

<sup>1</sup>H-NMR of **97**

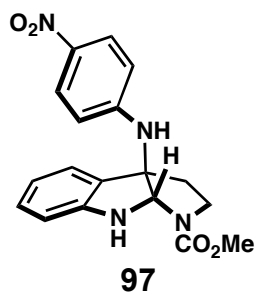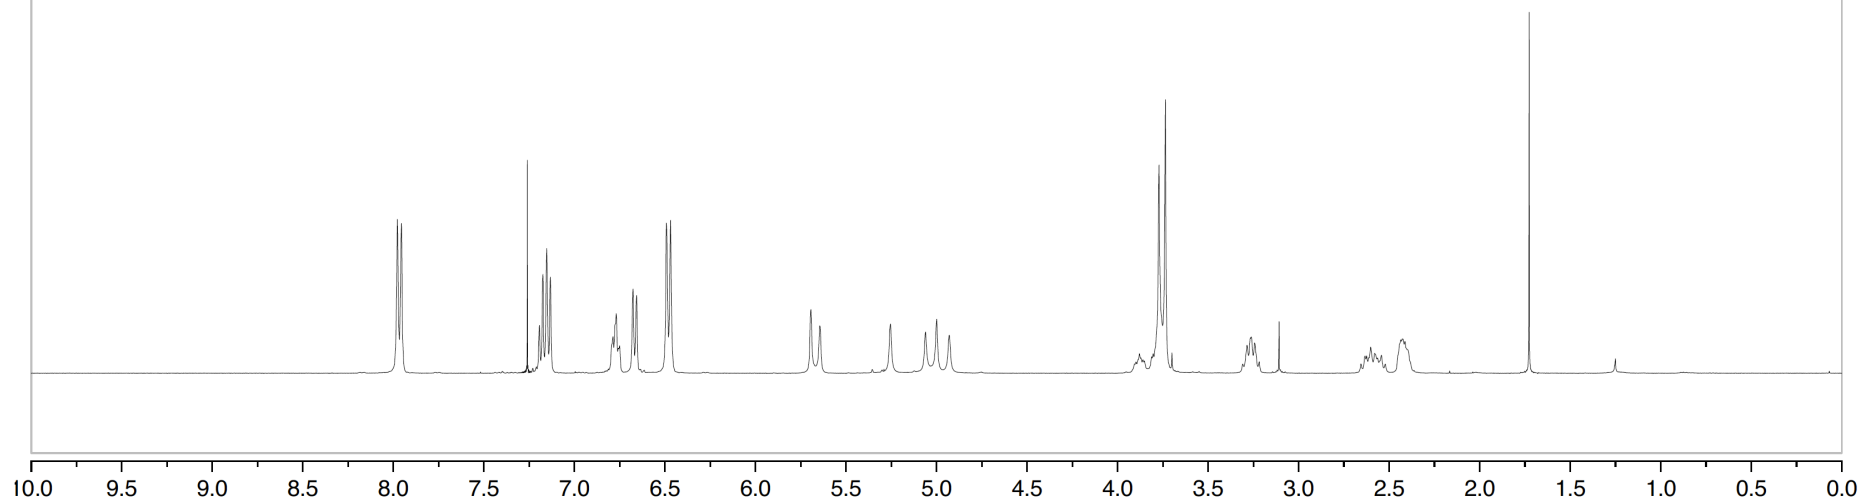

<sup>13</sup>C-NMR of **97**

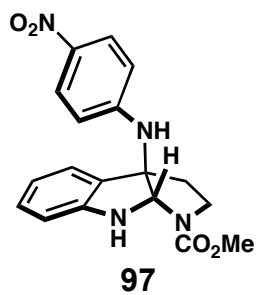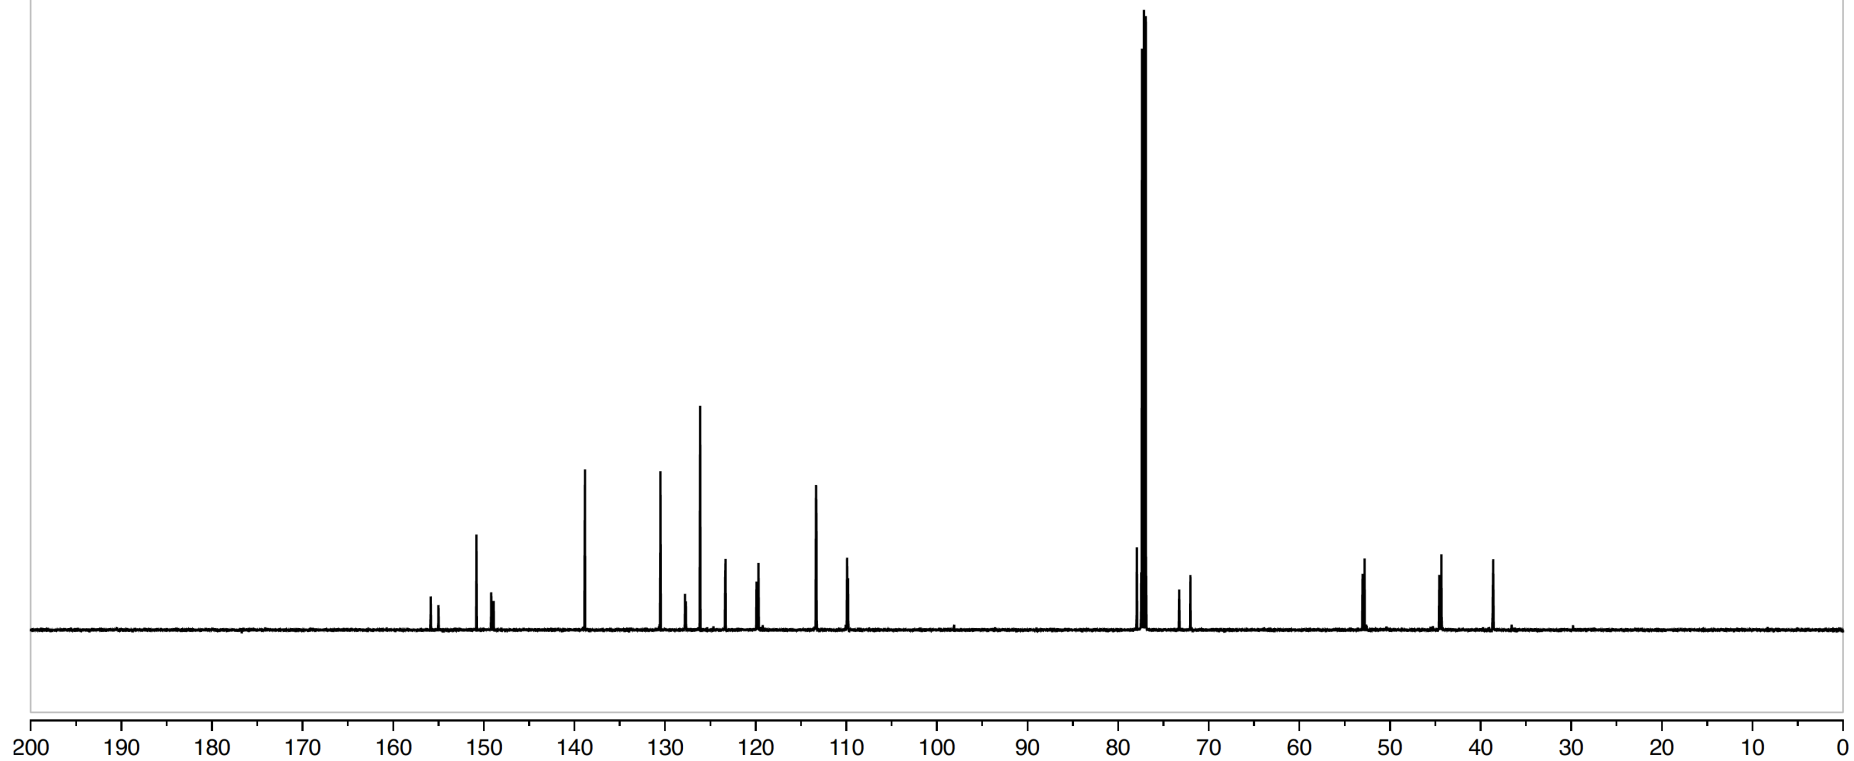

<sup>1</sup>H-NMR of **98**

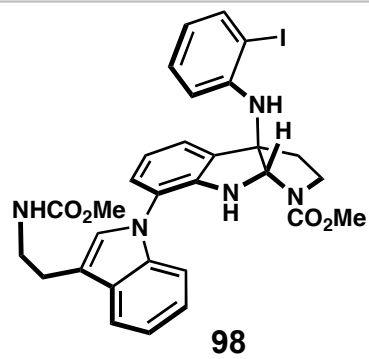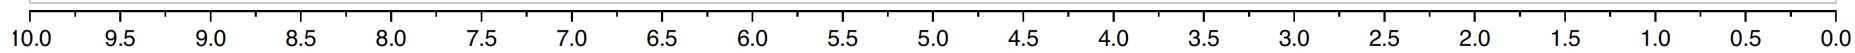

<sup>13</sup>C-NMR of **98**

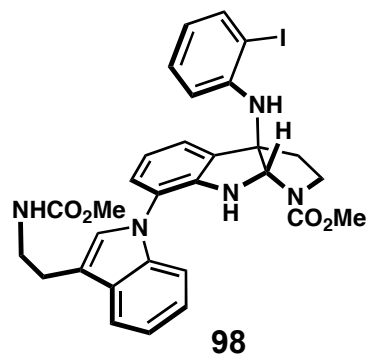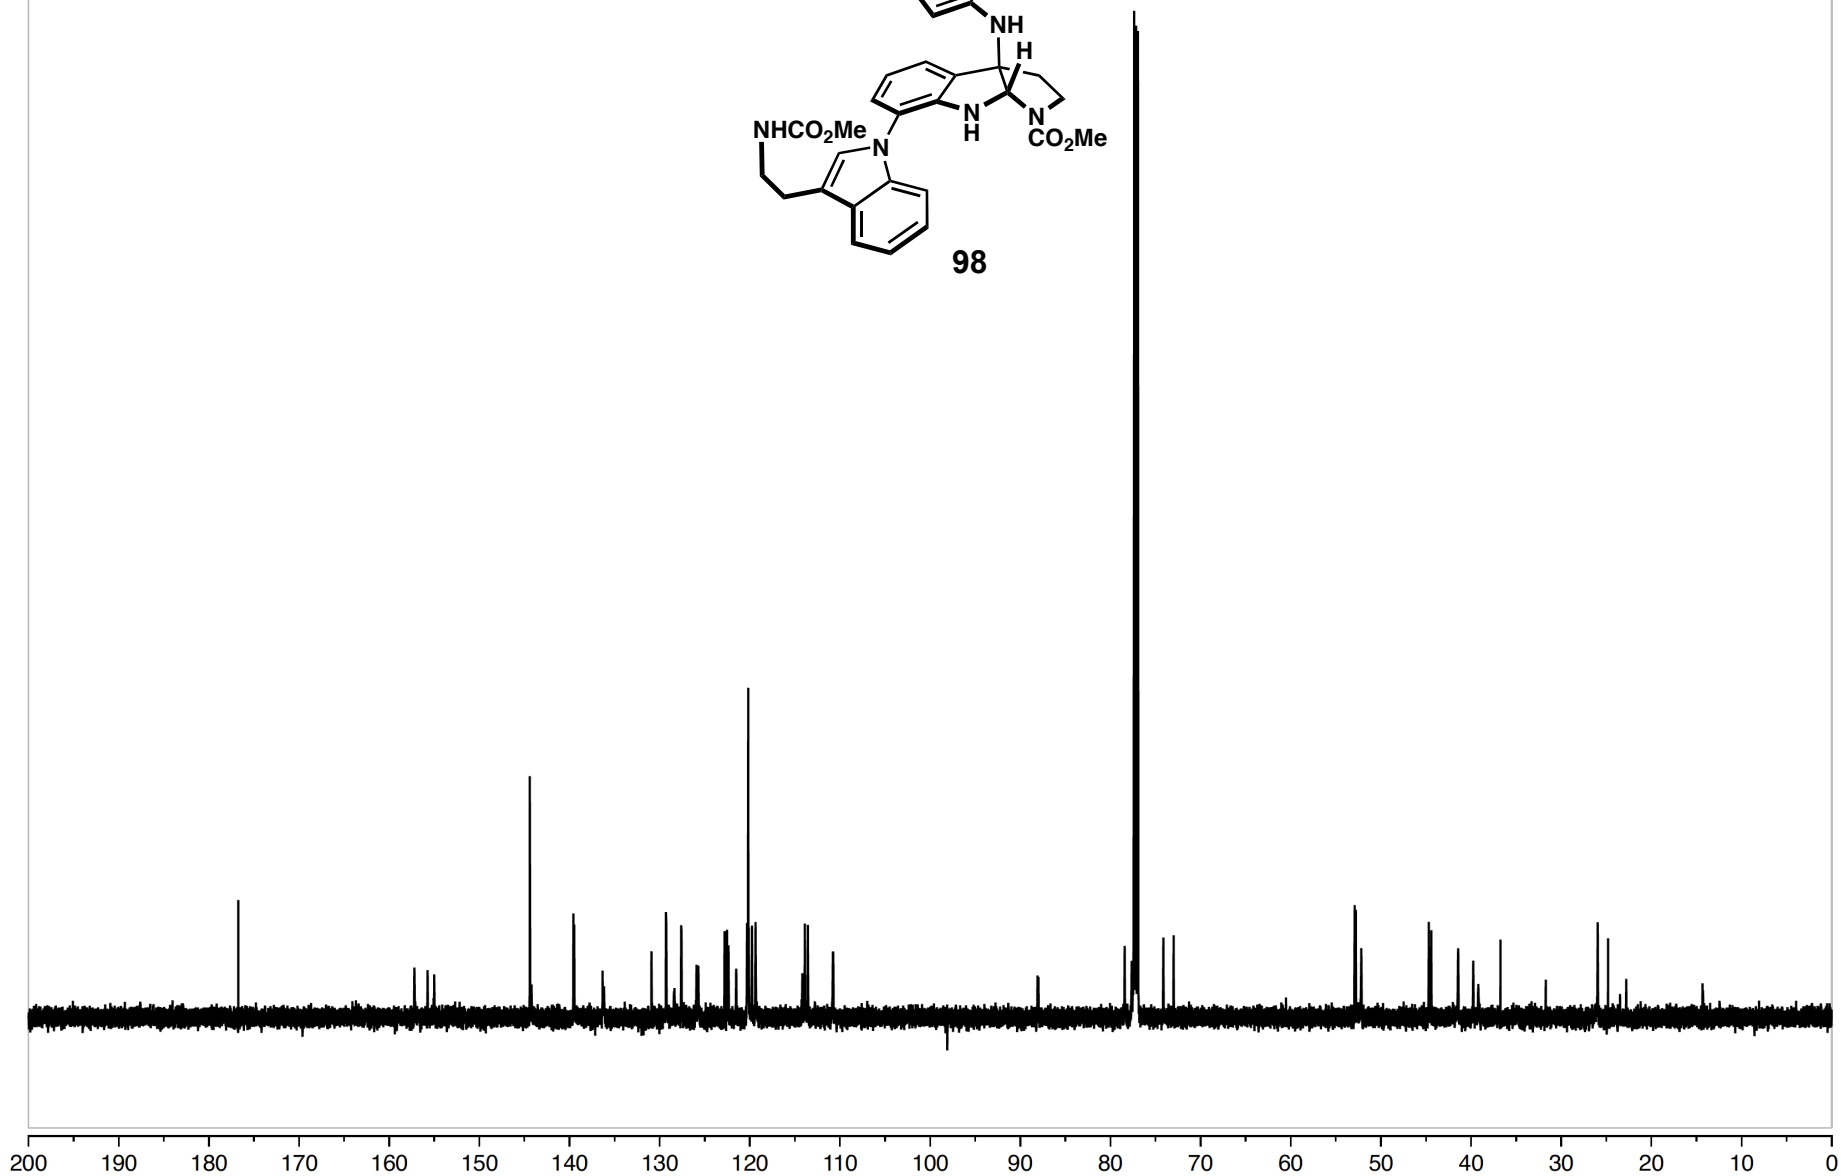

HMQC of 98

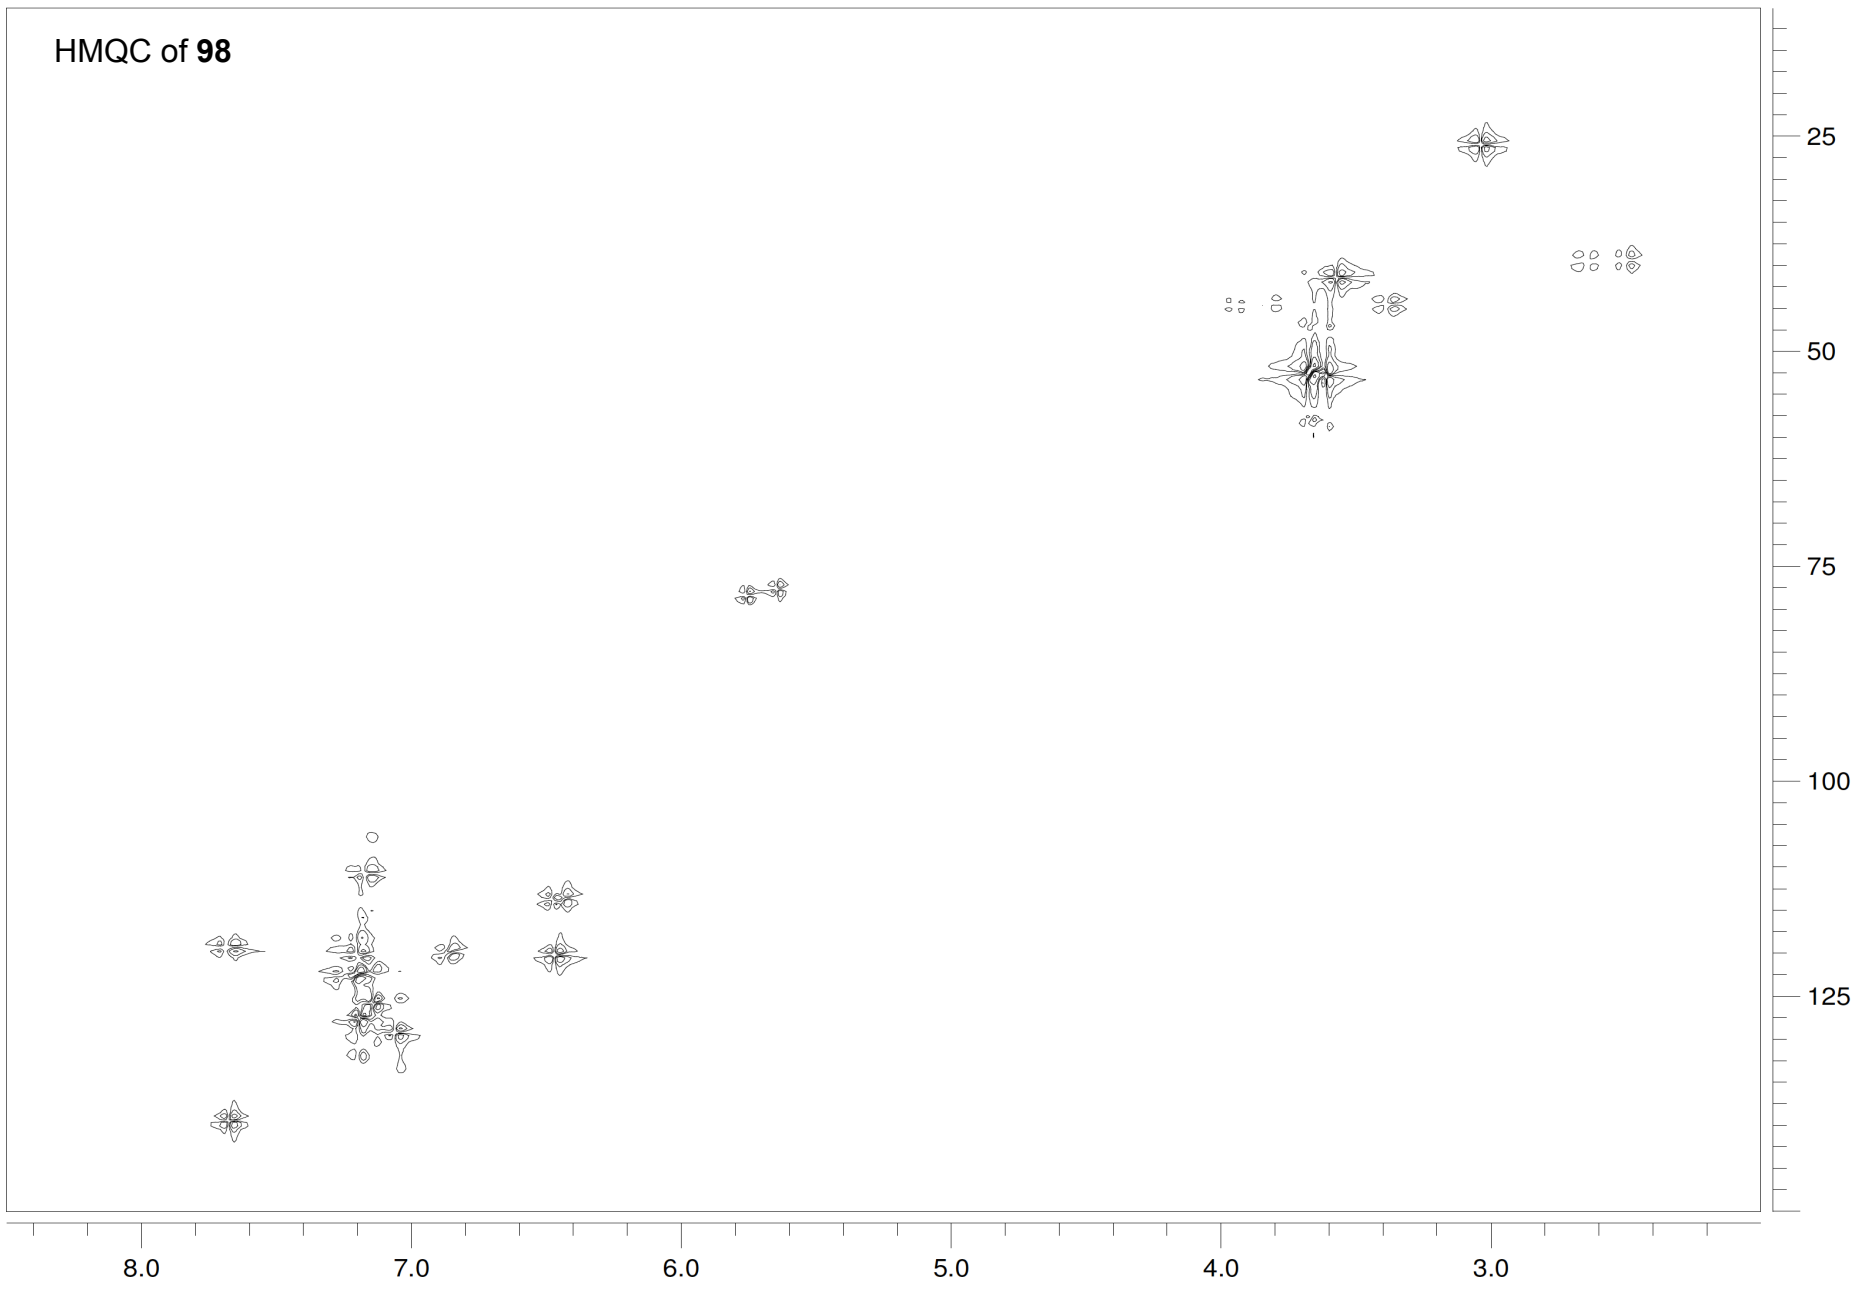

S-126



<sup>1</sup>H-NMR of **99**

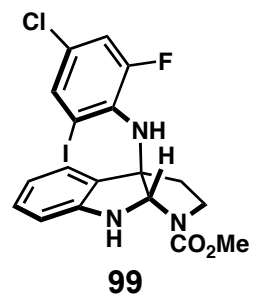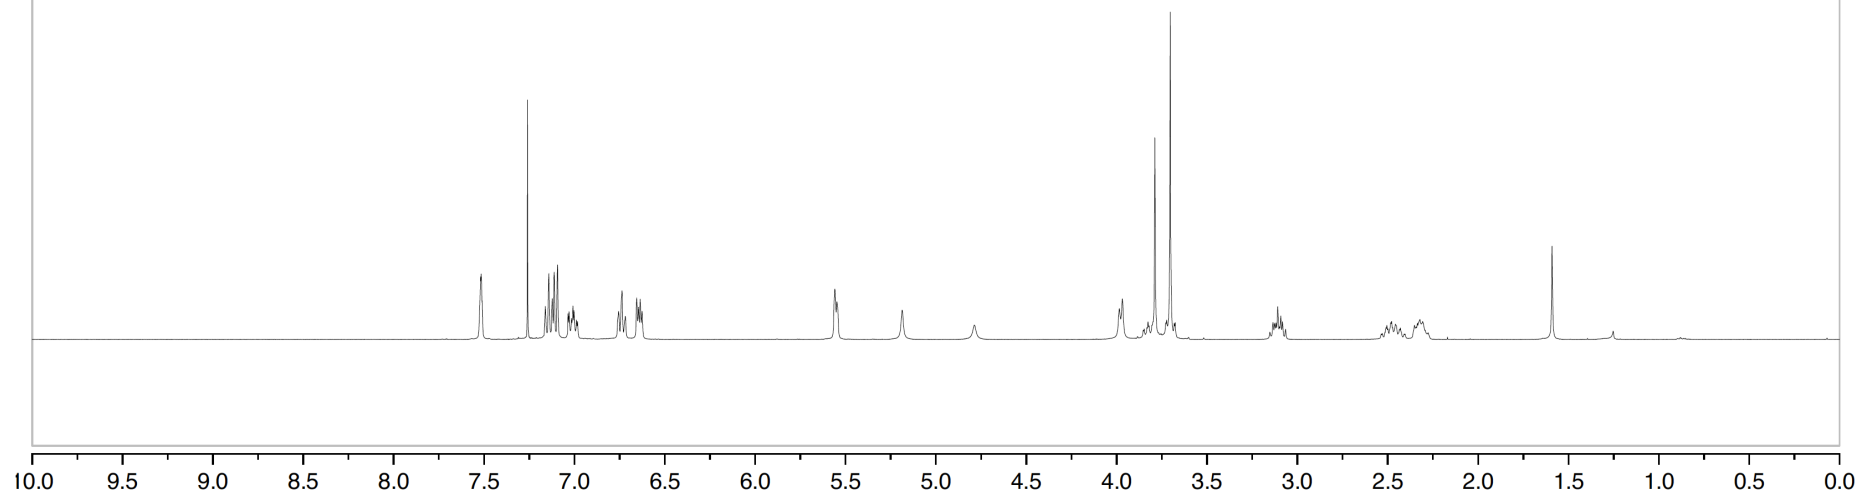

<sup>13</sup>C-NMR of **99**

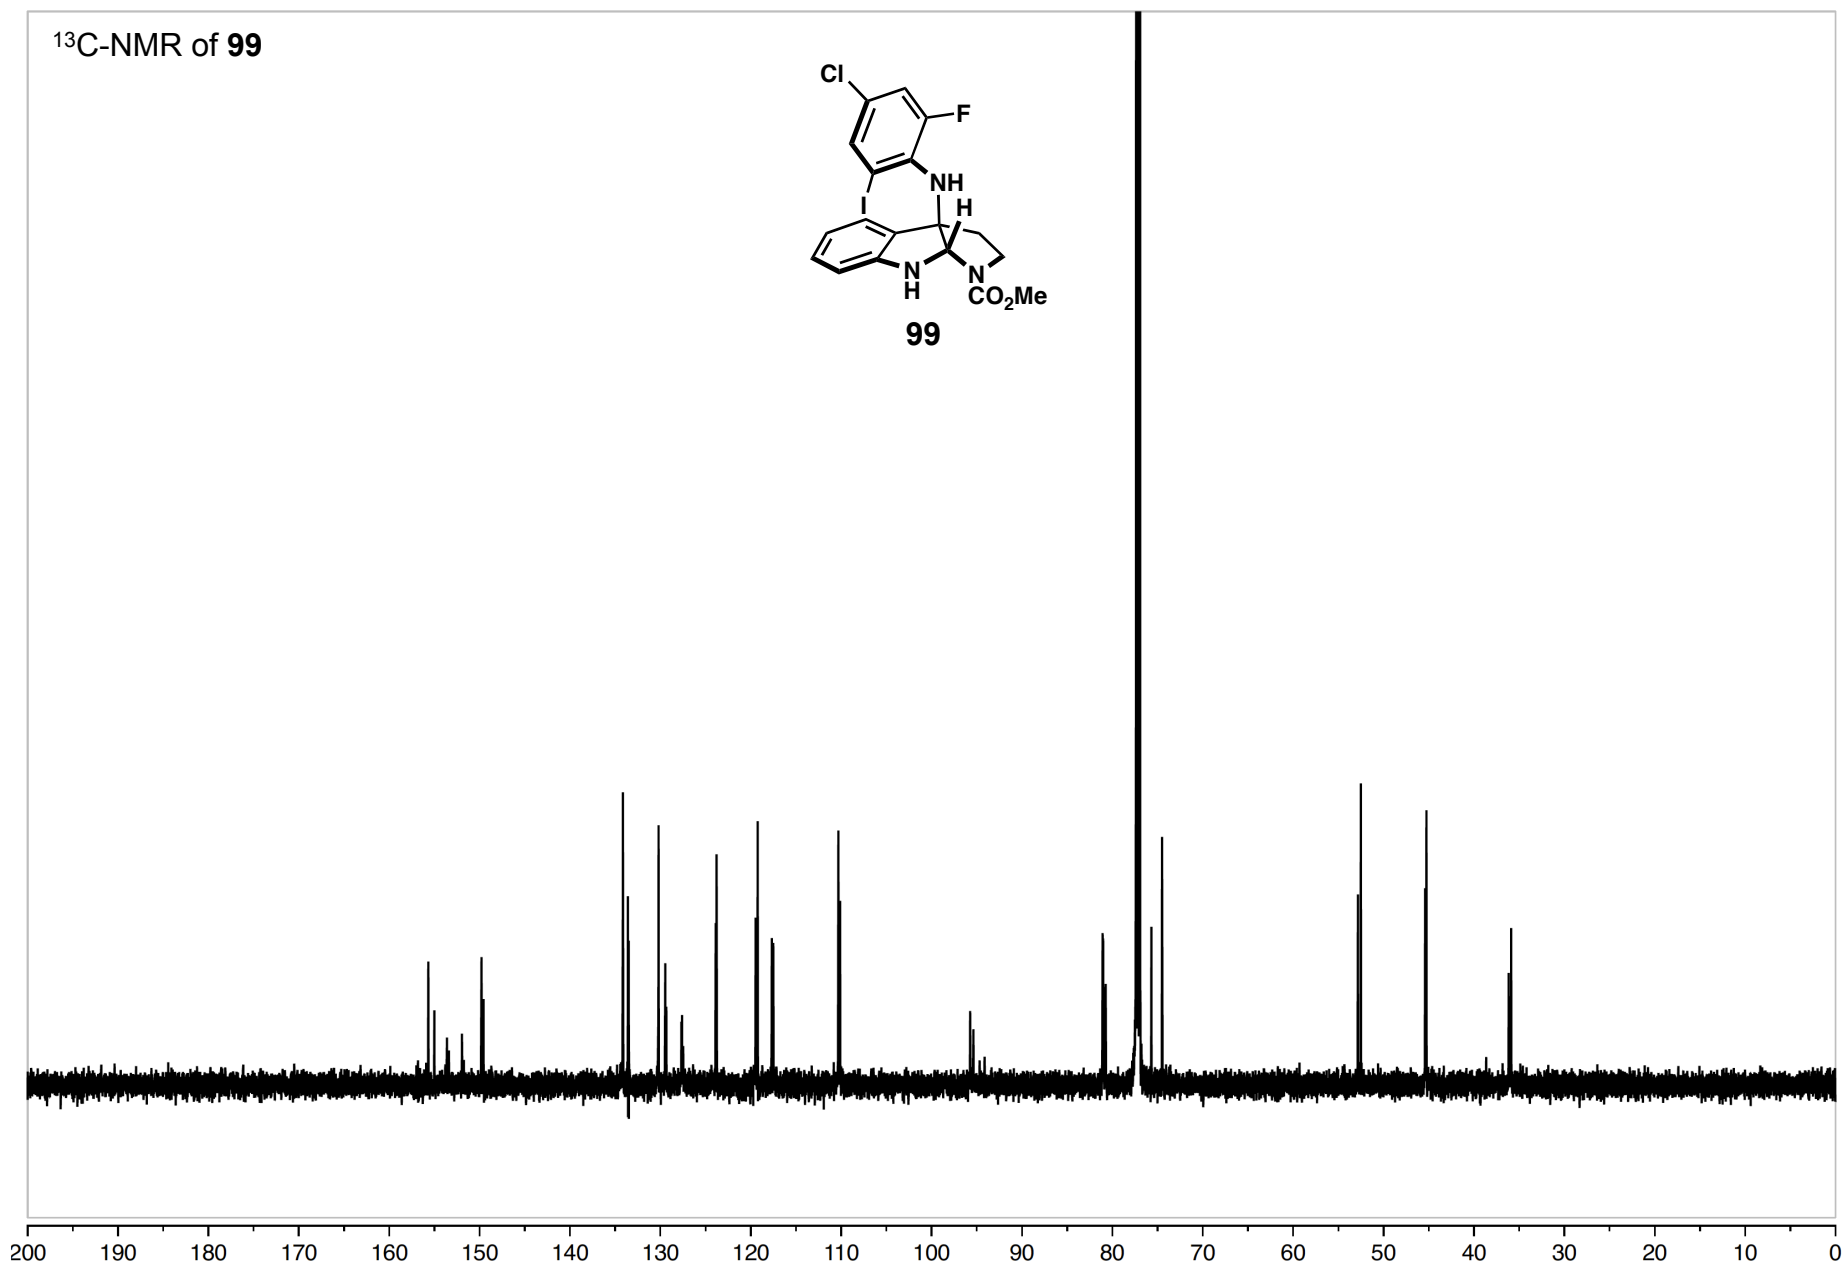

<sup>1</sup>H-NMR of **SI-2**

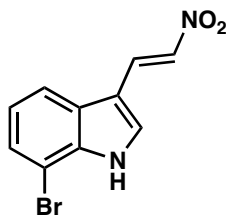

**SI-2**

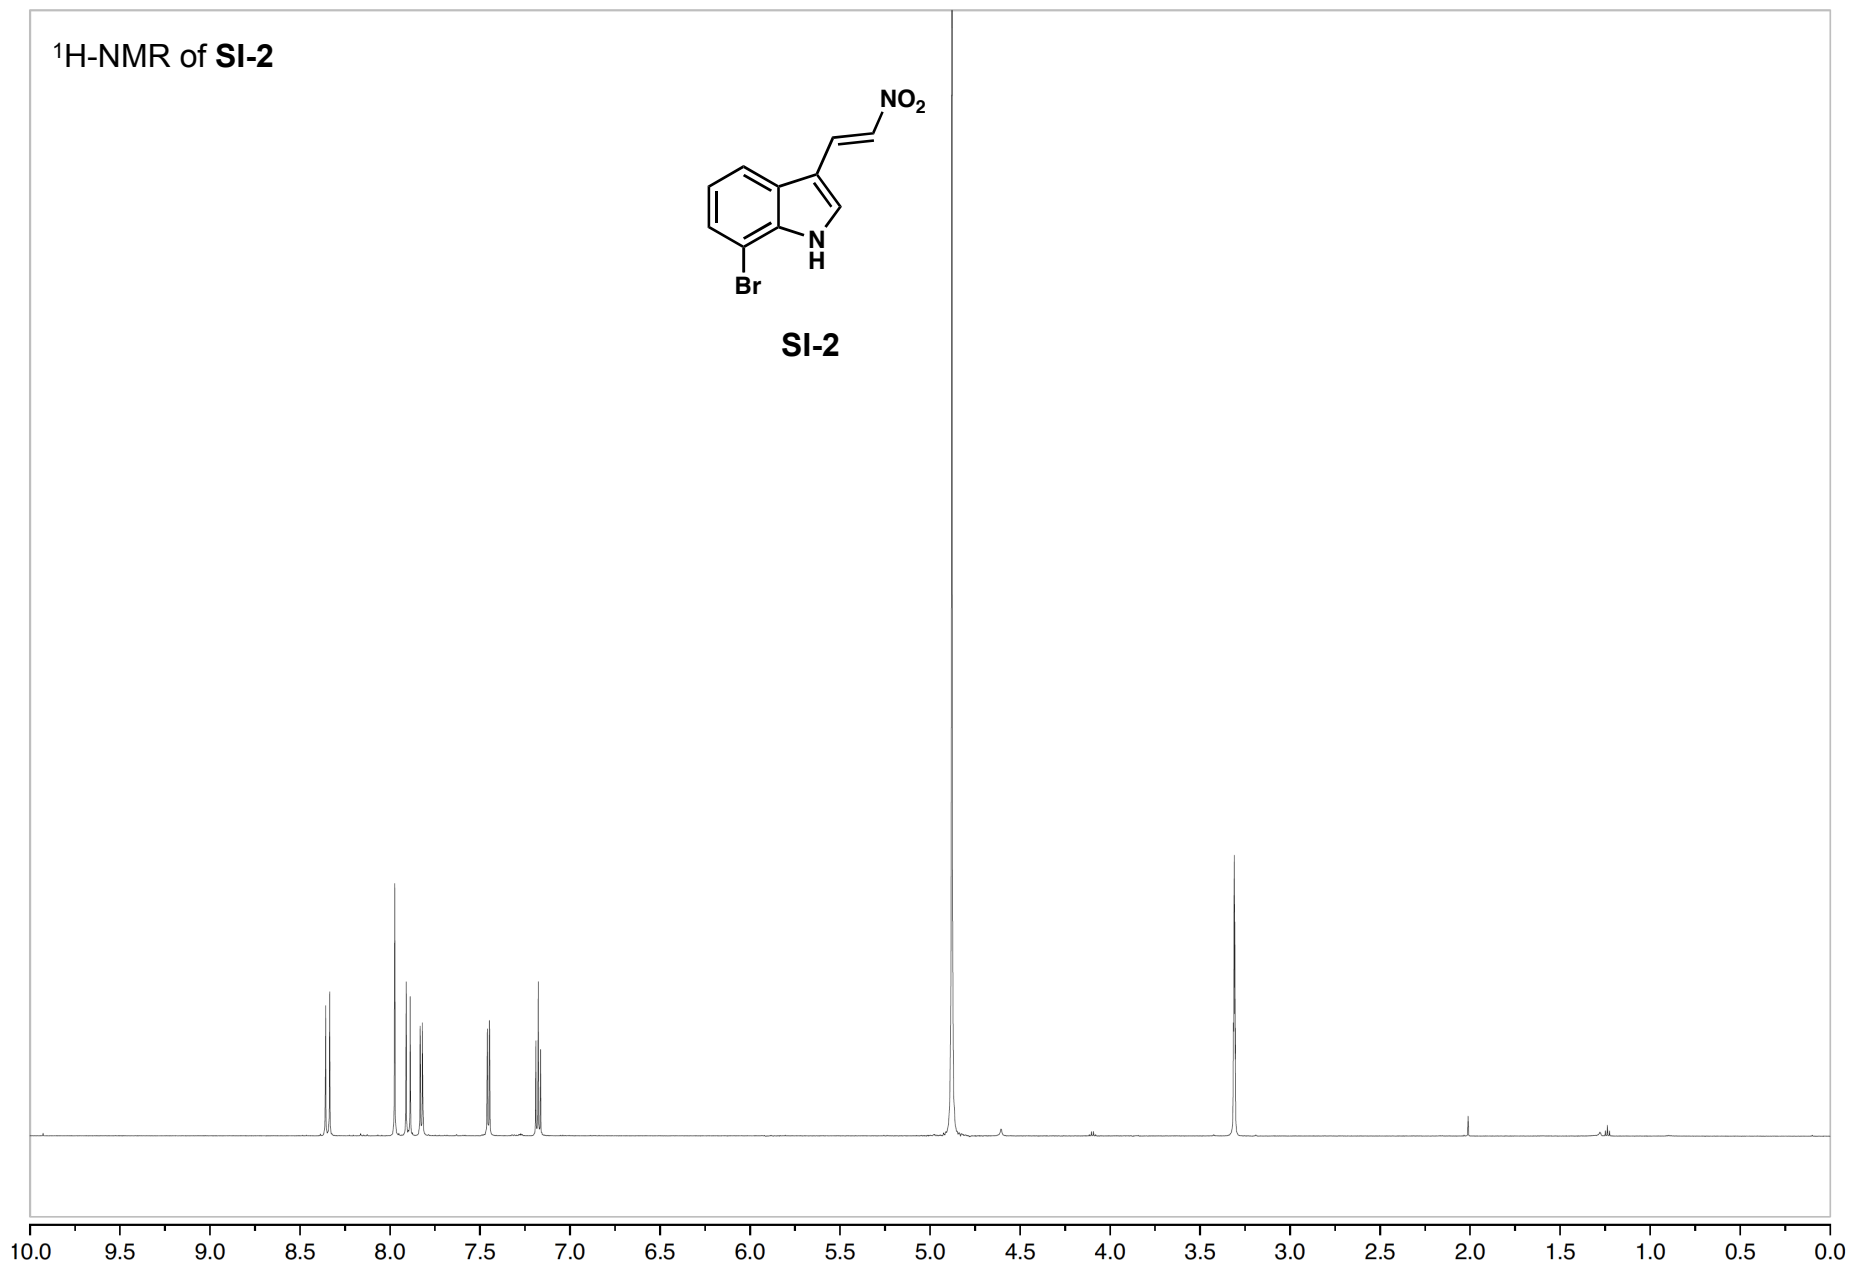

<sup>13</sup>C-NMR of **SI-2**

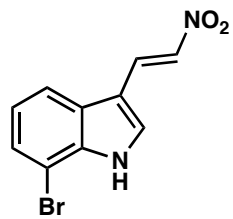

**SI-2**

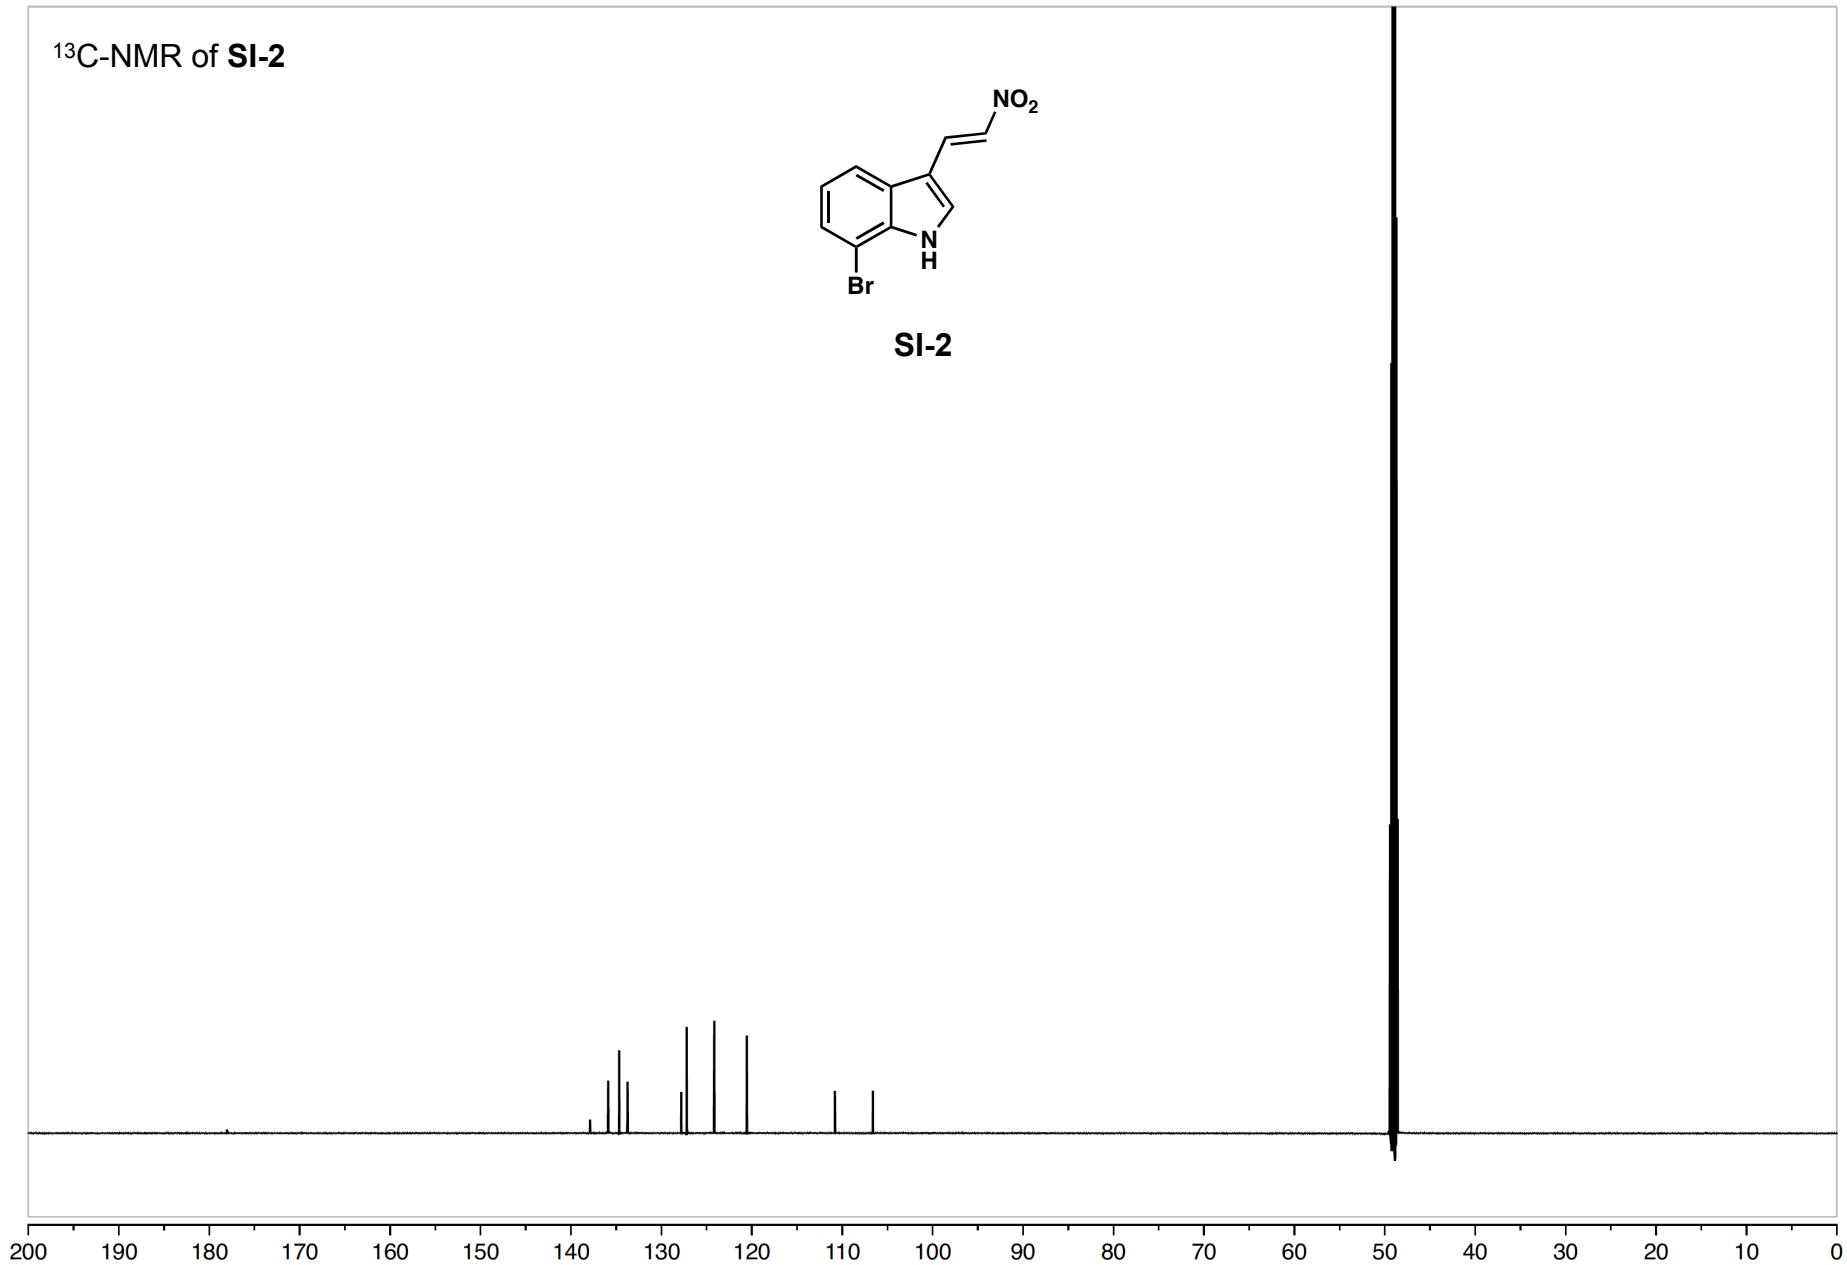

<sup>1</sup>H-NMR of **102a**

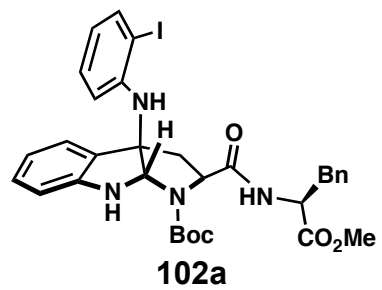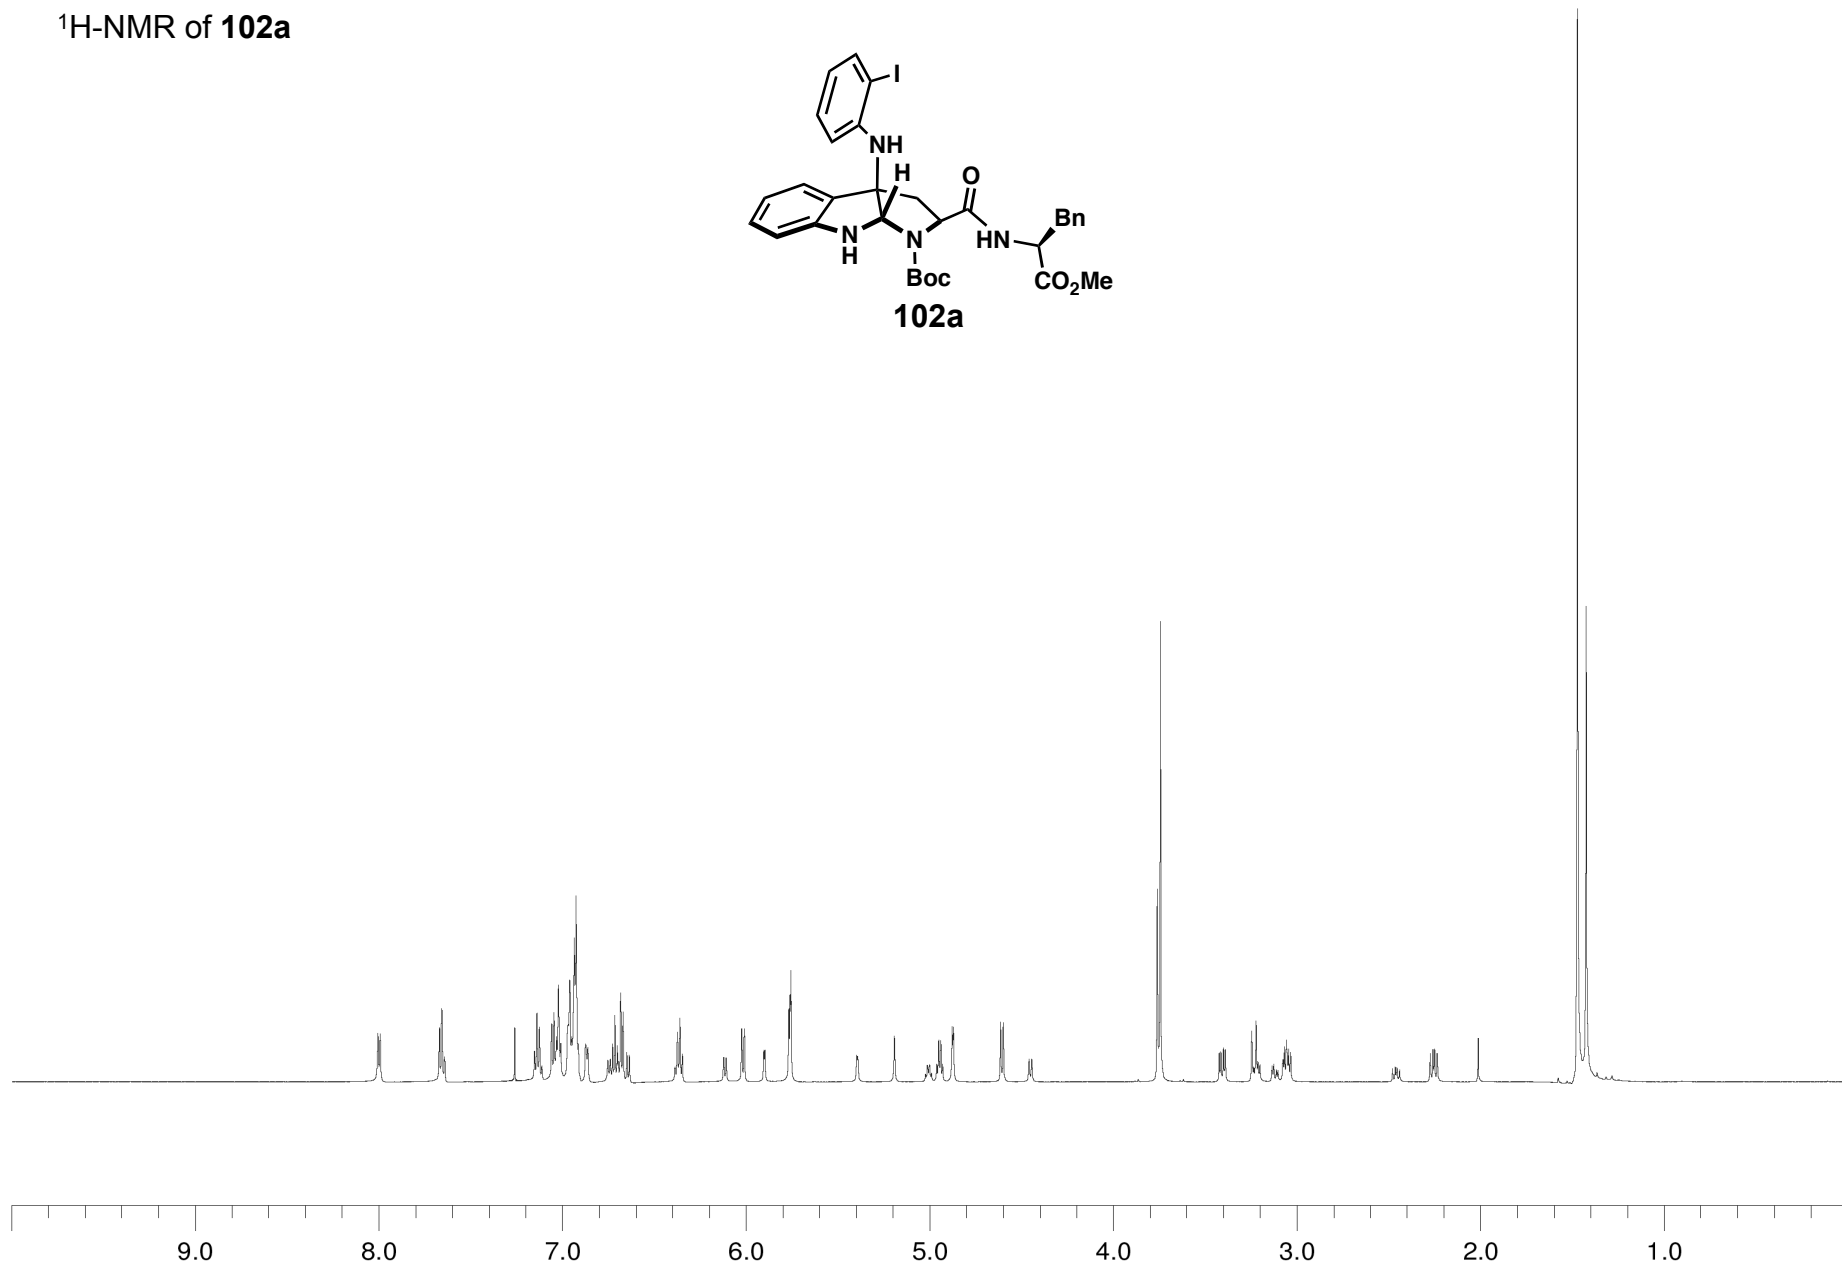

<sup>13</sup>C-NMR of **102a**

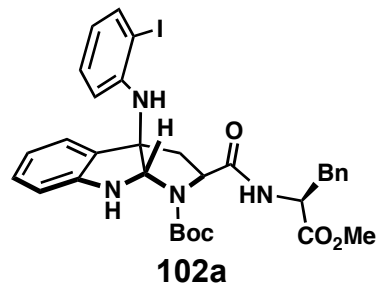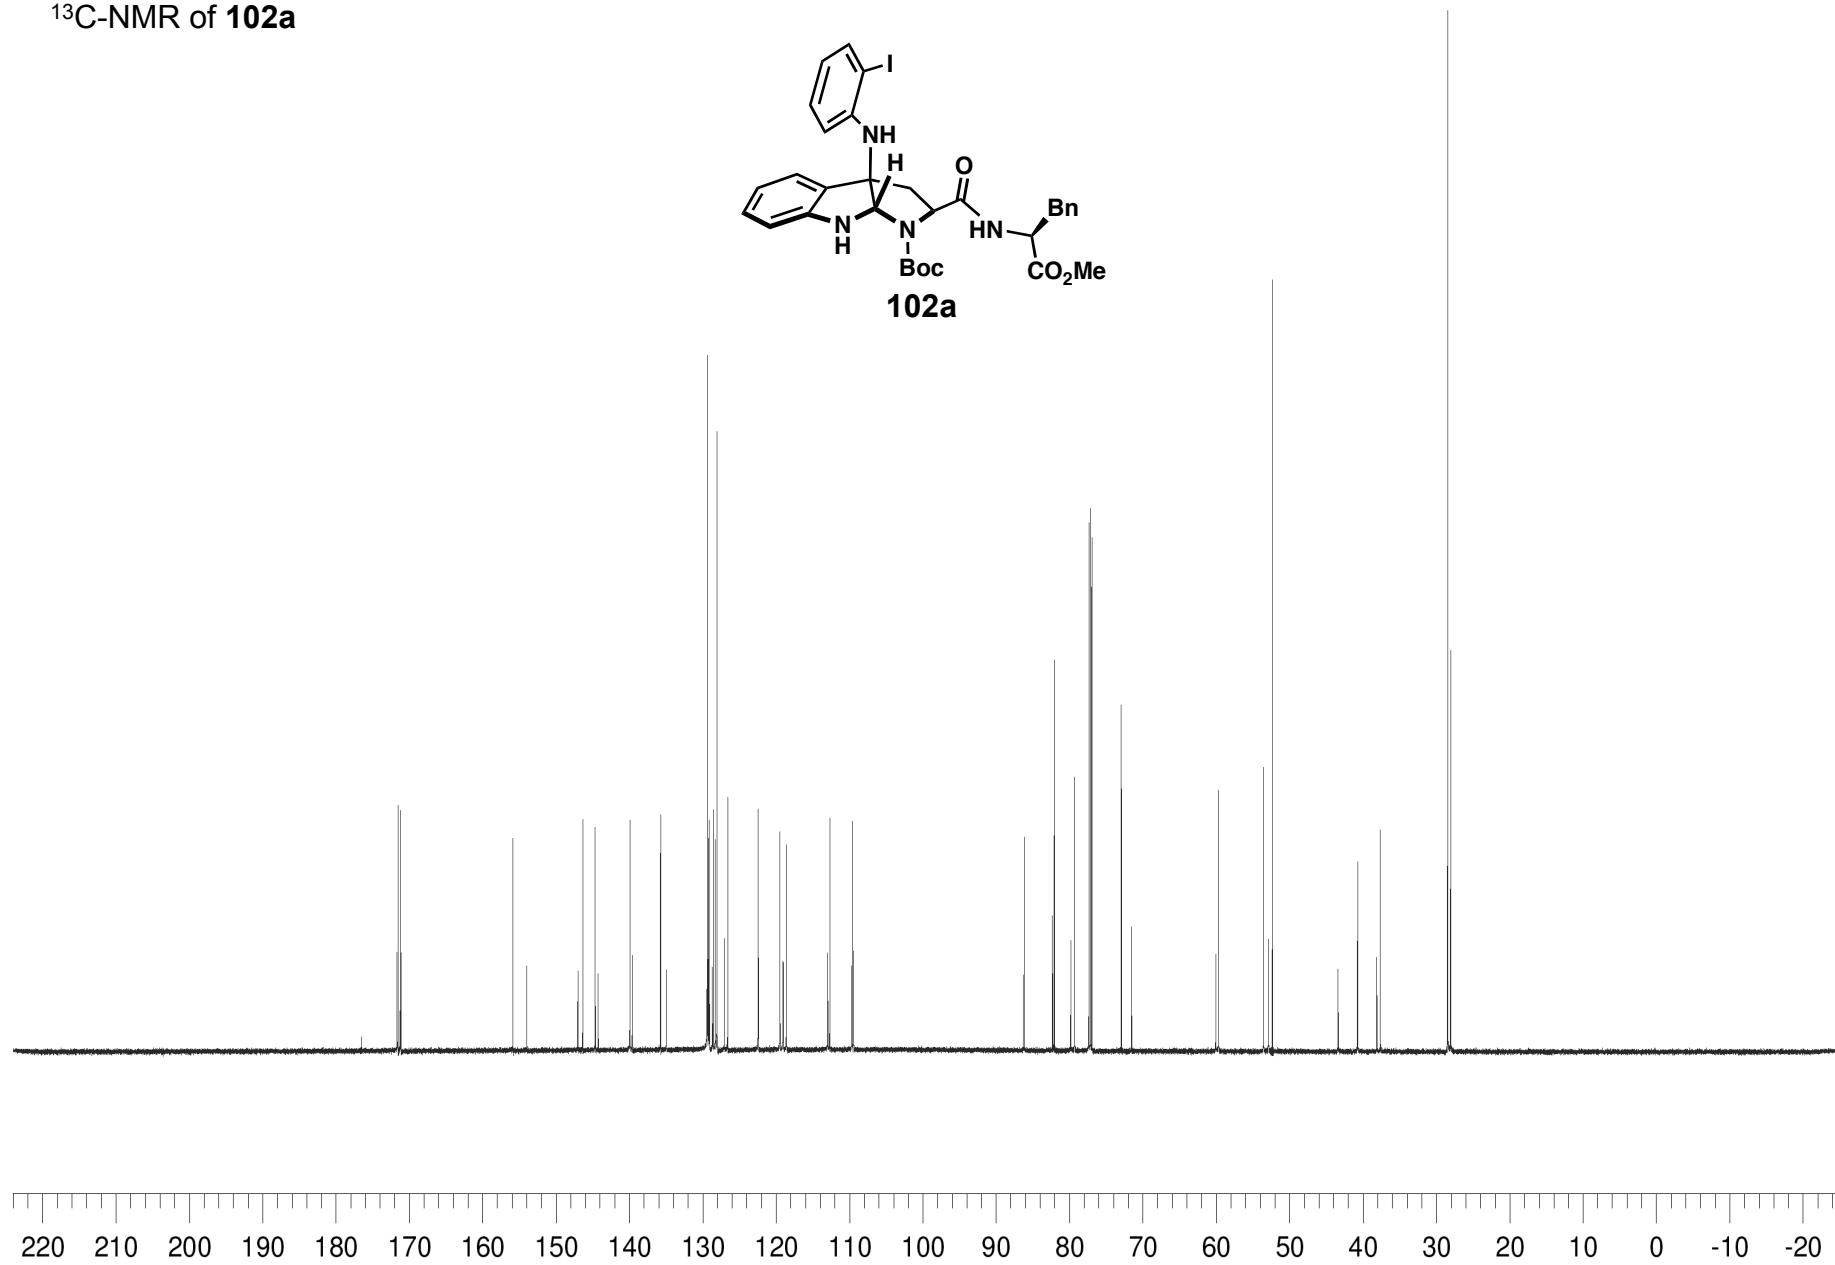

<sup>1</sup>H-NMR of **102c**

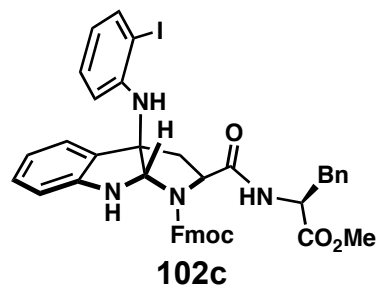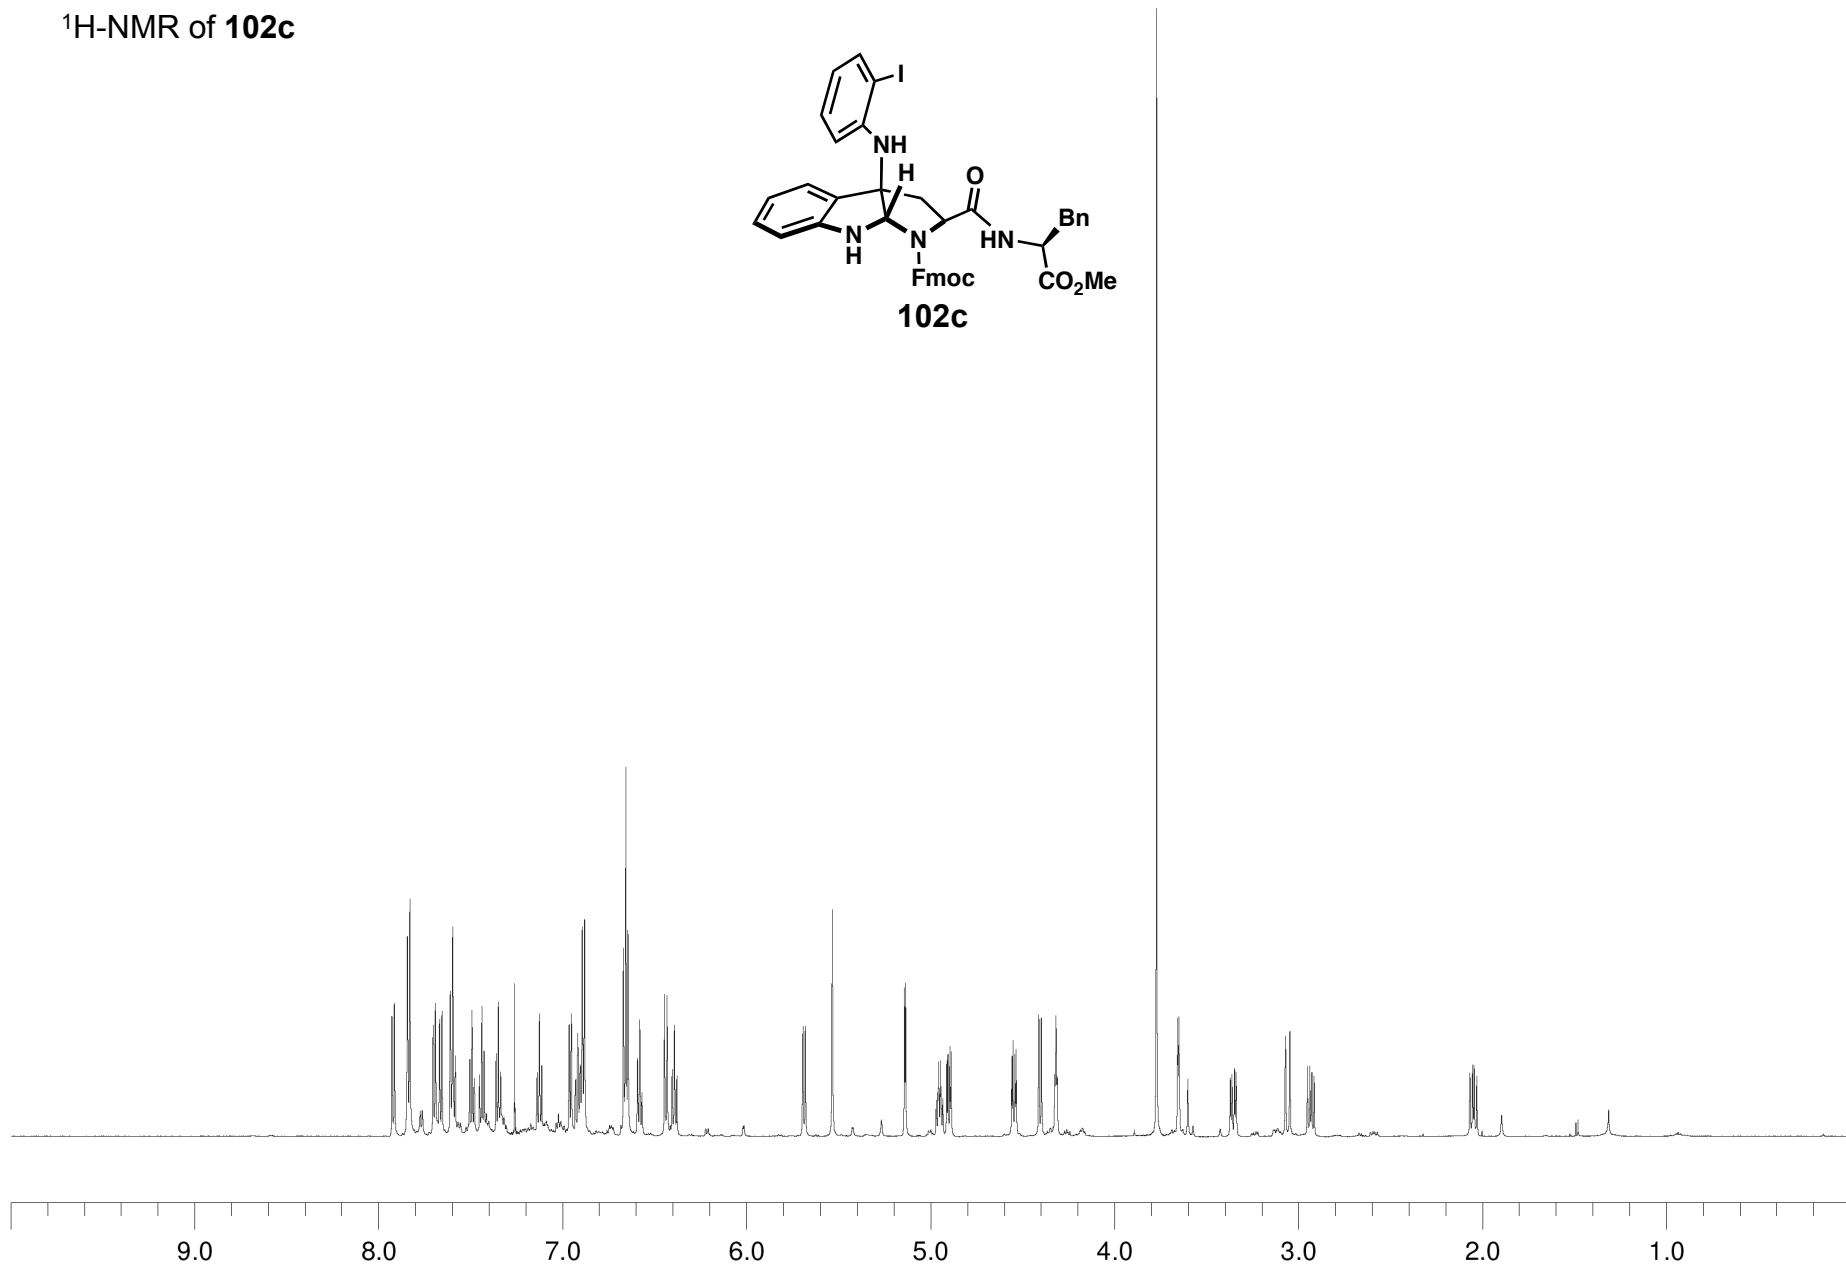

<sup>13</sup>C-NMR of **102c**

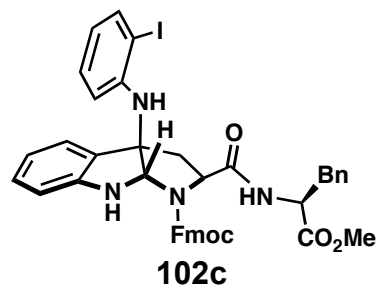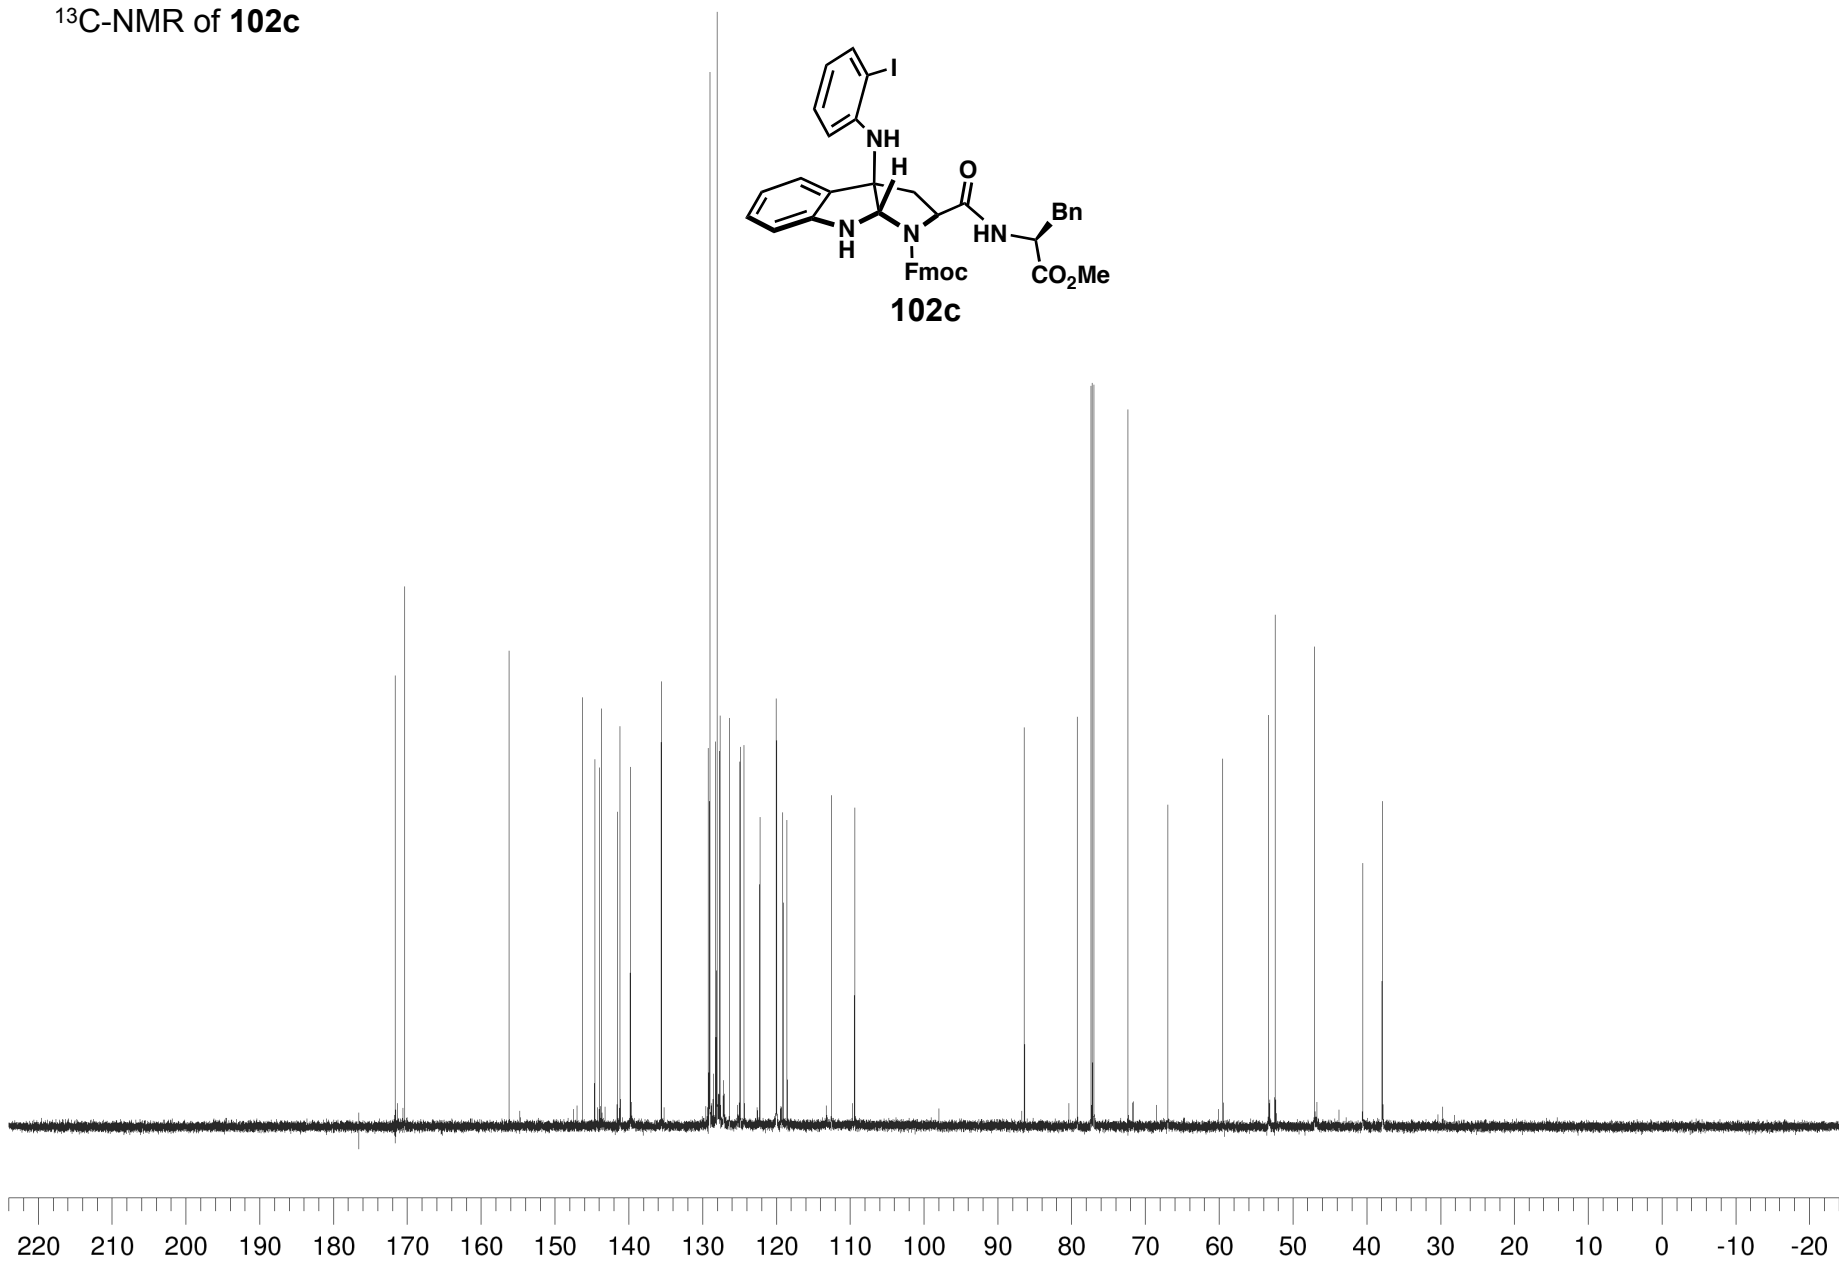



<sup>1</sup>H-NMR of **104**

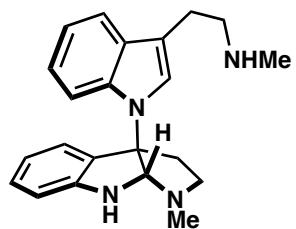

**104**

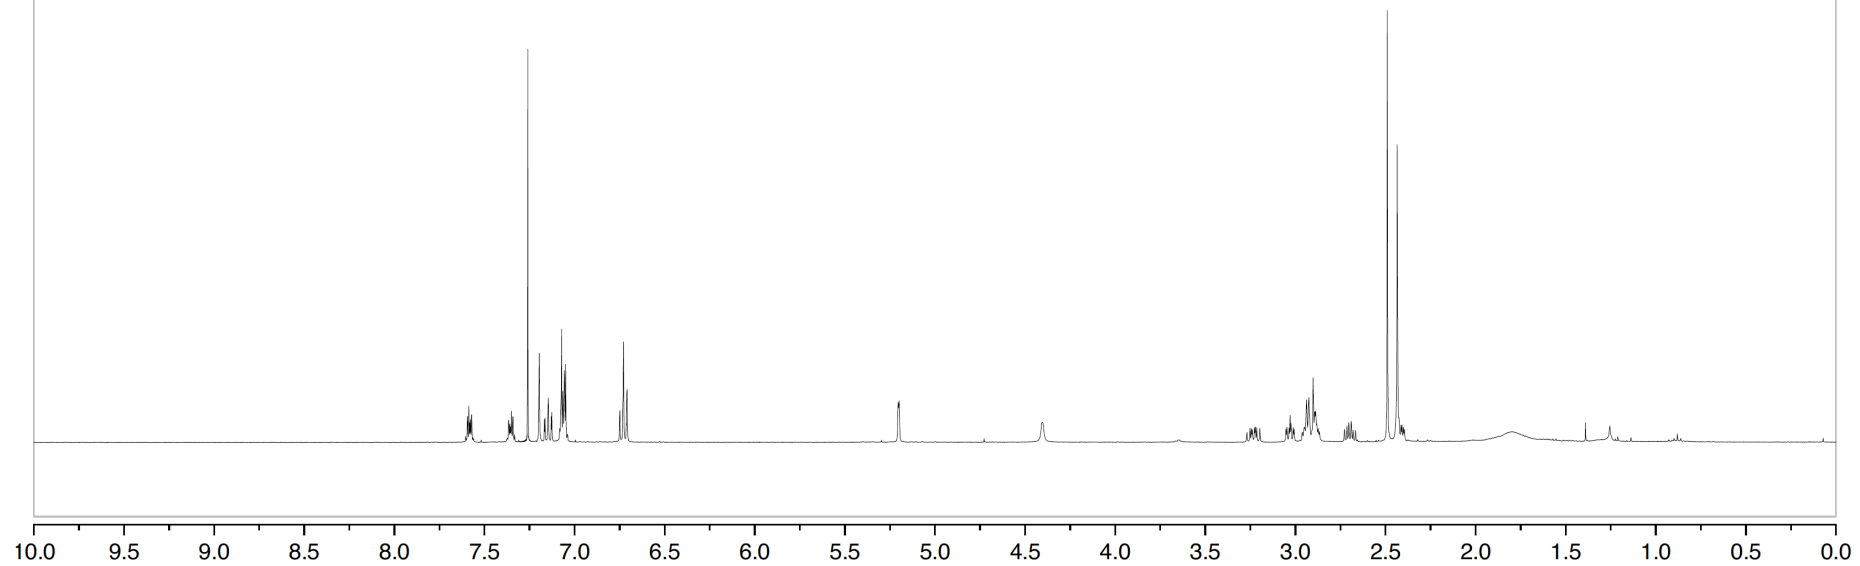

<sup>13</sup>C-NMR of **104**

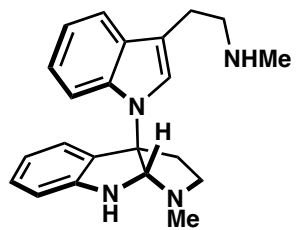

**104**

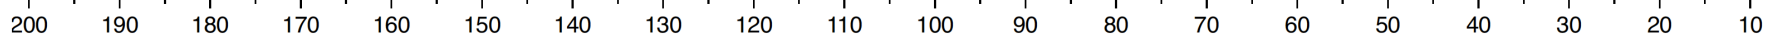

HMQC of **104**

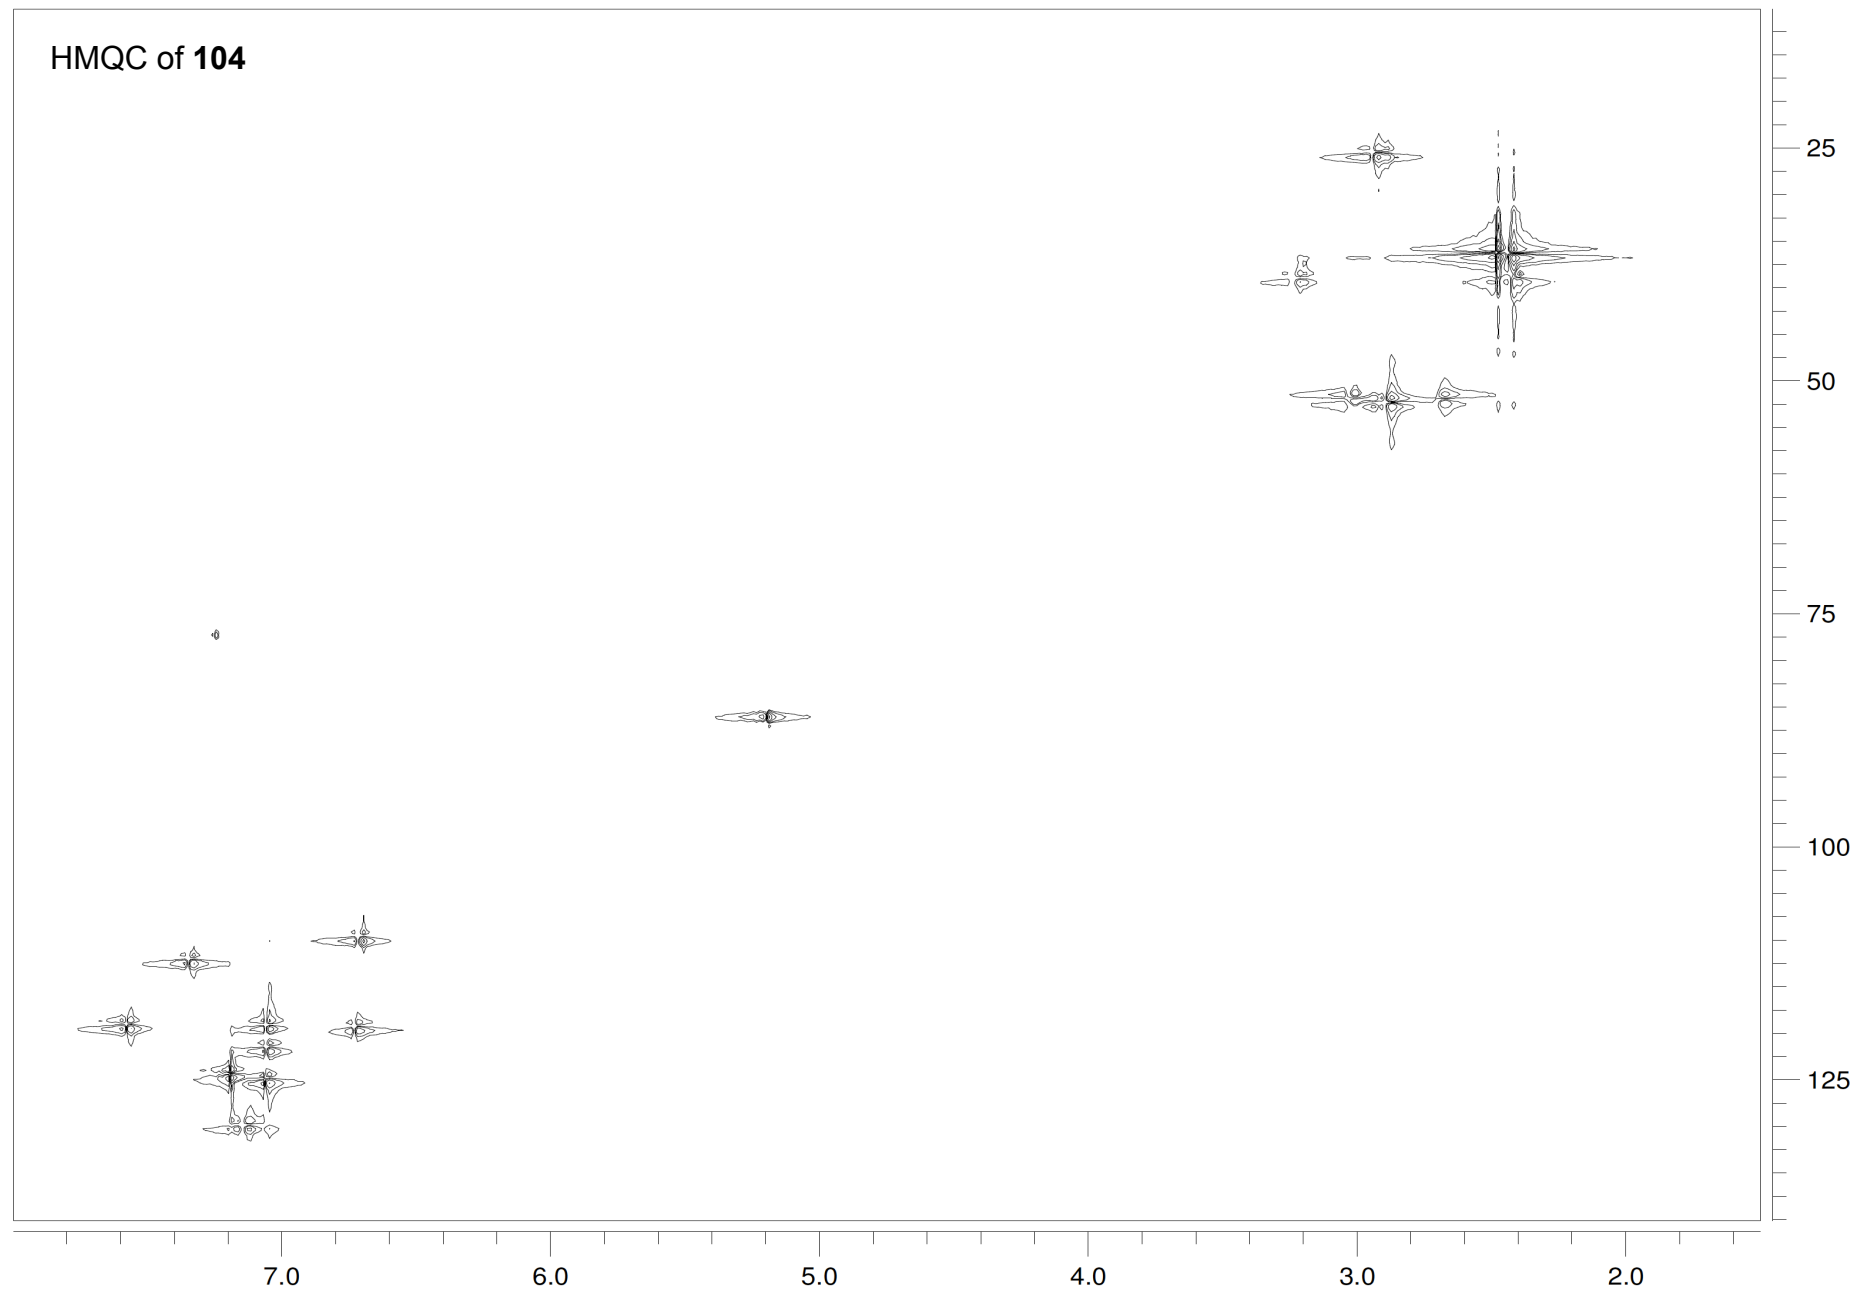

S-137

<sup>1</sup>H-NMR of **106**

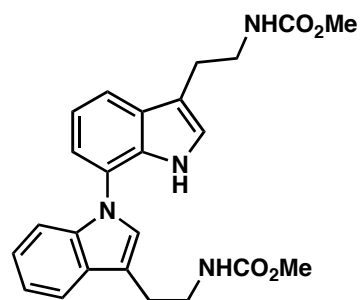

**106**

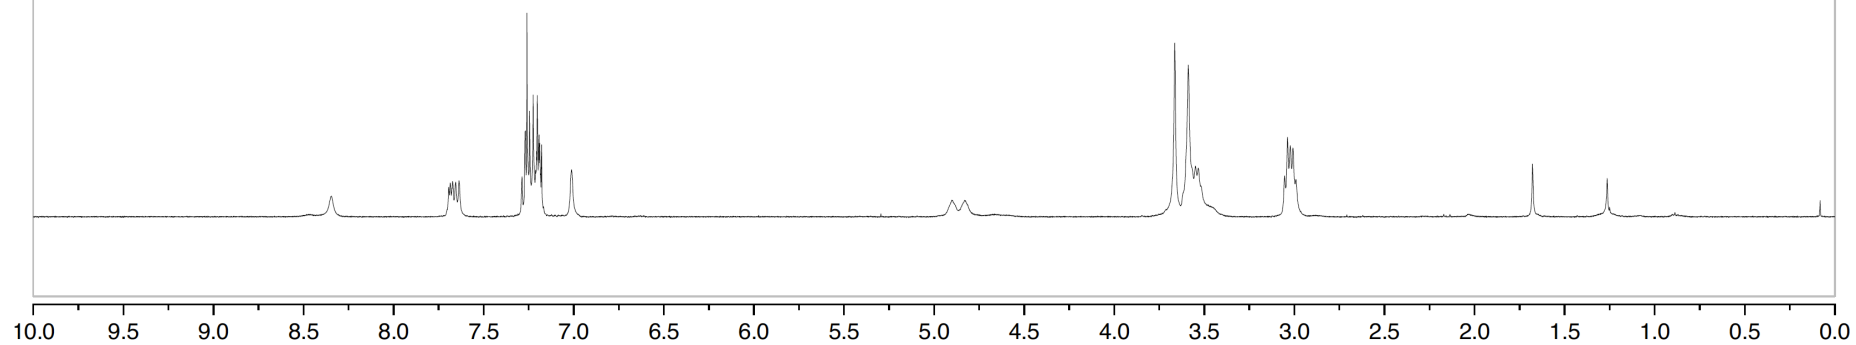

<sup>13</sup>C-NMR of **106**

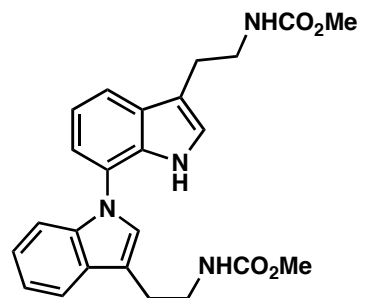

**106**

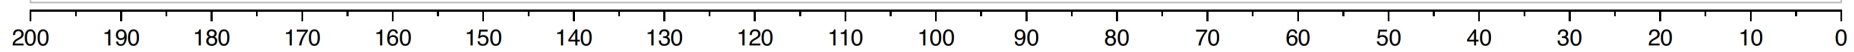

<sup>1</sup>H-NMR of **119** (CDCl<sub>3</sub>)

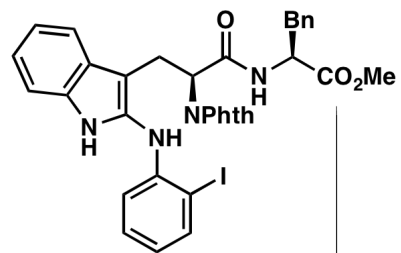

**119**

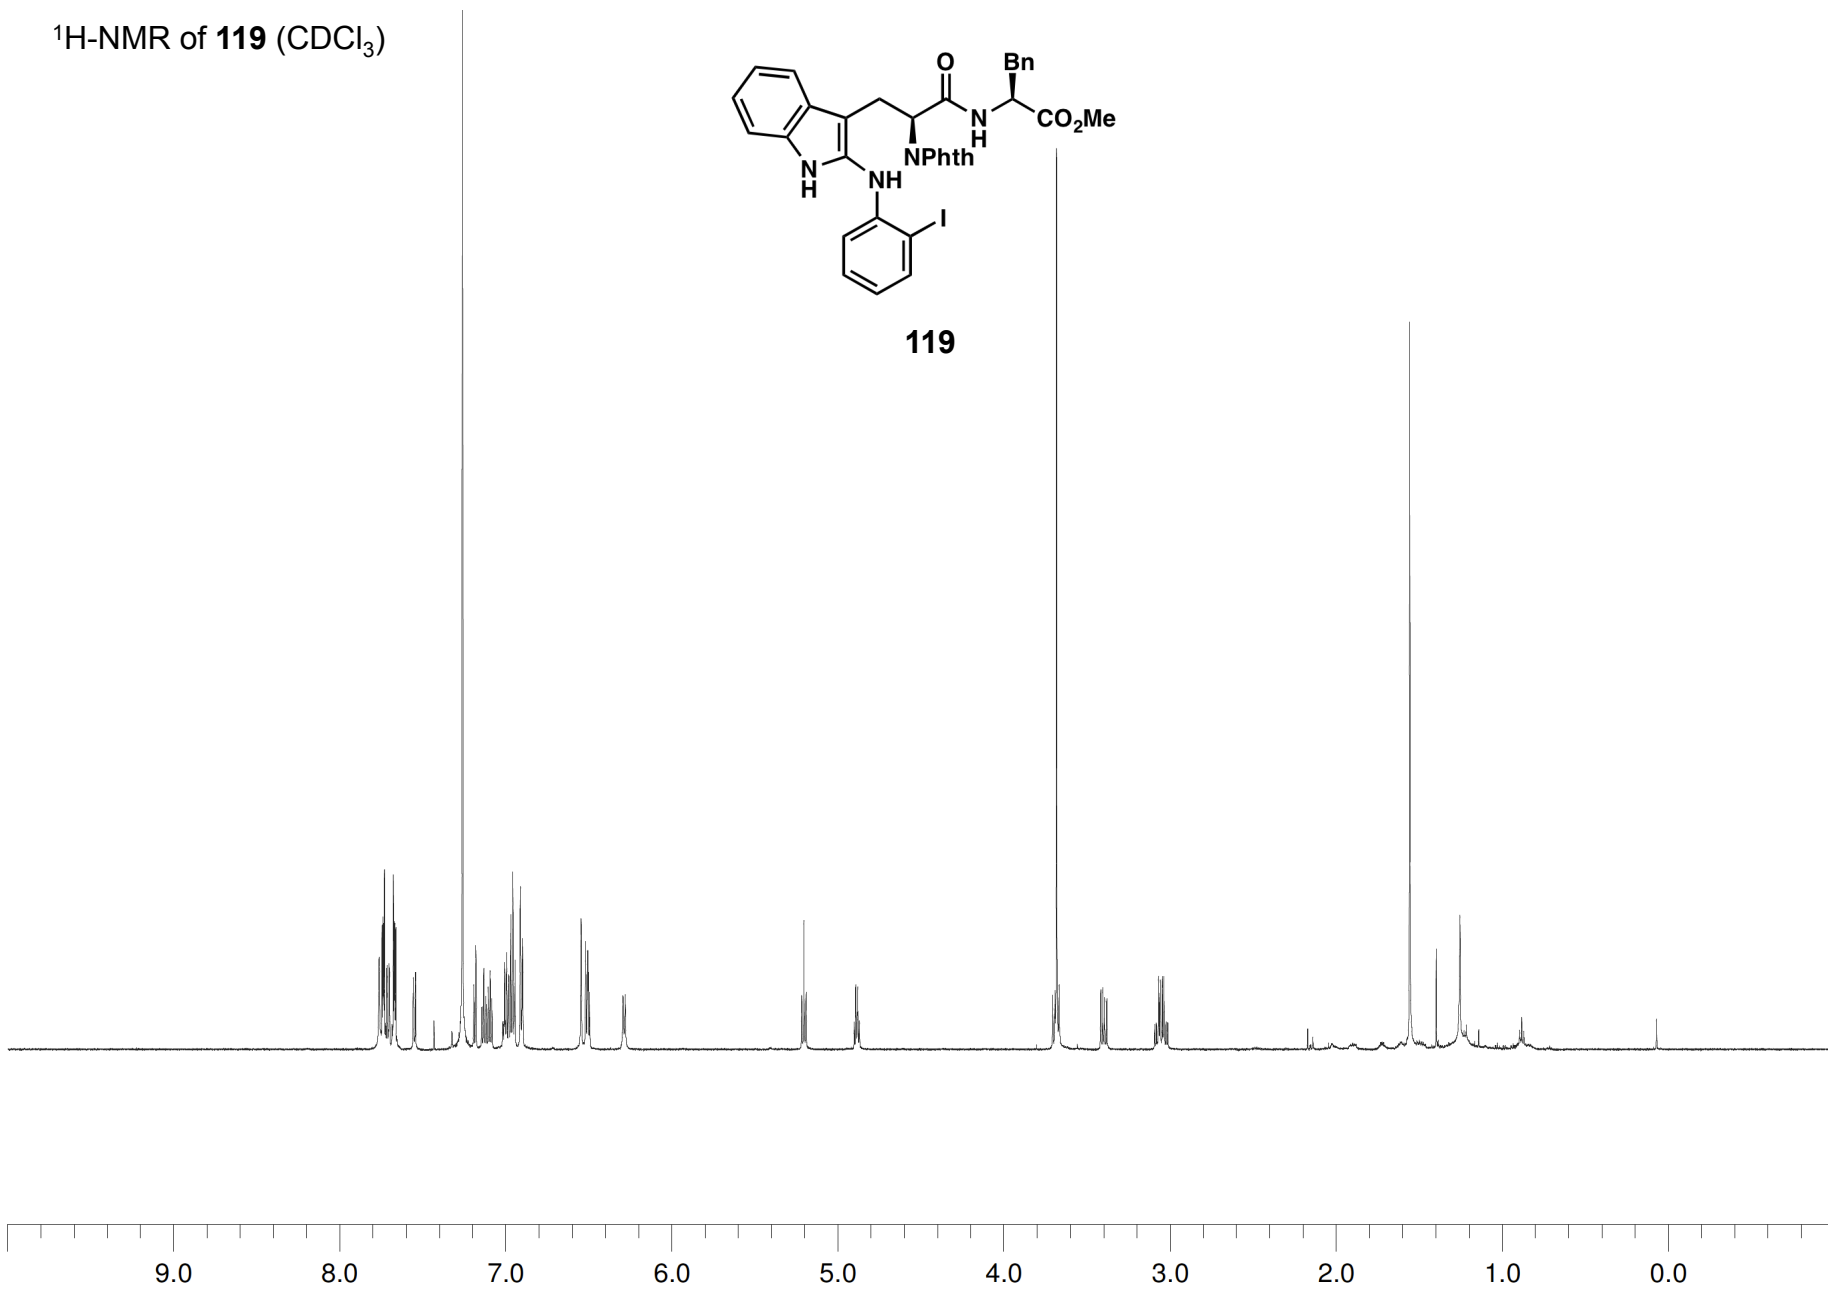

$^{13}\text{C}$ -NMR of **119** ( $\text{CDCl}_3$ )

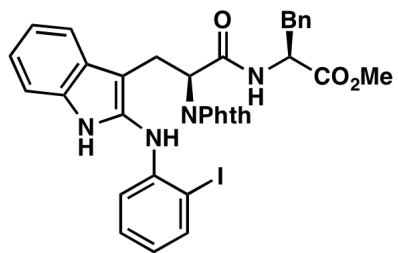

**119**

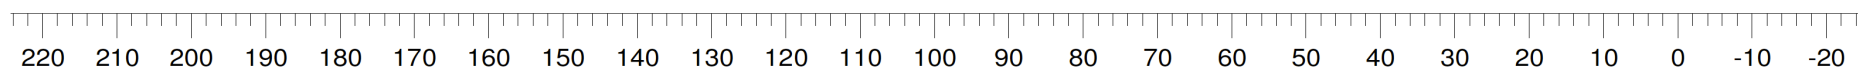

APT of **119** (CDCl<sub>3</sub>)

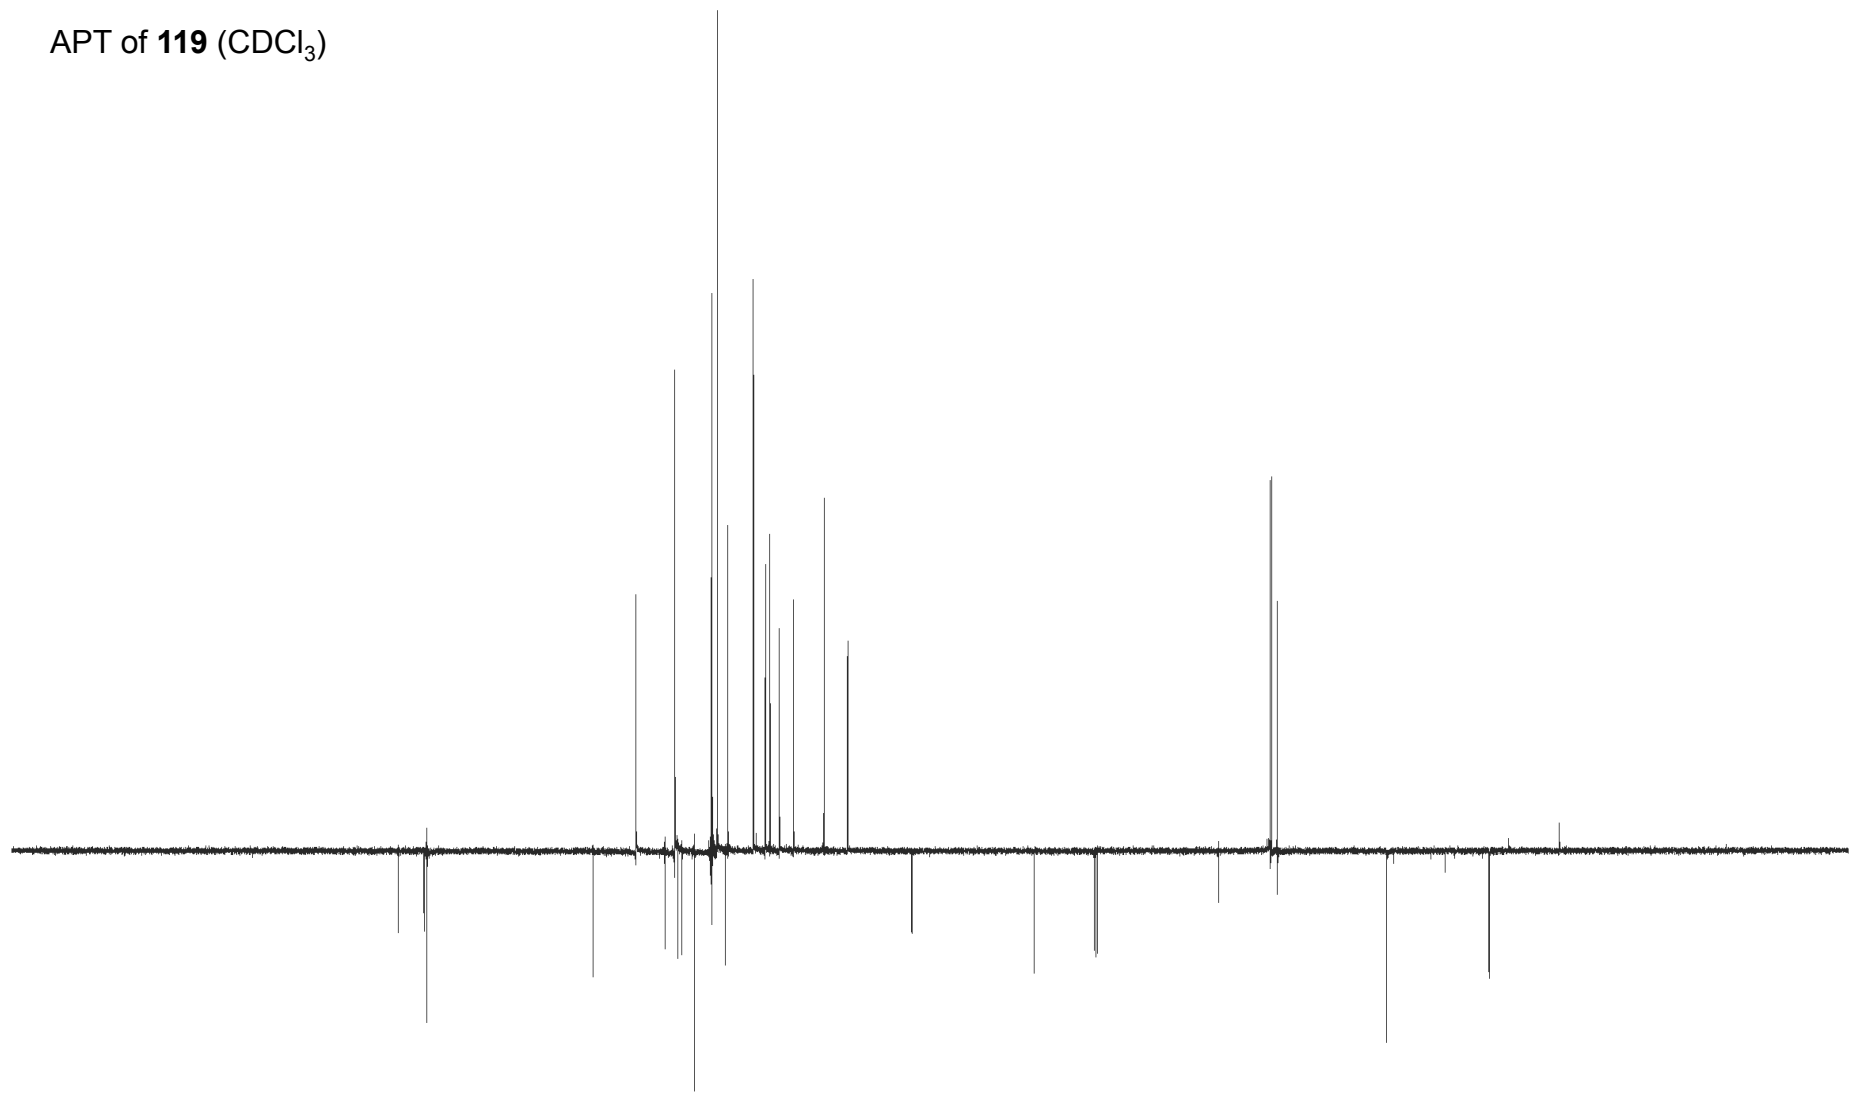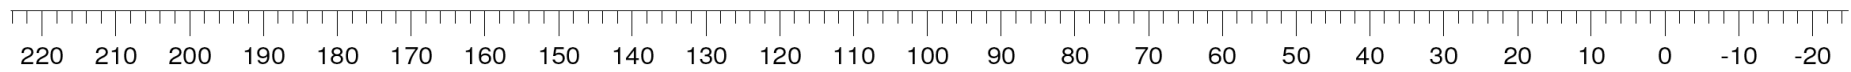

S-142



$^1\text{H-NMR}$  of **119** ( $\text{CD}_2\text{Cl}_2$ )

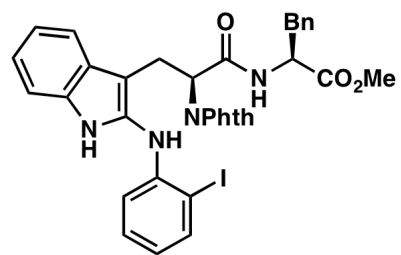

**119**

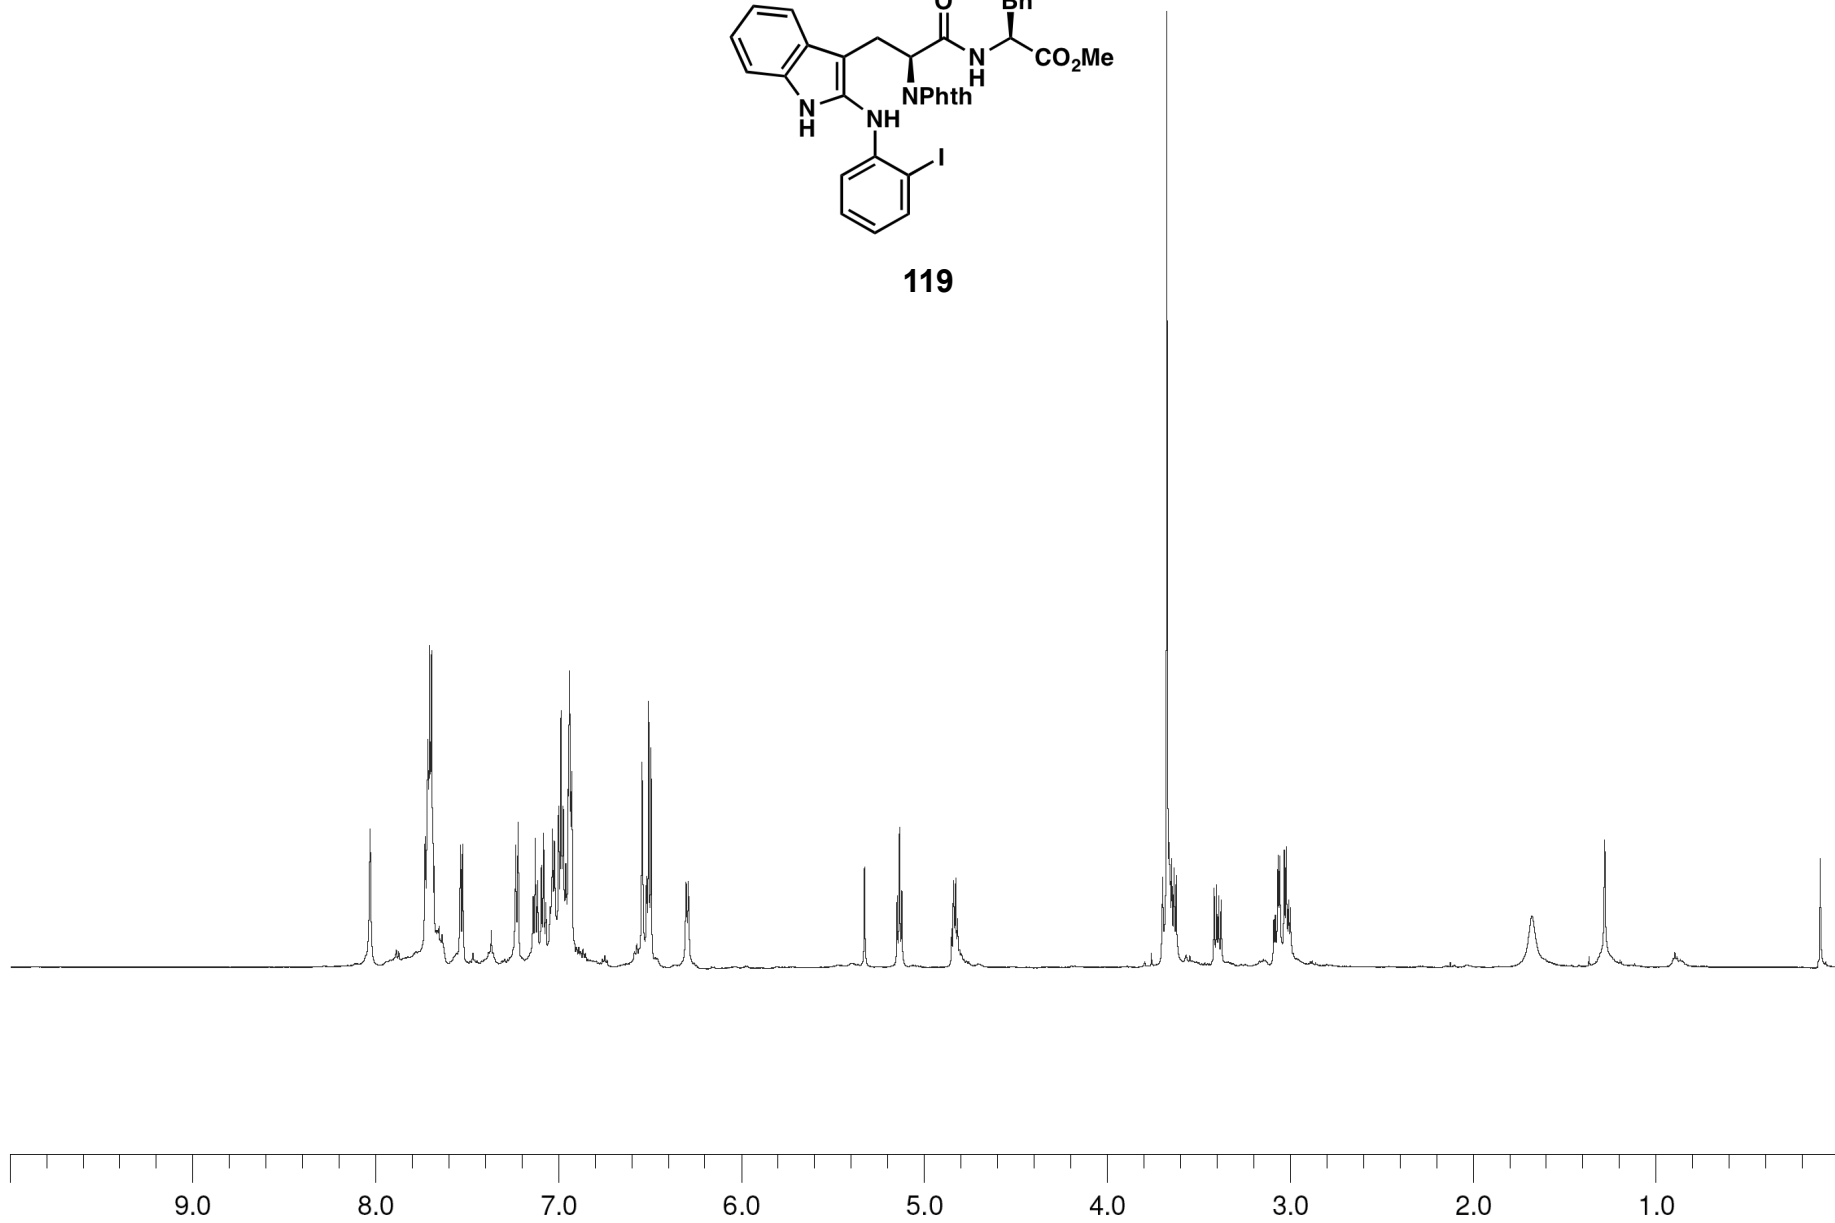

$^{13}\text{C}$ -NMR of **119** ( $\text{CD}_2\text{Cl}_2$ )

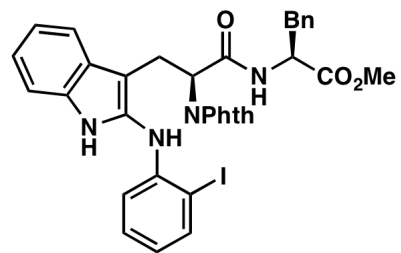

**119**

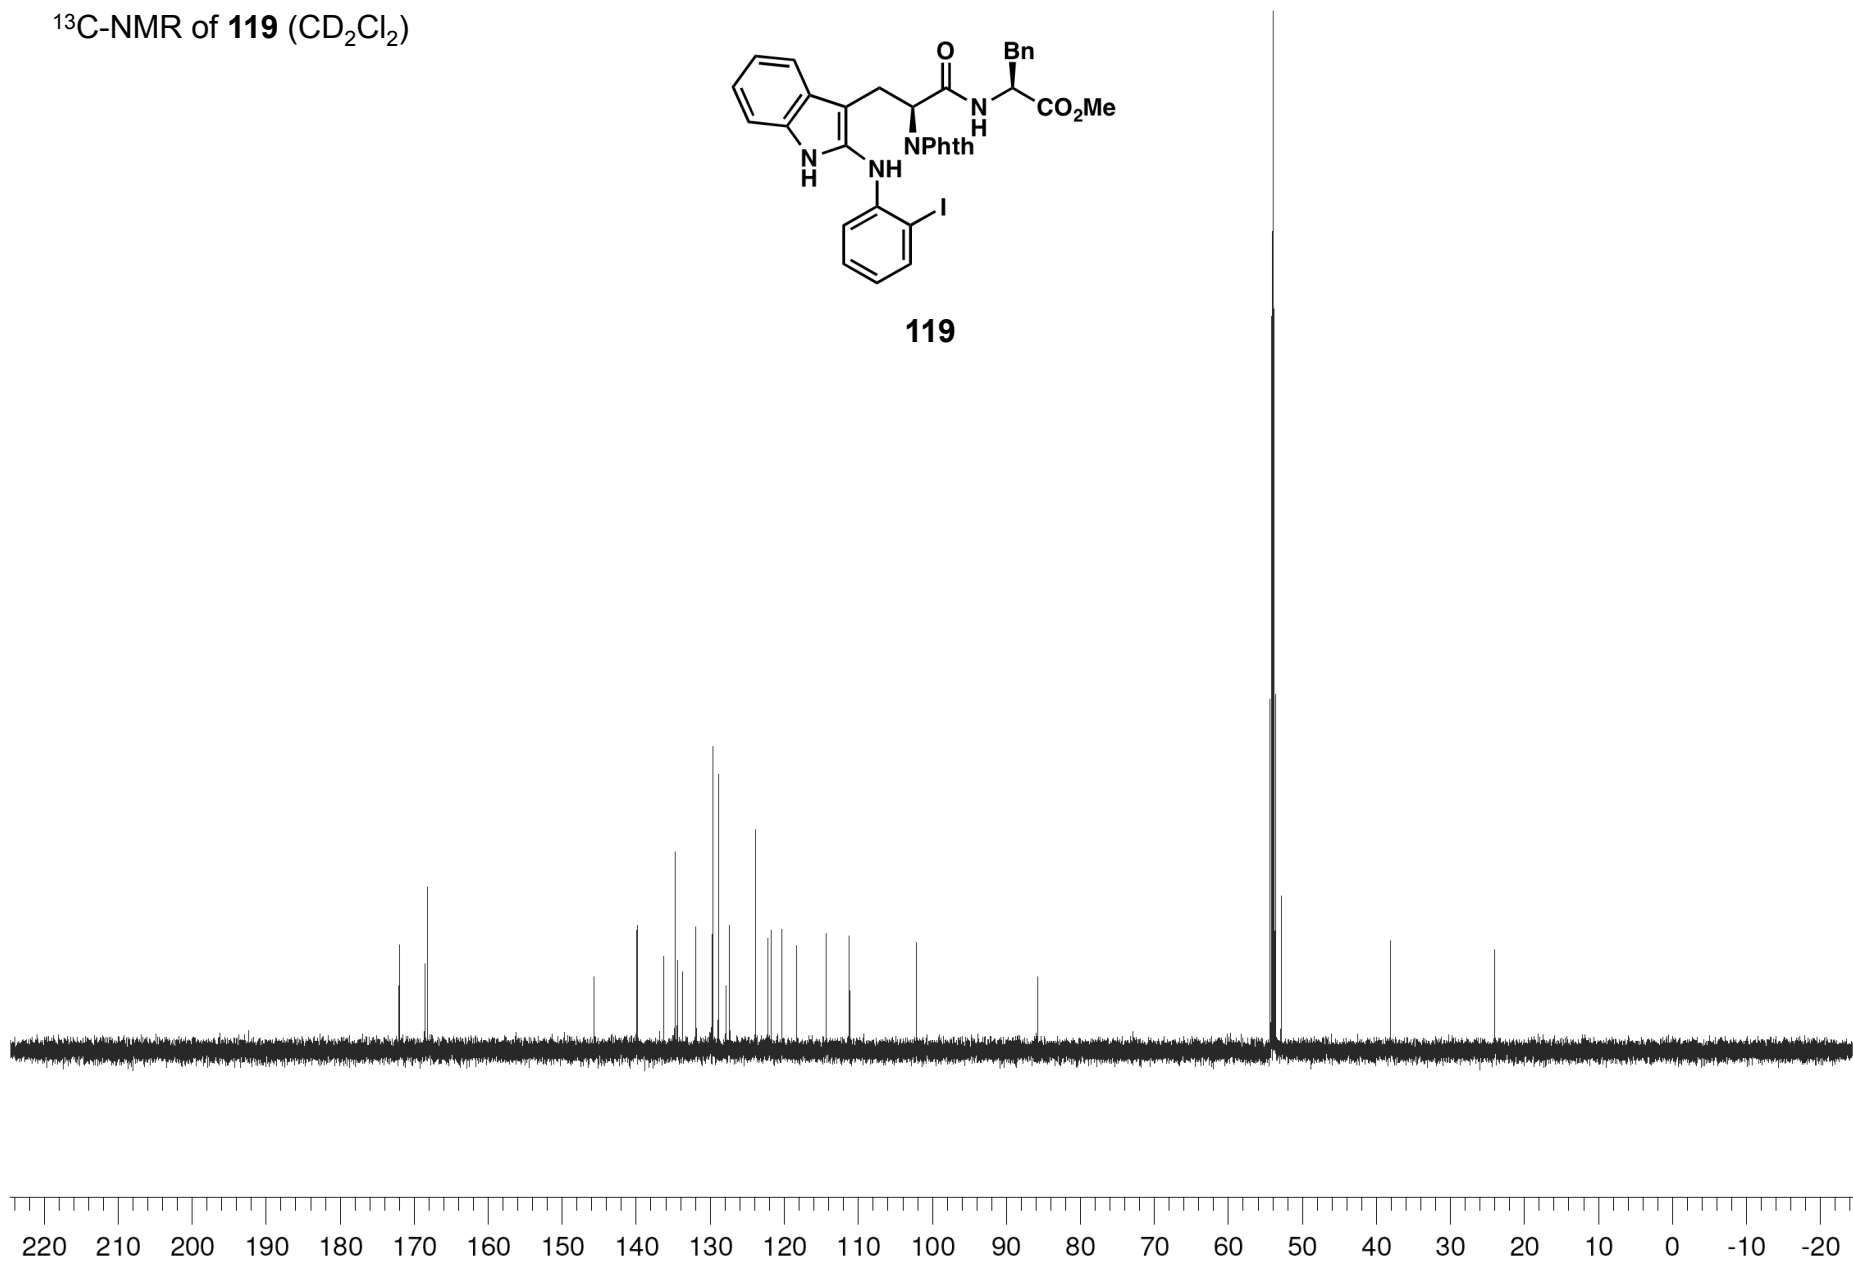

HMBC of 119 (CD<sub>2</sub>Cl<sub>2</sub>)

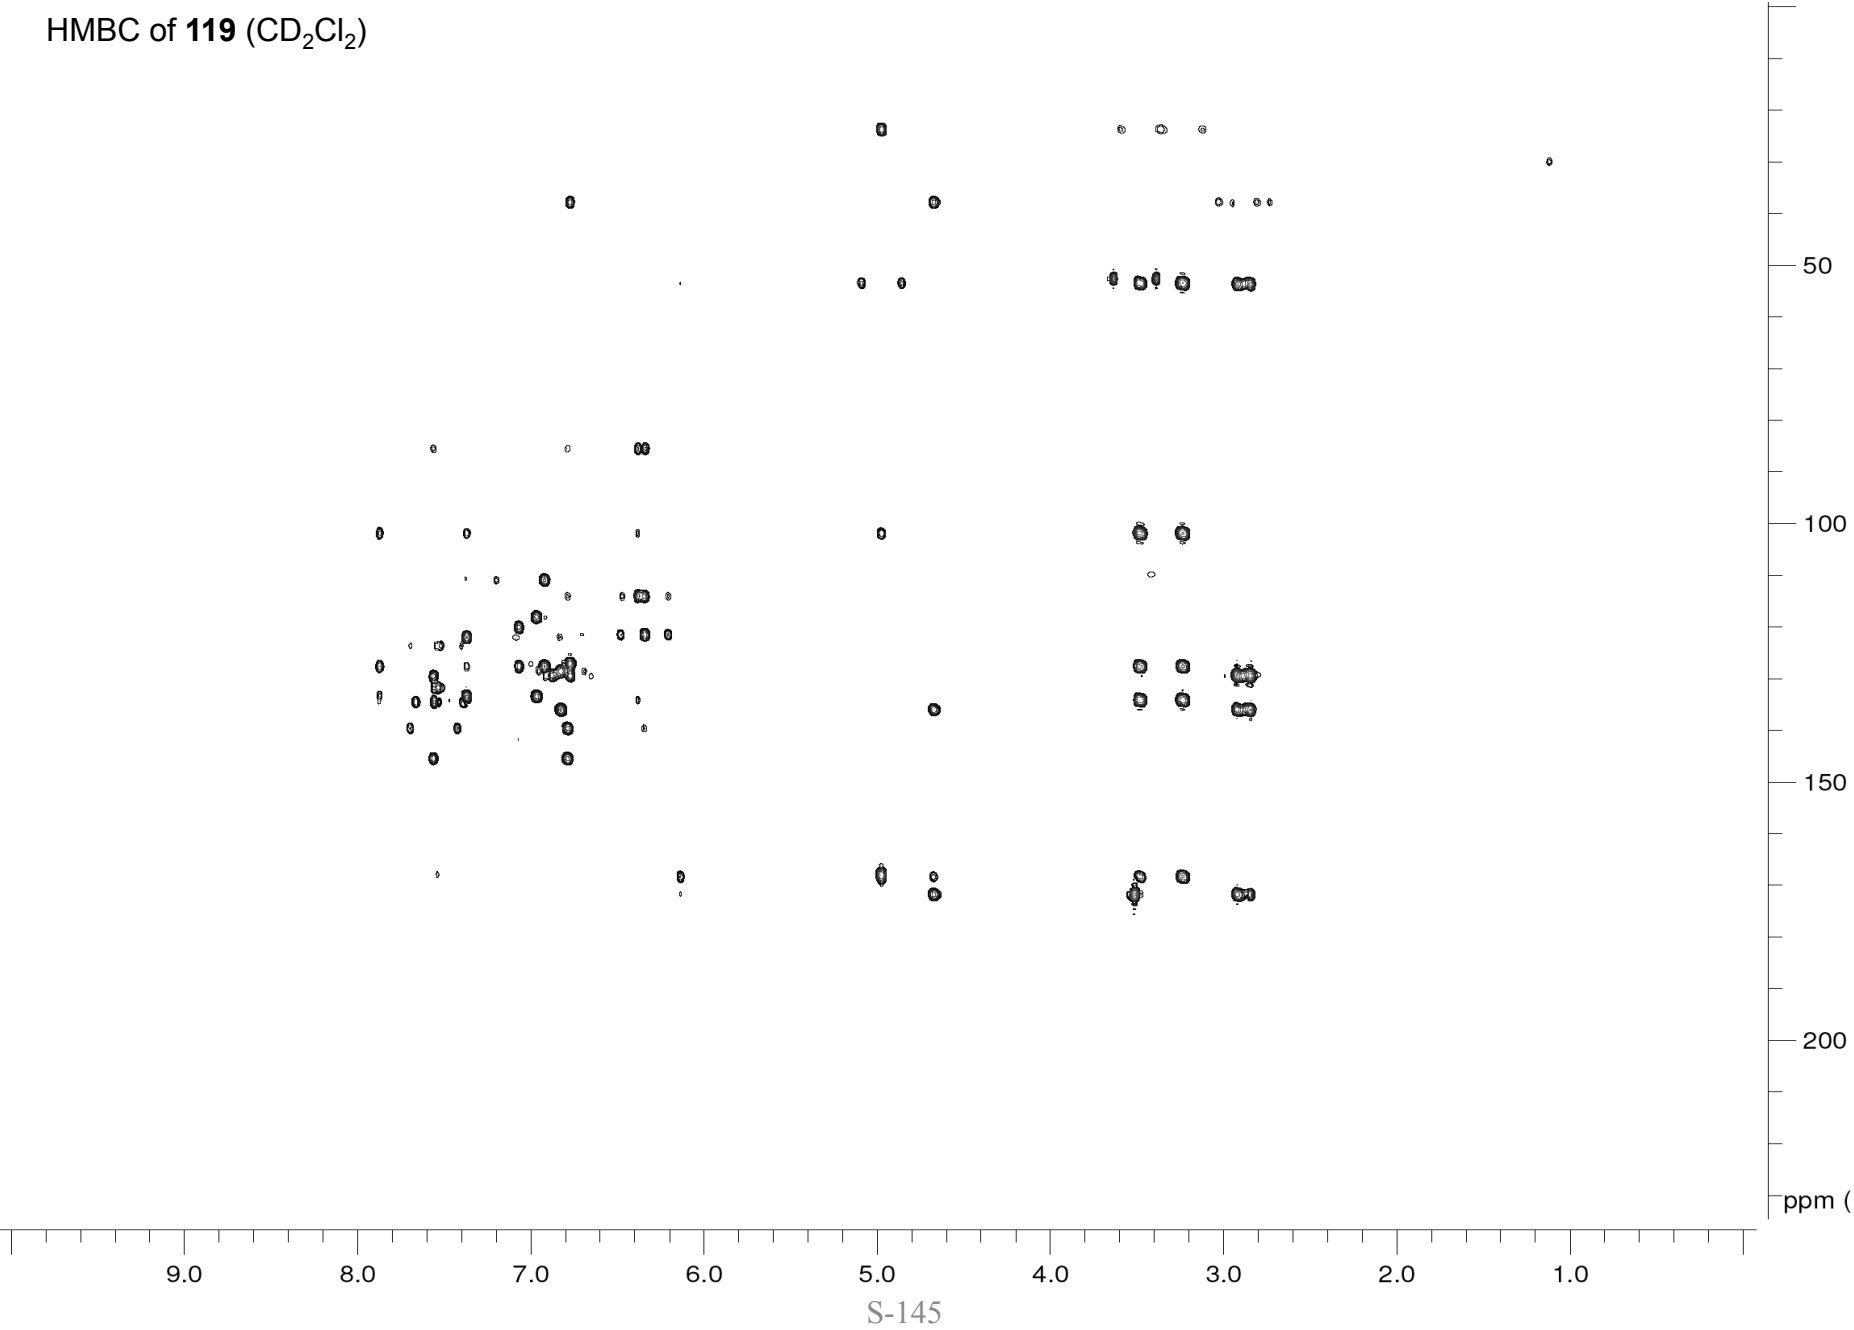

<sup>1</sup>H-NMR of **125**

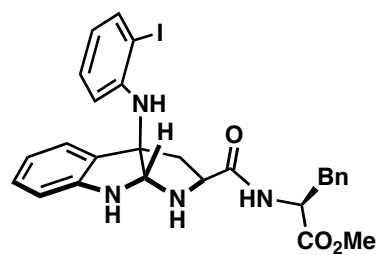

**125**

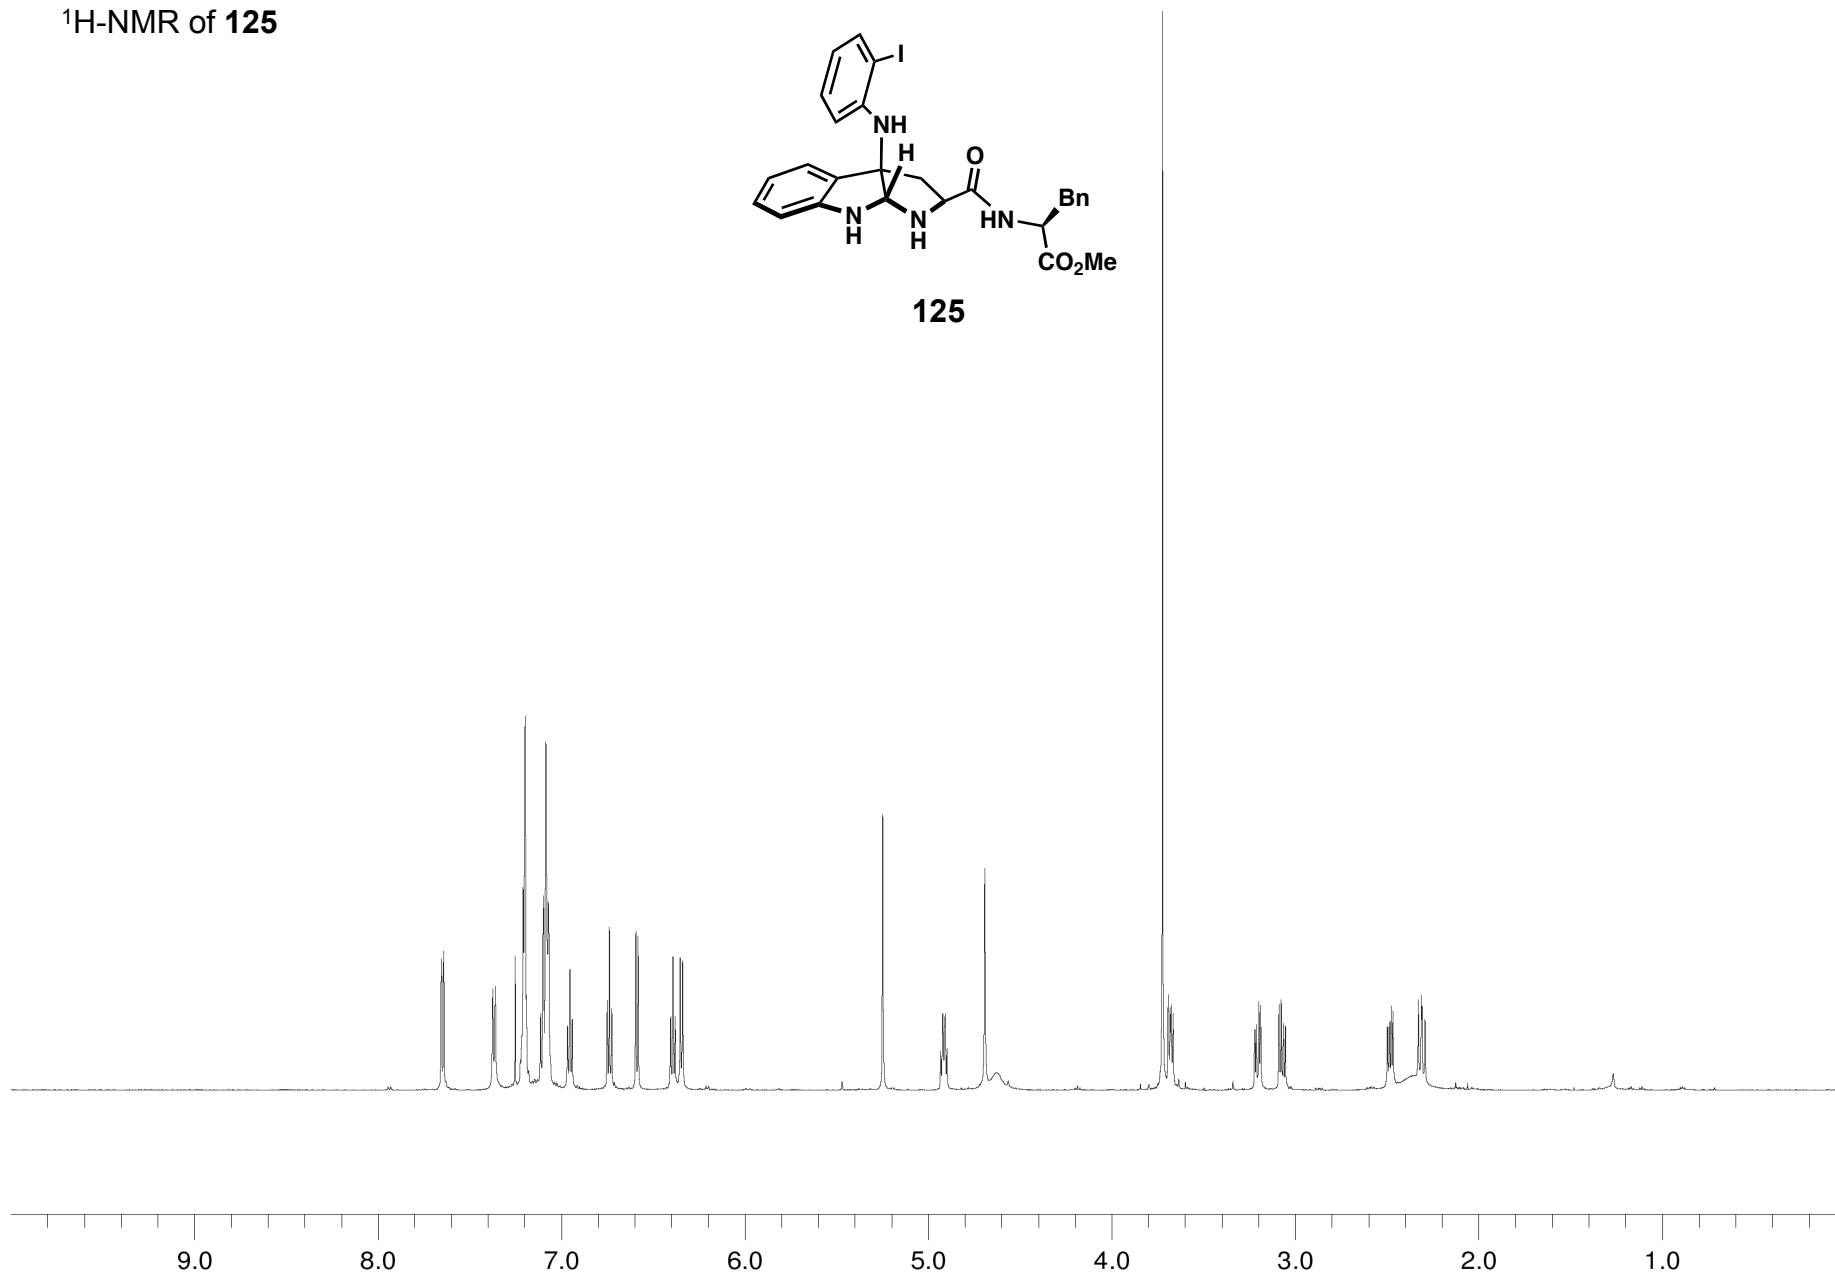

<sup>13</sup>C-NMR of **125**

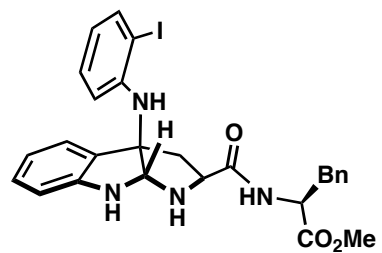

**125**

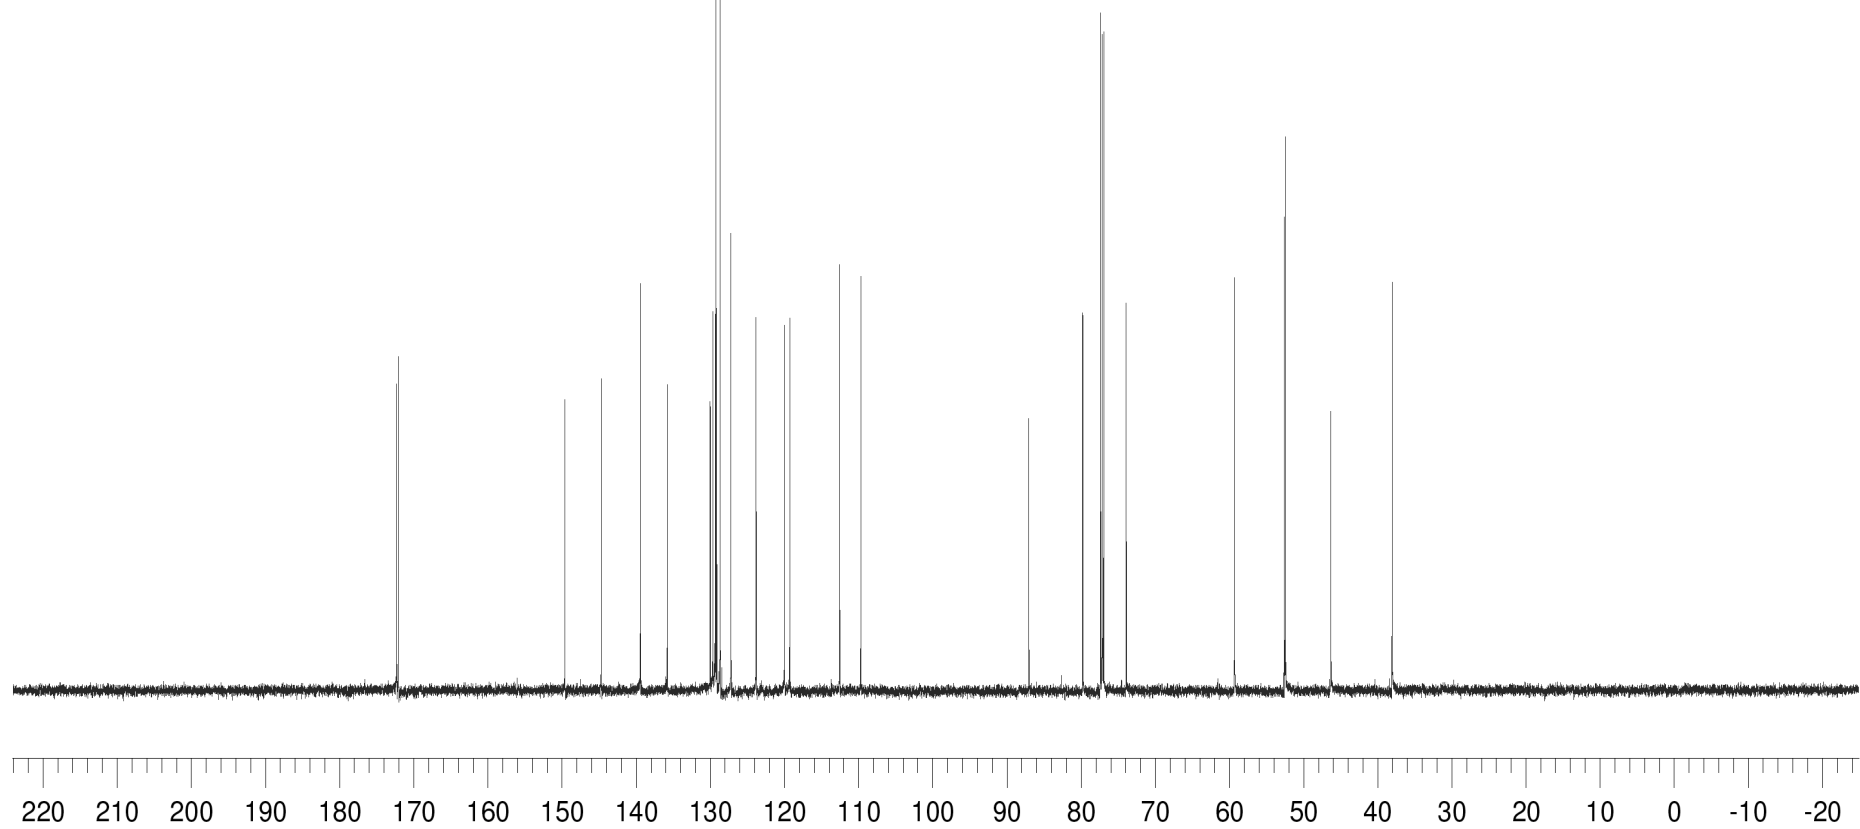

<sup>1</sup>H-NMR of **127**

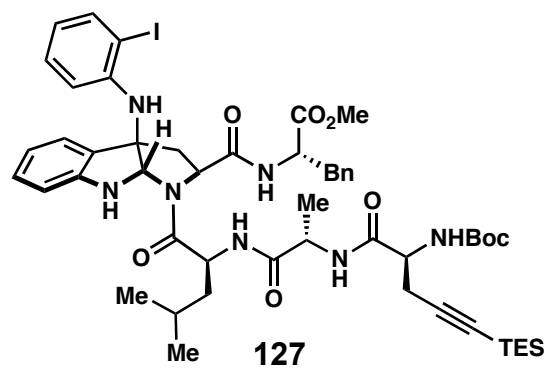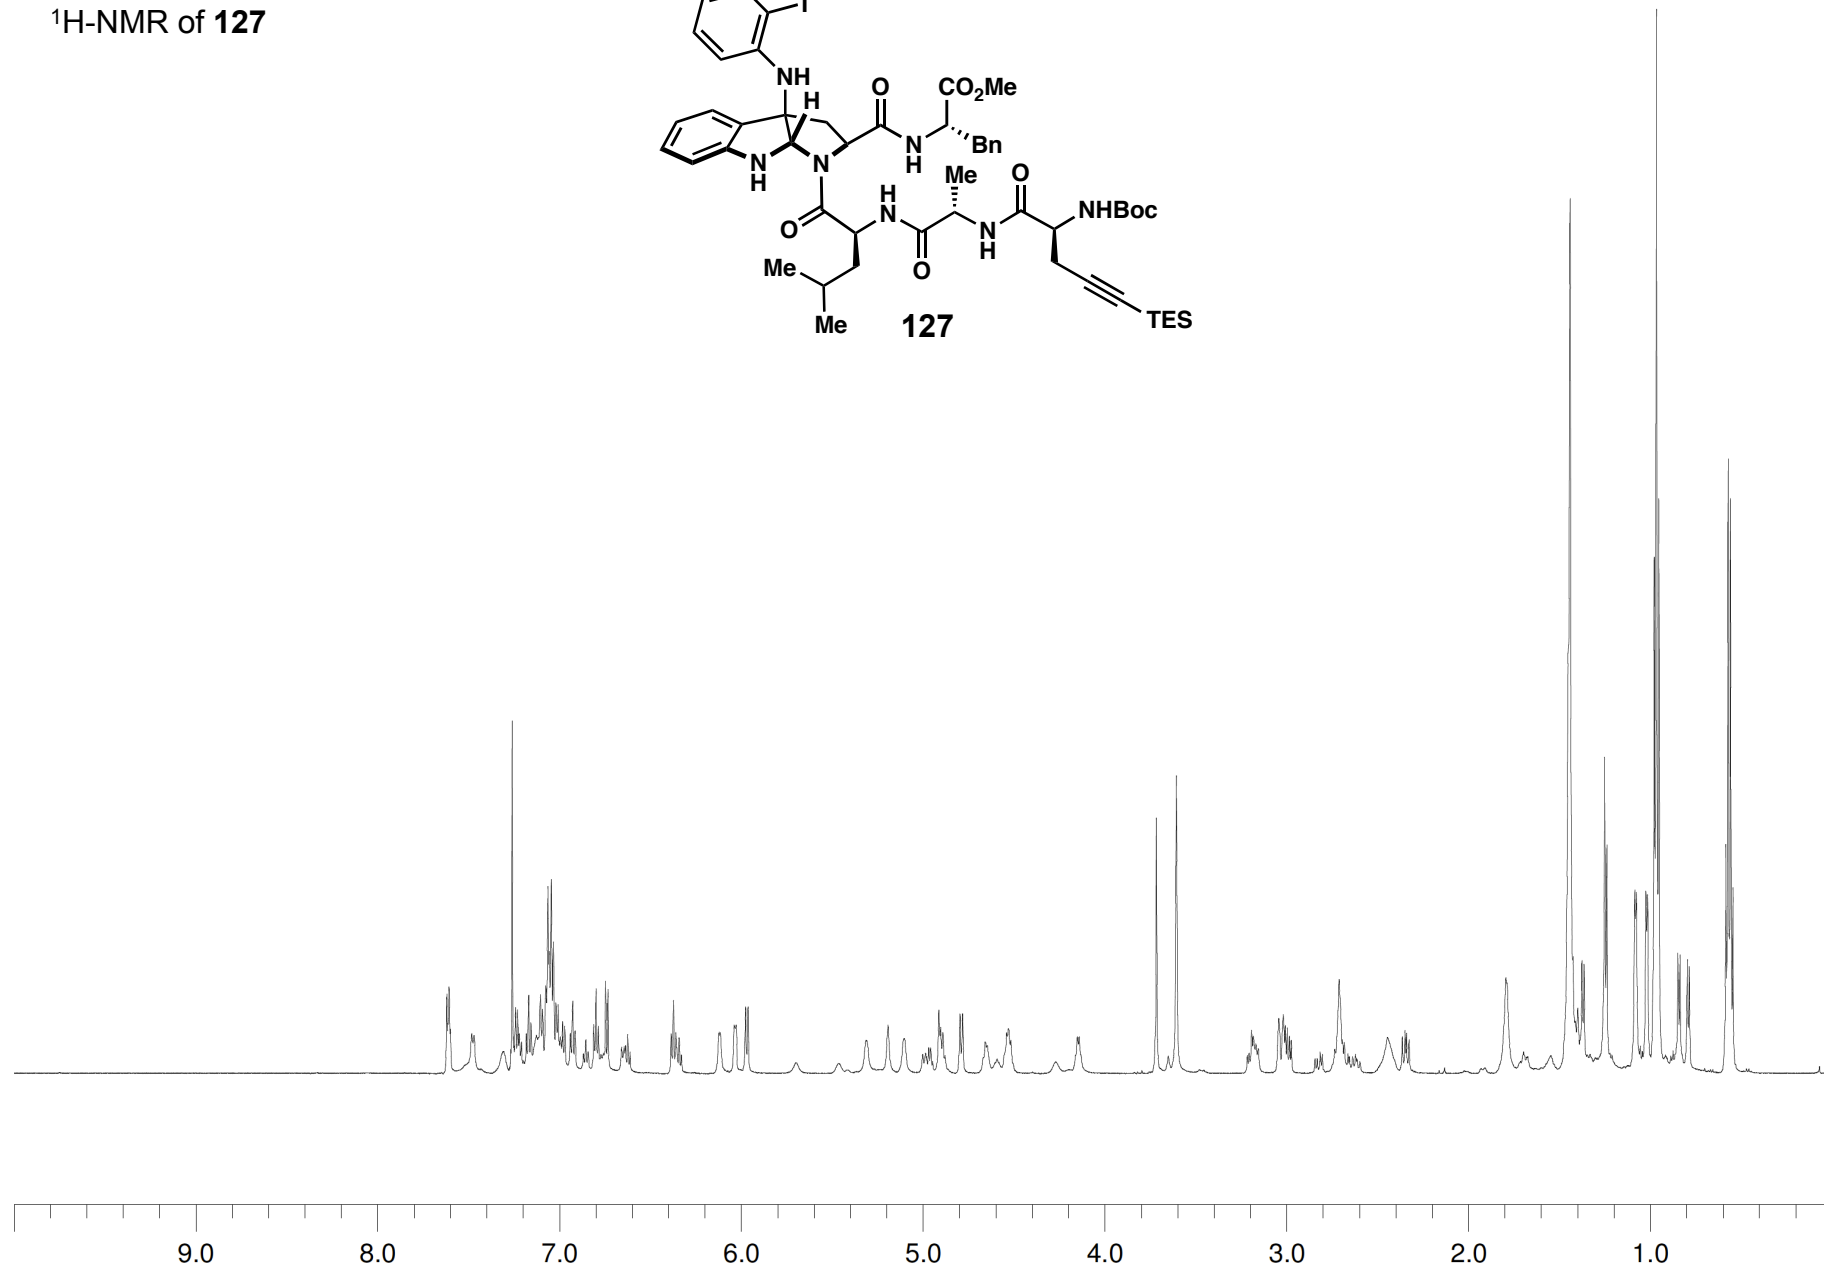

<sup>13</sup>C-NMR of **127**

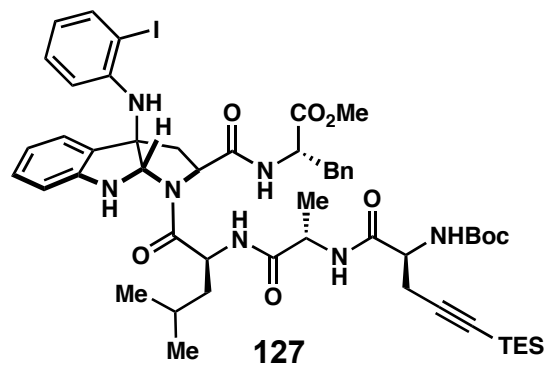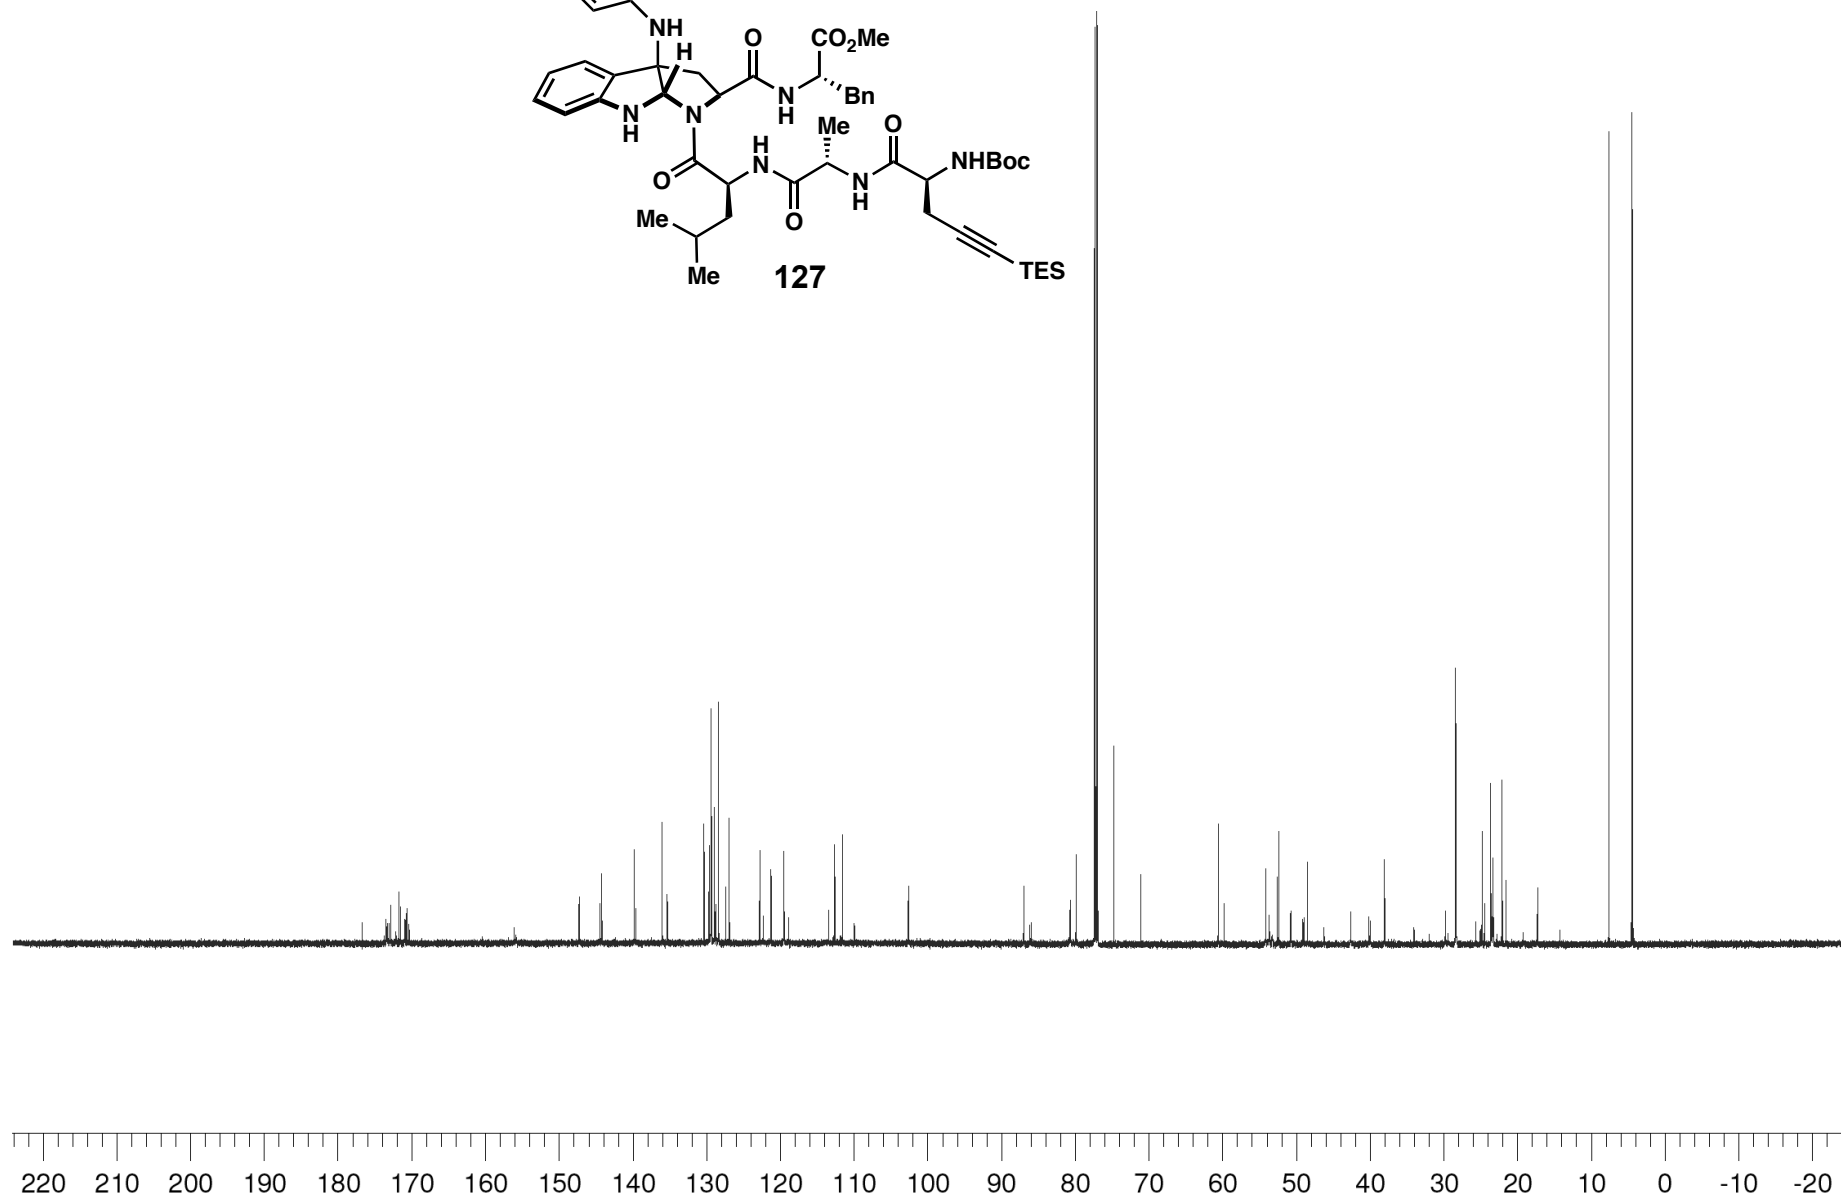

COSY of 127

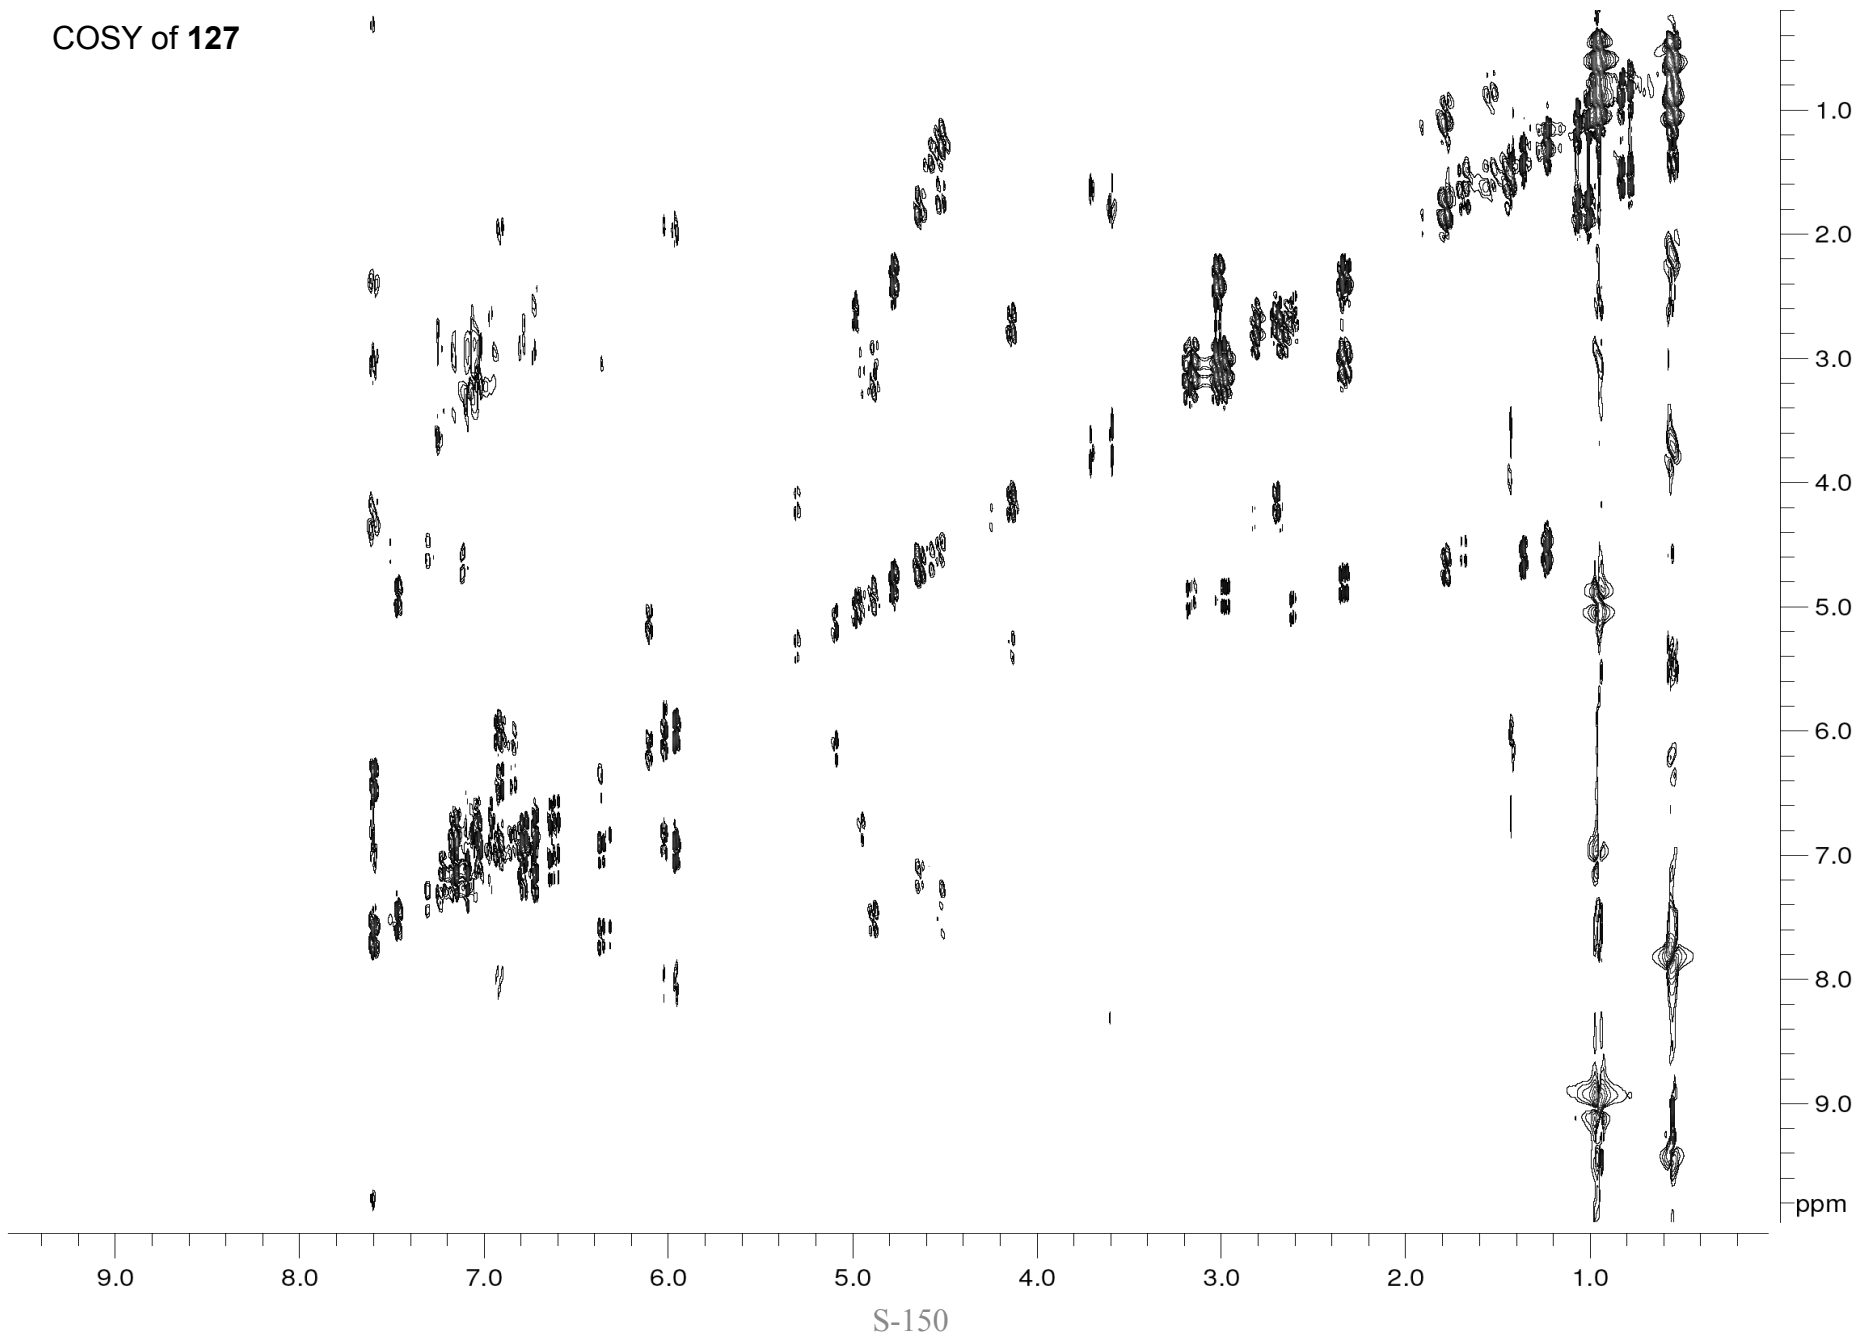



HMQC of 127

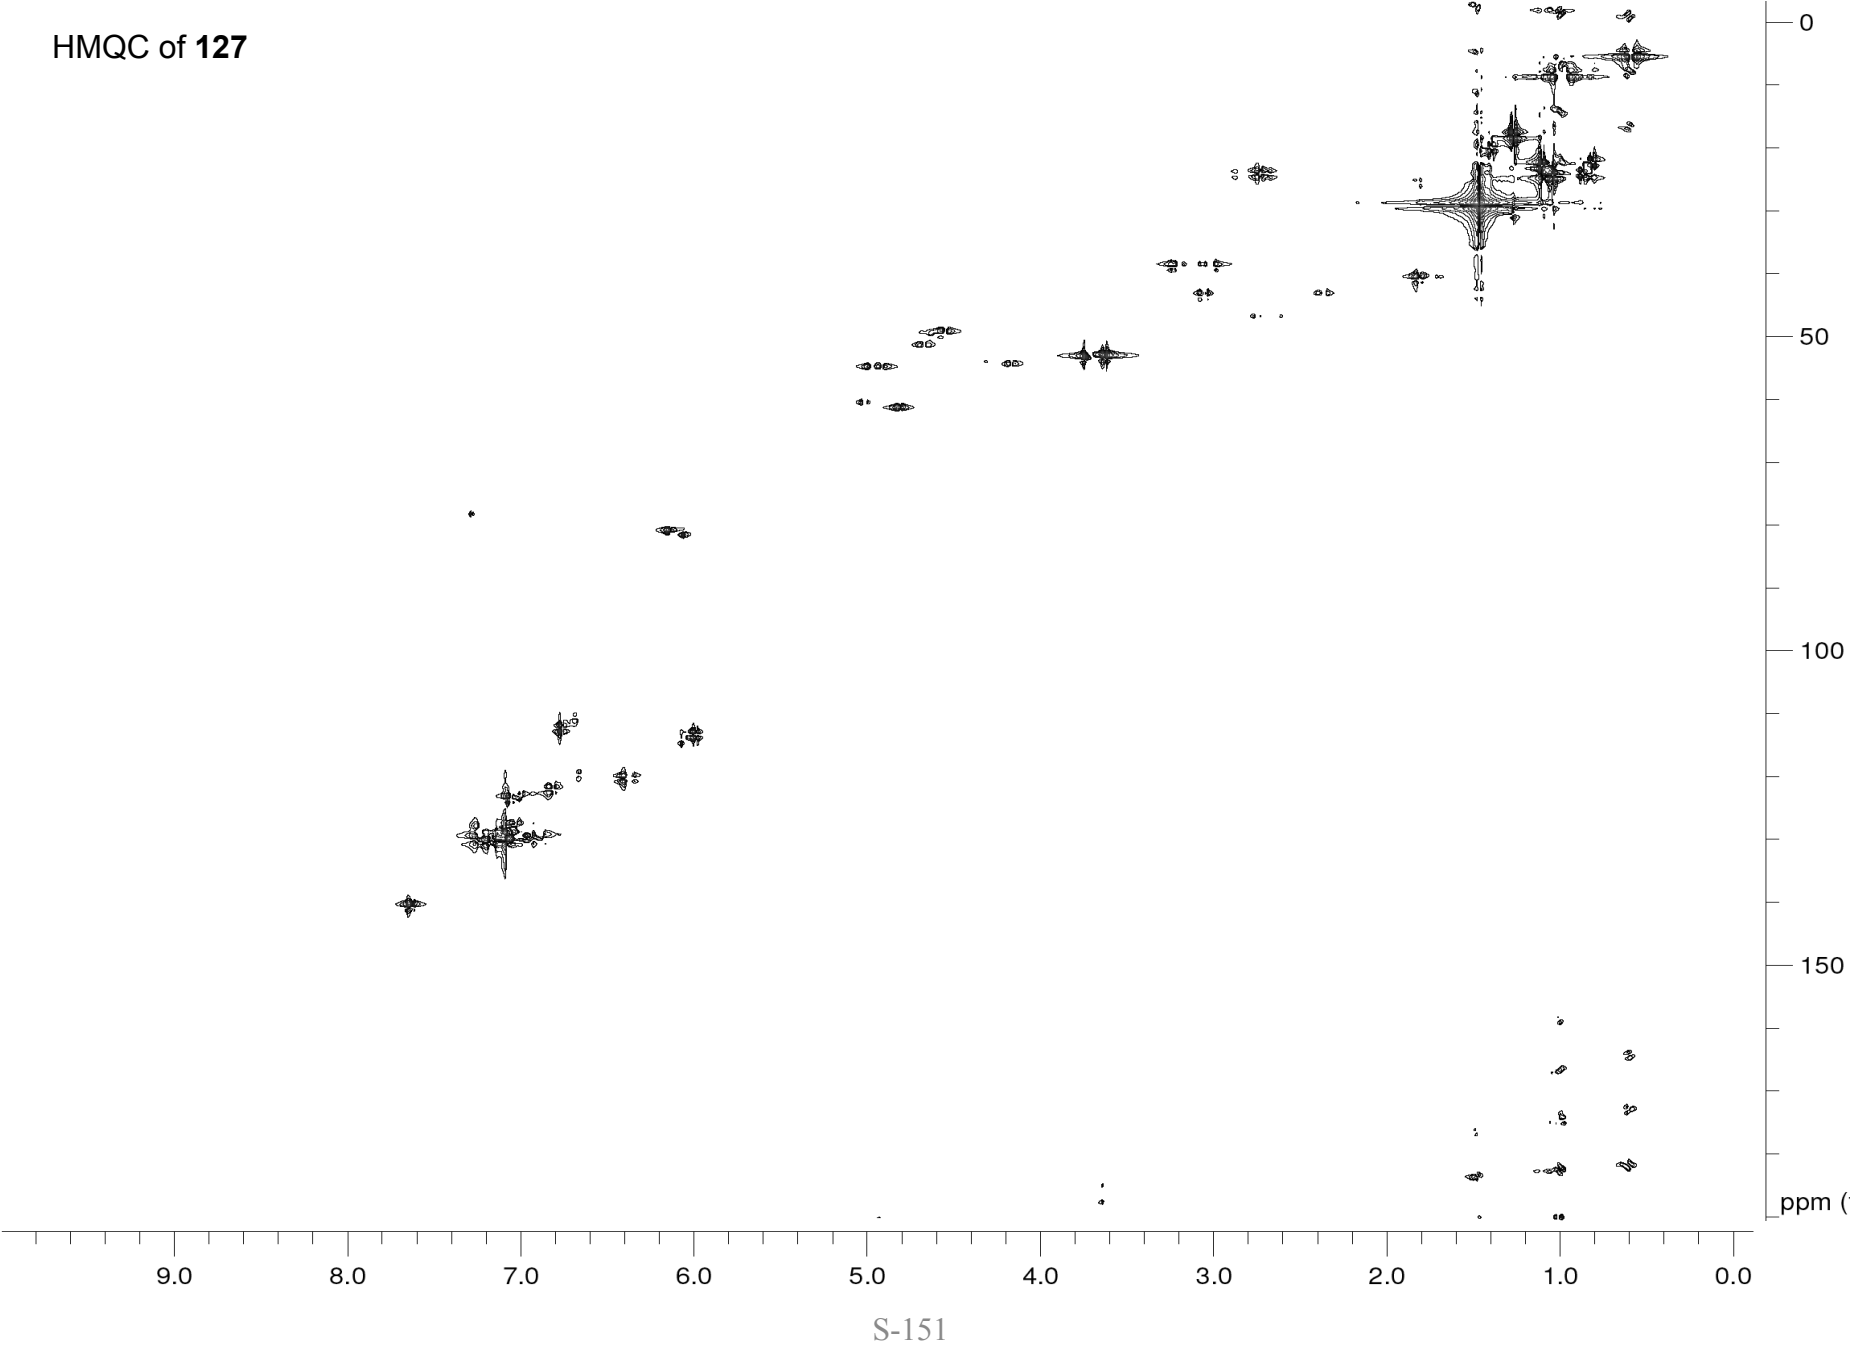

HMBC of 127

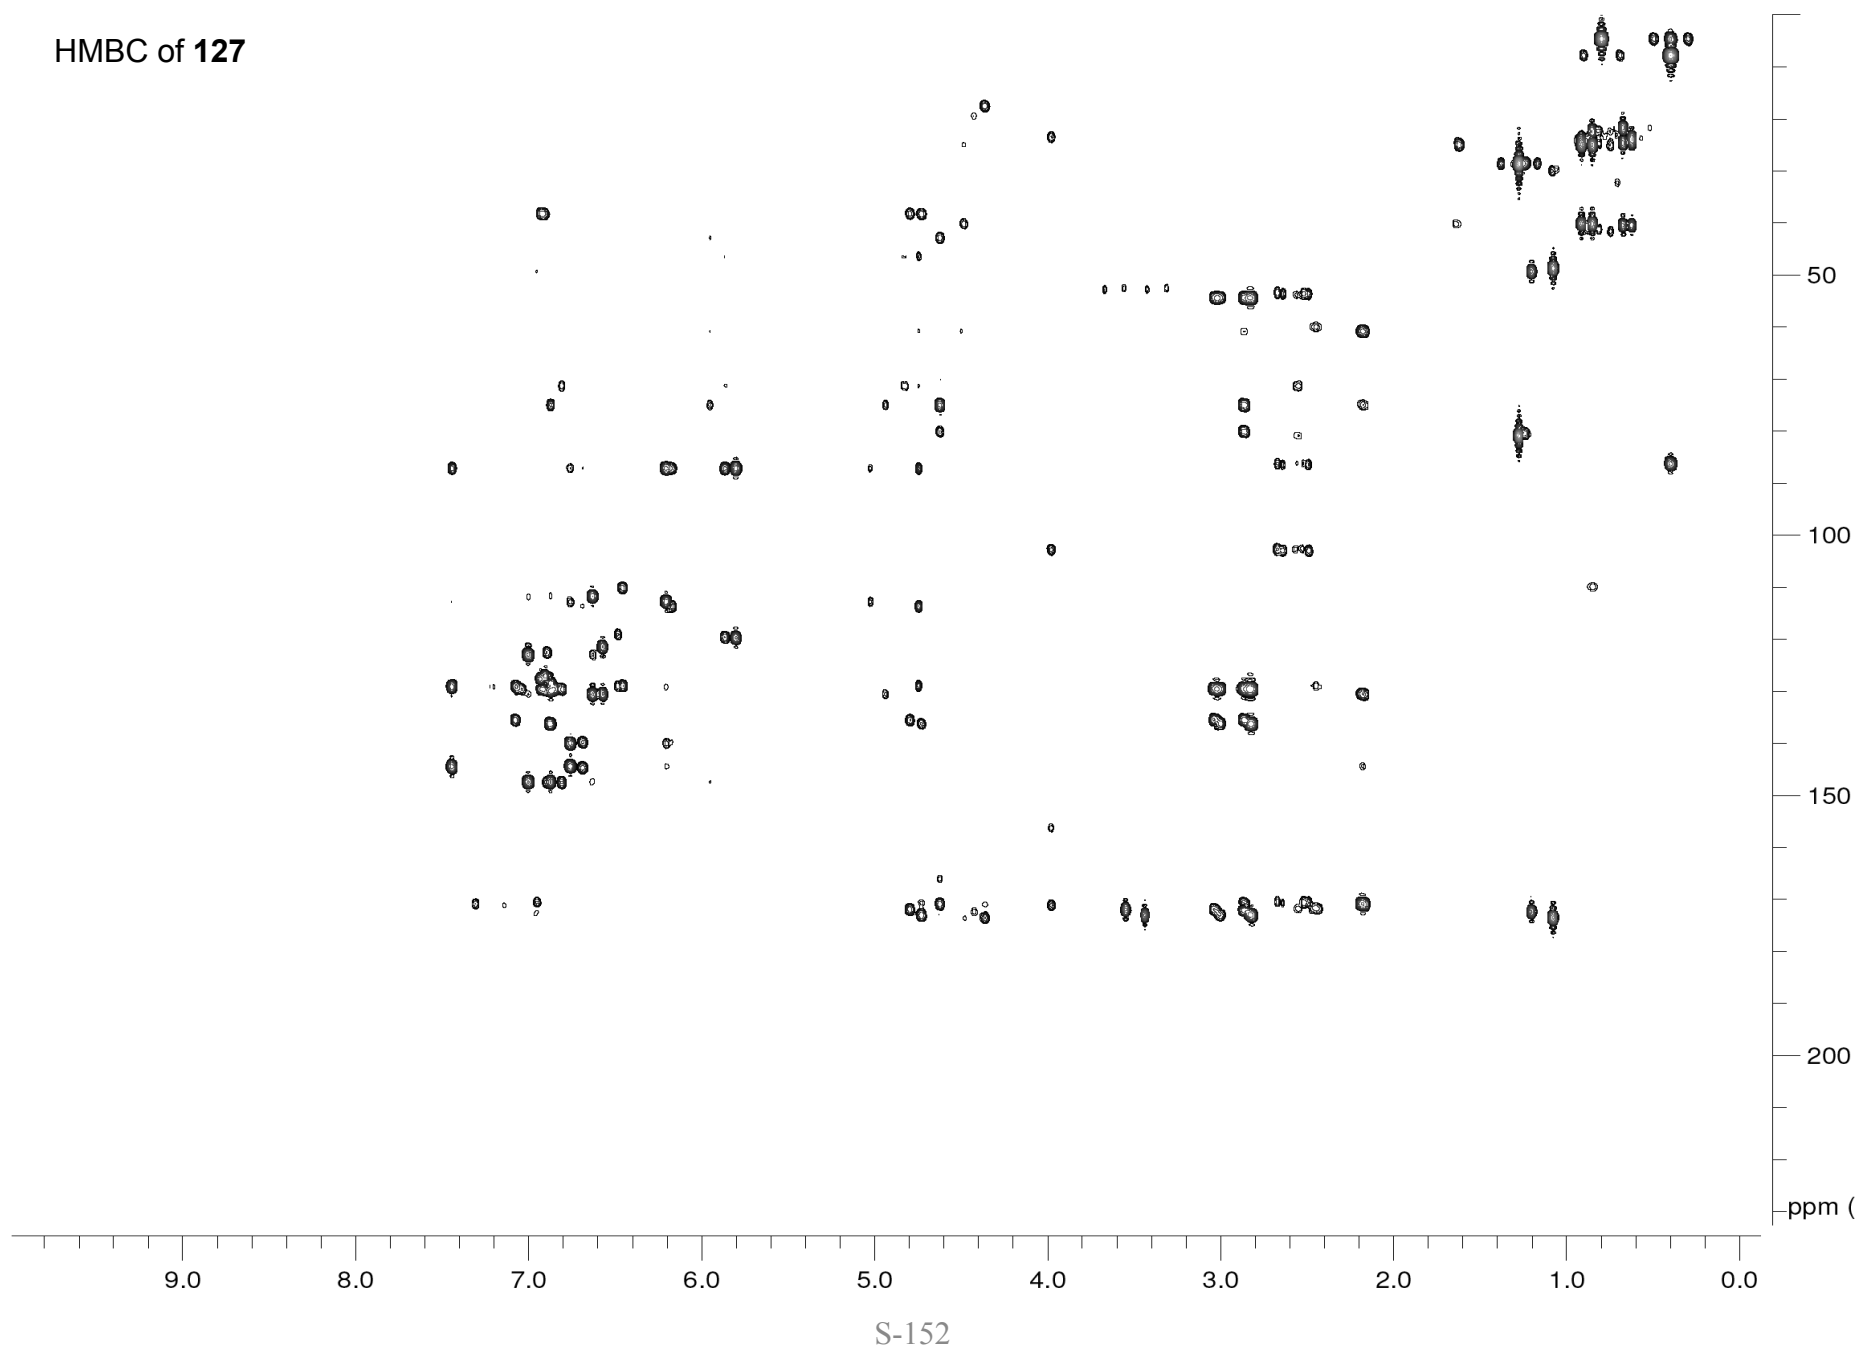

<sup>1</sup>H-NMR of natural psychotrimine (1)

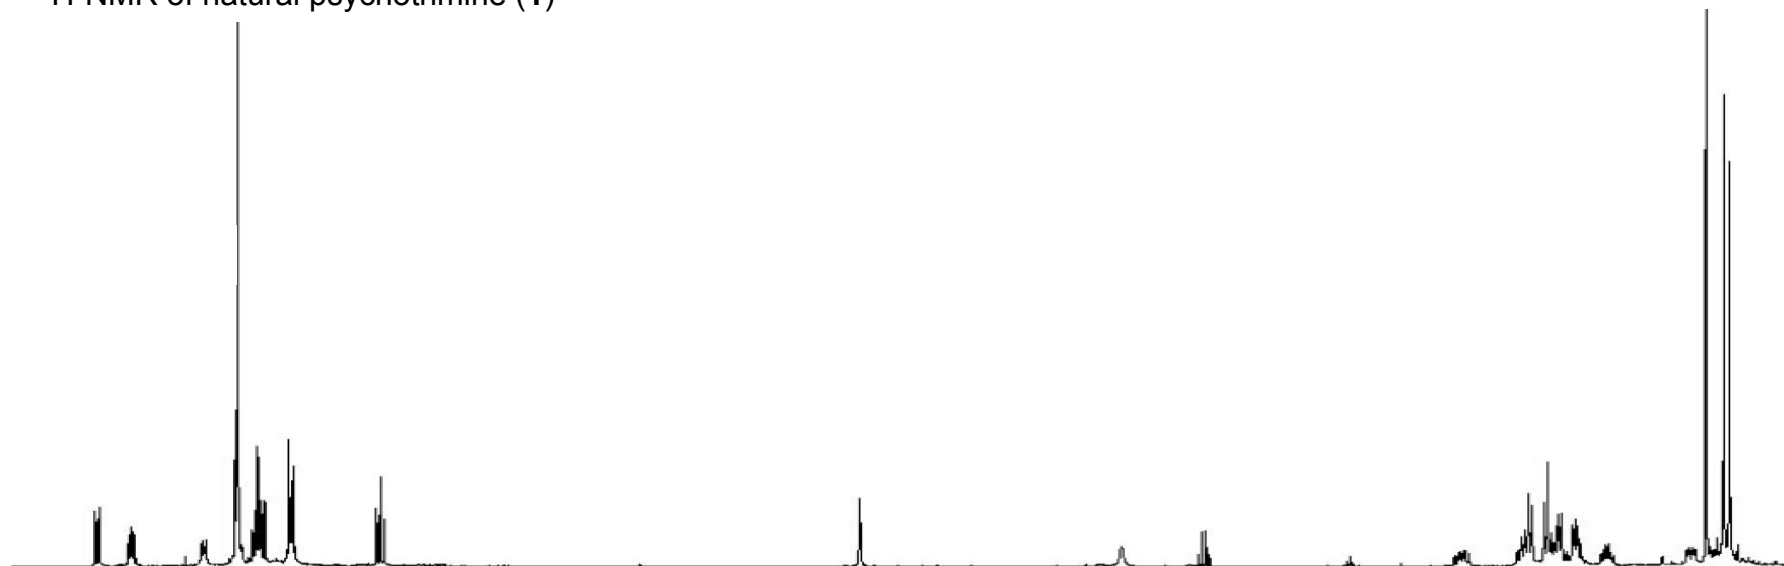

<sup>1</sup>H-NMR of synthetic psychotrimine (1)

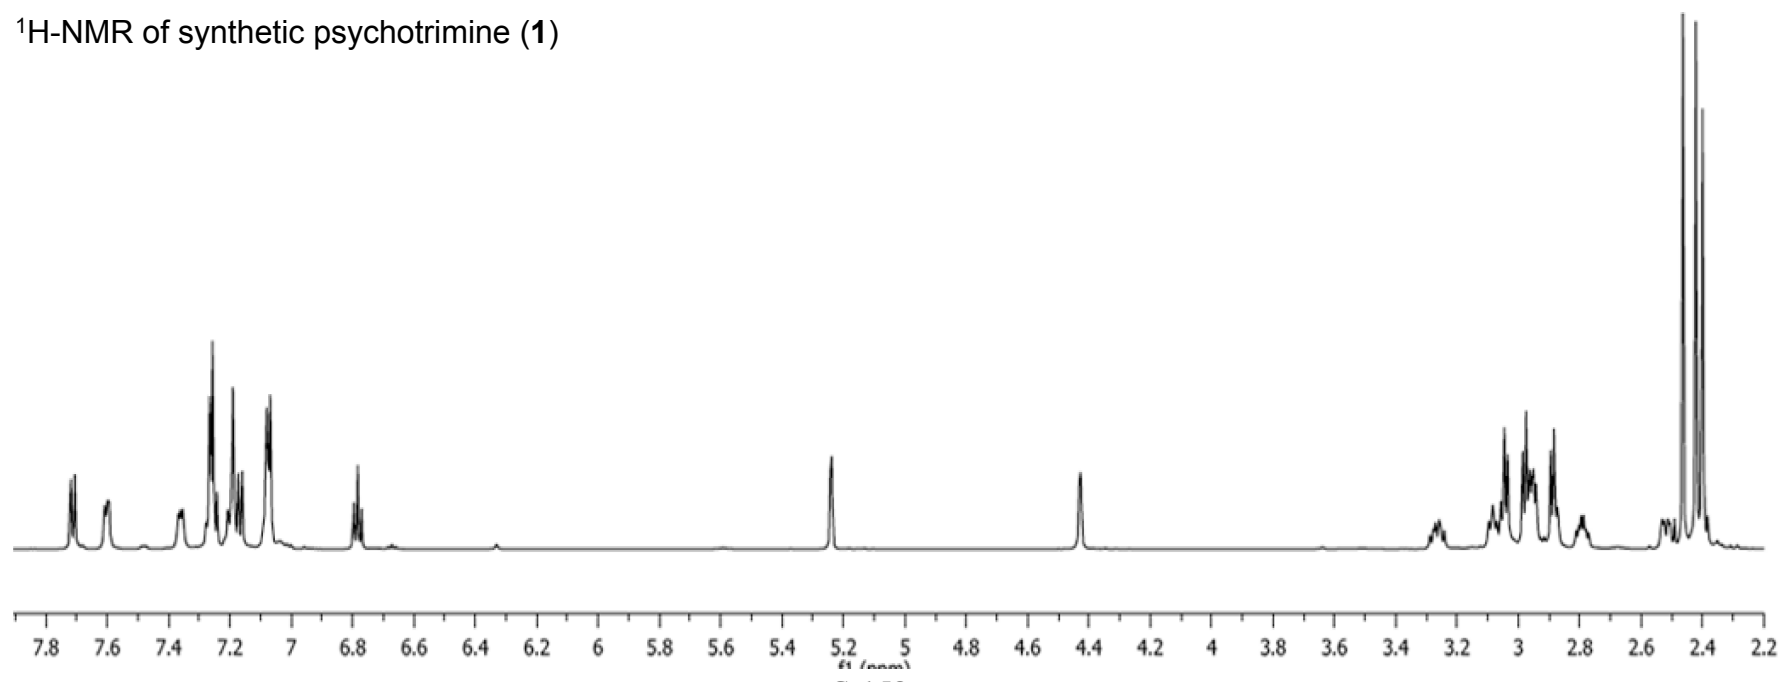

$^{13}\text{C}$ -NMR of natural psychotrimine (1)

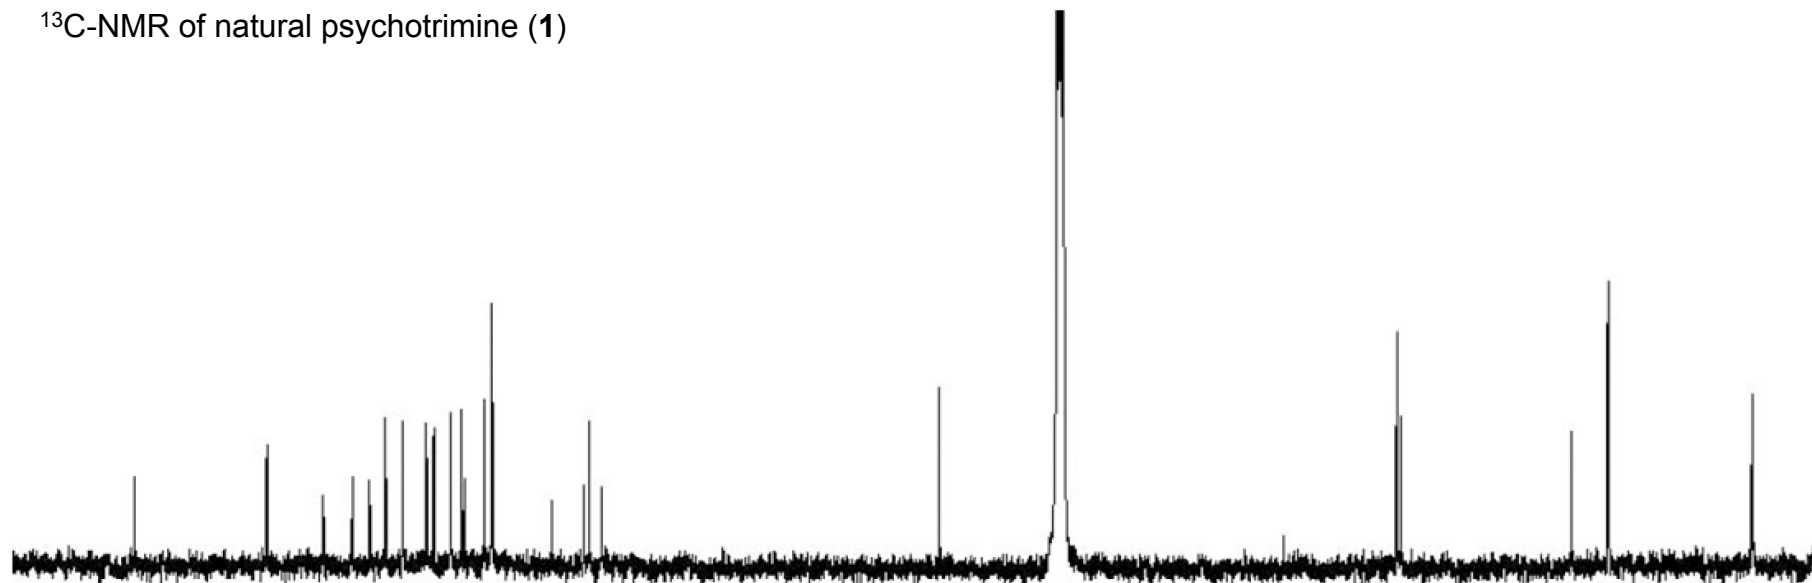

$^{13}\text{C}$ -NMR of synthetic psychotrimine (1)

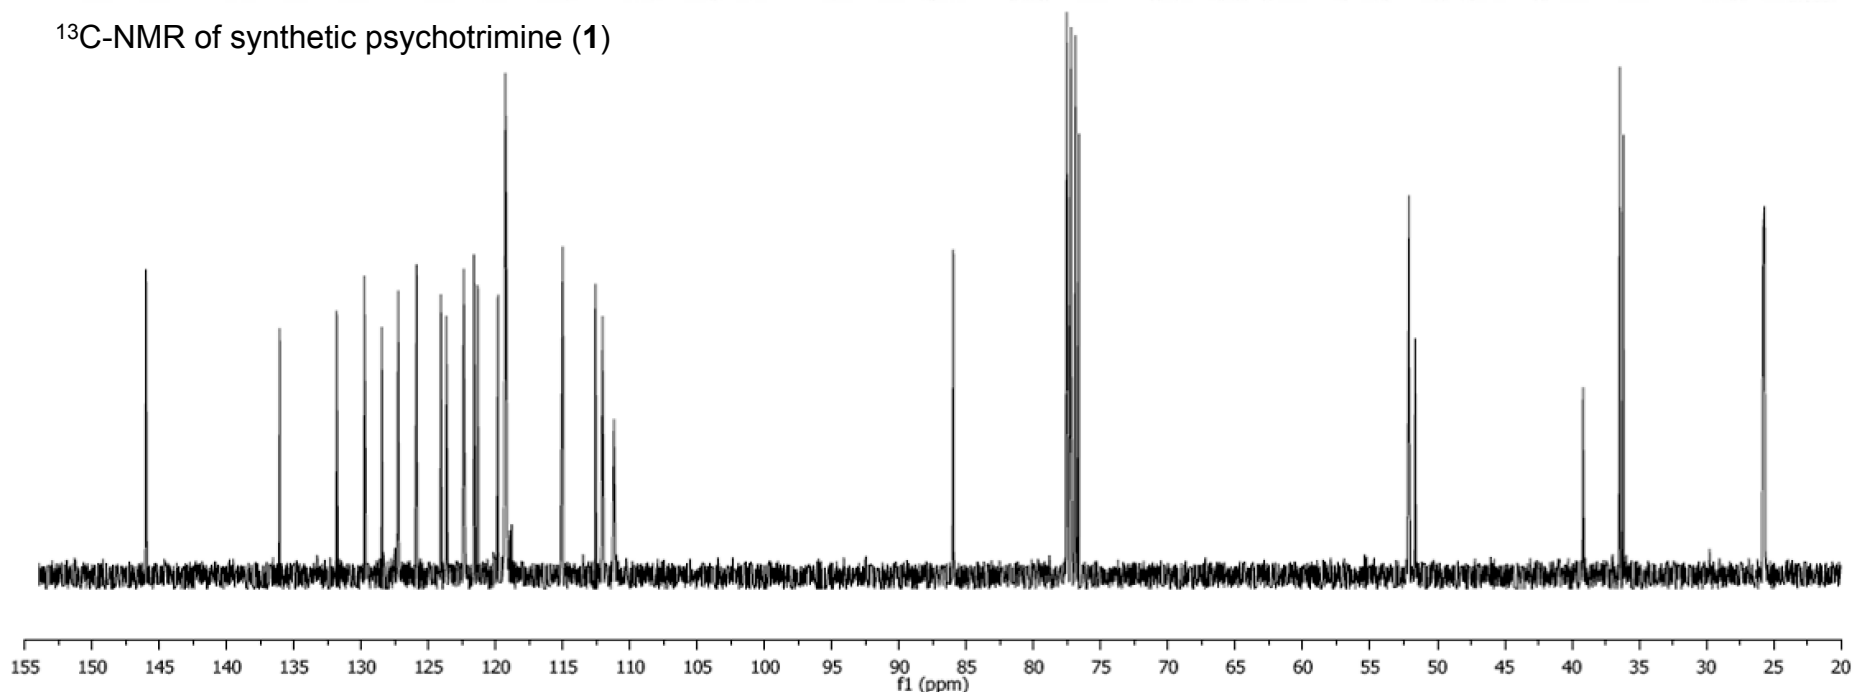

<sup>1</sup>H-NMR of kapakahine F (**2**) TFA salt  
CD<sub>3</sub>CN

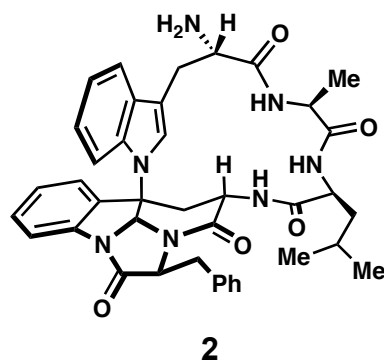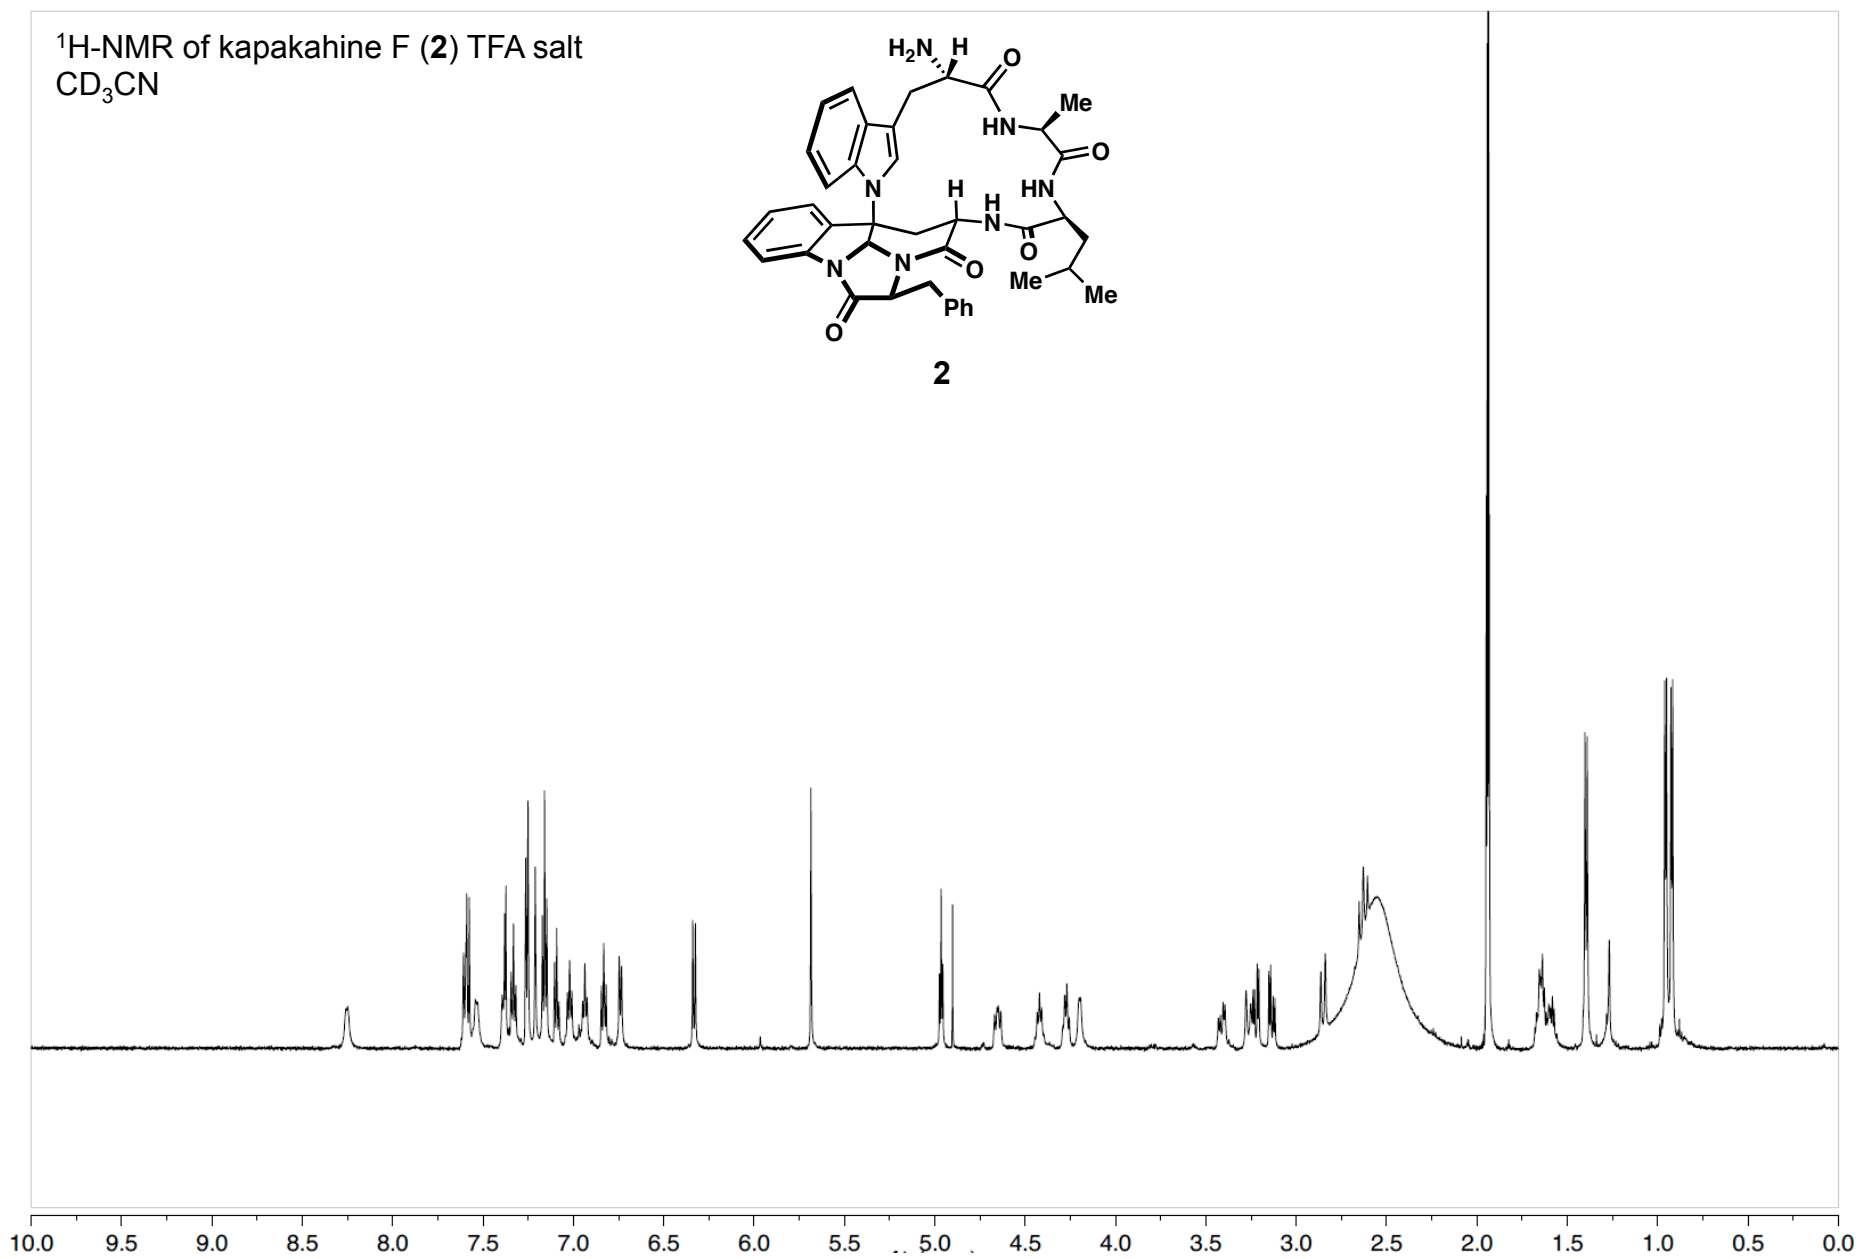

$^{13}\text{C}$ -NMR of kapakahine F (**2**) TFA salt  
 $\text{CD}_3\text{CN}$

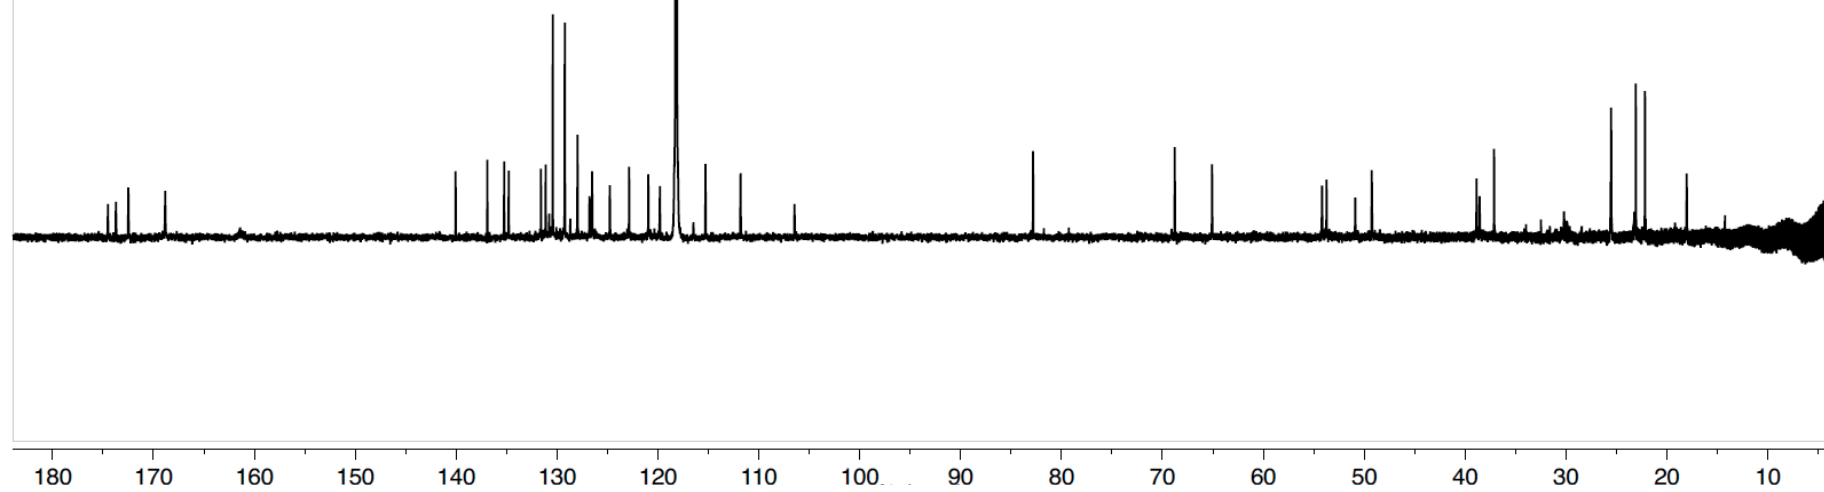

<sup>1</sup>H-NMR of kapakahine F (**2**) TFA salt  
CD<sub>3</sub>CN/CD<sub>3</sub>OH/AcOH 200/100/1

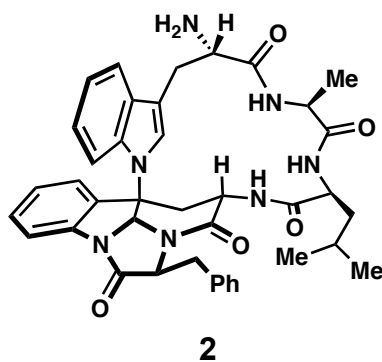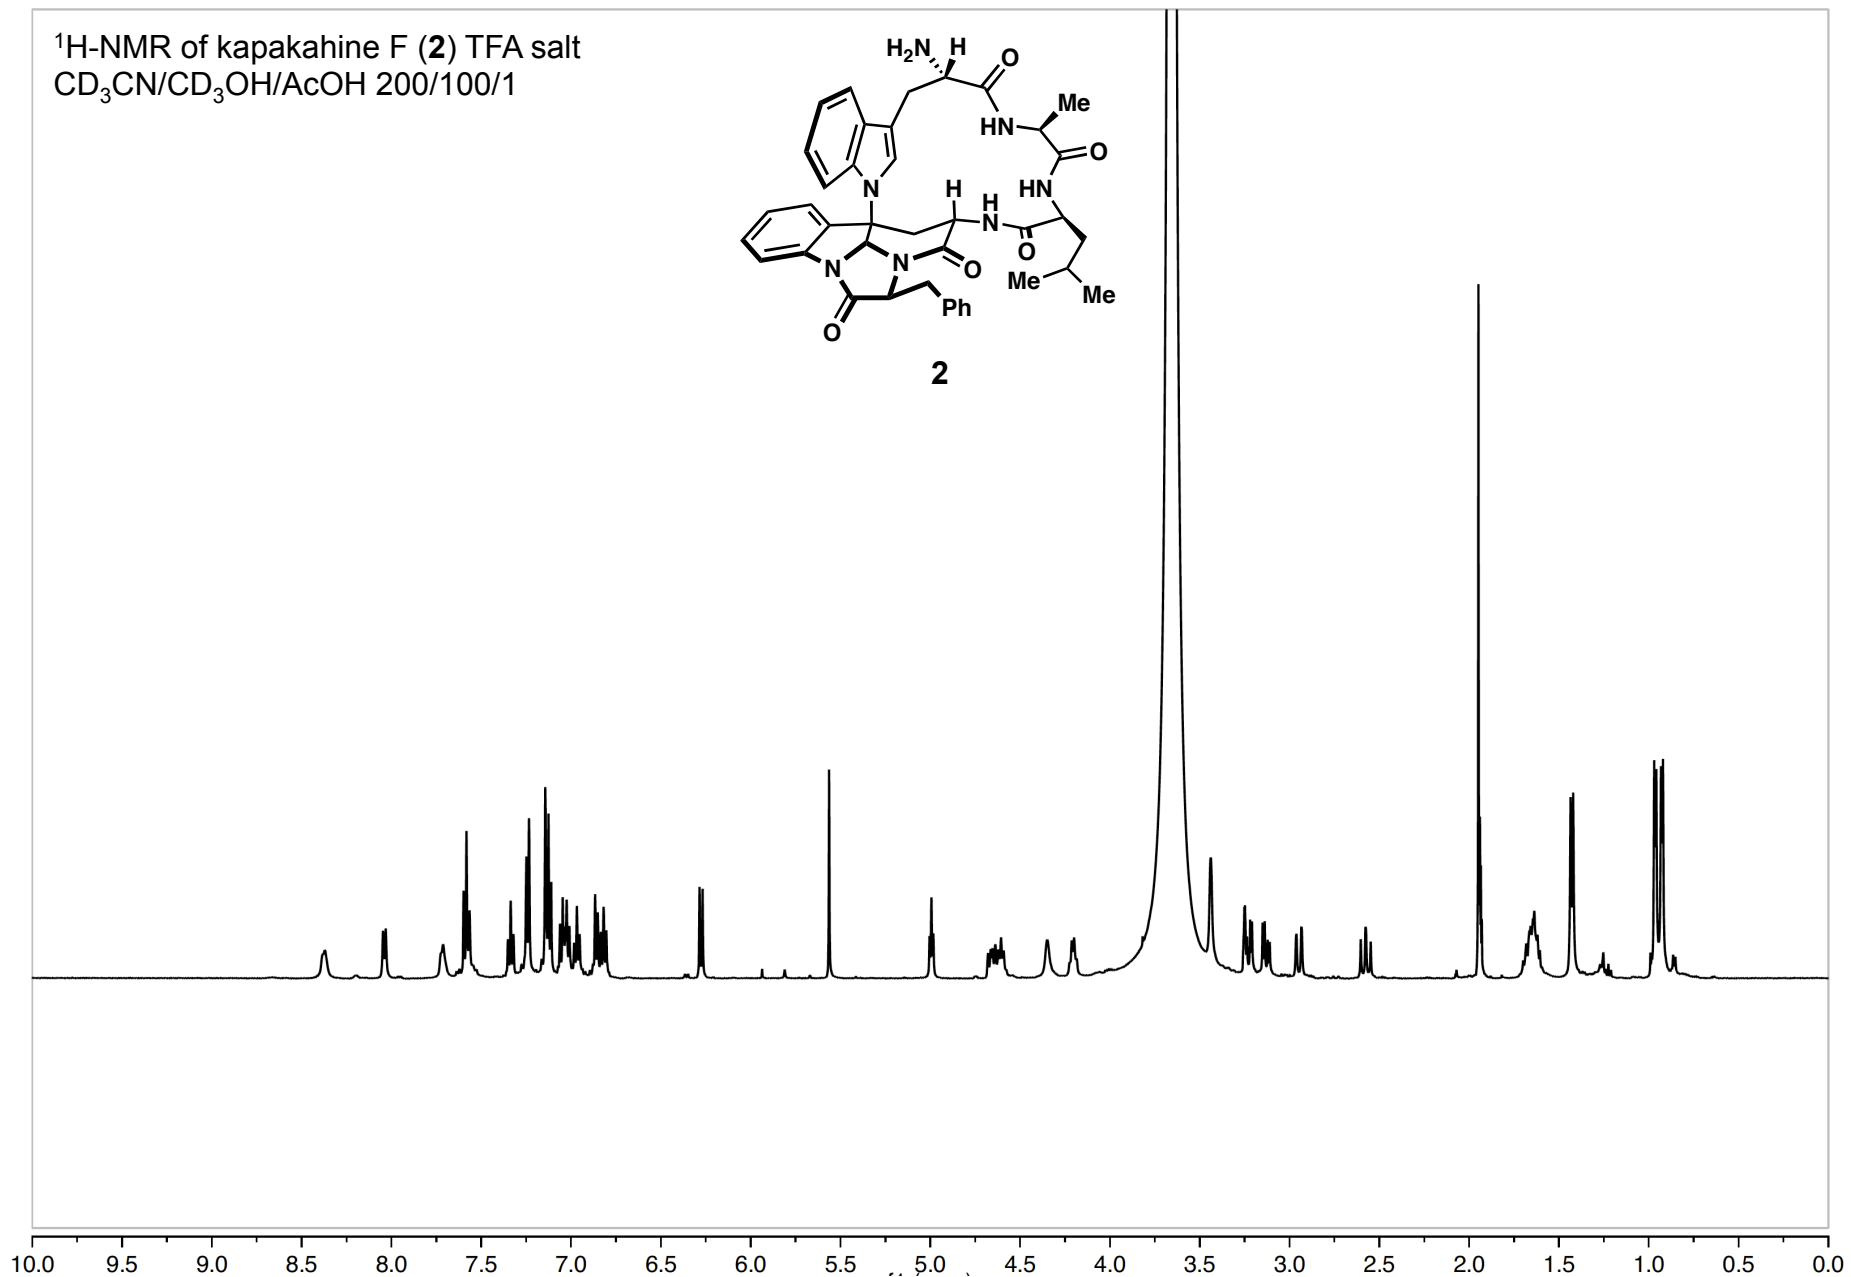

<sup>13</sup>C-NMR of kapakahine F (**2**) TFA salt  
CD<sub>3</sub>CN/CD<sub>3</sub>OH/AcOH 200/100/1

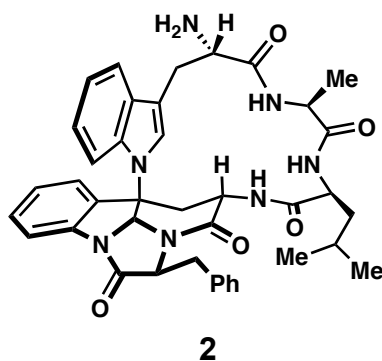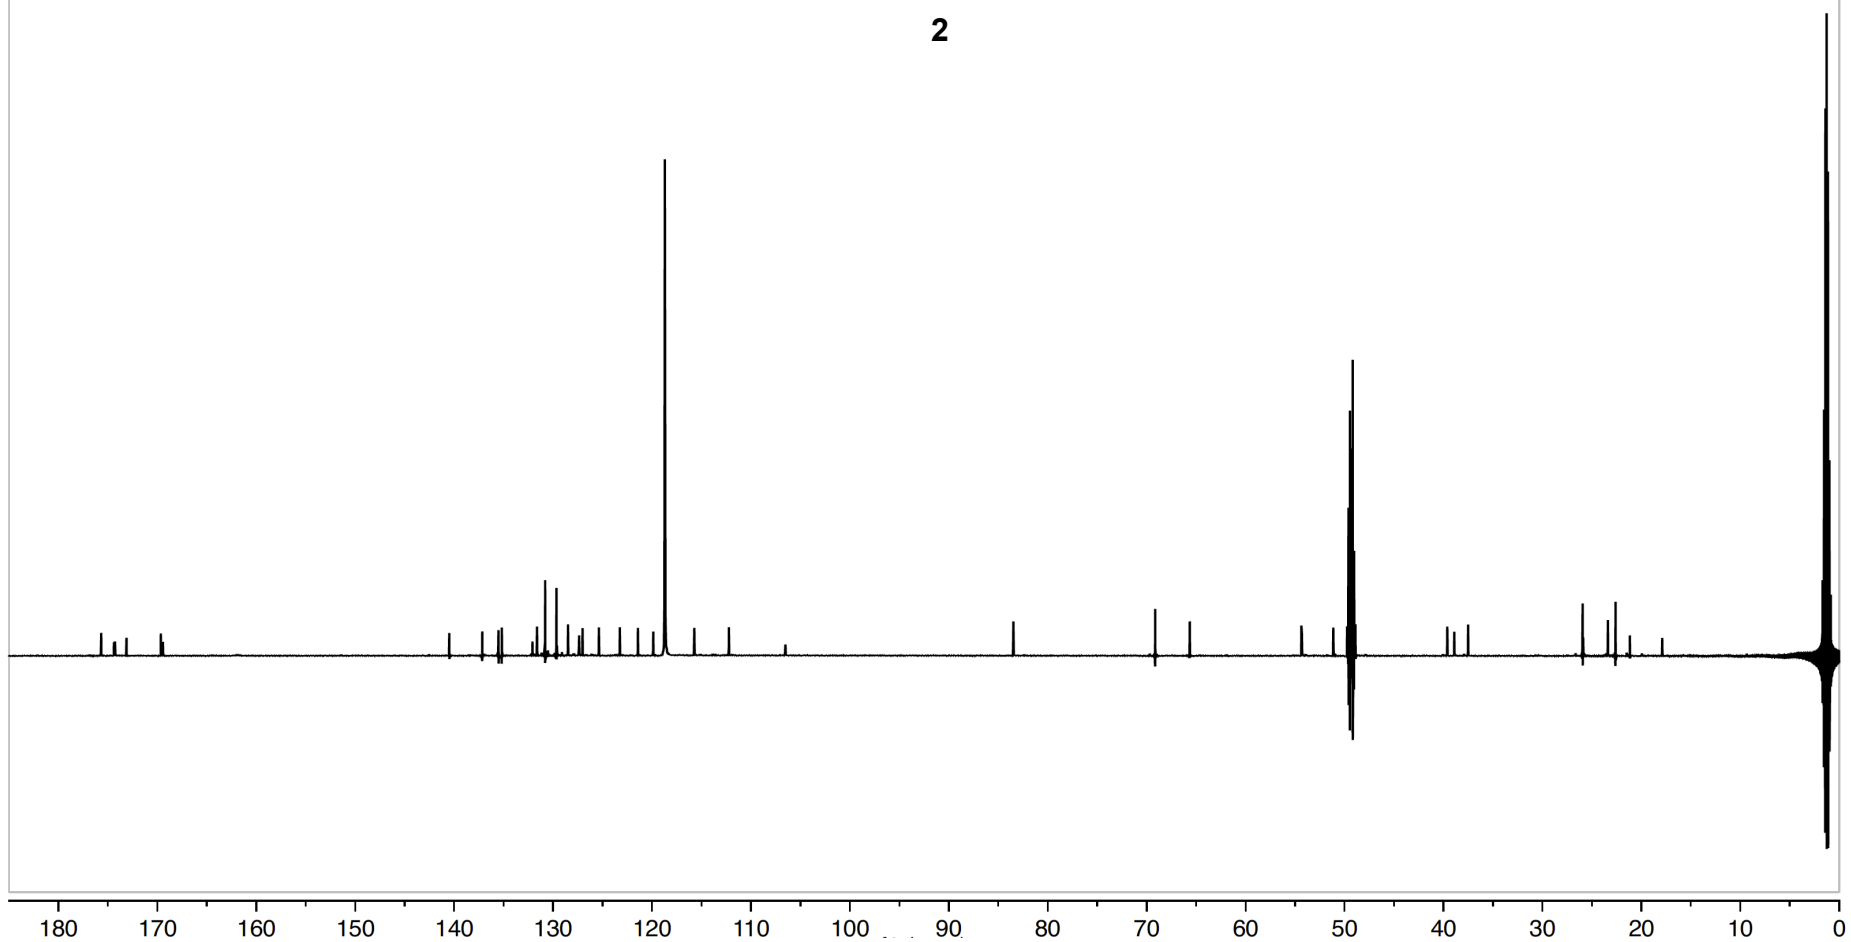



HMQC of kapakahine F (2) TFA salt  
CD<sub>3</sub>CN/CD<sub>3</sub>OH/AcOH 200/100/1

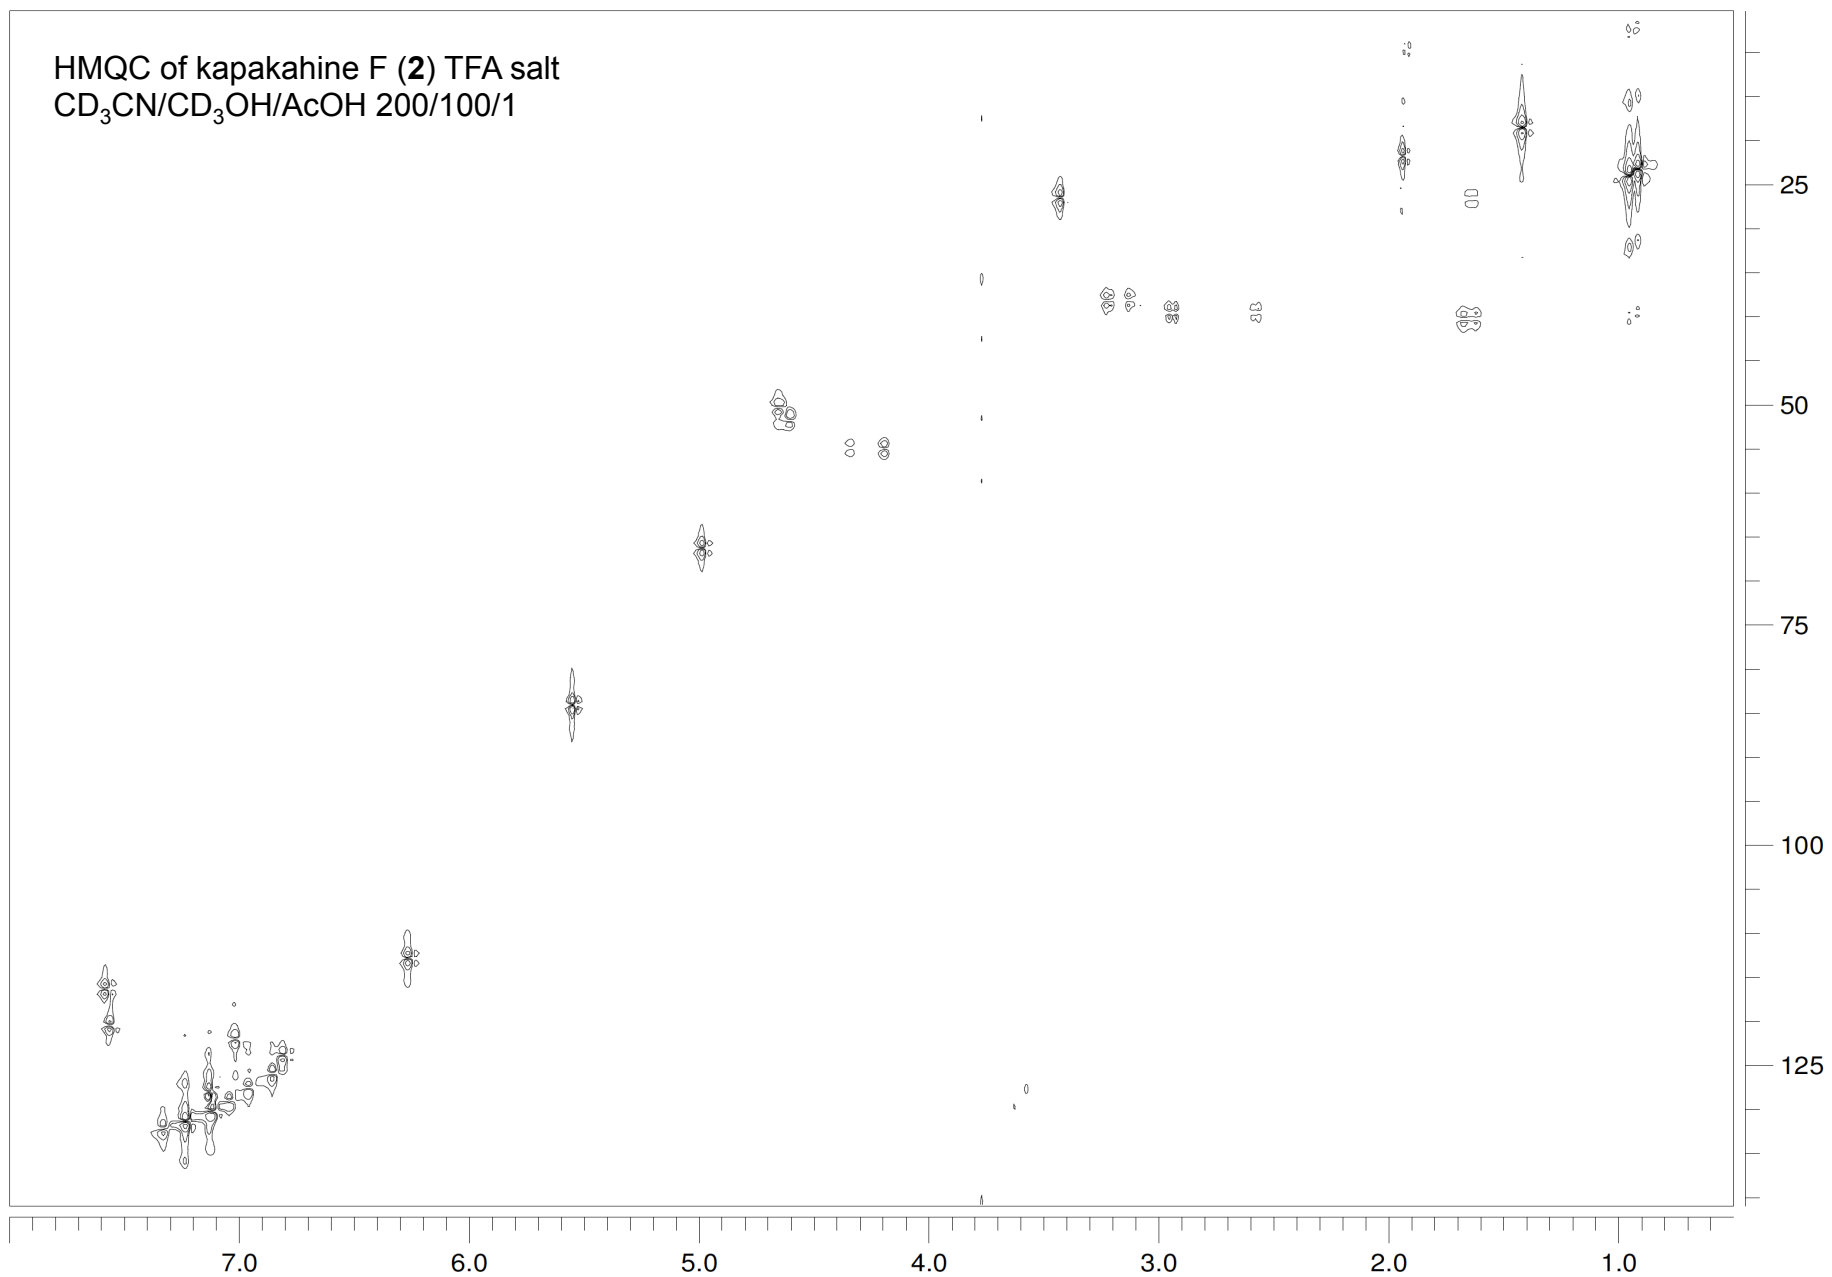

HMBC of kapakahine F (2) TFA salt  
CD<sub>3</sub>CN/CD<sub>3</sub>OH/AcOH 200/100/1

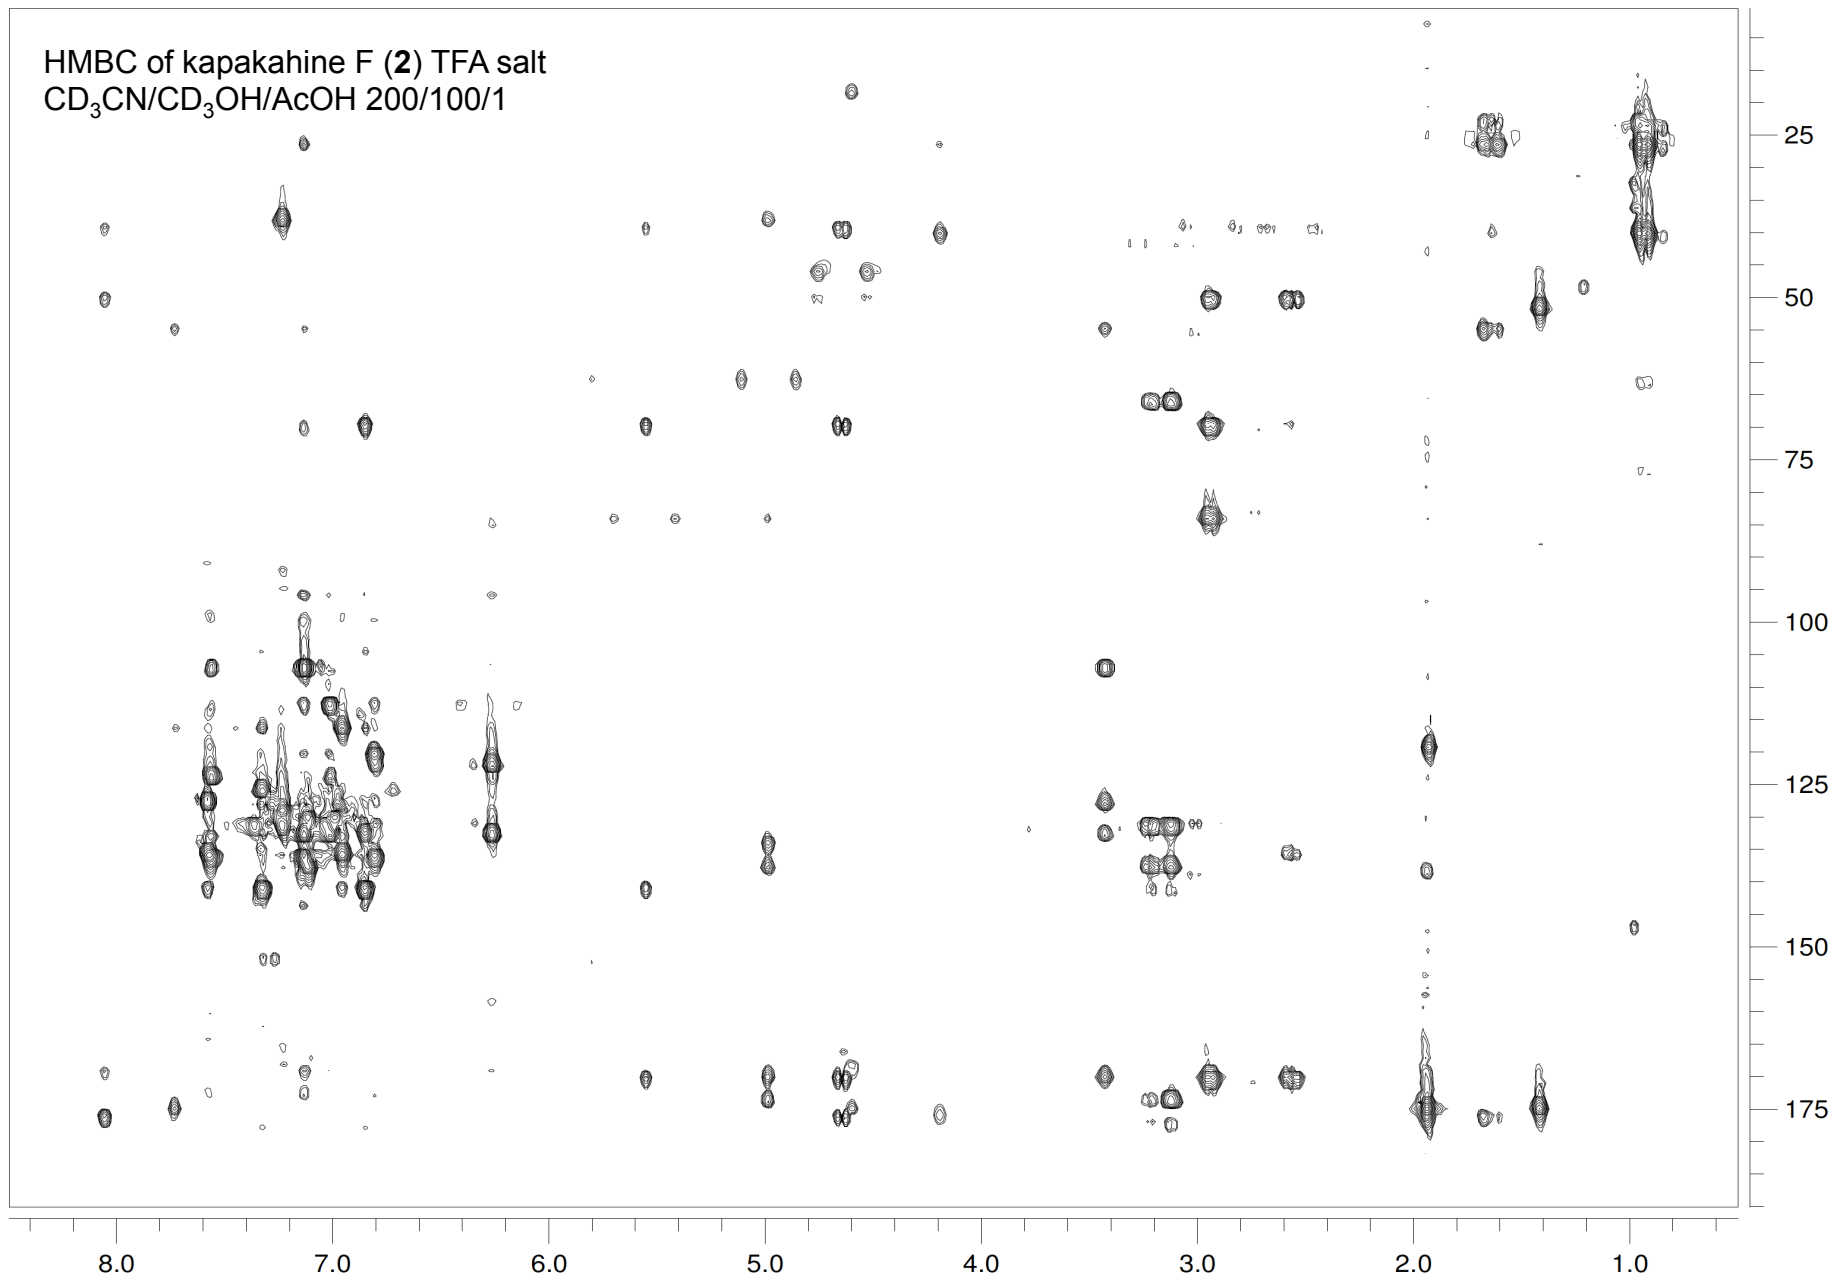

ROESY of kapakahine F (2) TFA salt  
CD<sub>3</sub>CN/CD<sub>3</sub>OH/AcOH 200/100/1

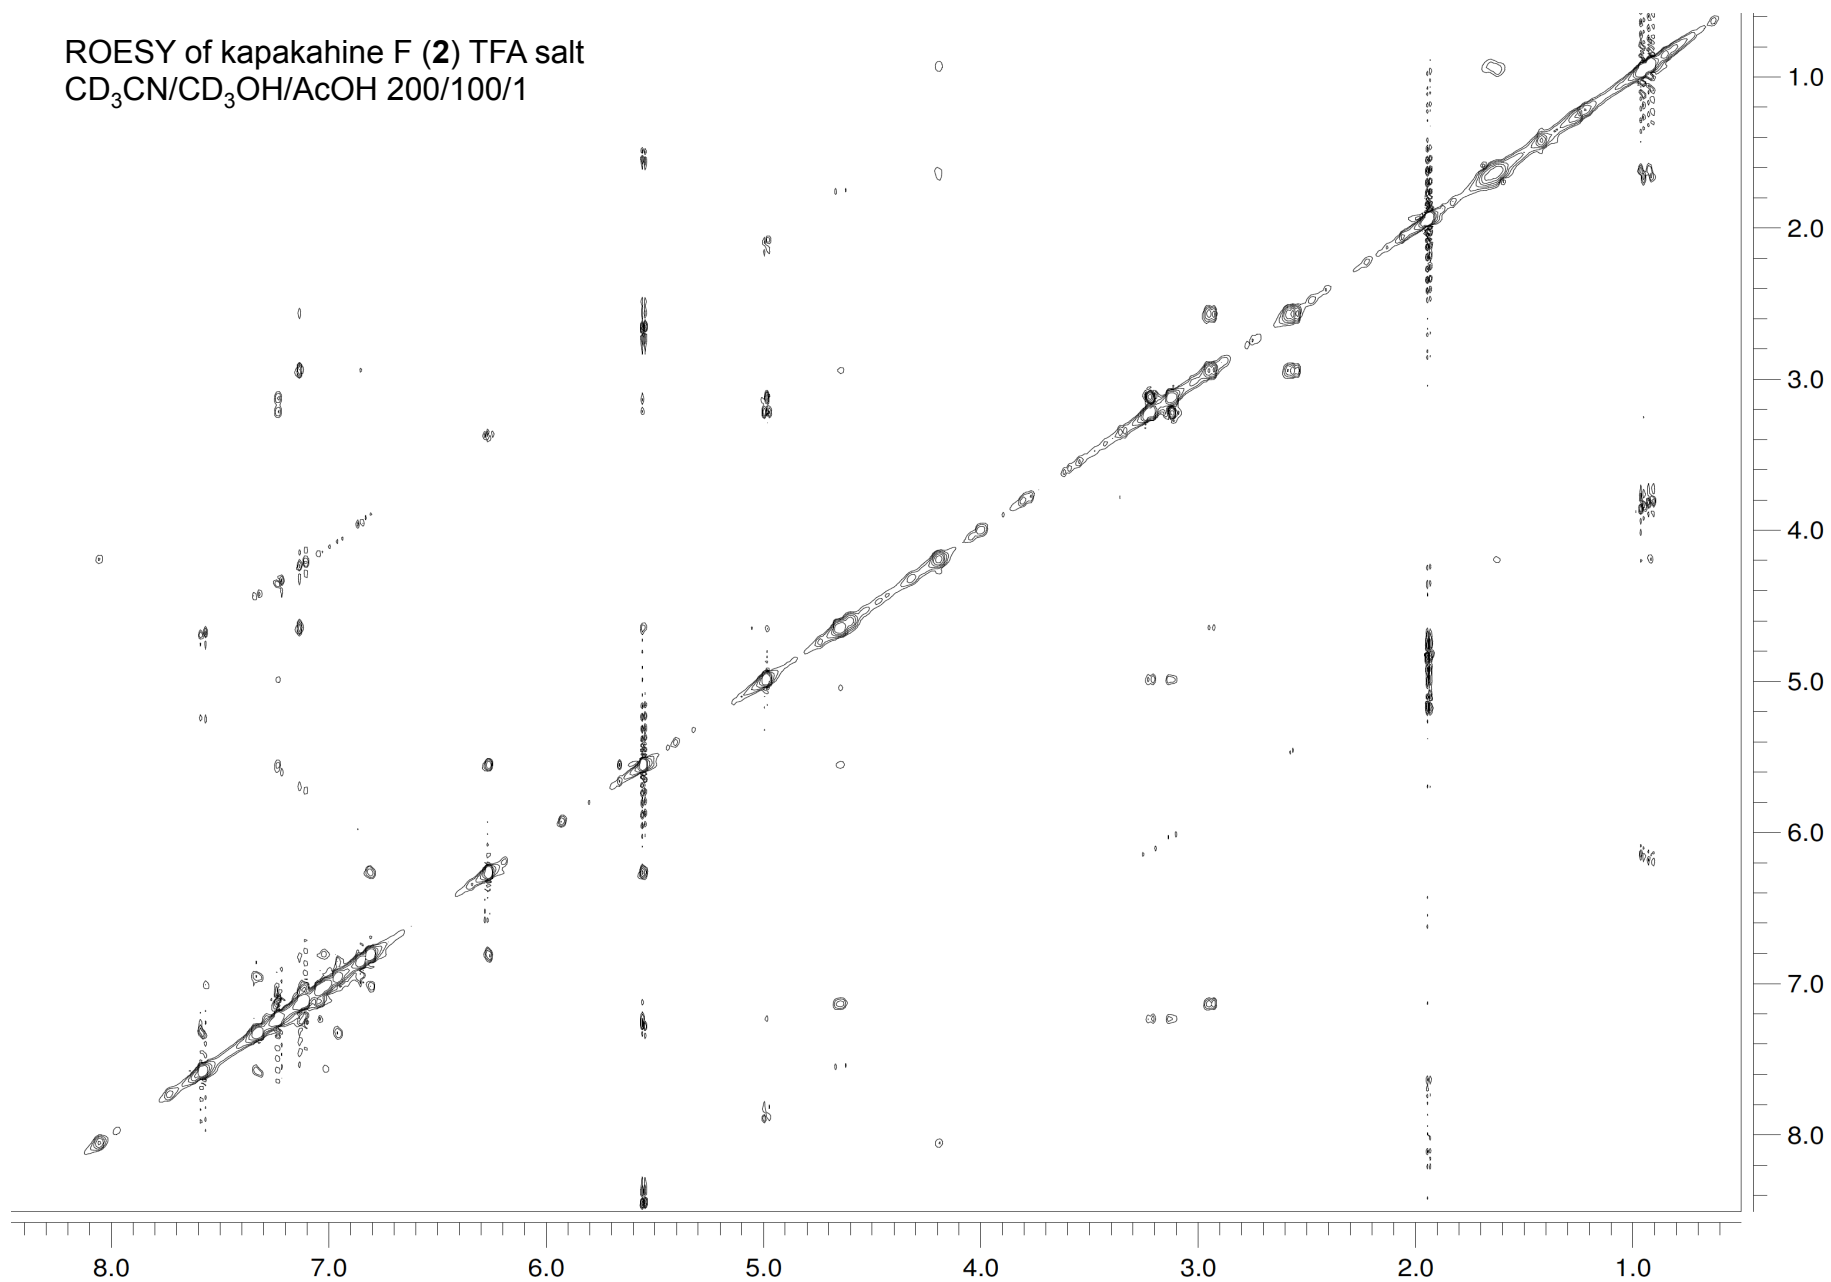

S-161

<sup>1</sup>H-NMR of kapakahine B (**3**) TFA salt  
CD<sub>3</sub>CN/CD<sub>3</sub>OH/AcOH 200/100/1

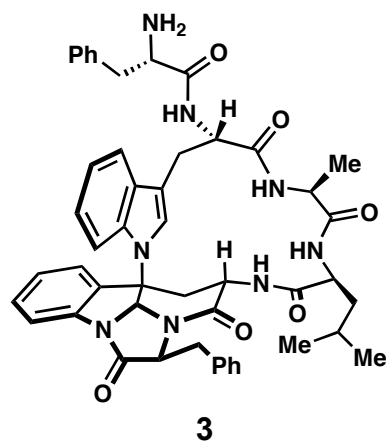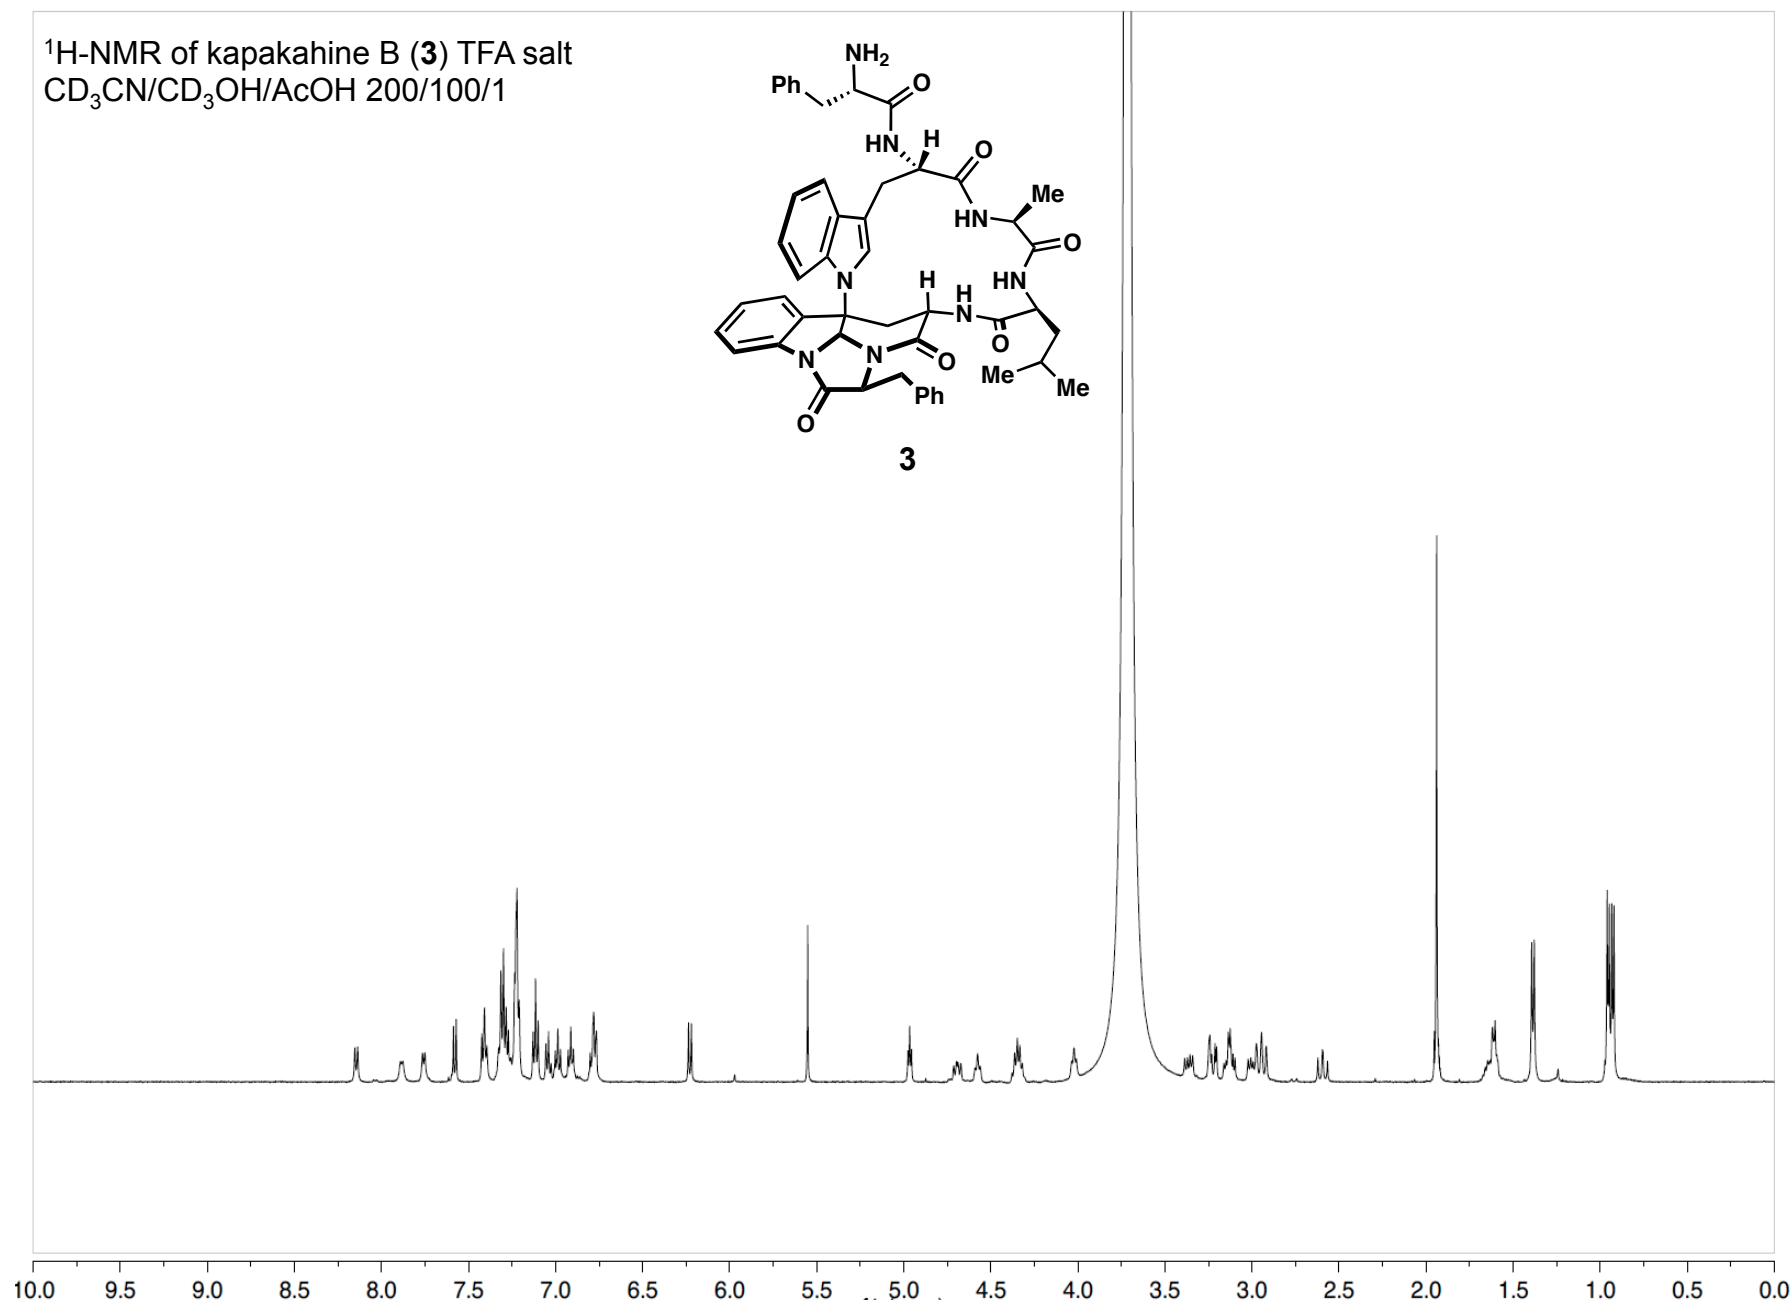

<sup>13</sup>C-NMR of kapakahine B (**3**) TFA salt  
CD<sub>3</sub>CN/CD<sub>3</sub>OH/AcOH 200/100/1

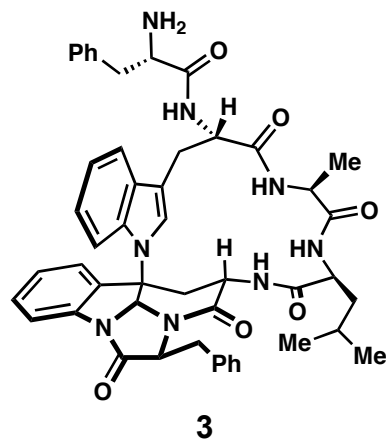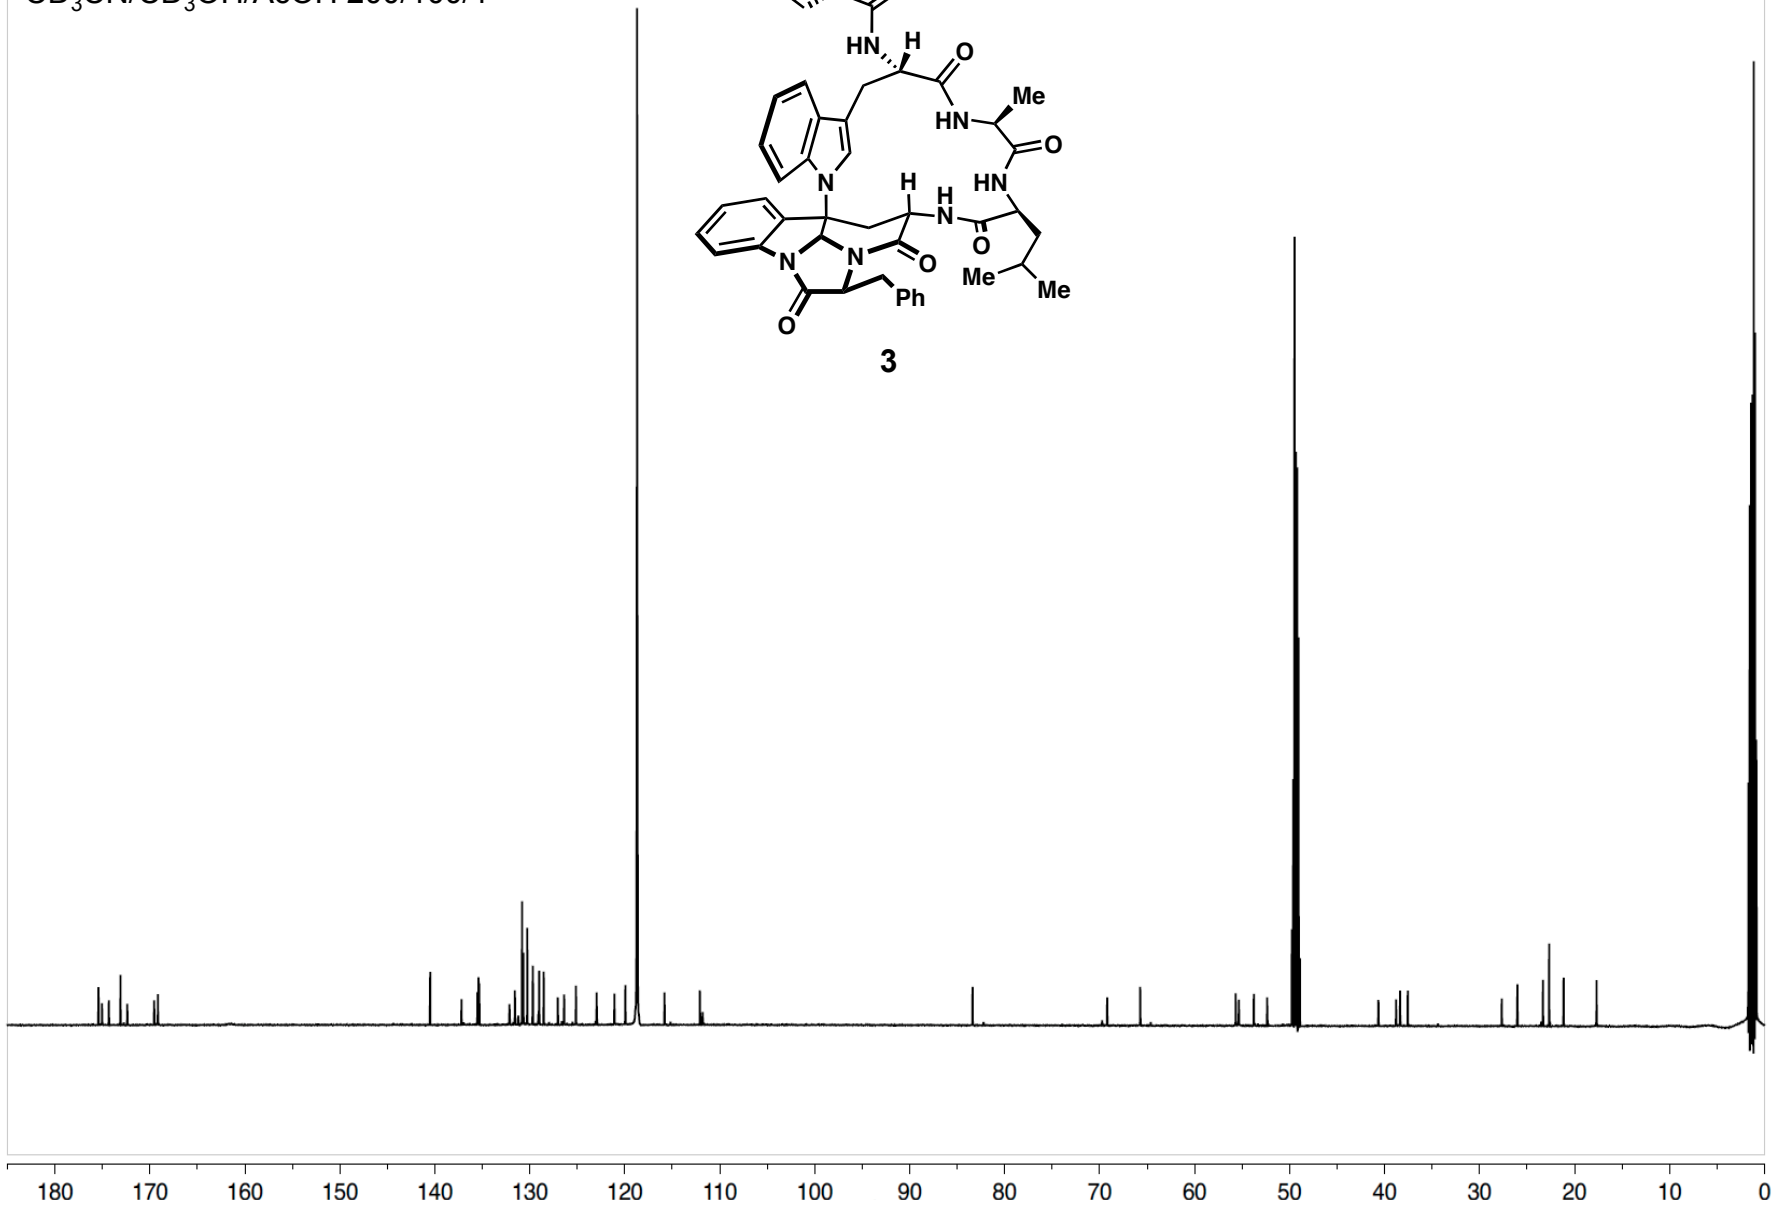

$^1\text{H-NMR}$  of synthetic kapakahine B (**3**) TFA salt  
 $\text{CD}_3\text{CN}/\text{CD}_3\text{OH}/\text{AcOH}$  200/100/1

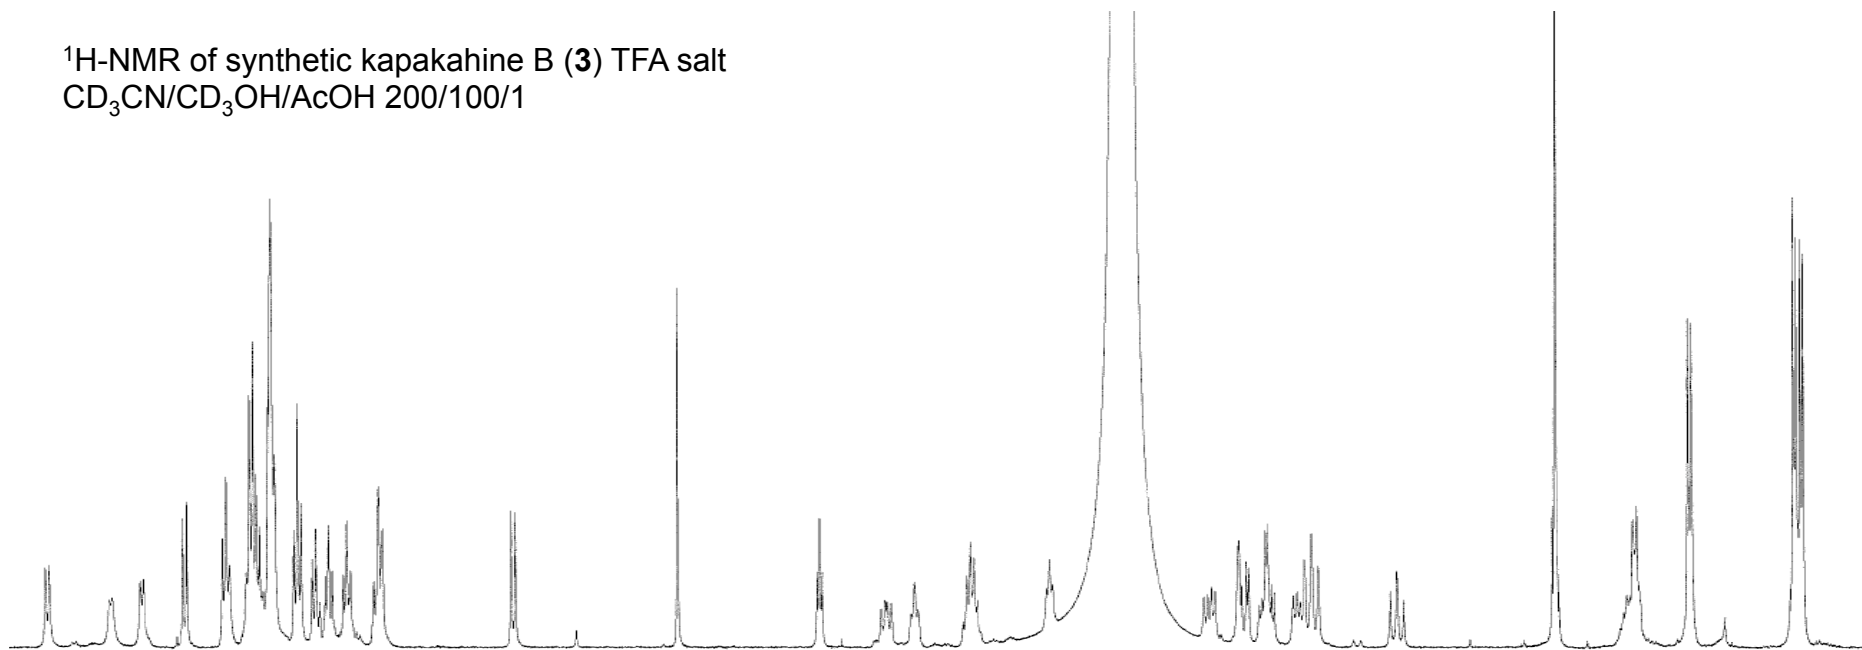

$^1\text{H-NMR}$  of natural kapakahine B (**3**) TFA salt  
 $\text{CD}_3\text{CN}/\text{CD}_3\text{OH}$  2/1 + AcOH  
Scheuer, *J. Am. Chem. Soc.* **1995**, *117*,  
8271-8272.

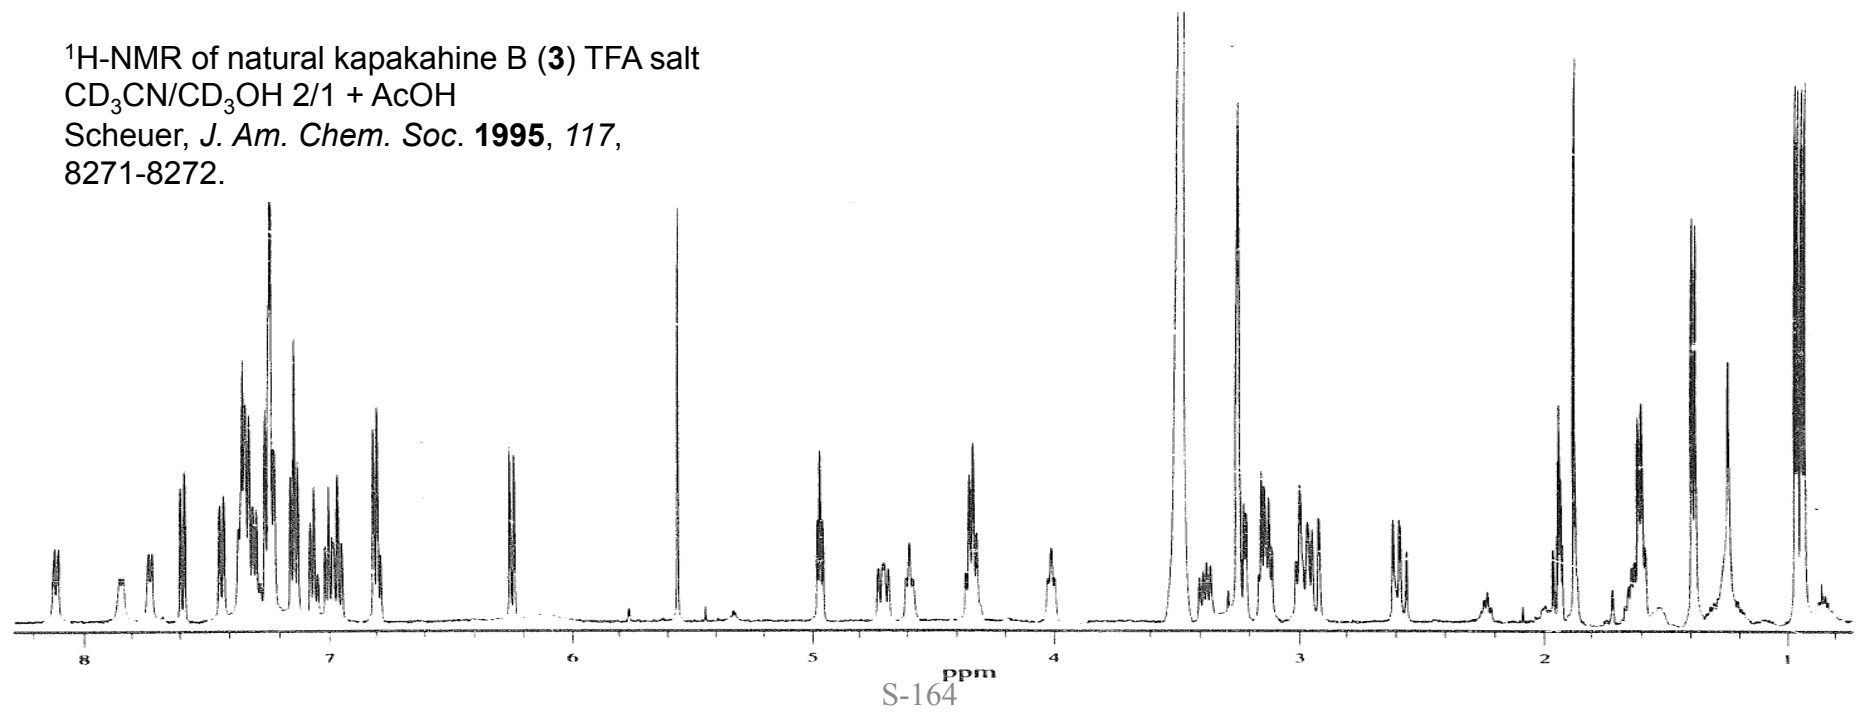

$^{13}\text{C}$ -NMR of synthetic kapakahine B (**3**) TFA salt  
 $\text{CD}_3\text{CN}/\text{CD}_3\text{OH}/\text{AcOH}$  200/100/1

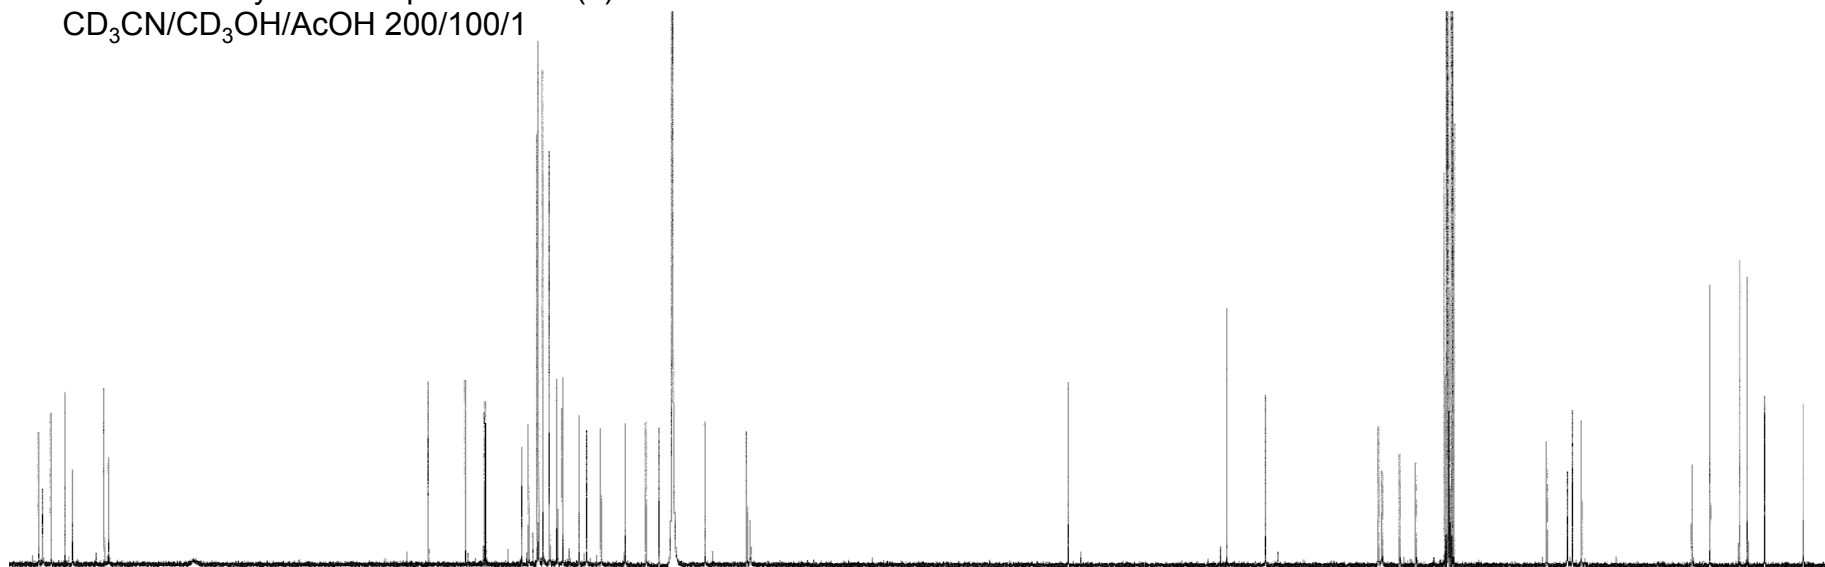

$^{13}\text{C}$ -NMR of natural kapakahine B (**3**) TFA salt  
 $\text{CD}_3\text{CN}/\text{CD}_3\text{OH}$  2/1 + AcOH  
Scheuer, *J. Am. Chem. Soc.* **1995**, *117*,  
8271-8272.

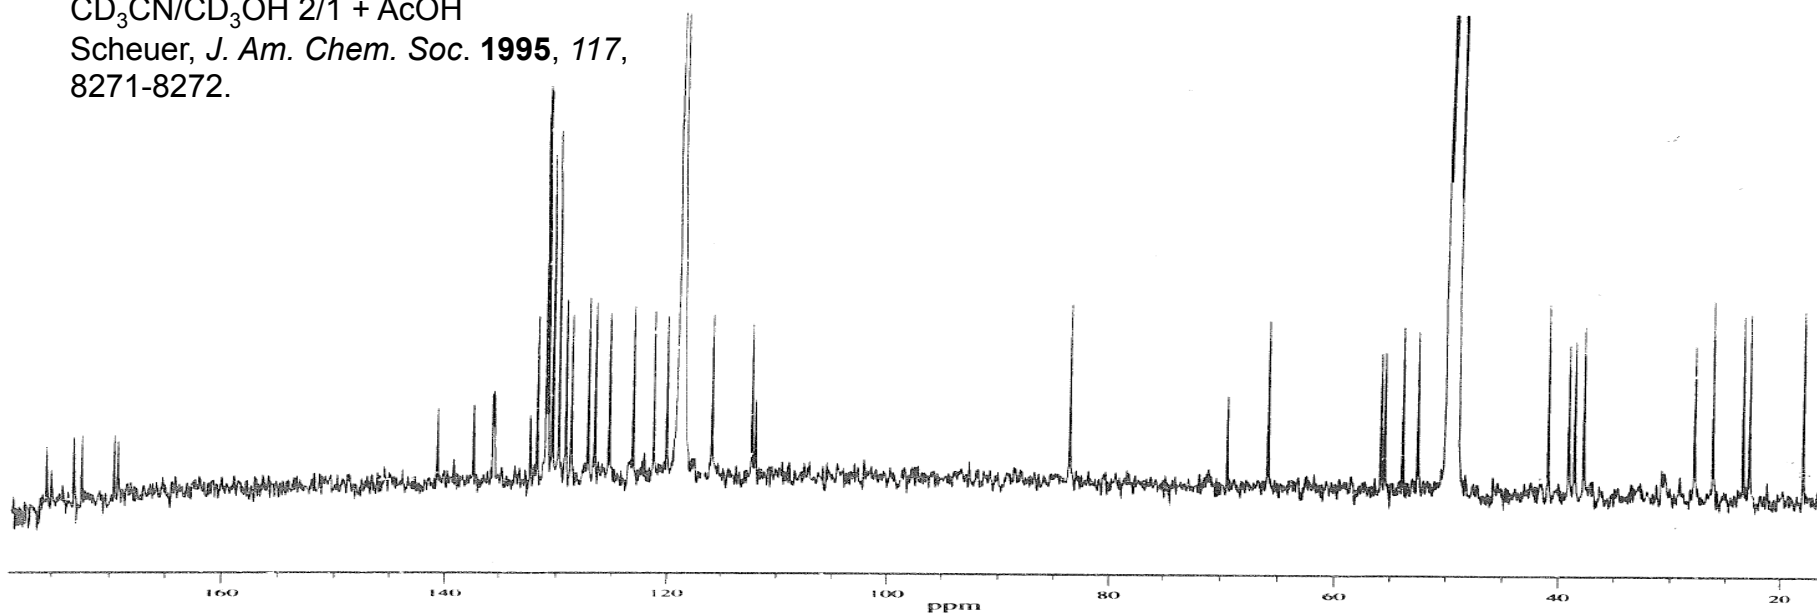

Supplement: NIHMS200699-supplement-3_si_003.pdf [file NIHMS200699-supplement-3_si_003.pdf]
