# Supplementary material
Source: PubMed Central journal article supplement (PMC2874090)
Supplement: NIHMS200699-supplement-2_si_002.pdf [file NIHMS200699-supplement-2_si_002.pdf]

# Psychotrimine (1) – 1 Dose

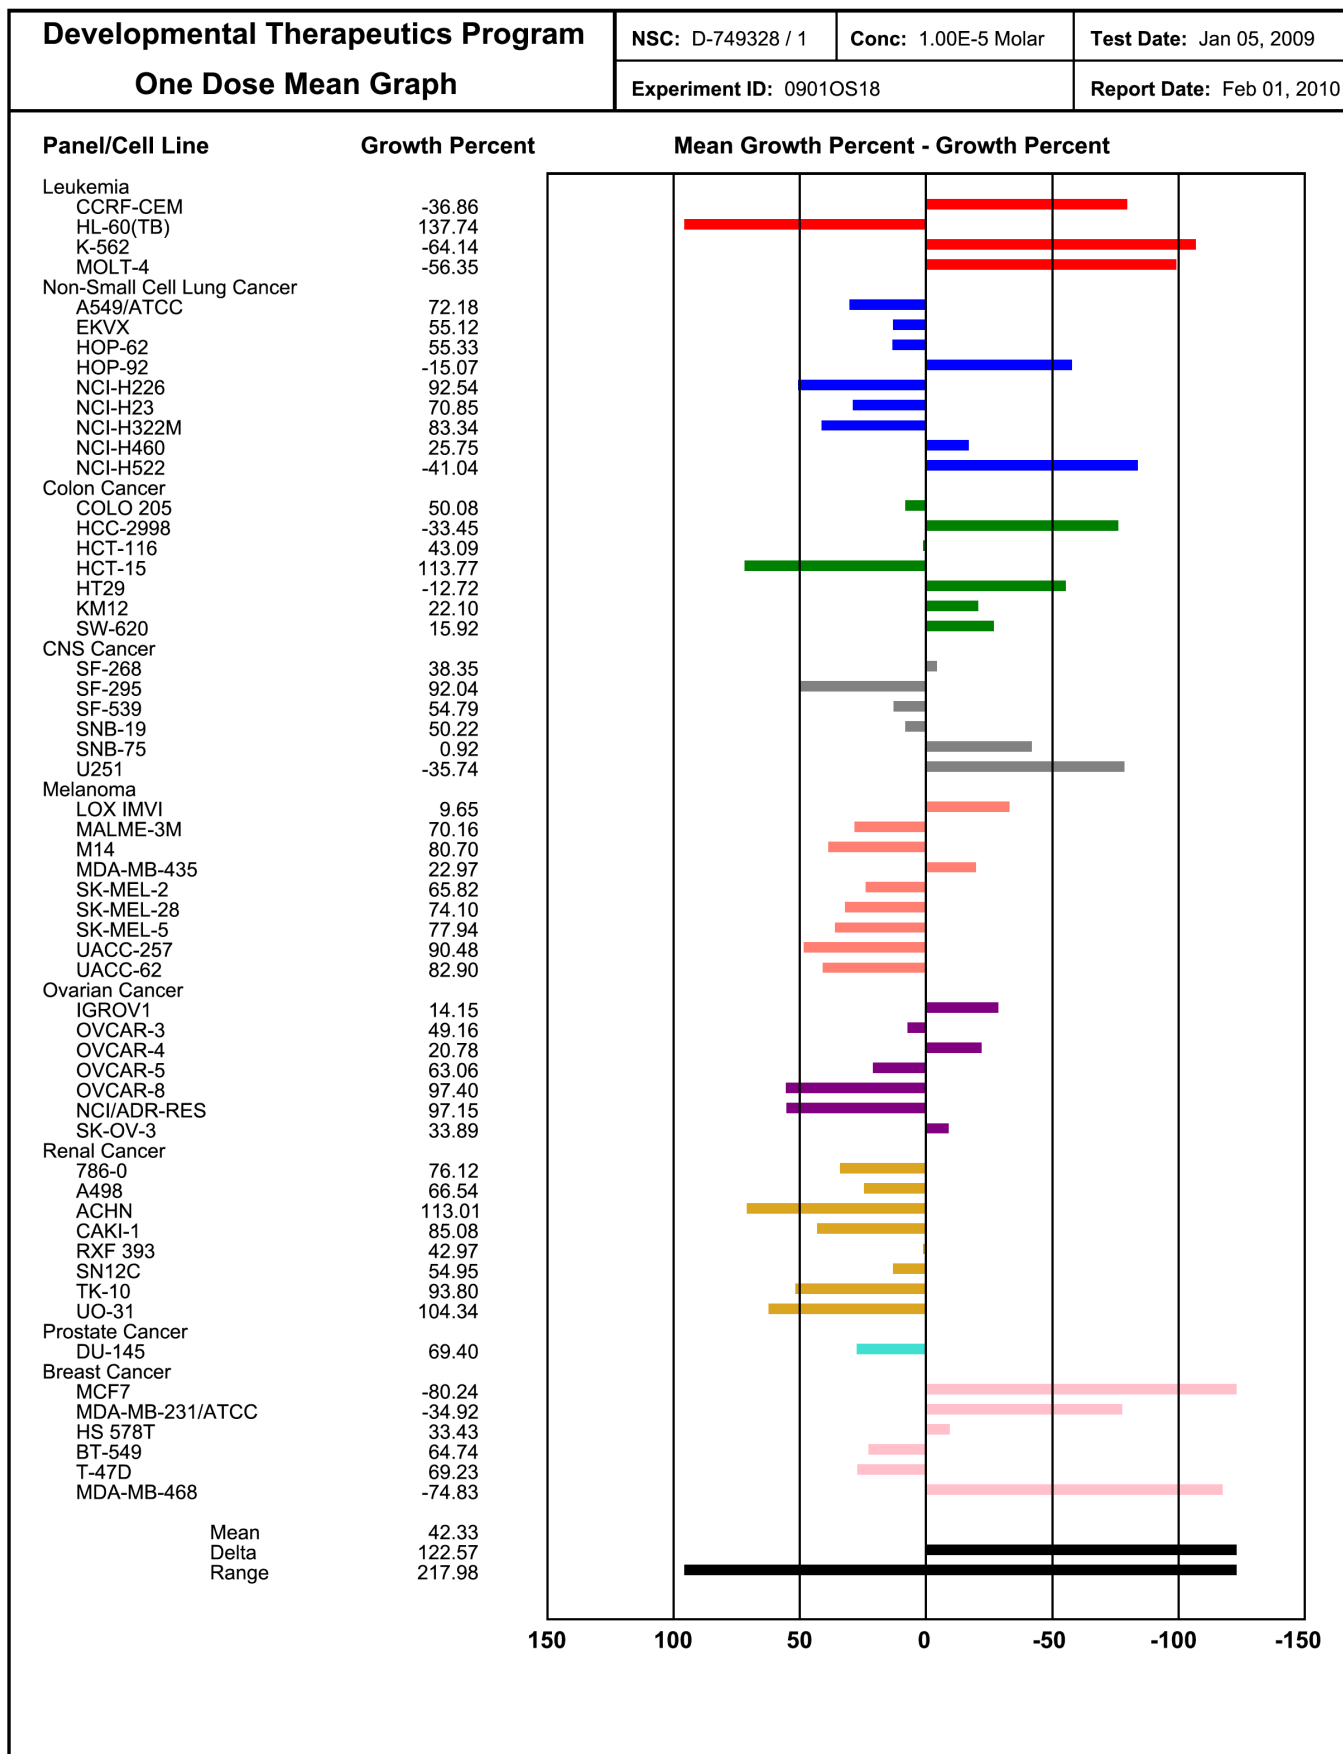

# Psychotrimine (1) – 5 Dose

## National Cancer Institute Developmental Therapeutics Program In-Vitro Testing Results

|                              |                                       |                |               |
|------------------------------|---------------------------------------|----------------|---------------|
| NSC : D - 749328 / 1         | Experiment ID : 0903NS12              | Test Type : 08 | Units : Molar |
| Report Date : April 17, 2009 | Test Date : March 23, 2009            | QNS :          | MC :          |
| COMI : psb-4 (82901)         | Stain Reagent : SRB Dual-Pass Related | SSPL : 0RCH    |               |

| Panel/Cell Line                   | Time<br>Zero | Mean Optical Densities |       |       |       |       |       | Percent Growth |      |      |      |      | GI50    | TGI       | LC50      |
|-----------------------------------|--------------|------------------------|-------|-------|-------|-------|-------|----------------|------|------|------|------|---------|-----------|-----------|
|                                   |              | Ctrl                   | -8.0  | -7.0  | -6.0  | -5.0  | -4.0  | -8.0           | -7.0 | -6.0 | -5.0 | -4.0 |         |           |           |
| <b>Leukemia</b>                   |              |                        |       |       |       |       |       |                |      |      |      |      |         |           |           |
| CCR5-CEM                          | 0.601        | 1.668                  | 1.572 | 1.634 | 1.617 | 0.261 | 0.161 | 91             | 97   | 95   | -57  | -73  | 1.99E-6 | 4.24E-6   | 9.04E-6   |
| HL-60(TB)                         | 0.632        | 1.294                  | 1.300 | 1.280 | 1.195 | 0.315 | 0.126 | 101            | 98   | 85   | -50  | -80  | 1.82E-6 | 4.26E-6   | 9.97E-6   |
| K-562                             | 0.178        | 0.944                  | 0.900 | 0.923 | 0.898 | 0.041 | 0.035 | 94             | 97   | 94   | -77  | -80  | 1.81E-6 | 3.54E-6   | 6.93E-6   |
| MOLT-4                            | 0.461        | 1.028                  | 1.016 | 1.017 | 1.017 | 0.126 | 0.084 | 98             | 98   | 98   | -73  | -82  | 1.91E-6 | 3.75E-6   | 7.37E-6   |
| RPMI-8226                         | 0.872        | 2.190                  | 2.231 | 2.075 | 2.118 | 1.422 | 0.321 | 103            | 91   | 95   | 42   | -63  | 6.96E-6 | 2.50E-5   | 7.48E-5   |
| SR                                | 0.274        | 0.658                  | 0.596 | 0.612 | 0.632 | 0.131 | 0.106 | 84             | 88   | 93   | -52  | -61  | 1.98E-6 | 4.37E-6   | 9.63E-6   |
| <b>Non-Small Cell Lung Cancer</b> |              |                        |       |       |       |       |       |                |      |      |      |      |         |           |           |
| A549/ATCC                         | 0.312        | 1.575                  | 1.617 | 1.573 | 1.630 | 0.737 | 0.132 | 103            | 100  | 104  | 34   | -58  | 5.86E-6 | 2.33E-5   | 8.21E-5   |
| EKVX                              | 0.611        | 1.437                  | 1.440 | 1.354 | 1.246 | 0.746 | 0.197 | 100            | 90   | 77   | 16   | -68  | 2.78E-6 | 1.56E-5   | 6.14E-5   |
| HOP-62                            | 0.585        | 1.540                  | 1.523 | 1.542 | 1.462 | 1.004 | 0.056 | 98             | 100  | 92   | 44   | -90  | 7.44E-6 | 2.12E-5   | 5.00E-5   |
| HOP-92                            | 0.585        | 1.021                  | 0.988 | 0.929 | 0.872 | 0.544 | 0.091 | 93             | 79   | 66   | -7   | -84  | 1.65E-6 | 7.99E-6   | 3.59E-5   |
| NCI-H226                          | 0.792        | 1.646                  | 1.655 | 1.666 | 1.603 | 0.928 | 0.172 | 101            | 102  | 95   | 16   | -78  | 3.71E-6 | 1.48E-5   | 5.00E-5   |
| NCI-H23                           | 0.813        | 2.482                  | 2.429 | 2.473 | 2.425 | 2.044 | 0.102 | 97             | 99   | 97   | 74   | -88  | 1.40E-5 | 2.87E-5   | 5.85E-5   |
| NCI-H322M                         | 0.648        | 1.390                  | 1.356 | 1.324 | 1.295 | 0.844 | 0.052 | 95             | 91   | 87   | 26   | -92  | 4.09E-6 | 1.67E-5   | 4.42E-5   |
| NCI-H460                          | 0.284        | 2.061                  | 2.156 | 2.120 | 2.104 | 0.132 | 0.033 | 105            | 103  | 102  | -54  | -89  | 2.17E-6 | 4.54E-6   | 9.49E-6   |
| NCI-H522                          | 0.643        | 1.660                  | 1.646 | 1.574 | 1.569 | 0.223 | 0.202 | 99             | 92   | 91   | -65  | -69  | 1.83E-6 | 3.82E-6   | 7.97E-6   |
| <b>Colon Cancer</b>               |              |                        |       |       |       |       |       |                |      |      |      |      |         |           |           |
| COLO 205                          | 0.334        | 1.154                  | 1.176 | 1.172 | 1.050 | 0.065 | 0.046 | 103            | 102  | 87   | -81  | -86  | 1.67E-6 | 3.31E-6   | 6.58E-6   |
| HCC-2998                          | 1.214        | 3.177                  | 3.215 | 3.203 | 3.149 | 2.623 | 0.136 | 102            | 101  | 99   | 72   | -89  | 1.37E-5 | 2.80E-5   | 5.73E-5   |
| HCT-116                           | 0.296        | 2.097                  | 2.116 | 2.117 | 2.014 | 0.238 | 0.017 | 101            | 101  | 95   | -20  | -94  | 2.48E-6 | 6.75E-6   | 2.55E-5   |
| HCT-15                            | 0.365        | 2.228                  | 2.199 | 2.326 | 2.186 | 2.002 | 0.059 | 98             | 105  | 98   | 88   | -84  | 1.66E-5 | 3.25E-5   | 6.34E-5   |
| HT29                              | 0.280        | 1.710                  | 1.698 | 1.626 | 1.442 | 0.043 | 0.019 | 99             | 94   | 81   | -85  | -93  | 1.54E-6 | 3.09E-6   | 6.18E-6   |
| KM12                              | 0.306        | 1.485                  | 1.496 | 1.551 | 1.421 | 0.035 | 0.027 | 101            | 106  | 95   | -89  | -91  | 1.75E-6 | 3.28E-6   | 6.16E-6   |
| SW-620                            | 0.288        | 1.941                  | 2.007 | 1.968 | 1.919 | 0.067 | 0.025 | 104            | 102  | 99   | -77  | -91  | 1.89E-6 | 3.65E-6   | 7.04E-6   |
| <b>CNS Cancer</b>                 |              |                        |       |       |       |       |       |                |      |      |      |      |         |           |           |
| SF-268                            | 0.414        | 1.289                  | 1.280 | 1.300 | 1.209 | 0.482 | 0.033 | 99             | 101  | 91   | 8    | -92  | 3.10E-6 | 1.19E-5   | 3.79E-5   |
| SF-295                            | 0.649        | 1.997                  | 1.830 | 1.698 | 1.695 | 0.294 | 0.127 | 88             | 78   | 78   | -55  | -80  | 1.62E-6 | 3.86E-6   | 9.21E-6   |
| SF-539                            | 0.492        | 1.555                  | 1.551 | 1.565 | 1.539 | 0.065 | 0.032 | 100            | 101  | 98   | -87  | -94  | 1.83E-6 | 3.40E-6   | 6.33E-6   |
| SNB-19                            | 0.680        | 1.576                  | 1.566 | 1.638 | 1.540 | 1.087 | 0.038 | 99             | 107  | 96   | 45   | -94  | 8.12E-6 | 2.11E-5   | 4.81E-5   |
| SNB-75                            | 0.522        | 1.099                  | 1.032 | 1.042 | 0.936 | 0.244 | 0.020 | 88             | 90   | 72   | -53  | -96  | 1.49E-6 | 3.74E-6   | 9.40E-6   |
| U251                              | 0.187        | 1.127                  | 1.108 | 1.148 | 1.028 | 0.053 | 0.039 | 98             | 102  | 89   | -72  | -79  | 1.76E-6 | 3.58E-6   | 7.31E-6   |
| <b>Melanoma</b>                   |              |                        |       |       |       |       |       |                |      |      |      |      |         |           |           |
| LOX IMVI                          | 0.324        | 2.044                  | 2.020 | 2.051 | 1.971 | 0.076 | 0.094 | 99             | 100  | 96   | -77  | -71  | 1.84E-6 | 3.59E-6   | 7.00E-6   |
| MALME-3M                          | 0.543        | 0.845                  | 0.818 | 0.802 | 0.802 | 0.248 | 0.131 | 91             | 86   | 86   | -54  | -76  | 1.80E-6 | 4.09E-6   | 9.31E-6   |
| M14                               | 0.292        | 1.100                  | 1.043 | 1.086 | 1.060 | 0.018 | 0.024 | 93             | 98   | 95   | -94  | -92  | 1.73E-6 | 3.18E-6   | 5.85E-6   |
| MDA-MB-435                        | 0.504        | 2.020                  | 1.777 | 1.742 | 1.655 | 0.112 | 0.097 | 84             | 82   | 76   | -78  | -81  | 1.47E-6 | 3.12E-6   | 6.59E-6   |
| SK-MEL-2                          | 0.679        | 1.479                  | 1.588 | 1.589 | 1.545 | 0.305 | 0.178 | 114            | 114  | 108  | -55  | -74  | 2.27E-6 | 4.60E-6   | 9.31E-6   |
| SK-MEL-28                         | 0.745        | 2.293                  | 2.307 | 2.264 | 2.277 | 2.133 | 0.025 | 101            | 98   | 99   | 90   | -97  | 1.63E-5 | 3.03E-5   | 5.62E-5   |
| SK-MEL-5                          | 0.527        | 1.797                  | 1.797 | 1.822 | 1.695 | 0.430 | 0.005 | 100            | 102  | 92   | -18  | -99  | 2.40E-6 | 6.81E-6   | 2.46E-5   |
| UACC-257                          | 0.810        | 1.609                  | 1.617 | 1.631 | 1.619 | 1.127 | 0.167 | 101            | 103  | 101  | 40   | -79  | 6.78E-6 | 2.15E-5   | 5.66E-5   |
| UACC-62                           | 0.603        | 2.302                  | 2.194 | 2.214 | 2.159 | 1.677 | 0.062 | 94             | 95   | 92   | 63   | -90  | 1.22E-5 | 2.59E-5   | 5.50E-5   |
| <b>Ovarian Cancer</b>             |              |                        |       |       |       |       |       |                |      |      |      |      |         |           |           |
| IGROV1                            | 0.316        | 0.924                  | 1.006 | 1.027 | 0.964 | 0.352 | 0.093 | 113            | 117  | 107  | 6    | -71  | 3.64E-6 | 1.19E-5   | 5.38E-5   |
| OVCAR-3                           | 0.458        | 1.241                  | 1.291 | 1.262 | 1.202 | 0.649 | 0.034 | 106            | 103  | 95   | 24   | -93  | 4.33E-6 | 1.61E-5   | 4.32E-5   |
| OVCAR-4                           | 0.421        | 1.247                  | 1.249 | 1.207 | 1.158 | 0.513 | 0.014 | 100            | 95   | 89   | 11   | -97  | 3.18E-6 | 1.27E-5   | 3.69E-5   |
| OVCAR-5                           | 0.469        | 1.077                  | 1.070 | 1.071 | 1.030 | 0.730 | 0.051 | 99             | 99   | 92   | 43   | -89  | 7.18E-6 | 2.11E-5   | 5.05E-5   |
| OVCAR-8                           | 0.245        | 1.136                  | 1.145 | 1.209 | 1.197 | 0.568 | 0.137 | 101            | 108  | 107  | 36   | -44  | 6.38E-6 | 2.82E-5   | > 1.00E-4 |
| NCI/ADR-RES                       | 0.901        | 2.439                  | 2.549 | 2.595 | 2.542 | 2.550 | 1.084 | 107            | 110  | 107  | 107  | 12   | 3.98E-5 | > 1.00E-4 | > 1.00E-4 |
| SK-OV-3                           | 0.565        | 1.182                  | 1.198 | 1.236 | 1.191 | 0.468 | 0.030 | 103            | 109  | 101  | -17  | -95  | 2.71E-6 | 7.16E-6   | 2.64E-5   |
| <b>Renal Cancer</b>               |              |                        |       |       |       |       |       |                |      |      |      |      |         |           |           |
| 786-0                             | 0.479        | 1.891                  | 1.905 | 1.836 | 1.817 | 1.034 | 0.043 | 101            | 96   | 95   | 39   | -91  | 6.40E-6 | 2.00E-5   | 4.84E-5   |
| A498                              | 1.206        | 1.922                  | 1.911 | 1.913 | 1.901 | 1.672 | 0.179 | 98             | 99   | 97   | 65   | -85  | 1.26E-5 | 2.71E-5   | 5.83E-5   |
| ACHN                              | 0.261        | 1.153                  | 1.229 | 1.232 | 1.253 | 1.073 | 0.043 | 108            | 109  | 111  | 91   | -84  | 1.72E-5 | 3.32E-5   | 6.43E-5   |
| CAKI-1                            | 1.047        | 1.889                  | 1.872 | 1.824 | 1.789 | 1.490 | 0.085 | 98             | 92   | 88   | 53   | -92  | 1.04E-5 | 2.31E-5   | 5.13E-5   |
| RXF 393                           | 0.605        | 1.073                  | 1.103 | 1.093 | 1.043 | 0.535 | 0.203 | 107            | 104  | 94   | -12  | -67  | 2.60E-6 | 7.75E-6   | 5.00E-5   |
| SN12C                             | 0.420        | 1.651                  | 1.568 | 1.669 | 1.569 | 0.931 | 0.082 | 93             | 101  | 93   | 41   | -80  | 6.85E-6 | 2.19E-5   | 5.62E-5   |
| TK-10                             | 0.772        | 1.371                  | 1.308 | 1.283 | 1.295 | 1.165 | 0.096 | 90             | 85   | 87   | 66   | -88  | 1.27E-5 | 2.68E-5   | 5.69E-5   |
| UO-31                             | 0.130        | 0.701                  | 0.686 | 0.645 | 0.659 | 0.462 | 0.069 | 97             | 90   | 93   | 58   | -47  | 1.20E-5 | 3.56E-5   | > 1.00E-4 |
| <b>Prostate Cancer</b>            |              |                        |       |       |       |       |       |                |      |      |      |      |         |           |           |
| DU-145                            | 0.344        | 1.331                  | 1.408 | 1.389 | 1.341 | 0.943 | 0.025 | 108            | 106  | 101  | 61   | -93  | 1.17E-5 | 2.48E-5   | 5.26E-5   |
| <b>Breast Cancer</b>              |              |                        |       |       |       |       |       |                |      |      |      |      |         |           |           |
| MCF7                              | 0.248        | 1.194                  | 1.174 | 1.228 | 1.169 | 0.034 | 0.045 | 98             | 104  | 97   | -86  | -82  | 1.81E-6 | 3.38E-6   | 6.33E-6   |
| MDA-MB-231/ATCC                   | 0.396        | 1.034                  | 1.063 | 1.092 | 0.945 | 0.087 | 0.038 | 105            | 109  | 86   | -78  | -91  | 1.66E-6 | 3.34E-6   | 6.74E-6   |
| HS 578T                           | 0.678        | 1.501                  | 1.529 | 1.518 | 1.436 | 0.793 | 0.301 | 103            | 102  | 92   | 14   | -56  | 3.46E-6 | 1.58E-5   | 8.29E-5   |
| BT-549                            | 1.119        | 1.532                  | 1.529 | 1.448 | 1.361 | 0.948 | 0.160 | 99             | 79   | 59   | -15  | -86  | 1.31E-6 | 6.21E-6   | 3.11E-5   |
| T-47D                             | 0.436        | 1.001                  | 0.976 | 1.007 | 0.944 | 0.386 | 0.088 | 96             | 101  | 90   | -11  | -80  | 2.47E-6 | 7.71E-6   | 3.66E-5   |
| MDA-MB-468                        | 0.447        | 1.018                  | 0.982 | 0.948 | 0.820 | 0.060 | 0.041 | 94             | 88   | 65   | -87  | -91  | 1.26E-6 | 2.69E-6   | 5.74E-6   |

# Psychotrimine (1) – 5 Dose

## National Cancer Institute Developmental Therapeutics Program Dose Response Curves

NSC: D - 749328 / 1

Report Date: April 17, 2009

SSPL: ORCH

Test Date: March 23, 2009

EXP. ID: 0903NS12

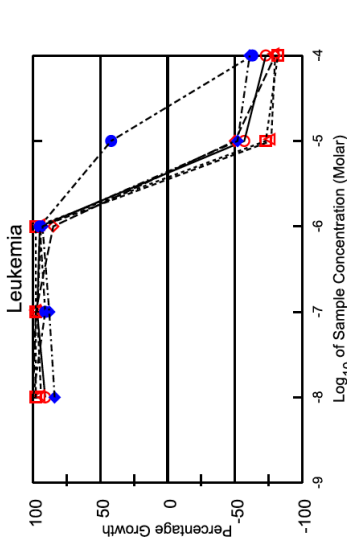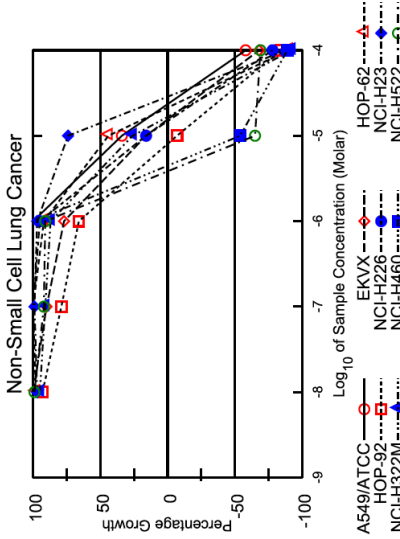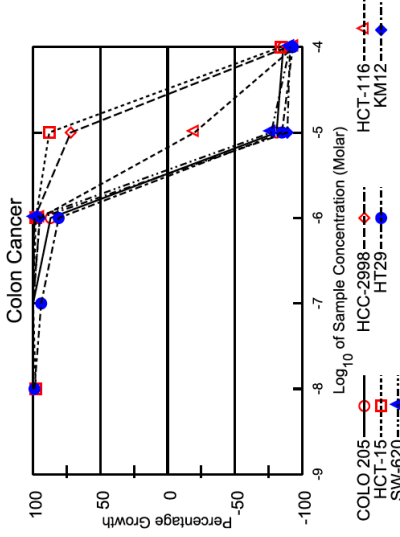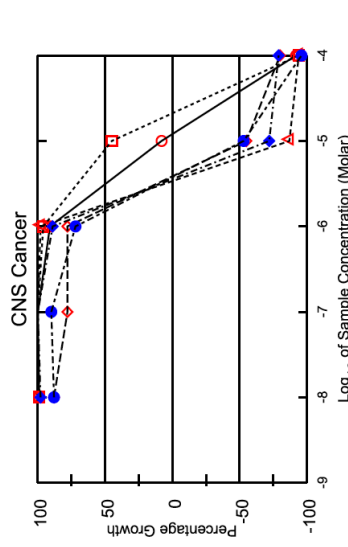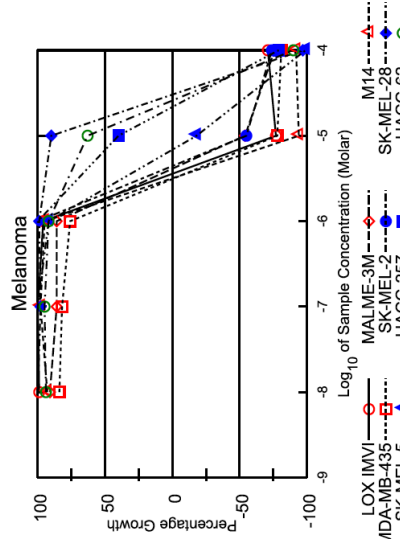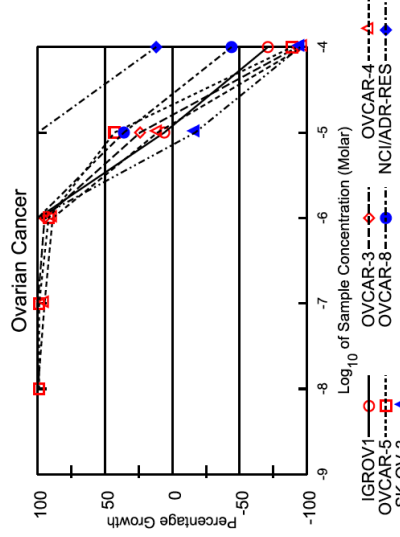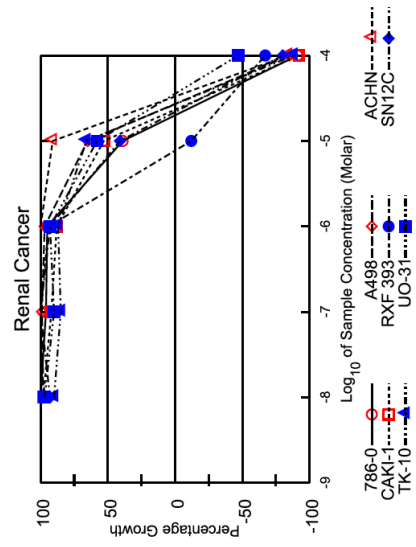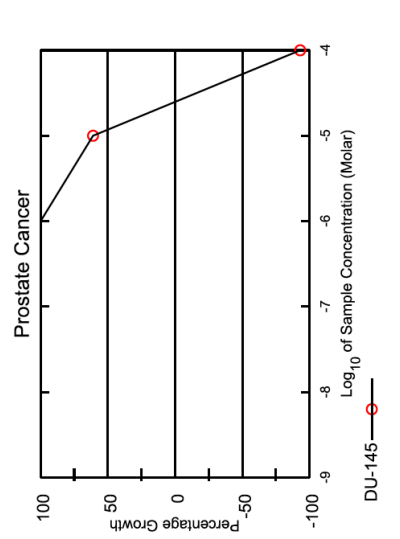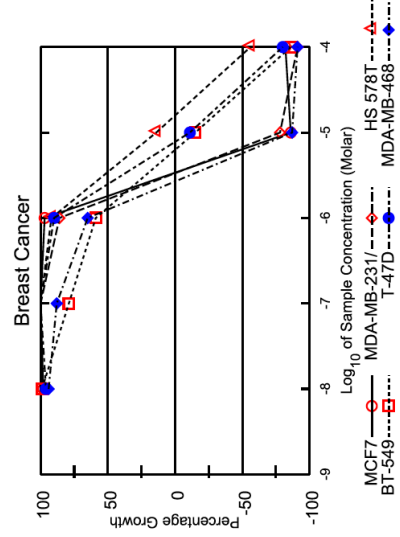

# Psychotrimine (1) – 5 Dose

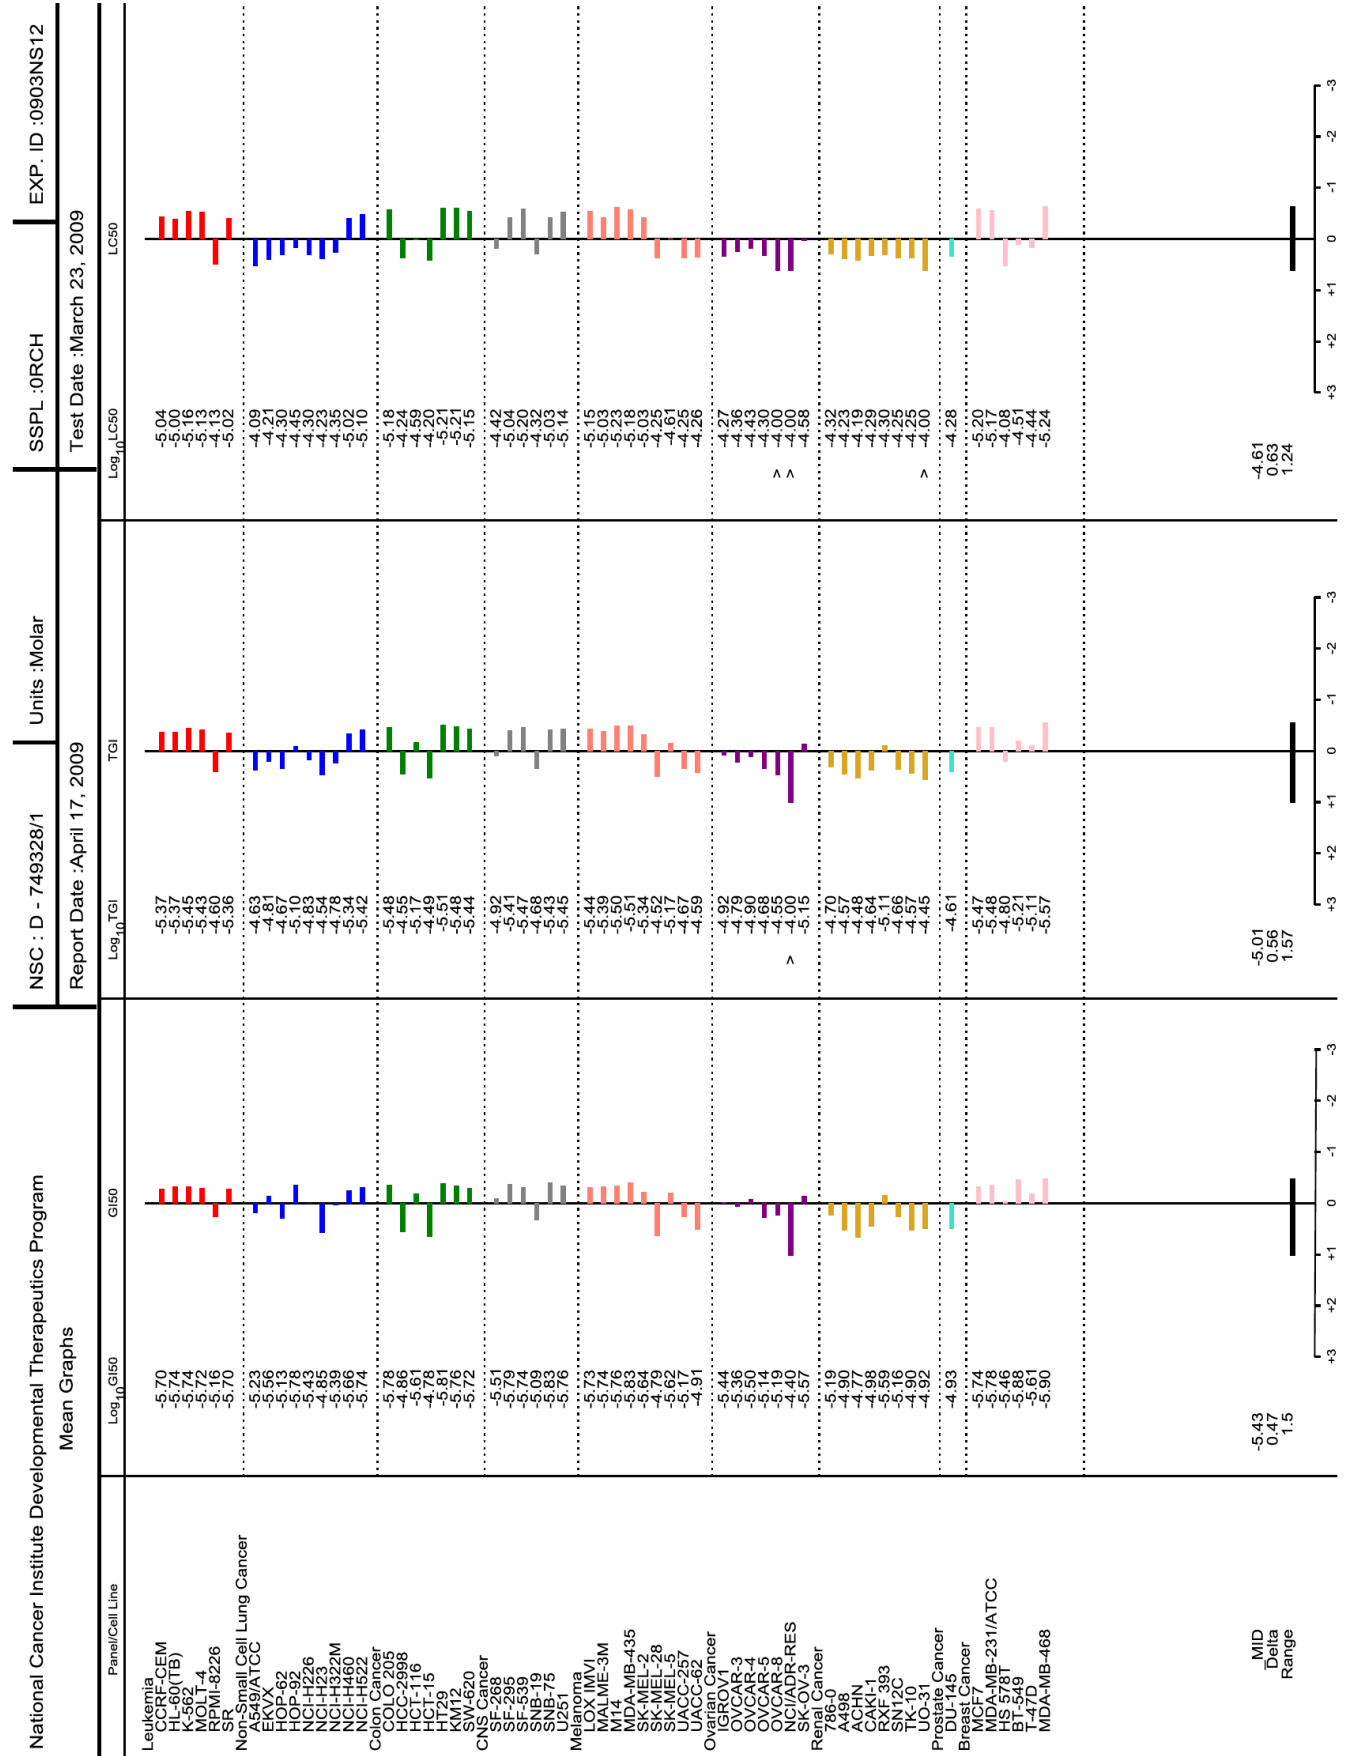

# Psychotrimine (1) – 5 Dose

|                                                                                      |                             |                           |                  |
|--------------------------------------------------------------------------------------|-----------------------------|---------------------------|------------------|
| National Cancer Institute Developmental Therapeutics Program<br>Dose Response Curves | NSC : D - 749328/1          | SSPL:ORCH                 | EXP. ID:0903NS12 |
|                                                                                      | Report Date: April 17, 2009 | Test Date: March 23, 2009 |                  |

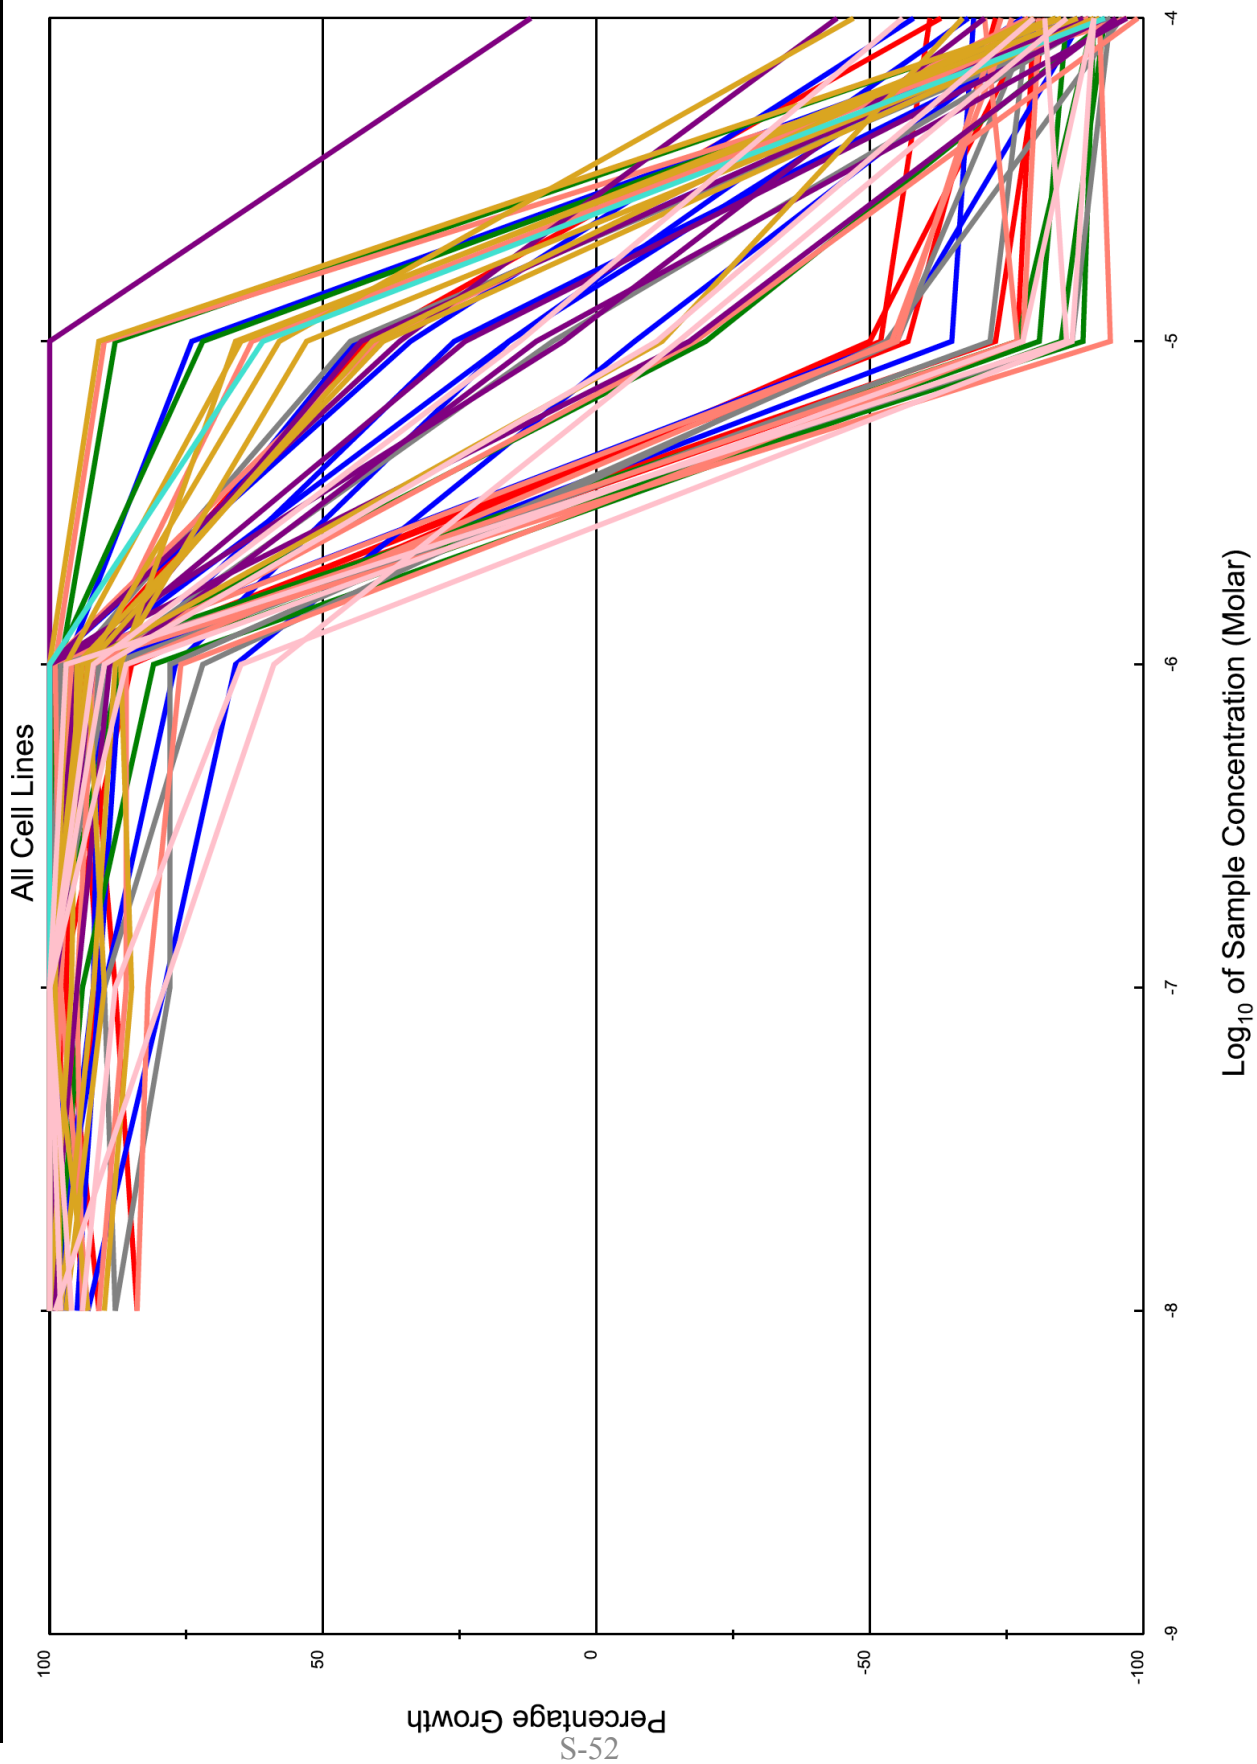

# Psychotrimine (1) – 5 Dose

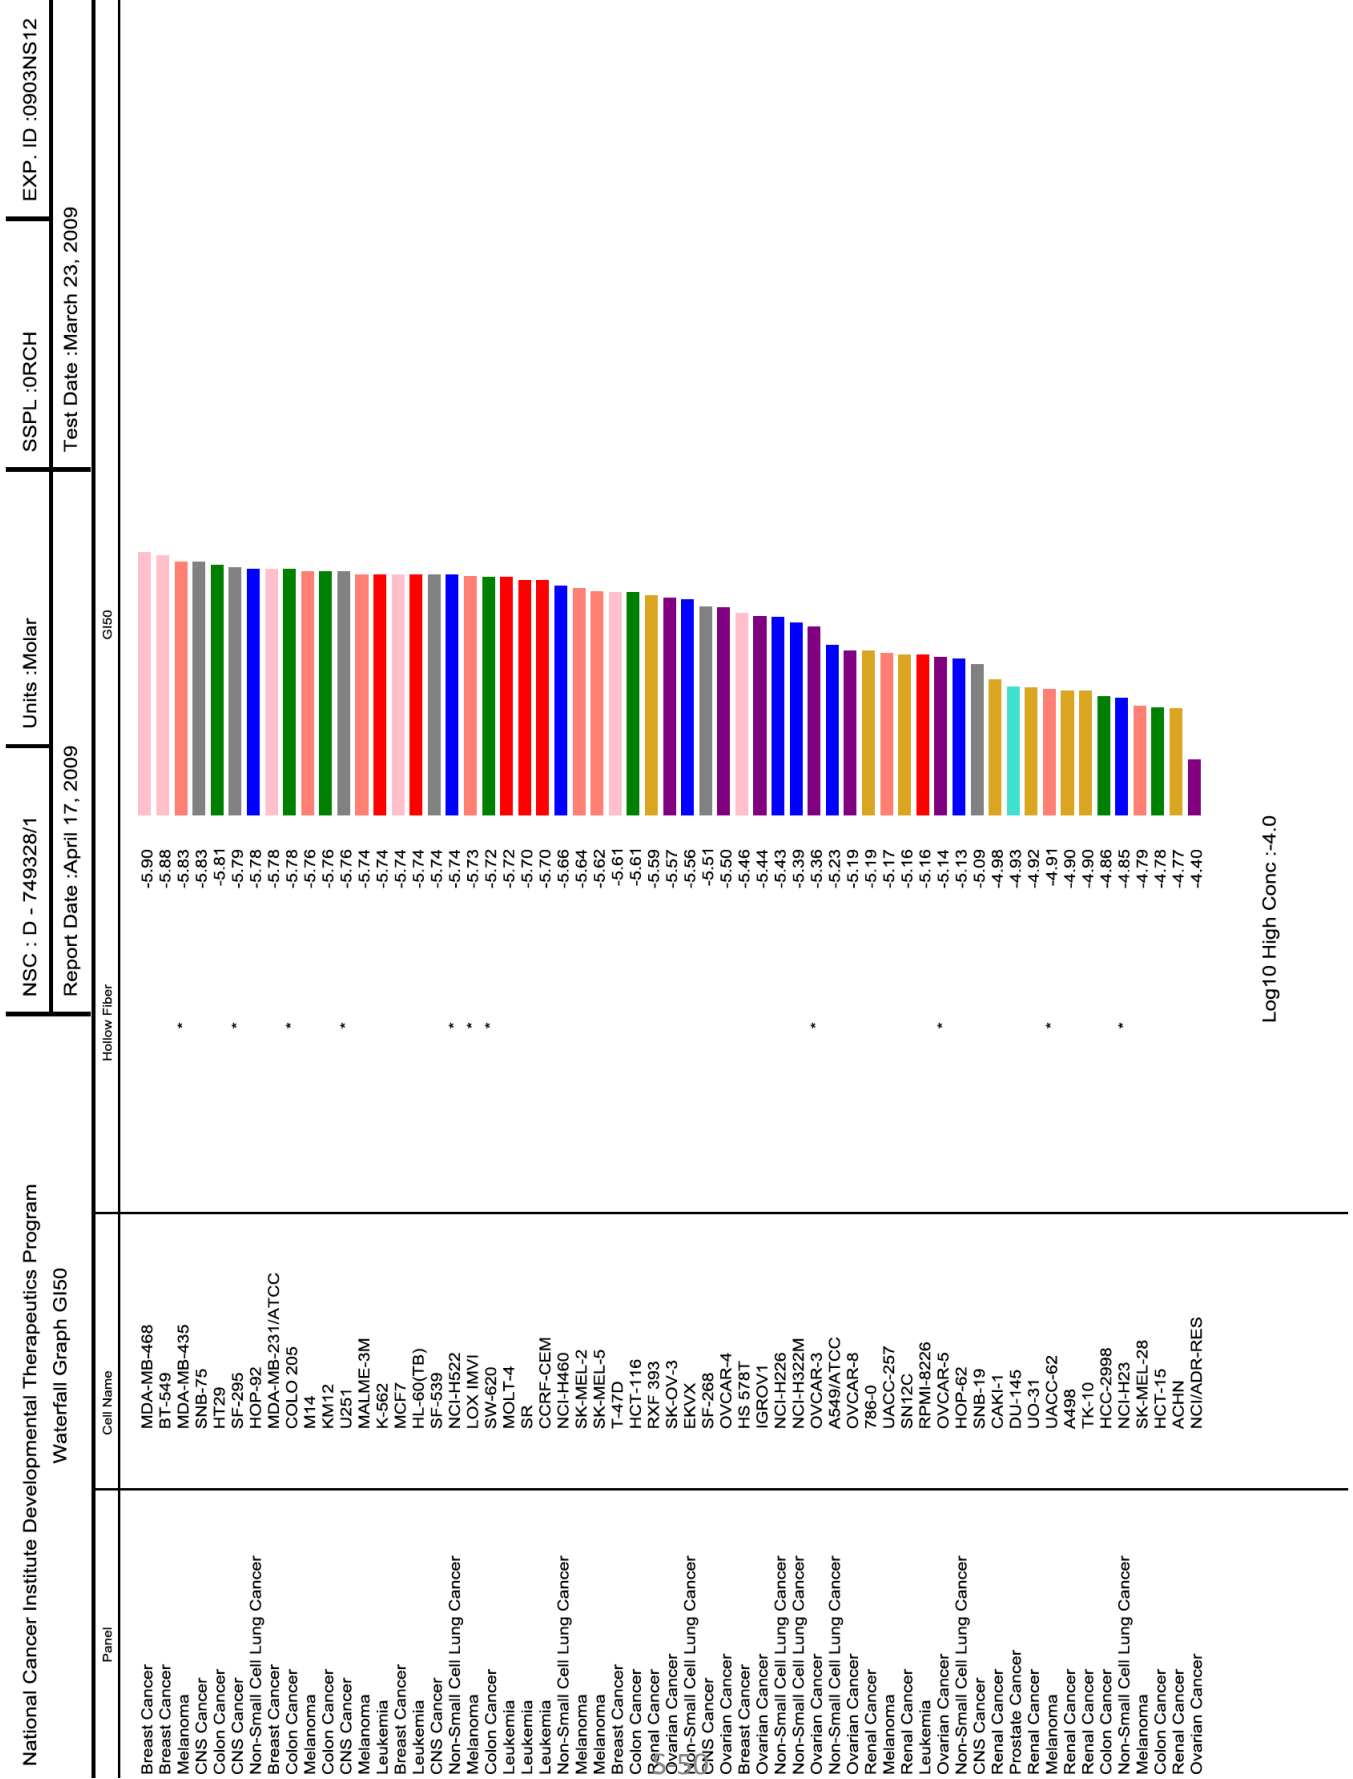

# Psychotrimine (1) – 5 Dose

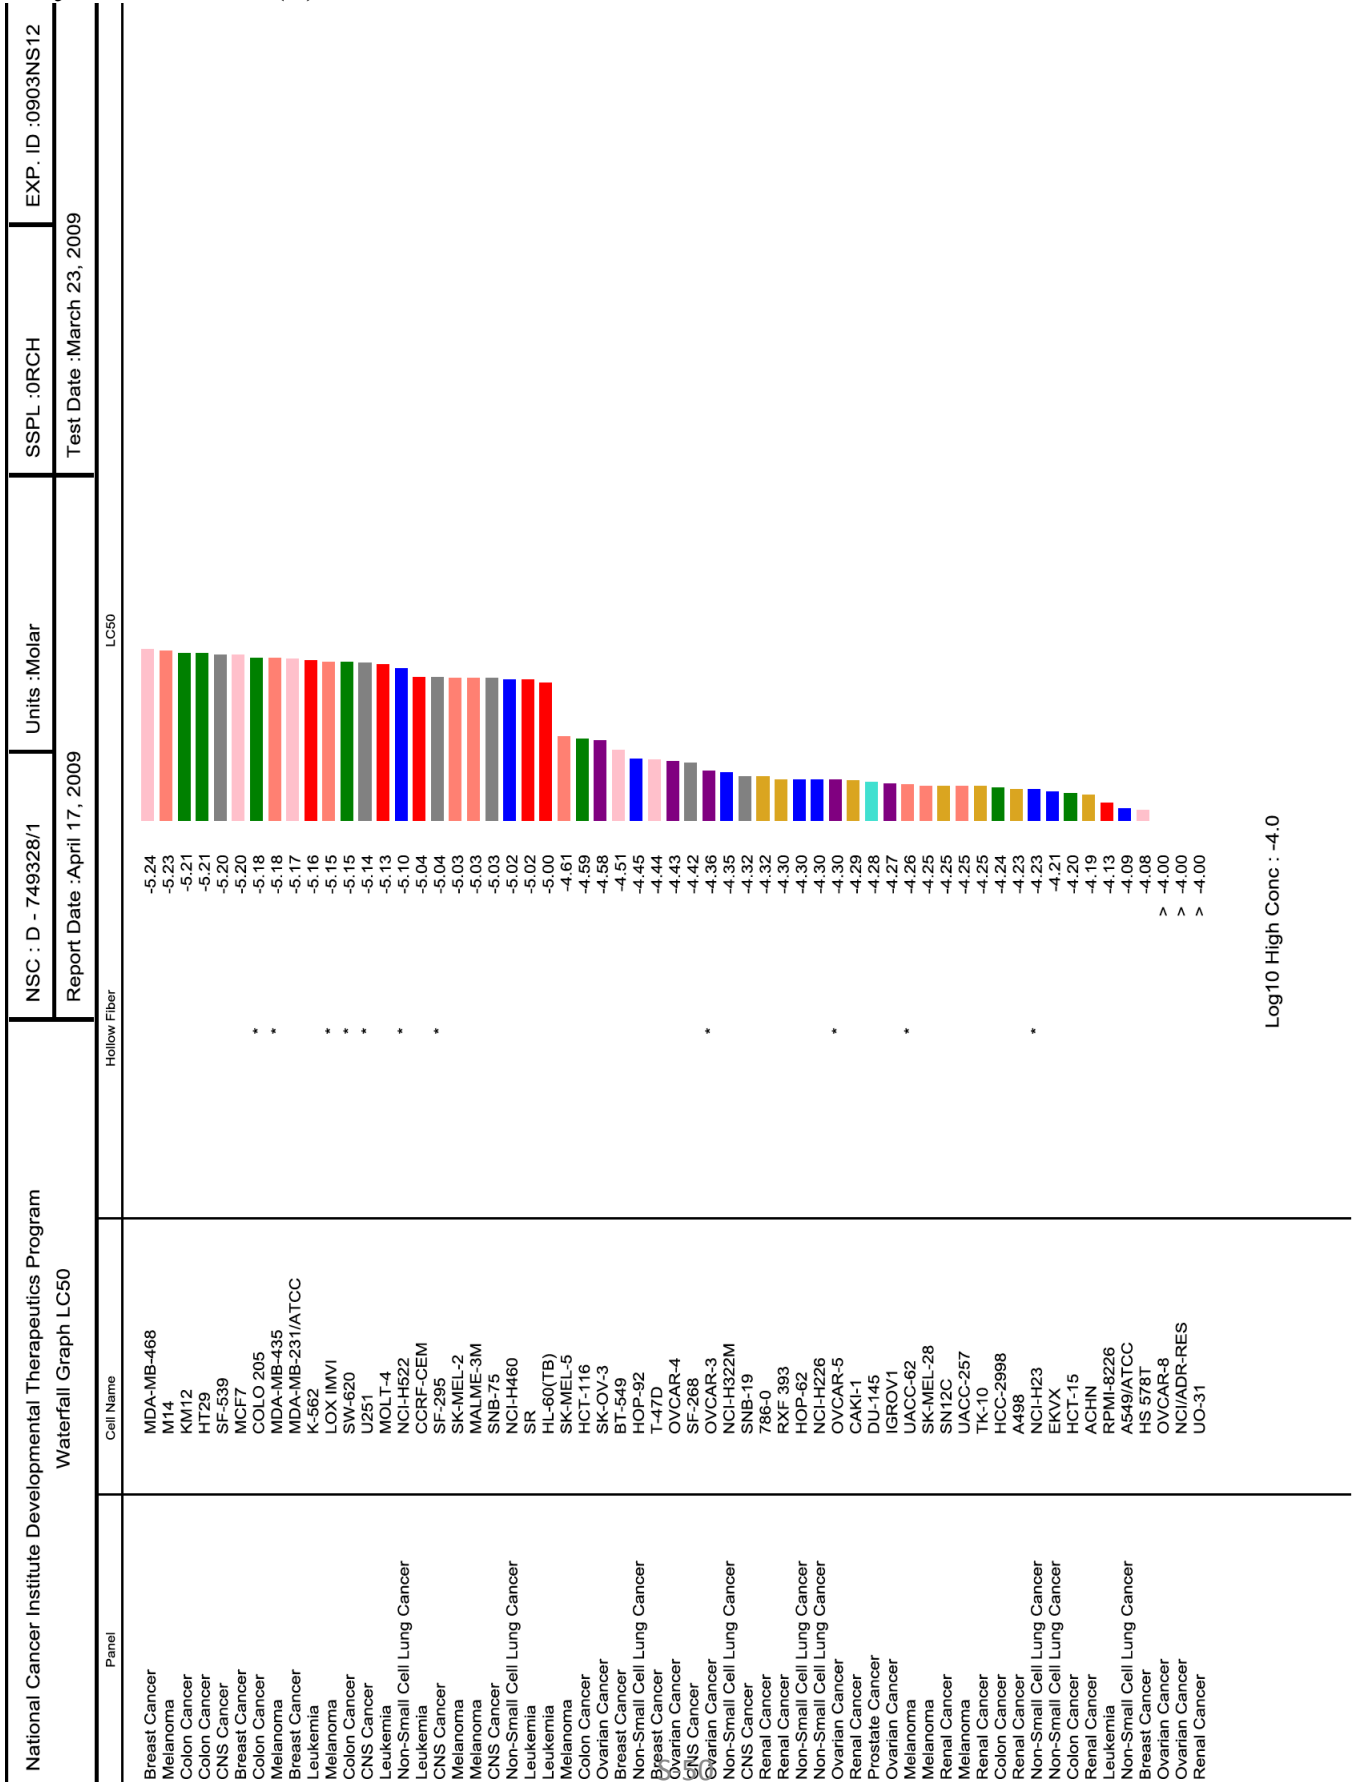

Log10 High Conc : -4.0

# Psychotrimine (1) – 5 Dose

NSC : D - 749328/1  
 Report Date :April 17, 2009

Units :Molar

SSPL :ORCH  
 Test Date :March 23, 2009

EXP. ID :0903NS12

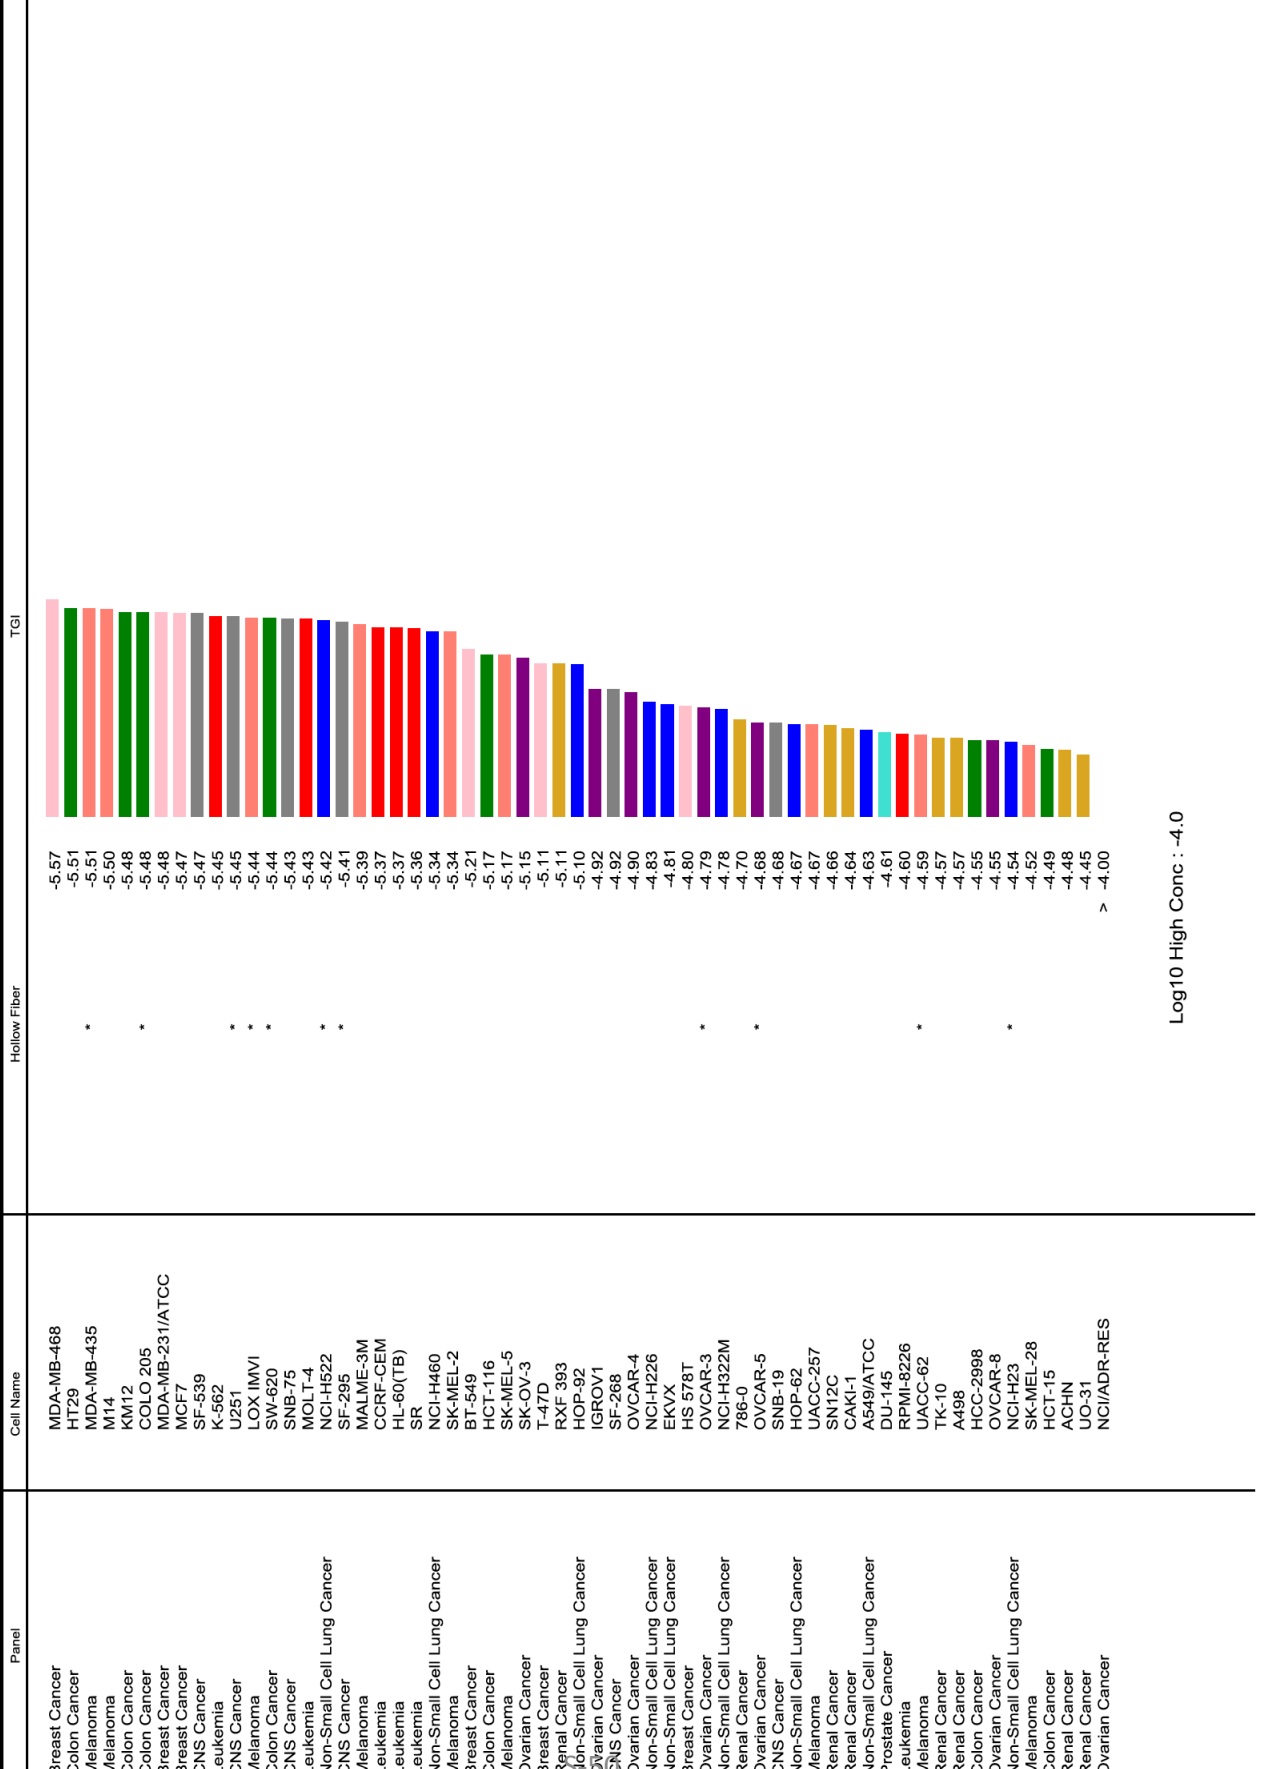

Log10 High Conc : -4.0



# Kapakahine F (2) – 1 Dose

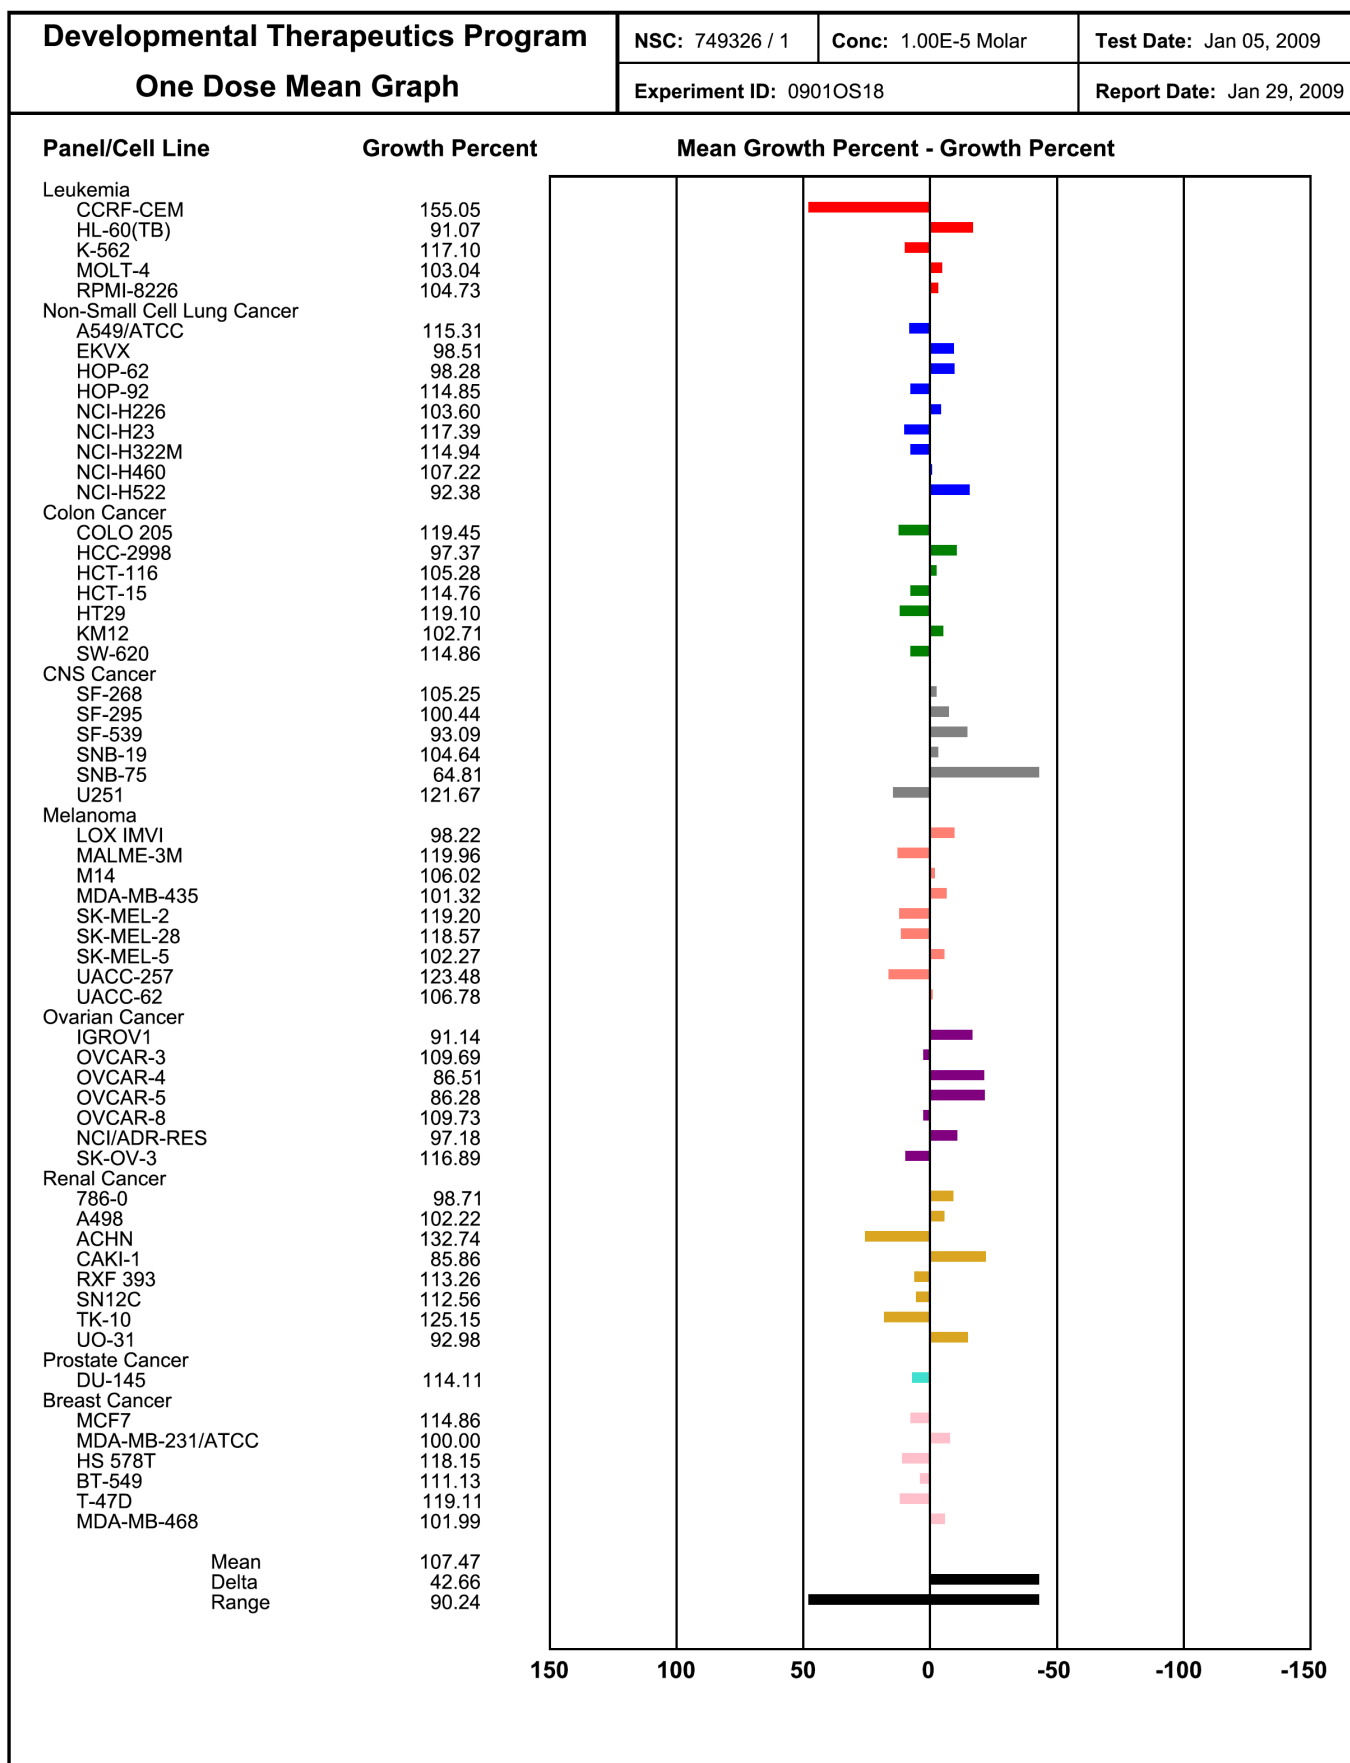

# Kapakahine B (3) – 1 Dose

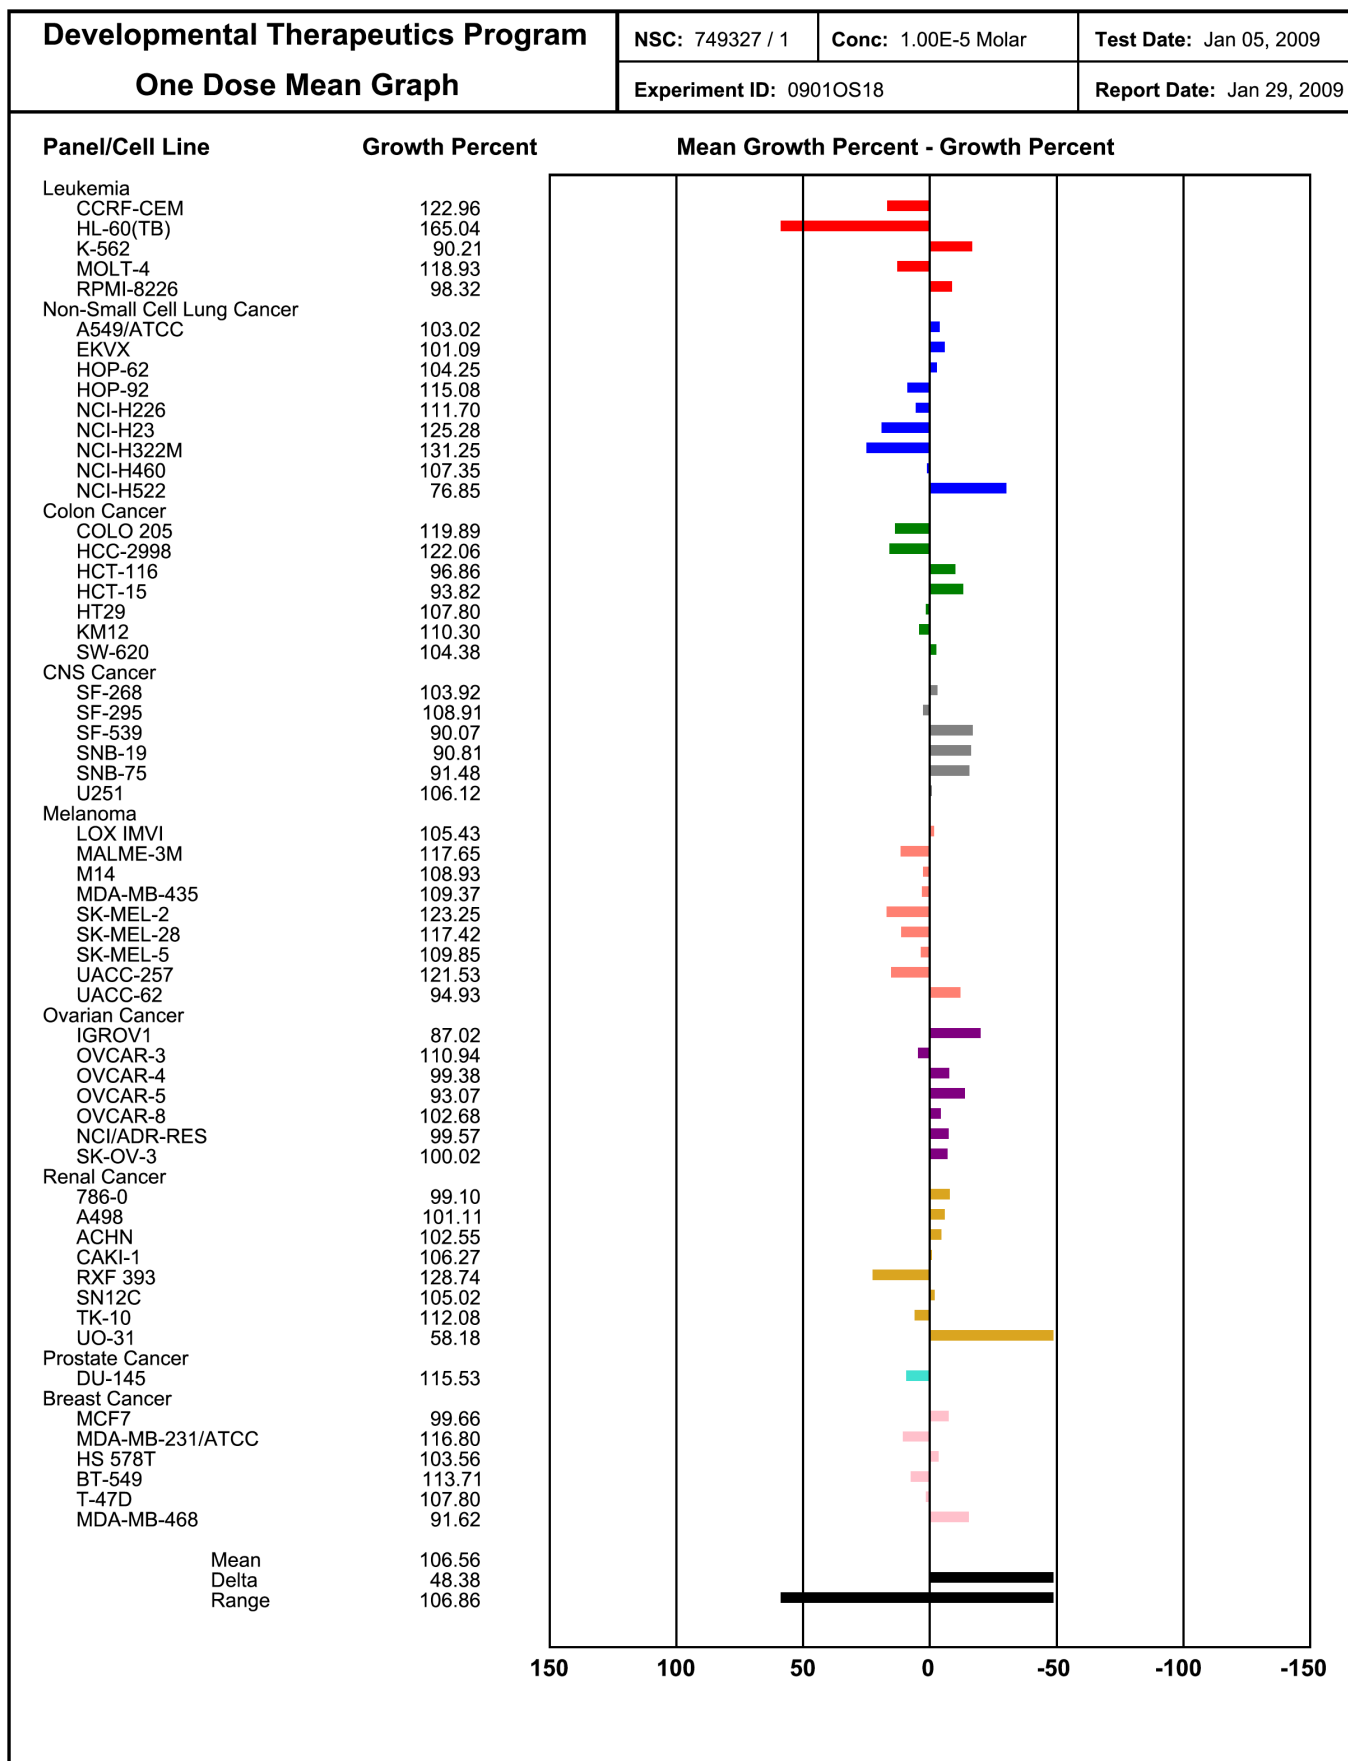

## Kapakahine F (2) and Kapakahine B (3)

| In Vitro Cytotoxicity Against a Human Tumor Cell Line Panel |                  |              |              |            |
|-------------------------------------------------------------|------------------|--------------|--------------|------------|
| Tumor Cell Line                                             | Tissue Type      | IC50 (uM)*   |              |            |
|                                                             |                  | Kapakahine B | Kapakahine F | Adriamycin |
| BT-549                                                      | Breast           | 45.3         | >50.0        | 0.005      |
| DU4475                                                      | Breast           | 11.7         | 49.0         | <0.003     |
| MDA-MB-468                                                  | Breast           | 26.3         | >50.0        | 0.016      |
| A549                                                        | Lung             | >50.0        | >50.0        | 0.376      |
| PC-3                                                        | Prostate         | >50.0        | >50.0        | 0.201      |
| LNCaP-FGC                                                   | Prostate         | >50.0        | >50.0        | 0.007      |
| HCT116                                                      | Colon            | >50.0        | >50.0        | 0.022      |
| MDA-MB-231                                                  | Breast           | 49.1         | >50.0        | 0.040      |
| A2780                                                       | Ovary            | 49.8         | >50.0        | 0.005      |
| Du145                                                       | Prostate         | >50.0        | >50.0        | 0.024      |
| CCRF-CEM                                                    | Leukemia         | 22.7         | >50.0        | 0.011      |
| H661                                                        | Lung             | 20.8         | >50.0        | 0.077      |
| P388                                                        | Leukemia (mouse) | >50.0        | >50.0        | 0.014      |

\* Cell treated with drug for 72 hr and cytotoxicity evaluated by MTS tetrazolium dye conversion assay.
